# Supplementary material for: Transformation-induced stress at telomeres is counteracted through changes in the telomeric proteome including SAMHD1
Source: PubMed Central journal article supplement (PMC6238619; doi:10.26508/lsa.201800121), 2018-07-17
Supplement: LSA-2018-00121_TableS2.pdf [file LSA-2018-00121_TableS2.pdf]

**Table S2** Detailed analysis of the metaphase spreads shown in Fig 5C. Displayed are percentages of chromosome ends (also known as telomeres) with normal and abnormal telomeric FISH signals and a number of scored telomeres and metaphases per condition. Fragile = smeary or multiple telomeric signals; Outside = telomeric signal positioned outside the DAPI-stained chromatid end; Apposition = sister telomere association/fusion; Fusion = non-sister telomere association/fusion.

| HLF-TSR<br>siRNA-replicate | % of telomeres |         |      |         |            |        | No. of scored |            |
|----------------------------|----------------|---------|------|---------|------------|--------|---------------|------------|
|                            | Normal         | Fragile | Loss | Outside | Apposition | Fusion | Telomeres     | Metaphases |
| siGFP-1                    | 94.1           | 4.7     | 0.5  | 0.1     | 0.7        | 0.0    | 2082          | 19         |
| siGFP-2                    | 95.1           | 3.0     | 0.7  | 0.1     | 1.2        | 0.0    | 1828          | 18         |
| siGFP-3                    | 92.8           | 6.2     | 0.2  | 0.0     | 0.7        | 0.0    | 2157          | 15         |
| siSAMHD1-1                 | 92.0           | 6.7     | 1.0  | 0.2     | 0.1        | 0.0    | 3730          | 28         |
| siSAMHD1-2                 | 94.2           | 4.8     | 0.8  | 0.2     | 0.0        | 0.1    | 1951          | 24         |
| siDCLRE1B-1                | 92.0           | 5.7     | 0.7  | 0.0     | 1.6        | 0.0    | 1740          | 28         |
| siDCLRE1B-2                | 90.1           | 8.4     | 0.9  | 0.1     | 0.5        | 0.0    | 3935          | 24         |
| siTMPO-1                   | 94.6           | 4.6     | 0.6  | 0.0     | 0.1        | 0.1    | 3508          | 28         |
| siTMPO-2                   | 95.1           | 4.0     | 0.7  | 0.2     | 0.1        | 0.0    | 2522          | 24         |
| siNPAT-1                   | 95.5           | 3.9     | 0.5  | 0.1     | 0.0        | 0.0    | 2163          | 28         |
| siNPAT-2                   | 93.9           | 5.0     | 1.0  | 0.2     | 0.0        | 0.0    | 505           | 24         |
| siPARP9-1                  | 93.1           | 6.1     | 0.5  | 0.1     | 0.0        | 0.2    | 3058          | 28         |
| siPARP9-2                  | 92.2           | 6.6     | 0.7  | 0.1     | 0.4        | 0.1    | 1701          | 24         |
| siPNUTS-1                  | 87.8           | 11.3    | 0.6  | 0.2     | 0.0        | 0.0    | 3128          | 28         |
| siPNUTS-2                  | 89.3           | 10.0    | 0.4  | 0.1     | 0.2        | 0.0    | 3354          | 24         |
| siSMCHD1-1                 | 89.1           | 10.3    | 0.6  | 0.0     | 0.0        | 0.0    | 3230          | 28         |
| siSMCHD1-2                 | 93.1           | 6.3     | 0.3  | 0.0     | 0.2        | 0.0    | 2469          | 24         |

| HeLa<br>siRNA | % of telomeres |         |      |         |            |        | No. of scored |            |
|---------------|----------------|---------|------|---------|------------|--------|---------------|------------|
|               | Normal         | Fragile | Loss | Outside | Apposition | Fusion | Telomeres     | Metaphases |
| siGFP         | 93.2           | 6.3     | 0.0  | 0.1     | 0.5        | 0.0    | 1739          | 32         |
| siSAMHD1      | 91.5           | 7.5     | 0.2  | 0.6     | 0.3        | 0.0    | 2961          | 32         |
| siDCLRE1B     | 92.3           | 6.4     | 0.4  | 0.6     | 0.3        | 0.0    | 3801          | 32         |
| siTMPO        | 88.7           | 10.5    | 0.4  | 0.3     | 0.1        | 0.0    | 3852          | 32         |
| siNPAT        | 81.9           | 17.5    | 0.4  | 0.1     | 0.1        | 0.0    | 2091          | 32         |
| siPARP9       | 89.2           | 10.3    | 0.2  | 0.3     | 0.0        | 0.0    | 2692          | 32         |
| siPNUTS       | 83.7           | 16.2    | 0.1  | 0.1     | 0.0        | 0.0    | 1212          | 26         |
| siSMCHD1      | 89.5           | 8.0     | 0.2  | 2.0     | 0.3        | 0.0    | 1874          | 32         |
