# Supplementary material for: Transformation-induced stress at telomeres is counteracted through changes in the telomeric proteome including SAMHD1
Source: PubMed Central journal article supplement (PMC6238619; doi:10.26508/lsa.201800121), 2018-07-17
Supplement: LSA-2018-00121_TableS3.pdf [file LSA-2018-00121_TableS3.pdf]

**Table S3** Detailed analysis of the metaphase spreads shown in Fig 6. Displayed are percentages of chromosome ends (also known as telomeres) with normal and abnormal telomeric FISH signals and a number of scored telomeres and metaphases per condition. Fragile = smeary or multiple telomeric signals; Outside = telomeric signal positioned outside the DAPI-stained chromatid end; Apposition = sister telomere association/fusion; Fusion = non-sister telomere association/fusion.

|                  | shSAMHD1 | shTRF1 or Aphidicolin | % of telomeres |         |      |         |            | Telomeres | Metaphases |        |
|------------------|----------|-----------------------|----------------|---------|------|---------|------------|-----------|------------|--------|
|                  |          |                       | Normal         | Fragile | Loss | Outside | Apposition |           |            | Fusion |
| Replicate 1      | EV       | EV                    | 96.3           | 2.7     | 0.2  | 0.2     | 0.6        | 0.0       | 4062       | 27     |
|                  | #2       | EV                    | 88.9           | 9.6     | 0.3  | 0.7     | 0.4        | 0.0       | 4702       | 27     |
|                  | #4       | EV                    | 89.1           | 9.1     | 0.3  | 0.7     | 0.7        | 0.0       | 4912       | 27     |
|                  | EV       | shTRF1                | 88.1           | 7.6     | 0.5  | 2.1     | 1.1        | 0.6       | 4455       | 27     |
|                  | #2       | shTRF1                | 83.5           | 6.2     | 0.8  | 8.1     | 1.1        | 0.1       | 5423       | 27     |
|                  | #4       | shTRF1                | 87.6           | 6.5     | 0.3  | 4.6     | 0.9        | 0.0       | 5327       | 27     |
| Replicate 2      | EV       | EV                    | 89.1           | 10.2    | 0.2  | 0.0     | 0.4        | 0.1       | 5258       | 27     |
|                  | #2       | EV                    | 85.6           | 14.1    | 0.1  | 0.1     | 0.1        | 0.0       | 6278       | 27     |
|                  | #4       | EV                    | 84.8           | 13.1    | 0.6  | 0.4     | 1.2        | 0.0       | 2710       | 27     |
|                  | EV       | shTRF1                | 78.7           | 17.1    | 0.4  | 2.1     | 1.2        | 0.6       | 5605       | 27     |
|                  | #2       | shTRF1                | 79.8           | 11.9    | 0.2  | 7.0     | 1.0        | 0.1       | 5816       | 27     |
|                  | #4       | shTRF1                | 81.6           | 12.4    | 0.2  | 4.3     | 1.2        | 0.3       | 4009       | 27     |
| Replicate 3      | EV       | EV                    | 93.4           | 6.2     | 0.2  | 0.1     | 0.0        | 0.1       | 5319       | 27     |
|                  | #2       | EV                    | 92.6           | 7.0     | 0.2  | 0.2     | 0.0        | 0.0       | 5624       | 27     |
|                  | #4       | EV                    | 93.2           | 6.1     | 0.2  | 0.4     | 0.0        | 0.0       | 5624       | 27     |
|                  | EV       | shTRF1                | 89.9           | 6.4     | 0.4  | 0.9     | 1.4        | 0.9       | 5381       | 27     |
|                  | #2       | shTRF1                | 88.7           | 5.5     | 0.9  | 4.5     | 0.3        | 0.1       | 5345       | 27     |
|                  | #4       | shTRF1                | 89.1           | 6.0     | 0.8  | 2.9     | 0.4        | 0.7       | 5385       | 27     |
| Single replicate | EV       | -                     | 93.2           | 6.5     | 0.2  | 0.1     | 0.0        | 0.0       | 6056       | 35     |
|                  | #2       | -                     | 89.7           | 9.7     | 0.4  | 0.2     | 0.0        | 0.0       | 3401       | 17     |
|                  | #4       | -                     | 92.2           | 7.4     | 0.2  | 0.2     | 0.0        | 0.0       | 3794       | 21     |
|                  | EV       | Aph.                  | 89.5           | 9.8     | 0.4  | 0.0     | 0.3        | 0.0       | 3557       | 37     |
|                  | #2       | Aph.                  | 89.4           | 9.7     | 0.3  | 0.1     | 0.4        | 0.0       | 3362       | 28     |
|                  | #4       | Aph.                  | 94.6           | 4.5     | 0.2  | 0.2     | 0.4        | 0.1       | 3254       | 33     |
