# Supplementary material for: Transformation-induced stress at telomeres is counteracted through changes in the telomeric proteome including SAMHD1
Source: PubMed Central journal article supplement (PMC6238619; doi:10.26508/lsa.201800121), 2018-07-17
Supplement: LSA-2018-00121_TableS4.pdf [file LSA-2018-00121_TableS4.pdf]

**Table S4** List of primers for RT-qPCR of TERRA.

| <b>Primer ID</b> | <b>Primer sequence</b>             | <b>Target</b>                                   |
|------------------|------------------------------------|-------------------------------------------------|
| MF604_tRT        | CCCTAACCCCTAACCCCTAACCCCTAACCCCTAA | RT oligo for human TERRA, as telomeric repeats. |
| MF629F           | AGCCACATCGCTCAGACAC                | GAPDH                                           |
| MF630R           | GCCCAATACGACCAAATCC                | GAPDH                                           |
| PN379            | TAAGCCGAAGCCTAACTCGTGTC            | Amplification for 2p subtelomere.               |
| PN378            | GTAAAGGCGAAGCAGCATTCTCC            | Amplification for 2p subtelomere.               |
| MF654R           | ACATGAGGAATGTGGGTGTTAT             | Amplification for 9p subtelomere.               |
| MF653F           | GAGATTCTCCCAAGGCAAGG               | Amplification for 9p subtelomere.               |
| MF624R           | GATCCCACTGTTTTTATTACTGTTCCCT       | Amplification for 17p subtelomere.              |
| MF623F           | GGGACAGAAGTGGATAAGCTGATC           | Amplification for 17p subtelomere.              |
| PN446R           | TTTGTTCACTGTGCGATGCG               | Amplification for 20q subtelomere.              |
| PN445F           | GCAGCTTTCTCAGCACAC                 | Amplification for 20q subtelomere.              |
| MF807F           | CGGCCGAGTTGCGTTCTCG                | Amplification for Xq subtelomere.               |
| MF811R           | GCACATGAGGAATGTGGGTG               | Amplification for Xq subtelomere.               |
| MF812F           | ATTCTCCTCAGGTCAGACCCG              | Amplification for 15 subtelomere.               |
| MF814R           | CTAACCGTGACCCTGACCCCG              | Amplification for 15 subtelomere.               |
