# Supplementary material for: Transformation-induced stress at telomeres is counteracted through changes in the telomeric proteome including SAMHD1
Source: PubMed Central journal article supplement (PMC6238619; doi:10.26508/lsa.201800121), 2018-07-17
Supplement: LSA-2018-00121_TableS5.pdf [file LSA-2018-00121_TableS5.pdf]

**Table S5.** List of primers for RT-qPCR to verify candidate depletion.

| <b>Target</b> | <b>Primer ID</b> | <b>Target sequence</b>   | <b>Source</b>               |
|---------------|------------------|--------------------------|-----------------------------|
| DCLRE1B       | JM013F           | TGGAACCATCCTCTACACAGGT   | This study*                 |
|               | JM014R           | GGATCTGTTTCCCCAGTGTCA    |                             |
| GAPDH         | JM051F           | AGCCACATCGCTCAGACAC      | (Feretzaki & Lingner, 2017) |
|               | JM052R           | GCCAATACGACCAAATCC       |                             |
| NPAT          | JM077F           | TCCCAGTATCTGTGGTTGGAC    | This study*                 |
|               | JM078R           | CAGGTGCTGTCAAAGGCATA     |                             |
| PARP9         | JM065F           | GGCAAAGAGGTCCAAGATGCTG   | (Bachmann et al, 2014)      |
|               | JM066R           | GCCTCACACATCTCTTCCACGT   |                             |
| PNUTS         | JM069F           | AAAACGAGCACAGAACCAA      | (Kavela et al, 2013)        |
|               | JM070R           | GGCTCCAAAGAGGCTGTAT      |                             |
| SAMHD1        | JM019F           | GAGTCTCGTTTTGAAAATCTTGGA | This study*                 |
|               | JM020R           | CCAATCGCTGGATATAACTAAGCA |                             |
| SMCHD1        | JM057F           | TAACAACGGGCGTGTATAGG     | (Tang et al, 2014)          |
|               | JM058R           | TGGTACTGGACGAACATATCCTG  |                             |
| TMPO          | JM039F           | CGGAGTGAATCCTGGTCCTATT   | This study*                 |
|               | JM040R           | CCATTCTGCCTTGTATTTTCTGC  |                             |

\*Primers were designed using ProbeFinder for the Human Universal ProbeLibrary ([www.universalprobelibrary.com](http://www.universalprobelibrary.com)) from Roche. Primers were designed to recognize common regions of genes that comprise multiple transcript variants.
