# Supplementary material for: Transformation-induced stress at telomeres is counteracted through changes in the telomeric proteome including SAMHD1
Source: Life Sci Alliance. 2018 Jul 17;1(4):e201800121. doi: 10.26508/lsa.201800121 (PMC6238619; doi:10.26508/lsa.201800121)
Supplement: Supplementary file 1 [file LSA-2018-00121_TableS1.xlsx]

## Sheet: List A
List of all identified proteins
				log2 TRF/IgG enrichment				TRF/IgG enrichment: Significant?				TRF/IgG enrichment: Significance A				log2 SILAC ratio in input				log2 SILAC ratio in TRF IP				Razor+unique peptides in TRF IP								Razor+unique peptides in IgG IP
Gene names	Protein names	Protein IDs	Majority IDs	QTIP1	QTIP2	QTIP3	QTIP4	QTIP1	QTIP2	QTIP3	QTIP4	QTIP1	QTIP2	QTIP3	QTIP4	HLF-TSR / HLF	HLF-TSR / HLF-T	HLF-TSR / HLF-TS	HLF-TS / HLF-T	HLF-TSR / HLF	HLF-TSR / HLF-T	HLF-TSR / HLF-TS	HLF-TS / HLF-T	QTIP1 Forward	QTIP1 Reverse	QTIP2 Forward	QTIP2 Reverse	QTIP3 Forward	QTIP3 Reverse	QTIP4 Forward	QTIP4 Reverse	QTIP1 Forward	QTIP1 Reverse	QTIP2 Forward	QTIP2 Reverse	QTIP3 Forward	QTIP3 Reverse	QTIP4 Forward	QTIP4 Reverse
AARS	Alanine--tRNA ligase, cytoplasmic	P49588;P49588-2;H3BPK7	P49588;P49588-2	1.6277	-0.172812	-0.312655	-0.286631					0.10712	0.555024	0.593824	0.621008	0.0994089	0.218018	-0.412731	0.58856	-0.0359101	0.232391	0.20122	0.59185	8	10	9	10	0	4	4	4	2	5	10	9	2	2	3	6
AASDHPPT	L-aminoadipate-semialdehyde dehydrogenase-phosphopantetheinyl transferase	Q9NRN7;Q9NRN7-2;E9PLW6;E9PNF3	Q9NRN7;Q9NRN7-2;E9PLW6	-0.248431	-1.66306	-0.0970906	0					0.575174	0.908496	0.529383	0.5	0.358849	0.778179	0.183207	0.252729	NaN	0.993218	NaN	NaN	0	1	1	2	0	0	0	0	0	1	3	2	0	1	0	0
ABCC1	Multidrug resistance-associated protein 1	I3L4X2;P33527-4;P33527;P33527-9;P33527-6;P33527-2;P33527-7;P33527-3;P33527-8;P33527-5;A0A0A0MS99;H0Y8Q6;O15438-2;O15438;O15438-4	I3L4X2;P33527-4;P33527;P33527-9;P33527-6;P33527-2;P33527-7;P33527-3;P33527-8;P33527-5;A0A0A0MS99	-0.297519	-1.53824	-0.0970906	0					0.589795	0.890954	0.529383	0.5	-1.12812	-0.893251	0.147578	-1.22996	NaN	NaN	NaN	NaN	0	0	1	0	0	0	0	0	0	0	3	1	0	0	0	0
ABCE1	ATP-binding cassette sub-family E member 1	P61221;D6R9I9;D6RGF4;H0Y990	P61221;D6R9I9	0.280273	-0.751793	1.68916	-0.0681843					0.415329	0.726391	0.099826	0.529216	0.314385	0.214706	0.333424	0.253346	NaN	0.187915	0.26025	NaN	0	1	8	4	1	3	1	0	0	0	7	4	0	1	1	0
ABCF1	ATP-binding cassette sub-family F member 1	Q8NE71-2;Q8NE71;H0YGW7;Q5STZ8	Q8NE71-2;Q8NE71;H0YGW7	-1.02359	-0.260625	-0.266108	0.0209948					0.78261	0.582648	0.580061	0.490997	0.287487	0.255024	0.18993	0.21802	0.289152	0.177961	0.247728	0.644981	1	3	4	3	3	3	4	5	1	7	4	4	3	5	3	5
ABCF2	ATP-binding cassette sub-family F member 2	Q9UG63;Q9UG63-2;C9JHK9;C9JZV3	Q9UG63;Q9UG63-2	-1.29752	-0.979735	-0.0970906	0					0.838926	0.783609	0.529383	0.5	0.348581	0.0682122	0.379936	-0.517189	NaN	0.110637	NaN	-0.218785	0	0	3	1	0	0	0	1	1	1	2	2	0	0	0	1
ABHD14B	Alpha/beta hydrolase domain-containing protein 14B	B4DQI4;Q96IU4;F8W9U3	B4DQI4;Q96IU4;F8W9U3	1.94873	-0.183097	-0.539722	-0.657237					0.0685145	0.558276	0.659024	0.760072	-1.03535	-0.962049	-0.13067	-0.73577	-1.20833	-0.991926	NaN	-0.593889	5	2	3	3	1	0	2	2	0	3	4	3	1	1	1	4
ACAA2	3-ketoacyl-CoA thiolase, mitochondrial	P42765;A0A0B4J2A4;K7EME0;K7ER88;K7EJB1;K7EJ68	P42765;A0A0B4J2A4	-1.38941	1.04987	-0.0970906	-1.15243					0.855467	0.200288	0.529383	0.892304	-1.25095	-0.370091	NaN	-0.932912	NaN	-0.860784	NaN	NaN	1	0	3	1	0	0	0	0	0	1	1	0	0	0	0	1
ACAD9	Acyl-CoA dehydrogenase family member 9, mitochondrial	H0Y8Z9;Q9H845	H0Y8Z9;Q9H845	-0.380748	1.19896	0.447382	-0.184692					0.614292	0.168536	0.367046	0.578691	NaN	-1.47946	NaN	NaN	NaN	NaN	NaN	NaN	1	0	1	0	0	1	0	1	1	0	1	0	0	1	1	0
ACAT1	Acetyl-CoA acetyltransferase, mitochondrial	P24752;H0YEL7;P24752-2;E9PKF3;E9PRQ6	P24752	-0.458686	0.786664	-0.0970906	-0.493266					0.636828	0.264395	0.529383	0.702036	-0.511003	-0.445888	NaN	NaN	0.0280547	-0.41895	NaN	NaN	1	2	2	2	0	0	0	0	1	1	3	2	0	0	0	1
ACAT2	Acetyl-CoA acetyltransferase, cytosolic	Q9BWD1;Q9BWD1-2	Q9BWD1;Q9BWD1-2	-0.826222	-1.00028	-0.342002	-1.09819					0.735795	0.788402	0.602443	0.881111	-0.144298	0.63656	-0.382673	1.05661	NaN	0.640156	-0.387272	1.1531	0	0	1	2	2	3	1	3	0	1	2	2	2	3	1	3
ACD	Adrenocortical dysplasia protein homolog	A0A0C4DGT6;Q96AP0;Q96AP0-2;R4GNJ5	A0A0C4DGT6;Q96AP0;Q96AP0-2;R4GNJ5	6.53913	6.25323	6.26962	6.56497	+	+	+	+	3.03e-07	2.77e-07	9.66e-07	8.48e-13	NaN	NaN	NaN	NaN	0.769691	0.0694127	-0.209894	0.0993251	11	11	10	10	9	6	12	11	0	0	0	0	0	0	0	1
ACLY	ATP-citrate synthase	P53396;P53396-2;P53396-3;K7ESG8;K7EIE7	P53396;P53396-2;P53396-3	-0.515455	-0.316215	-0.184513	0.0236161					0.652955	0.599936	0.555708	0.489873	-0.192328	-0.158184	0.0298263	0.198036	-0.336601	-0.103695	-0.0470804	0.172727	31	36	44	37	38	35	34	36	34	36	47	37	32	36	31	39
ACO1	Cytoplasmic aconitate hydratase	P21399	P21399	-0.962533	0.0827303	0.590726	0.027743					0.768662	0.473594	0.326887	0.488104	-0.372954	-1.23961	NaN	-2.77334	-1.73253	-1.37648	0.484079	-2.38043	5	4	11	8	1	0	3	7	5	8	7	5	0	1	3	8
ACOT7	Cytosolic acyl coenzyme A thioester hydrolase	O00154-4;O00154-6;O00154-7;O00154;O00154-5;O00154-2;O00154-3;K7EKP8;Q6ZUV0	O00154-4;O00154-6;O00154-7;O00154;O00154-5;O00154-2;O00154-3;K7EKP8	-0.297519	-0.548539	0.357466	0.683045					0.589795	0.66974	0.393035	0.23139	0.263613	0.240389	-0.202524	0.695495	-0.217904	NaN	0.0578487	NaN	0	2	1	1	1	4	1	0	0	0	1	1	3	1	2	0
ACOX1	Peroxisomal acyl-coenzyme A oxidase 1	Q15067-3;Q15067-2;Q15067	Q15067-3;Q15067-2;Q15067	-0.297519	-2.0988	-0.0970906	-1.86017					0.589795	0.953564	0.529383	0.977233	NaN	NaN	NaN	NaN	NaN	NaN	NaN	NaN	0	0	0	0	0	0	1	0	0	0	2	0	0	0	1	1
ACP1	Low molecular weight phosphotyrosine protein phosphatase	P24666;G5E9R5;P24666-4;F2Z2Q9	P24666;G5E9R5;P24666-4;F2Z2Q9	1.37268	0.305333	0.116298	0.587354					0.147457	0.403434	0.464818	0.263887	-0.0345006	0.0780912	-0.153413	0.0723548	0.0647033	0.373816	-0.161073	0.0622435	4	3	5	5	4	4	4	5	1	2	3	5	3	4	3	4
ACSL3	Long-chain-fatty-acid--CoA ligase 3	O95573;F5GWH2;C9JC11;F5H062	O95573	3.40457	2.53944	-0.123777	1.63982	+	+		+	0.00469107	0.0210139	0.537438	0.0389654	-0.135593	-0.0177129	0.174207	0.0229373	-0.596378	-0.368304	NaN	-0.267852	1	2	2	2	1	0	2	2	0	0	1	0	0	1	1	1
ACSL4	Long-chain-fatty-acid--CoA ligase 4	O60488-2;O60488;D6RF95;D6RFW9;D6RDA8;D6RD96;H0Y9A0	O60488-2;O60488	2.62735	3.23215	0.902909	0.506734	+	+			0.0224946	0.00482854	0.246495	0.292966	-0.424995	-0.742105	-0.00973271	-0.917609	0.131387	-0.671731	NaN	NaN	2	2	9	3	1	1	1	1	0	1	1	0	0	0	0	1
ACTG1	Actin, cytoplasmic 2;Actin, cytoplasmic 2, N-terminally processed	P63261;I3L3I0;I3L1U9;I3L4N8;I3L3R2;J3KT65;K7EM38	P63261;I3L3I0;I3L1U9;I3L4N8	-0.215747	-0.221713	-0.0650661	0.0338358					0.56538	0.570449	0.519701	0.485492	-0.469365	-0.260536	-0.799962	0.280312	-0.462596	-0.228282	-0.754255	0.244072	22	22	24	22	22	22	21	23	22	23	23	22	22	21	21	23
ACTL6A	Actin-like protein 6A	O96019-2;O96019;C9JQT2;H7C5S0;O94805	O96019-2;O96019	-0.936628	-0.352811	0.558702	0					0.762597	0.611214	0.335706	0.5	NaN	0.858279	-0.0071629	0.538866	NaN	NaN	0.0406689	NaN	0	0	1	0	3	2	1	0	1	0	1	0	3	1	0	0
ACTN1	Alpha-actinin-1	P12814;P12814-3;P12814-2;P12814-4;H9KV75;G3V2N5;P35609-2;P35609;H7C5W8;G3V2W4;H0YJW3;H0YJ11;Q08043;A0A087WSZ2;G3V5M4;G3V2X9;F6THM6;G3V380;G3V2E8;D6RH00	P12814;P12814-3;P12814-2;P12814-4;H9KV75	-0.286716	-0.0650184	0.687059	0.499062					0.586587	0.520759	0.30095	0.295808	-0.930377	-0.711731	-0.603142	-0.021474	-1.2072	-0.796954	-0.568799	-0.0226488	22	19	32	26	19	18	20	24	14	19	28	23	9	14	16	21
ACTN4	Alpha-actinin-4	O43707;O43707-2;O43707-3;F5GXS2;H7C144;K7EJH8;K7EP19	O43707;O43707-2;O43707-3;F5GXS2	-0.126442	-0.197697	0.487472	0.0251694					0.53843	0.562886	0.355644	0.489207	-0.419802	-0.398279	-0.462345	0.145348	-0.878648	-0.536634	-0.465339	0.103628	27	22	39	36	19	16	24	30	23	25	42	37	15	13	21	29
ACTR1A	Alpha-centractin	P61163;R4GMT0	P61163;R4GMT0	-0.240544	-0.197869	-0.863283	-0.568574					0.572814	0.56294	0.743918	0.729473	-0.527085	-0.247242	0.171407	0.0185698	-0.758143	-0.290811	NaN	0.131216	11	7	10	7	1	0	5	5	9	8	13	7	1	0	6	7
ACTR2	Actin-related protein 2	P61160;P61160-2;F5H6T1	P61160;P61160-2;F5H6T1	0.0986471	-0.110841	-1.12378	-0.263107					0.469999	0.535358	0.803242	0.611351	-0.675361	-0.419997	-0.138461	-0.141093	-0.900028	-0.528792	0.197381	-0.0787707	2	5	4	4	4	4	5	7	3	4	9	6	3	5	7	7
ACTR3	Actin-related protein 3	P61158;B4DXW1;Q9P1U1-2;Q9P1U1;F8WDR7;Q9P1U1-3;A0A0A0MTI9;H7C4J1;Q9C0K3;F8WEW2;F8WE84	P61158;B4DXW1	-0.444951	-0.227673	0.138603	0.309153					0.632888	0.572323	0.458093	0.369816	-0.629243	-0.352276	-0.0350658	-0.138593	-0.763963	-0.440078	-0.266975	-0.127685	8	7	18	15	9	6	9	10	11	9	19	13	8	6	10	12
ADAR	Double-stranded RNA-specific adenosine deaminase	P55265-5;P55265;P55265-4;P55265-3;H0YCK3;P55265-2	P55265-5;P55265;P55265-4;P55265-3;H0YCK3;P55265-2	-0.0978662	-1.62124	-0.472643	-1.52237					0.529763	0.902869	0.640153	0.949138	0.451004	0.315254	0.113153	0.0754326	0.256628	0.170614	0.209142	0.317897	4	4	4	3	7	8	4	4	4	4	7	5	9	8	6	9
ADD1	Alpha-adducin	P35611-2;E7EV99;P35611-6;E7ENY0;P35611;P35611-3;P35611-4;A0A0A0MSR2;P35611-5;H0Y9H2;D6RF25;D6RJE2;D6RAH3;H0YG19;P35612-2;P35612-8;P35612-9;P35612-4;P35612-3;P35612	P35611-2;E7EV99;P35611-6;E7ENY0;P35611;P35611-3;P35611-4;A0A0A0MSR2;P35611-5;H0Y9H2	-2.07439	0.394558	1.71507	2.01881				+	0.94327	0.376036	0.0964212	0.0149947	-0.920038	-0.772534	-0.30323	-0.190996	-0.976263	-0.88168	-0.392978	-0.0169176	0	2	2	0	5	5	8	4	2	2	1	1	2	2	2	2
ADD3	Gamma-adducin	Q9UEY8-2;Q9UEY8;A0A087WX08	Q9UEY8-2;Q9UEY8;A0A087WX08	-0.297519	-0.359996	2.49605	-0.671177			+		0.589795	0.613417	0.0290333	0.764705	-0.709719	-0.444081	-0.453359	0.225873	NaN	NaN	-0.279599	-0.55611	1	0	0	0	2	3	2	1	1	0	0	0	1	0	1	1
ADSL	Adenylosuccinate lyase	P30566;P30566-2;A0A0A6YY92;A0A096LNY5;A0A096LNY6;A0A096LP92;A0A096LPA2;A0A096LNY4;B4DEP1;A0A096LP72	P30566;P30566-2;A0A0A6YY92;A0A096LNY5;A0A096LNY6	-2.65218	-2.31236	-1.42065	-2.58496					0.9785	0.967946	0.859632	0.997272	-0.114007	0.108332	-0.226604	0.249666	NaN	NaN	NaN	NaN	0	0	0	0	0	0	0	0	4	2	3	1	2	1	2	3
AHCY	Adenosylhomocysteinase	P23526;P23526-2	P23526;P23526-2	0.508239	-0.0139228	-0.437978	-0.255413					0.349081	0.504447	0.630262	0.608177	0.150485	0.249745	-0.0398115	0.484469	0.0345493	0.24693	-0.084696	0.492227	7	6	11	9	11	10	8	9	5	6	11	10	11	11	8	8
AHNAK	Neuroblast differentiation-associated protein AHNAK	Q09666;E9PJZ0;E9PKR9;E9PJC6;E9PLK4;Q09666-2;E9PQE3;P48552	Q09666	0.372071	-0.278486	0.479035	-0.0625754					0.388242	0.588222	0.358033	0.526816	-0.656936	-0.55093	-0.744368	-0.0418044	-0.799439	-0.636512	-0.337444	-0.116838	53	43	129	80	11	9	19	26	22	38	128	96	5	5	16	30
AHNAK2	Protein AHNAK2	Q8IVF2-3;Q8IVF2;Q8IVF2-2	Q8IVF2-3;Q8IVF2	2.14425	2.89175	-0.0970906	0		+			0.0509056	0.0102977	0.529383	0.5	NaN	-0.703422	-0.63779	0.752889	-0.576154	-0.536235	NaN	NaN	0	3	7	8	0	0	0	0	0	0	2	2	0	0	0	0
AHSA1	Activator of 90 kDa heat shock protein ATPase homolog 1	G3V438;O95433;H0YJ63;H0YJG7;O95433-2;H0YJU2	G3V438;O95433;H0YJ63;H0YJG7;O95433-2	0.280273	-1.30442	1.94334	-0.314294					0.415329	0.85185	0.0700346	0.632269	0.663721	0.457715	0.469789	0.318926	NaN	NaN	NaN	0.440503	0	1	0	1	1	2	1	1	0	0	2	1	0	0	0	1
AIFM1	Apoptosis-inducing factor 1, mitochondrial	O95831-3;O95831;O95831-2;O95831-5;E9PMA0;O95831-6;O95831-4	O95831-3;O95831;O95831-2;O95831-5;E9PMA0	-0.801837	-1.38088	-0.68296	-0.685965					0.729675	0.865556	0.697965	0.769565	-0.294995	-0.42815	NaN	-0.666266	0.182426	-0.356136	NaN	-0.0312343	1	5	9	7	1	1	5	7	1	4	12	10	1	1	6	8
AIMP2	Aminoacyl tRNA synthase complex-interacting multifunctional protein 2	A8MU58;F8W950;Q13155	A8MU58;F8W950;Q13155	0.751569	0.1473	1.29821	-1.14865					0.283162	0.453058	0.16214	0.891549	-0.0456144	0.0417348	-0.139415	0.0488588	-0.288921	0.0563341	0.363321	-0.247939	1	1	2	2	2	2	1	2	1	1	2	2	1	2	1	3
AK1	Adenylate kinase isoenzyme 1	P00568;Q5T9B7;H0Y4J6;H0YID2	P00568;Q5T9B7;H0Y4J6	1.17893	-0.0974918	-0.0970906	-0.292667					0.184175	0.531109	0.529383	0.623475	-1.08427	-0.823676	-0.196144	-0.334351	-0.799595	-0.503072	0.488772	-0.3212	4	5	6	4	0	2	2	2	1	3	5	4	0	0	1	3
AKAP8	A-kinase anchor protein 8	O43823	O43823	1.47268	-0.259729	-0.0970906	0					0.130568	0.582368	0.529383	0.5	0.441854	0.474625	0.0593945	NaN	0.717847	NaN	NaN	NaN	1	1	0	1	0	0	0	0	0	1	1	0	0	0	0	0
AKD1;AK9	Adenylate kinase domain-containing protein 1	Q5TCS8;H7C517;Q5TCS8-3;Q5TCS8-6	Q5TCS8;H7C517	0.0427369	-0.913374	-0.0970906	0					0.486993	0.767704	0.529383	0.5	0.903868	1.04023	0.0363229	0.382112	-1.09117	NaN	NaN	NaN	2	2	0	0	0	0	0	0	1	2	1	0	0	0	0	0
AKR1A1	Alcohol dehydrogenase [NADP(+)]	P14550;V9GYG2;V9GYP9;Q5T621	P14550	0.702481	0.241108	-0.417384	0.974523					0.295973	0.423461	0.624344	0.147407	-0.580279	-0.149683	1.41562	-0.117349	NaN	-0.219344	NaN	0.112724	1	1	5	3	1	1	0	3	0	0	4	0	0	1	0	2
AKR1B1	Aldose reductase	P15121;E9PCX2;E9PEF9;C9JRZ8;C9JRZ8-2	P15121;E9PCX2	0.903697	0.924962	-0.183599	-0.384088					0.245238	0.229473	0.555434	0.660159	-0.194935	0.378408	1.24351	0.117357	-0.176245	0.288308	1.40778	-0.00690606	9	8	11	10	11	8	5	7	5	7	9	5	9	10	5	7
AKR1C1;AKR1C2;AKR1C3	Aldo-keto reductase family 1 member C1;Aldo-keto reductase family 1 member C2;Aldo-keto reductase family 1 member C3	Q04828;A0A0A0MT30;H0Y804;B4DK69;S4R3Z2;P52895;A0A0A0MSD5;P42330;A0A0A0MSS8;S4R3D5;A6NHU4;S4R3P0;P42330-2	Q04828;A0A0A0MT30;H0Y804;B4DK69;S4R3Z2;P52895;A0A0A0MSD5;P42330;A0A0A0MSS8	0.65547	0.432018	-0.0970906	0.837706					0.308486	0.364708	0.529383	0.183917	-1.99171	-1.74086	NaN	-2.56505	NaN	-1.90241	NaN	-2.58206	1	1	1	2	0	0	2	2	1	0	1	1	0	0	0	2
AKR1D1	3-oxo-5-beta-steroid 4-dehydrogenase	P51857-2;P51857;P51857-3	P51857-2;P51857;P51857-3	-0.826222	-2.40611	-0.0970906	1					0.735795	0.972979	0.529383	0.141186	2.22295	1.8987	NaN	1.4651	NaN	1.8717	NaN	1.45025	0	0	1	1	0	0	2	1	0	1	1	1	0	0	0	0
ALDH16A1	Aldehyde dehydrogenase family 16 member A1	F5H4B6;Q8IZ83-3;Q8IZ83	F5H4B6;Q8IZ83-3;Q8IZ83	-0.297519	-0.913374	0.460278	-1.60319					0.589795	0.767704	0.363365	0.957595	NaN	NaN	NaN	NaN	NaN	NaN	NaN	NaN	0	0	0	0	1	0	0	0	0	0	1	0	0	0	0	2
ALDH18A1	Delta-1-pyrroline-5-carboxylate synthase;Glutamate 5-kinase;Gamma-glutamyl phosphate reductase	P54886-2;P54886	P54886-2;P54886	-0.991972	-0.734059	0.452903	0.0809753					0.775448	0.721645	0.365468	0.465316	-0.73613	-1.22426	-0.573471	0.232869	-0.661116	-1.15626	-0.594649	0.137579	4	5	15	6	11	11	12	6	5	8	16	8	13	11	9	12
ALDOA	Fructose-bisphosphate aldolase A;Fructose-bisphosphate aldolase	P04075;P04075-2;H3BQN4;J3KPS3;H3BPS8;H3BUH7;H3BR04;H3BMQ8;H3BU78;H3BR68;A0A087WXX2;P05062	P04075;P04075-2;H3BQN4;J3KPS3;H3BPS8	0.125418	0.093741	0.0314577	0.0556509					0.46188	0.470085	0.490472	0.476148	-0.202134	-0.313993	0.0822778	0.308543	-0.36486	-0.307045	0.16065	0.241618	17	17	23	21	17	17	14	17	14	15	22	19	15	16	14	18
ALDOC	Fructose-bisphosphate aldolase C	P09972;K7EKH5;J3KSV6;J3QKP5;A8MVZ9;C9J8F3	P09972	0.280273	0.99776	1.94334	0.348841					0.415329	0.212182	0.0700346	0.353828	-0.281121	-0.282524	0.0827887	0.378016	NaN	-0.381743	-0.275461	0.13977	0	1	1	1	1	1	1	1	0	0	1	1	0	0	1	1
ALYREF	THO complex subunit 4	Q86V81;E9PB61	Q86V81;E9PB61	-0.522639	-1.46368	0.184035	-0.434537					0.654977	0.879385	0.444435	0.679796	0.775194	0.607209	-0.0579365	0.38018	0.636778	0.594277	-0.00118741	0.127689	9	10	1	2	2	3	1	1	11	8	4	3	3	2	1	2
ANKFY1	Ankyrin repeat and FYVE domain-containing protein 1	Q9P2R3;Q9P2R3-2;Q9P2R3-4;I3L3P8	Q9P2R3;Q9P2R3-2;Q9P2R3-4	-1.1024	0.155419	0.474822	-0.620014					0.799872	0.450484	0.359229	0.74746	-0.582991	0.115384	0.0426014	-0.266175	-0.512042	-0.0270505	-0.0882261	0.922432	1	2	4	3	2	2	1	1	3	3	3	3	2	2	0	2
ANLN	Actin-binding protein anillin	Q9NQW6-2;Q9NQW6;H7C1K5;H7C1C2;H7C3S1	Q9NQW6-2;Q9NQW6;H7C1K5	-0.248431	-0.359996	1.86132	0					0.575174	0.613417	0.07879	0.5	NaN	1.23107	-0.272407	2.16911	NaN	NaN	-0.226665	NaN	0	1	0	0	1	1	0	0	0	1	0	0	1	0	0	0
ANO10	Anoctamin-10	Q9NW15-2;Q9NW15;Q9NW15-5;Q9NW15-3;C9IYD3;C9JQC9;C9JPY2;C9J670;Q9NW15-4;C9IZD0;C9JA49;C9JH90;H7C3N6	Q9NW15-2;Q9NW15;Q9NW15-5;Q9NW15-3;C9IYD3;C9JQC9;C9JPY2;C9J670;Q9NW15-4	3.03723	2.80184	-0.0970906	0	+	+			0.010238	0.0124375	0.529383	0.5	-0.685283	-0.746497	NaN	NaN	-0.490631	-0.225448	NaN	NaN	1	1	1	1	0	0	0	0	0	0	1	1	0	0	0	0
ANXA1	Annexin A1	P04083;Q5T3N1;Q5T3N0	P04083;Q5T3N1	0.947032	0.415759	0.715506	0.930228					0.234957	0.369611	0.293473	0.158655	-0.486236	-0.324109	-0.338032	0.0799983	-0.506132	-0.239422	-0.257438	0.0660045	13	14	17	18	7	6	9	8	6	14	17	15	6	6	4	7
ANXA11	Annexin A11	P50995-2;P50995;H0Y6E1	P50995-2;P50995	1.03903	-0.48165	-0.0970906	0.566704					0.213943	0.650119	0.529383	0.271193	-0.619507	-0.420921	0.232924	-0.73323	-0.716555	-0.277757	NaN	-1.02269	4	5	5	5	0	0	0	2	2	3	3	5	0	0	0	0
ANXA2	Annexin A2;Annexin	P07355;P07355-2;H0YN42;H0YMD0;H0YMU9;H0YM50;H0YKS4;H0YNP5;H0YN28;H0YL33;H0YMM1;H0YNA0;H0YKZ7;H0YLV6;H0YMT9;H0YKX9;H0YKL9;H0YMW4;H0YN52;H0YKV8;H0YMD9;H0YNB8;H0YKN4;H0YLE2	P07355;P07355-2;H0YN42;H0YMD0;H0YMU9;H0YM50;H0YKS4;H0YNP5;H0YN28;H0YL33	0.156415	-0.106207	-0.155212	-0.0361119					0.452499	0.533884	0.546906	0.515483	-0.393595	-0.31792	-0.540745	0.472825	-0.477798	-0.271267	-0.483139	0.519455	27	28	29	27	23	21	19	25	29	27	27	27	22	19	21	21
ANXA4	Annexin A4;Annexin	P09525;P09525-2;Q6P452	P09525;P09525-2;Q6P452	-0.234125	1.91771	-0.0970906	0					0.570892	0.0623374	0.529383	0.5	-1.56877	-1.10126	-0.607765	-0.102497	NaN	-0.266636	NaN	NaN	1	0	3	1	0	0	0	0	0	1	0	0	0	0	0	0
ANXA5	Annexin A5;Annexin	P08758;D6RBL5;D6RBE9;E9PHT9;D6RCN3	P08758;D6RBL5;D6RBE9;E9PHT9	-0.266533	-0.00495329	0.181961	0.618514					0.580578	0.501582	0.445057	0.253055	-1.0735	-0.841017	-0.278703	-0.291895	-1.02282	-0.761364	-0.161326	-0.36315	11	9	15	12	5	5	4	6	6	11	14	12	5	5	4	6
ANXA6	Annexin A6;Annexin	P08133;P08133-2;E7EMC6;E5RK63;E5RJF5;E5RI05;E5RFF0;E5RJR0;E5RIU8	P08133;P08133-2;E7EMC6	0.170825	0.43981	0.0888573	0.528551					0.448147	0.362366	0.473105	0.284951	-1.11971	-0.62142	-0.0690079	-0.154969	-1.3063	-0.645675	0.224173	-0.454408	12	7	20	16	4	6	5	5	10	9	16	13	2	5	3	8
ANXA7	Annexin A7	P20073-2;P20073	P20073-2;P20073	-0.297519	1.75234	-0.0970906	0					0.589795	0.0803027	0.529383	0.5	-0.482537	-0.173874	NaN	0.216111	NaN	-0.581348	NaN	NaN	0	0	3	1	1	0	0	0	0	0	1	1	0	1	0	0
AP1B1	AP-1 complex subunit beta-1	Q10567-4;Q10567-3;Q10567-2;Q10567;C9J1E7	Q10567-4;Q10567-3;Q10567-2;Q10567;C9J1E7	-1.49148	-0.881793	-0.68296	0.566704					0.87245	0.759913	0.697965	0.271193	-0.193952	-0.0949452	0.320611	NaN	-0.498308	-0.612247	NaN	NaN	2	2	3	0	0	0	0	1	1	1	2	1	1	1	0	1
AP1G1	AP-1 complex subunit gamma-1	O43747;O43747-2;B3KNW1;H3BRM7;H3BN71;B4DGE1;H3BR36;H3BUN9;H3BNR4	O43747;O43747-2	-1.24843	0.866403	0.930894	-2.18183					0.829603	0.243935	0.239843	0.990499	-0.381493	-0.272172	-0.0858652	0.118296	-0.286906	-0.246737	-0.253918	NaN	1	2	3	2	2	2	2	1	1	2	3	2	1	1	1	3
AP1M1	AP-1 complex subunit mu-1	Q9BXS5;Q9BXS5-2;K7EJL1;E7ENJ6;K7EPJ8;A0A087WZX7;K7ENA7;K7EQX3;Q9Y6Q5-2;K7ER75;K7EMG5;K7EK69;K7EQ90;K7ERH5;K7EL08	Q9BXS5;Q9BXS5-2;K7EJL1;E7ENJ6	-2.57561	-1.22277	-3.41956	-0.593964					0.975309	0.836218	0.99529	0.738431	-0.174475	-0.165573	-0.177993	0.345931	NaN	-0.403416	NaN	0.220436	1	0	2	2	1	0	4	5	1	3	4	2	5	3	4	7
AP2A1	AP-2 complex subunit alpha-1	O95782-2;O95782	O95782-2;O95782	-0.200726	-0.452091	-0.412628	-0.200717					0.560864	0.641314	0.622973	0.585417	-0.692457	-0.404033	-0.308005	-0.169628	-0.744807	-0.456461	-0.354402	-0.112871	17	20	19	20	12	12	9	12	17	18	23	20	10	12	11	13
AP2A2	AP-2 complex subunit alpha-2	O94973;O94973-2;O94973-3;E9PR62;E9PNC4;H0YEG0;H0YDE9;E9PQP4;M0R2D9;E9PPZ3;E9PS94;E9PPY8	O94973;O94973-2;O94973-3	-1.23412	-1.08015	-0.0791493	1.28889					0.826822	0.806436	0.523961	0.0829392	-0.53809	-0.115831	-0.186572	-0.134916	NaN	-0.245273	-0.442419	NaN	1	0	3	5	1	1	0	2	1	2	6	5	1	1	0	0
AP2B1	AP-2 complex subunit beta	P63010;P63010-2;P63010-3;A0A087X253;A0A087WU93;A0A087WZQ6;A0A087WYD1;K7ERB2;K7EN71;K7EJ01;K7EJX1;H7C034;A0A087WXS3;K7EKZ5	P63010;P63010-2;P63010-3;A0A087X253;A0A087WU93;A0A087WZQ6;A0A087WYD1	-0.329163	-0.485311	-0.0320933	-0.687037					0.599156	0.651204	0.50972	0.769916	-0.489599	-0.280851	-0.249342	-0.0671616	-0.864477	-0.389423	-0.349838	-0.0625393	12	14	19	18	8	8	7	6	17	15	23	22	8	10	5	10
AP2M1	AP-2 complex subunit mu	Q96CW1-2;A0A087WY71;Q96CW1;E9PFW3;C9JJ47;C9JTK4;C9JGT8;C9JJD3;C9JPV8;H7C4C3	Q96CW1-2;A0A087WY71;Q96CW1;E9PFW3;C9JJ47	0.109642	0.352002	-0.681145	-0.491009					0.466663	0.389035	0.697484	0.701194	-0.563755	-0.373196	-0.365395	0.00339063	-0.854724	-0.2283	-0.431605	-0.0483025	2	3	6	5	8	8	9	5	2	3	4	4	3	8	5	6
AP2S1	AP-2 complex subunit sigma	M0QYZ2;P53680;M0R0N4;P53680-2;M0QZ21;X6R390;M0R1S0	M0QYZ2;P53680;M0R0N4;P53680-2;M0QZ21;X6R390	-0.411257	0.127397	0.0231317	0.409606					0.623165	0.459377	0.492994	0.32985	-0.430338	-0.289627	-0.315245	-0.044783	-0.553821	-0.127475	-0.326335	-0.127679	1	2	4	4	4	5	3	4	3	1	2	2	5	4	2	2
AP3B1	AP-3 complex subunit beta-1	O00203-3;O00203;Q13367;Q13367-4;H0YBD0;F5GWU4;Q13367-3;F5GYB0	O00203-3;O00203	-1.90793	-0.626451	2.11445	0.678062					0.927278	0.692018	0.0541969	0.233025	-0.864428	-0.600445	0.165826	-0.518274	-0.84538	-0.651137	-0.22695	-0.70655	1	2	8	5	3	3	3	2	3	2	7	8	2	3	1	3
AP3D1	AP-3 complex subunit delta-1	O14617;O14617-5;O14617-4;O14617-2;O14617-3;A0A087WYN6;K7ELX8;K7ERW8	O14617;O14617-5;O14617-4;O14617-2;O14617-3	-1.63449	0.141613	2.55153	4.42563			+	+	0.893833	0.454863	0.0263528	9.8e-07	-0.718866	-0.547014	0.035325	-0.447986	-0.874239	-0.701071	0.12741	-0.86347	1	2	4	5	4	4	7	7	2	3	4	3	1	2	0	1
AP3M1	AP-3 complex subunit mu-1	Q9Y2T2;E5RJ52;P53677;H0YBM0;H0YBA0;E7ER80;P53677-2	Q9Y2T2	-1.74049	0.0557424	-0.1315	-1.08606					0.90792	0.482201	0.539766	0.8785	-0.771088	-0.499284	0.177516	-0.426481	-0.0508075	-0.526711	-0.0502453	-0.693453	1	2	7	4	5	3	3	1	0	5	4	4	2	4	2	2
AP3S1	AP-3 complex subunit sigma-1	Q92572;F5H459	Q92572	0.970229	-0.501219	1.17702	0.110491					0.229553	0.655904	0.185745	0.452726	-0.820292	-0.286848	-0.575093	-0.0162525	-0.630354	-0.382271	0.0590449	-0.27113	4	4	4	3	4	4	5	4	0	3	4	3	4	2	1	6
APBA3	Amyloid beta A4 precursor protein-binding family A member 3	O96018	O96018	-0.297519	-0.359996	3.86132	3.89596			+	+	0.589795	0.613417	0.00168494	1.41e-05	NaN	NaN	NaN	NaN	NaN	NaN	-0.084526	-0.215902	0	0	0	0	2	2	3	2	0	0	0	0	1	0	0	0
APEX1	DNA-(apurinic or apyrimidinic site) lyase;DNA-(apurinic or apyrimidinic site) lyase, mitochondrial	P27695;G3V3M6;G3V5Q1;G3V3C7;A0A0C4DGK8;G3V5D9;G3V5M0;G3V359;H7C4A8;G3V2D9;G3V3Y6	P27695;G3V3M6;G3V5Q1;G3V3C7;A0A0C4DGK8;G3V5D9	0.418636	0.124896	-0.249268	0.504661					0.374699	0.460172	0.575057	0.293732	0.69836	0.620478	0.0550795	0.315036	0.379154	0.530377	0.0835615	0.236619	8	7	13	9	11	11	8	9	6	7	11	10	12	12	8	9
API5	Apoptosis inhibitor 5	Q9BZZ5-2;G3V1C3;Q9BZZ5;Q9BZZ5-3;Q9BZZ5-5;Q9BZZ5-6;Q9BZZ5-1;H0YER7;E9PQK6	Q9BZZ5-2;G3V1C3;Q9BZZ5;Q9BZZ5-3;Q9BZZ5-5;Q9BZZ5-6;Q9BZZ5-1;H0YER7	0.574998	0.436619	0.902909	0					0.330424	0.363325	0.246495	0.5	0.690297	0.760686	0.0454838	0.428782	0.804596	0.859986	NaN	NaN	2	3	8	5	1	1	1	0	2	2	3	6	0	0	0	0
APOA1	Apolipoprotein A-I;Truncated apolipoprotein A-I	F8W696;P02647	F8W696;P02647	2.87002	2.43695	1.90291	1	+	+			0.0142648	0.0255176	0.0742517	0.141186	NaN	NaN	NaN	NaN	NaN	NaN	-3.69354	NaN	1	2	1	1	1	2	1	1	0	0	0	0	0	0	0	0
APOBEC3C	DNA dC->dU-editing enzyme APOBEC-3C	Q9NRW3;A0A087WX48;Q8IUX4	Q9NRW3	1.37669	0.683273	-0.123777	-0.475236					0.146753	0.292164	0.537438	0.695283	-1.10956	-0.829967	-0.400129	-0.521255	-0.909722	-0.86858	-0.625841	-0.454641	1	4	4	3	2	1	3	2	2	2	2	2	2	2	2	3
ARCN1	Coatomer subunit delta	P48444;B0YIW6;P48444-2;Q6P1Q5;E9PK34	P48444;B0YIW6;P48444-2	-0.313387	-0.141617	-0.0413006	-0.0793994					0.594496	0.545138	0.512508	0.53401	-0.572094	-0.578881	-0.0342537	-0.383993	-0.747876	-0.65287	-0.0947942	-0.30678	7	6	11	9	10	10	6	8	8	7	12	9	8	11	8	13
ARF1;ARF3	ADP-ribosylation factor 1;ADP-ribosylation factor 3	P84077;P61204;F5H423;P61204-2;F5H0C7;H0YGG7	P84077;P61204;F5H423;P61204-2	0.360399	0.0418236	-0.088311	0.153428					0.391659	0.486643	0.52673	0.434497	-0.324521	-0.311733	-0.0856889	-0.033801	-0.169314	-0.20347	-0.0989103	-0.0269	9	7	9	9	6	7	8	8	7	7	7	8	6	6	8	8
ARF4	ADP-ribosylation factor 4	P18085;C9JPM4;C9JAK5;U3KQF2;F5H1V1;F5H6T5;F8WDB3	P18085;C9JPM4;C9JAK5	-0.0112811	-0.187478	0.0125714	0.439213					0.503434	0.55966	0.496192	0.318407	-0.700743	-0.674905	-0.00158841	-0.422192	-0.603999	-0.664319	0.036917	-0.482001	5	6	5	6	5	6	6	6	5	5	5	5	6	5	5	5
ARF5	ADP-ribosylation factor 5	P84085;C9J1Z8	P84085;C9J1Z8	-0.344531	0.606789	-0.0970906	0					0.603682	0.313542	0.529383	0.5	NaN	0.0956848	NaN	NaN	0.0958813	-0.344442	NaN	NaN	1	1	4	2	0	0	0	0	1	0	1	1	0	0	0	0
ARF6	ADP-ribosylation factor 6	P62330	P62330	-0.585955	1.60325	0.460278	0.0734376					0.6726	0.0996297	0.363365	0.468538	-0.395314	-0.570264	NaN	-0.625977	-0.937796	-0.49764	NaN	NaN	2	1	3	1	1	0	0	1	2	2	1	1	0	0	0	1
ARFGAP3	ADP-ribosylation factor GTPase-activating protein 3	B0QYV8;Q9NP61-2;Q9NP61;B0QYV9	B0QYV8;Q9NP61-2;Q9NP61;B0QYV9	-0.297519	0.272607	0.930894	1.28889					0.589795	0.413611	0.239843	0.0829392	-0.363095	-0.709449	0.0589211	NaN	NaN	-0.667801	-0.0532543	NaN	0	0	1	1	1	1	0	1	0	0	1	1	1	1	0	0
ARG1	Arginase-1	P05089;P05089-2;P05089-3	P05089;P05089-2;P05089-3	-0.297519	-1.12653	-1.13936	2.21165				+	0.589795	0.816464	0.806506	0.00871433	-0.344679	NaN	NaN	NaN	NaN	NaN	-3.50608	-4.00903	1	0	2	0	2	1	4	0	0	1	4	1	4	3	0	0
ARGLU1	Arginine and glutamate-rich protein 1	Q9NWB6;Q9NWB6-3;Q9NWB6-2;X6R9F1	Q9NWB6;Q9NWB6-3;Q9NWB6-2	1.64833	0.0866263	-0.0970906	0					0.104244	0.472352	0.529383	0.5	0.111056	0.1236	-0.0563564	-0.483943	0.0595424	0.290135	NaN	NaN	1	1	2	1	0	0	0	0	1	1	1	1	0	0	0	0
ARHGAP1	Rho GTPase-activating protein 1	Q07960;H0YE29;E9PNR6	Q07960;H0YE29;E9PNR6	3.80713	4.14753	2.92326	3.45447	+	+	+	+	0.00183641	0.000448827	0.0132239	0.000102174	-0.335922	-1.34286	-0.121882	-0.639966	-1.00894	-0.882357	1.37353	-0.885144	9	5	11	8	2	3	3	4	1	0	1	0	0	0	0	0
ARHGDIA	Rho GDP-dissociation inhibitor 1	J3KTF8;P52565;J3QQX2;J3KRE2;P52565-2;J3KRY1;J3KS60	J3KTF8;P52565;J3QQX2;J3KRE2;P52565-2;J3KRY1	1.59998	-0.262676	-0.0314563	-0.164672					0.111073	0.583289	0.509527	0.570255	0.0328627	0.0794992	0.206248	0.049763	-0.0419938	0.158291	0.267778	-0.0201742	3	3	5	4	4	4	4	5	4	3	5	3	5	4	6	6
ARHGEF17	Rho guanine nucleotide exchange factor 17	Q96PE2	Q96PE2	-0.297519	-0.352811	-1.16141	-0.310286					0.589795	0.611214	0.811067	0.630644	1.14822	-1.09234	1.84403	-0.379484	NaN	NaN	-0.59482	2.52861	0	0	1	0	2	0	1	1	0	0	1	0	1	1	1	1
ARHGEF2	Rho guanine nucleotide exchange factor 2	Q92974-3;Q92974-2;Q92974;V9GYM8;V9GZ14;V9GYF5;V9GYG5;Q5VY93;V9GZ58	Q92974-3;Q92974-2;Q92974;V9GYM8	2.53253	0.384317	1.51495	1	+				0.0266548	0.379152	0.125017	0.141186	0.743458	0.245008	-0.251336	0.295768	0.417943	0.0893059	-0.000163485	NaN	5	4	7	3	1	2	1	1	2	2	5	1	0	0	0	0
ARHGEF7	Rho guanine nucleotide exchange factor 7	Q14155-2;Q14155-3;Q14155;E7ENL8	Q14155-2;Q14155-3;Q14155;E7ENL8	0.508524	-3.36	2.00761	0.506734					0.349	0.99643	0.0637128	0.292966	NaN	NaN	NaN	NaN	NaN	NaN	0.42026	0.468206	1	0	0	0	2	0	1	1	0	1	3	2	0	0	0	1
ARL1	ADP-ribosylation factor-like protein 1	P40616-2;P40616;F8VYN9;B4DZG7;F8VP99;F8VP63	P40616-2;P40616;F8VYN9;B4DZG7	1.24519	0.762999	0.876223	0.0734376					0.171024	0.270631	0.25293	0.468538	-0.826907	-0.870969	-0.204347	-0.19029	-1.40279	-1.13468	-0.247714	NaN	2	2	2	2	1	1	1	1	1	2	2	2	0	1	1	1
ARL2	ADP-ribosylation factor-like protein 2	P36404;V9GYD0;P36404-2	P36404;V9GYD0;P36404-2	0.641163	1.94734	-0.0970906	0.566704					0.312339	0.0594782	0.529383	0.271193	1.6734	-0.471909	-0.0949446	NaN	-0.0478703	-0.235002	NaN	NaN	1	2	2	2	0	0	0	1	1	0	0	1	0	0	0	0
ARL3	ADP-ribosylation factor-like protein 3	P36405	P36405	1.01148	1.75234	-0.0970906	0					0.220119	0.0803027	0.529383	0.5	-0.406588	-0.226998	-0.32753	0.296474	0.0721195	-0.0611325	NaN	NaN	0	3	3	2	0	0	0	0	0	0	1	1	0	0	1	0
ARMC9	LisH domain-containing protein ARMC9	Q7Z3E5-2;Q7Z3E5;A0A087X1I8;H7C3U7;H7BZY2;C9J535;C9JW07;H7BZA2	Q7Z3E5-2;Q7Z3E5;A0A087X1I8;H7C3U7;H7BZY2	-0.297519	0.84118	-0.0970906	0					0.589795	0.250313	0.529383	0.5	-1.17744	-1.63671	NaN	NaN	NaN	-1.63931	NaN	NaN	0	0	3	0	0	0	0	0	0	0	1	0	0	0	0	0
ARPC1A	Actin-related protein 2/3 complex subunit 1A	Q92747;E9PF58;Q92747-2;F8WFD3	Q92747;E9PF58;Q92747-2	0.173778	-1.18007	-0.623425	-1.38319					0.447256	0.82763	0.682019	0.931484	-0.48647	-0.434451	-0.0769891	0.00557243	-0.888928	-0.87017	-0.436058	NaN	1	2	3	1	4	2	1	0	1	1	4	1	4	3	4	0
ARPC1B	Actin-related protein 2/3 complex subunit 1B	O15143;C9J4Z7;F8VXW2;C9JEY1;C9JQM8;C9JFG9;C9J6C8;C9JBJ7;C9K057;C9JTT6;C9JM51;F8WEB3	O15143	1.37981	-0.208833	0.355548	1.84572				+	0.146206	0.566396	0.393595	0.0236191	-0.656796	-0.545341	-0.0868821	-0.346613	-0.884737	-0.911616	-0.17428	-0.276047	6	4	4	8	5	3	3	0	1	2	7	7	3	3	1	0
ARPC2	Actin-related protein 2/3 complex subunit 2	O15144;H7C3F9;C9JTV5;G5E9J0;G5E9S7	O15144	-0.150508	-0.0774441	0.00819795	-0.248213					0.545715	0.524721	0.497517	0.6052	-0.665874	-0.41828	-0.0587692	-0.0979994	-0.780267	-0.431399	-0.128046	-0.145959	11	12	14	13	12	12	14	14	9	11	15	13	12	11	14	14
ARPC3	Actin-related protein 2/3 complex subunit 3	O15145;C9JZD1;F8VR50	O15145	-0.248431	-0.262859	0.366923	0.51841					0.575174	0.583346	0.390277	0.288663	-0.669595	-0.571918	-0.111039	-0.0880163	-0.65602	-0.471886	-0.0440158	-0.135329	4	4	4	4	3	4	4	4	4	4	5	5	2	2	3	4
ARPC4;ARPC4-TTLL3	Actin-related protein 2/3 complex subunit 4	P59998;F8WCF6;F8WDD7;P59998-3;P59998-2;A0A0A6YYG9;H7C0A3;F8WE39;F8WDW3;R4GN08;P59998-4	P59998;F8WCF6;F8WDD7;P59998-3;P59998-2;A0A0A6YYG9;H7C0A3	-0.546452	0.0651184	0.231071	0.136628					0.661647	0.479209	0.430364	0.441615	-0.612587	-0.497838	-0.107079	-0.171723	-0.606865	-0.529963	-0.0716758	-0.209242	5	6	6	6	6	6	6	6	5	6	6	6	6	6	6	6
ARPC5	Actin-related protein 2/3 complex subunit 5	O15511;B1ALC0;O15511-2	O15511;B1ALC0;O15511-2	0.381001	-0.362992	0.902909	-0.179908					0.385634	0.614335	0.246495	0.576678	-0.380282	-0.531665	-0.12548	-0.195369	-0.884367	-0.291917	-0.258913	0.174678	1	3	1	2	1	1	1	1	1	1	2	1	1	0	1	1
ASCC3	Activating signal cointegrator 1 complex subunit 3	Q8N3C0;Q8N3C0-4	Q8N3C0	-0.297519	-0.0988015	0.0513419	0.872536					0.589795	0.531526	0.484452	0.174127	-0.727509	-0.689604	-0.269137	-0.264925	NaN	-0.785383	-0.182417	-0.355504	0	0	1	3	5	7	5	2	0	0	2	1	6	7	5	3
ASNS	Asparagine synthetase [glutamine-hydrolyzing]	P08243-2;P08243;P08243-3;F8WEJ5;C9J057;C9JT45;C9JM09;C9JLN6	P08243-2;P08243;P08243-3;F8WEJ5	0.156308	-0.0328493	0.0117171	1.30733					0.452531	0.510492	0.496451	0.0799537	1.72377	0.959264	-0.71792	0.661421	1.35695	0.92375	-0.601815	0.749249	8	9	6	5	4	7	3	4	2	6	5	5	3	5	1	6
ASPH	Aspartyl/asparaginyl beta-hydroxylase	Q12797;Q12797-10;E5RHK2;A0A087WW51;A0A087WUJ2;E5RG29;Q12797-9;Q12797-5;Q12797-8	Q12797;Q12797-10	-1.47282	-0.521817	-0.703411	-1.00343					0.869454	0.661954	0.703359	0.859637	-1.10193	-1.08861	0.402276	-1.07317	-0.779851	-1.21595	0.17369	-1.43101	3	6	14	9	2	4	6	6	5	6	13	13	7	2	7	9
ATAD2	ATPase family AAA domain-containing protein 2	Q6PL18;A0A0B4J211;Q6PL18-2;Q9ULI0-2;Q9ULI0	Q6PL18;A0A0B4J211	-0.297519	-0.359996	5.41107	0.566704			+		0.589795	0.613417	1.99e-05	0.271193	NaN	NaN	-0.351744	NaN	NaN	NaN	-0.40371	NaN	0	0	0	0	12	14	0	1	0	0	0	0	0	0	0	0
ATAD3A	ATPase family AAA domain-containing protein 3A	Q9NVI7-2;Q9NVI7;Q9NVI7-3;H0Y2W2;Q5SV16;Q5T9A4-2	Q9NVI7-2;Q9NVI7;Q9NVI7-3;H0Y2W2	-2.82622	-0.908502	-0.0970906	0					0.984478	0.766511	0.529383	0.5	-0.143686	0.0419978	0.284582	NaN	NaN	-0.243986	NaN	NaN	0	0	1	0	0	0	0	0	1	3	2	1	0	0	0	0
ATG7	Ubiquitin-like modifier-activating enzyme ATG7	O95352;O95352-3;O95352-2;C9JFF4;C9J415;H7C369;H7C2R3;H7BZ92;H7C059;C9JE55;H7C2J8	O95352;O95352-3;O95352-2	-1.38941	-1.91337	-0.860016	-1					0.855467	0.937235	0.743119	0.858814	0.631457	NaN	NaN	NaN	NaN	NaN	NaN	NaN	1	0	0	1	1	1	0	0	0	2	2	2	1	1	1	1
ATIC	Bifunctional purine biosynthesis protein PURH;Phosphoribosylaminoimidazolecarboxamide formyltransferase;IMP cyclohydrolase	P31939;P31939-2;H7C1S2;C9JLK0;F8WEF0	P31939;P31939-2	-0.198916	0.18252	-0.0970906	-1.64447					0.56032	0.441906	0.529383	0.961454	-0.236158	-0.242223	0.862116	-1.15325	-0.343504	-0.205766	NaN	-0.0929405	3	3	7	4	0	0	1	1	1	4	8	7	0	0	3	4
ATP1A1	Sodium/potassium-transporting ATPase subunit alpha-1	P05023-3;P05023-4;P05023;P05023-2;M0R116;P13637;P13637-3;A0A0A0MT26;H0Y7C1;Q5TC01;E9PRA5;P20648;Q5TC02;M0QXF2;P54707;P54707-2	P05023-3;P05023-4;P05023;P05023-2	-0.297519	-0.359996	1.86132	0.602993					0.589795	0.613417	0.07879	0.258421	-0.282767	-0.233623	-0.373039	0.413122	NaN	NaN	-0.151053	NaN	1	0	0	0	2	2	1	0	0	0	0	0	0	0	0	1
ATP2A2	Sarcoplasmic/endoplasmic reticulum calcium ATPase 2	P16615;P16615-5;P16615-2;P16615-3;P16615-4;H7C5W9;O14983-2;O14983;O14983-3;H3BVB2;A0A0C4DH86;J3QSY6;H3BTW4	P16615;P16615-5;P16615-2;P16615-3;P16615-4;H7C5W9	2.52475	-0.909322	0.803196	-0.390115	+				0.0270226	0.766713	0.270981	0.662529	-0.17348	-0.379006	0.244806	-0.446105	-0.028983	-0.517352	0.302906	-0.575889	6	5	5	6	9	12	8	2	3	7	11	7	6	10	8	1
ATP5A1	ATP synthase subunit alpha, mitochondrial	P25705-2;P25705;P25705-3;K7EK77;K7ENJ4;K7ERX7;K7EJP1;K7EQH4;K7ESA0	P25705-2;P25705;P25705-3	0.344359	-0.204915	0.460278	-0.493266					0.396368	0.565161	0.363365	0.702036	-0.256053	-0.451366	-0.15706	-0.529648	-0.346422	-0.474566	-0.649218	NaN	3	6	11	6	1	0	0	0	1	7	14	6	1	1	0	1
ATP5B	ATP synthase subunit beta, mitochondrial;ATP synthase subunit beta	P06576;H0YH81;F8W079;F8W0P7;H0YI37	P06576;H0YH81;F8W079	0.185017	-0.511516	-0.0970906	-1.60319					0.443866	0.658933	0.529383	0.957595	-0.152522	-0.42111	-0.102088	-0.420255	-0.35686	-0.518351	NaN	-0.224074	2	5	9	6	0	0	1	2	0	7	11	4	0	0	0	1
ATP5C1	ATP synthase subunit gamma, mitochondrial	P36542-2	P36542-2	-0.207551	-0.345339	-0.0970906	0					0.562917	0.608918	0.529383	0.5	-0.409404	-0.754582	NaN	NaN	0.0596824	-0.521132	NaN	NaN	0	2	4	1	0	0	0	0	0	1	4	1	0	0	0	0
ATP5J2;PTCD1;ATP5J2-PTCD1	ATP synthase subunit f, mitochondrial	P56134-3;P56134;P56134-4;C9JJT5;P56134-2;C9JU26;G3V325	P56134-3;P56134;P56134-4;C9JJT5;P56134-2;C9JU26;G3V325	-0.297519	1.39456	-0.0970906	0					0.589795	0.132088	0.529383	0.5	-0.25422	-0.511501	NaN	NaN	NaN	-0.371154	NaN	NaN	0	0	3	1	0	0	0	0	0	0	1	1	0	0	0	0
ATP5O	ATP synthase subunit O, mitochondrial	P48047;H7C0C1;H7C086;H7C068	P48047;H7C0C1	-0.938754	-1.46292	-0.0970906	0					0.763098	0.879263	0.529383	0.5	-0.345868	-0.611756	NaN	NaN	NaN	-0.542868	NaN	NaN	0	1	2	0	0	0	0	0	0	1	2	0	0	0	0	0
ATP6V0D1	V-type proton ATPase subunit d 1	J3QL14;R4GN72;P61421;F5GYQ1;H3BQJ1	J3QL14;R4GN72;P61421;F5GYQ1	-0.179452	-1.62456	-0.0709213	-0.493266					0.554456	0.903325	0.521472	0.702036	0.260024	NaN	NaN	NaN	-0.784164	NaN	NaN	NaN	0	3	1	1	0	1	0	0	0	2	3	1	1	0	0	1
ATXN10	Ataxin-10	Q9UBB4;Q9UBB4-2;B1AHE4	Q9UBB4;Q9UBB4-2	0.294579	2.91771	0.460278	0		+			0.411077	0.00974276	0.363365	0.5	-0.325274	-0.451164	-0.0531406	-0.318352	-0.668608	-0.618088	NaN	NaN	2	0	6	2	1	0	0	0	0	0	0	0	0	0	0	0
AZGP1	Zinc-alpha-2-glycoprotein	P25311;C9JEV0;H7BZJ8	P25311;C9JEV0	-1.71549	-1.42284	-1.09845	0					0.90473	0.872694	0.797868	0.5	NaN	NaN	-2.0563	NaN	NaN	NaN	-0.981986	NaN	0	0	1	0	2	2	0	0	2	0	1	2	4	2	0	0
BAG2	BAG family molecular chaperone regulator 2	O95816;O95816-2	O95816;O95816-2	0.280273	-0.920153	-0.0970906	0.109726					0.415329	0.769358	0.529383	0.453051	-0.589423	-0.907196	1.1215	-0.650486	NaN	-0.848827	NaN	-1.34299	1	1	5	2	0	1	2	1	1	1	6	1	0	0	0	1
BAG3	BAG family molecular chaperone regulator 3	O95817;C9JFK9	O95817;C9JFK9	-0.297519	1.39456	-0.0970906	0					0.589795	0.132088	0.529383	0.5	-1.36932	-1.62385	NaN	NaN	NaN	NaN	NaN	NaN	0	0	2	0	0	0	0	0	0	0	0	0	0	0	0	0
BANF1	Barrier-to-autointegration factor;Barrier-to-autointegration factor, N-terminally processed	O75531	O75531	-0.459745	-0.625906	0.402935	0.4726					0.637131	0.691864	0.379825	0.30571	0.55919	0.362486	-0.286338	0.178249	0.882609	0.44561	-0.344357	0.116548	3	0	2	2	1	1	2	2	3	2	2	2	0	2	1	1
BCLAF1	Bcl-2-associated transcription factor 1	Q9NYF8-2;Q9NYF8;E9PK09;E9PQN2;E9PKI6;Q9NYF8-3;E9PK91;Q9NYF8-4;E9PJA7;H0YF00;H0YF14	Q9NYF8-2;Q9NYF8;E9PK09;E9PQN2;E9PKI6;Q9NYF8-3;E9PK91;Q9NYF8-4	3.87689	1.66764	4.38671	1.70169	+		+	+	0.00154721	0.0909017	0.000433083	0.0336752	0.485293	0.489692	-0.060015	0.149651	-0.00399726	0.433081	-0.184934	-0.293628	13	11	8	7	4	2	2	3	2	1	4	4	0	0	1	1
BLMH	Bleomycin hydrolase	K7ESE8;J3KSD8;Q13867;K7ES02	K7ESE8;J3KSD8;Q13867;K7ES02	-1.71549	0.647189	-0.0691062	1.35422					0.90473	0.302166	0.520923	0.0727244	NaN	0.107915	NaN	NaN	NaN	0.800428	NaN	-3.2442	0	0	1	1	0	1	2	0	2	0	1	1	0	1	0	0
BLVRA	Biliverdin reductase A	P53004;C9J1E1	P53004	0.592	-0.700062	0.31704	0.631404					0.325737	0.712436	0.404886	0.248644	-0.6613	-0.257115	-0.116982	0.113024	-0.527893	-0.131473	NaN	-0.112173	5	5	5	5	1	1	1	2	1	5	7	6	1	0	1	2
BNIP3L;BNIP3	BCL2/adenovirus E1B 19 kDa protein-interacting protein 3-like;BCL2/adenovirus E1B 19 kDa protein-interacting protein 3	O60238-2;H0YBC7;O60238;A0A087WVL5;B4DHJ7;Q12983	O60238-2;H0YBC7;O60238;A0A087WVL5;B4DHJ7;Q12983	-0.297519	2.64	-0.0970906	0		+			0.589795	0.0172679	0.529383	0.5	NaN	NaN	NaN	NaN	NaN	-1.1998	NaN	NaN	0	0	2	1	0	0	0	0	0	0	0	0	0	0	0	0
BOLA2;BOLA2B;LOC101060252	BolA-like protein 2	Q9H3K6;Q9H3K6-2;H3BV85;H3BTW0;A0A0B4J295;H3BVE0	Q9H3K6;Q9H3K6-2;H3BV85;H3BTW0;A0A0B4J295;H3BVE0	0.258371	0.310706	0.426048	0.493061					0.421857	0.401769	0.373162	0.298041	0.453718	0.252351	0.328033	0.091053	0.578502	0.361822	0.41177	0.358551	4	2	6	5	5	5	2	2	2	0	4	3	3	4	2	2
BPIFA1	BPI fold-containing family A member 1	Q9NP55-2;Q9NP55	Q9NP55-2;Q9NP55	-3.52411	-0.359996	-0.0970906	0					0.996417	0.613417	0.529383	0.5	NaN	NaN	NaN	NaN	NaN	NaN	NaN	NaN	0	0	0	0	0	0	0	0	5	0	0	0	0	0	0	0
BRIX1	Ribosome biogenesis protein BRX1 homolog	Q8TDN6	Q8TDN6	0.482772	-0.359996	-0.350887	0					0.356298	0.613417	0.605043	0.5	0.453753	0.36862	0.189778	-0.249827	0.708262	NaN	-0.238372	NaN	0	1	0	1	2	1	0	1	0	2	0	0	3	1	0	0
BTF3	Transcription factor BTF3	P20290-2;D6RDG3;H0Y9Y1	P20290-2;D6RDG3;H0Y9Y1	-0.297519	2.0795	-0.376376	0.0998287		+			0.589795	0.0479577	0.612475	0.457269	0.163834	-0.0750421	0.304302	-0.359246	NaN	0.152427	0.381481	-0.20619	1	0	3	3	1	1	2	2	0	0	2	3	1	1	1	2
BUB3	Mitotic checkpoint protein BUB3	O43684-2;O43684;J3QT28;J3QSX4	O43684-2;O43684;J3QT28	0.705335	0.270336	0.224521	0.362219					0.295221	0.414319	0.432319	0.348495	0.736809	0.710738	0.0420199	0.262221	0.713056	0.710591	0.100597	0.231284	6	6	4	7	10	10	6	6	5	5	5	6	9	8	3	5
BUD31	Protein BUD31 homolog	P41223;P41223-2;C9JNV2;C9JCD9;F8WCN7	P41223;P41223-2;C9JNV2	1.59782	0.602132	0.601881	0.332773					0.111385	0.314865	0.323837	0.360271	0.792161	0.718917	-0.131666	0.226117	1.11446	1.06586	0.0498174	0.78279	3	5	4	4	3	3	2	1	2	0	2	4	3	4	1	2
BZW1	Basic leucine zipper and W2 domain-containing protein 1	Q7L1Q6;Q7L1Q6-4;Q7L1Q6-3;Q7L1Q6-2;C9IZ80;C9JFN4;C9J188;C9JWF5;C9JV57;H0Y503	Q7L1Q6;Q7L1Q6-4;Q7L1Q6-3;Q7L1Q6-2;C9IZ80	1.02011	0.440866	-0.68296	-0.493266					0.218172	0.362049	0.697965	0.702036	0.178872	0.0708299	0.114983	0.160306	0.163104	0.00180488	NaN	NaN	5	5	4	6	1	0	0	0	2	3	5	5	1	2	0	1
C10orf112	MAM and LDL-receptor class A domain-containing protein C10orf112	Q5VYJ5;U5GXS0	Q5VYJ5;U5GXS0	-1.29752	-0.406114	0.902909	0					0.838926	0.62747	0.246495	0.5	-0.486277	-0.69546	1.62186	-0.762967	-0.510796	-0.156814	NaN	NaN	1	1	1	1	1	1	0	0	1	1	1	1	0	0	0	0
C14orf166	UPF0568 protein C14orf166	Q9Y224;G3V4C6;H0YJB9;G3V4E7	Q9Y224;G3V4C6	1.08879	0.123974	-0.0970906	0					0.203047	0.460465	0.529383	0.5	-0.0655912	-0.0101881	0.096879	0.00436122	-0.0283235	0.0201113	NaN	NaN	4	5	7	6	0	0	0	0	2	2	8	2	0	0	0	0
C16orf80	UPF0468 protein C16orf80	Q9Y6A4;H3BPA3	Q9Y6A4	0.965722	1.03882	0.514948	-0.000196233					0.230598	0.202777	0.347903	0.500084	0.338658	0.314119	NaN	0.295268	0.624261	0.483054	0.0263731	NaN	1	2	4	2	3	3	2	1	1	1	0	2	2	2	0	2
C19orf10	UPF0556 protein C19orf10	Q969H8;M0QXF7	Q969H8;M0QXF7	0.525083	-0.098776	0.903817	-0.355579					0.344336	0.531518	0.246278	0.648862	-1.11069	-0.762615	NaN	-0.910307	-2.33528	-1.02822	-0.297011	-1.56	2	1	2	2	1	2	2	1	1	1	1	1	1	2	1	2
C20orf27	UPF0687 protein C20orf27	Q9GZN8;Q9GZN8-2;H7BYU9	Q9GZN8;Q9GZN8-2;H7BYU9	0.163008	1.98738	0.318855	-0.54944					0.450507	0.0557797	0.404352	0.722623	0.239833	0.255008	0.359672	0.155284	0.04098	0.432778	-0.139818	-0.225213	1	1	3	2	1	2	1	1	1	1	0	1	1	1	1	2
C22orf28	tRNA-splicing ligase RtcB homolog	Q9Y3I0	Q9Y3I0	1.94218	0.550437	0.895403	1.25355					0.0691771	0.329709	0.248296	0.088898	0.0978515	0.0829224	0.0564407	-0.146479	-0.0915473	-0.0154764	0.0547721	-0.0707663	11	11	11	9	14	11	11	16	4	4	9	8	9	8	7	9
C3	Complement C3;Complement C3 beta chain;Complement C3 alpha chain;C3a anaphylatoxin;Acylation stimulating protein;Complement C3b alpha chain;Complement C3c alpha chain fragment 1;Complement C3dg fragment;Complement C3g fragment;Complement C3d fragment;Complement C3f fragment;Complement C3c alpha chain fragment 2	P01024	P01024	-1.46566	0.457691	0.399458	1					0.868291	0.357012	0.380831	0.141186	NaN	NaN	NaN	NaN	-2.46339	-2.16707	2.42805	NaN	2	0	2	1	2	1	1	1	2	2	1	1	2	2	0	0
C4A;C4B	Complement C4-A;Complement C4 beta chain;Complement C4-A alpha chain;C4a anaphylatoxin;C4b-A;C4d-A;Complement C4 gamma chain;Complement C4-B;Complement C4 beta chain;Complement C4-B alpha chain;C4a anaphylatoxin;C4b-B;C4d-B;Complement C4 gamma chain	P0C0L4-2;P0C0L4;F5GXS0;P0C0L5	P0C0L4-2;P0C0L4;F5GXS0;P0C0L5	-0.493584	0.58804	0.903298	0.506734					0.646773	0.318883	0.246402	0.292966	NaN	NaN	NaN	NaN	3.36361	2.7086	1.62309	NaN	4	2	4	4	3	2	1	1	3	1	2	3	2	1	0	1
C6orf10	Uncharacterized protein C6orf10	A0A087WYQ2;C9J9T8;E9PLW3;Q5SRN2-3;F8VVU2;Q5SRN2-2;Q5SRN2	A0A087WYQ2;C9J9T8;E9PLW3;Q5SRN2-3;F8VVU2;Q5SRN2-2;Q5SRN2	-0.557043	-2.40611	-0.68296	0					0.664597	0.972979	0.697965	0.5	-0.401697	NaN	NaN	NaN	-0.654928	0.166885	NaN	NaN	1	1	0	1	0	0	0	0	1	1	1	1	1	0	0	0
CACYBP	Calcyclin-binding protein	Q9HB71;Q9HB71-3;B2ZWH1;Q9HB71-2	Q9HB71;Q9HB71-3	-0.0149589	0.190894	0.85065	0.492591					0.504553	0.439261	0.259179	0.298216	0.927781	0.962641	0.255148	1.34457	1.27207	1.00858	0.29836	1.38708	2	4	5	7	6	8	2	6	2	4	6	6	3	5	3	4
CAD	CAD protein;Glutamine-dependent carbamoyl-phosphate synthase;Aspartate carbamoyltransferase;Dihydroorotase	F8VPD4;P27708;H7C2E4;H7C3Z5;H7BZB3;P31327-2;P31327;P31327-3	F8VPD4;P27708	-0.461038	-0.281243	0.323031	-0.222395					0.637501	0.589081	0.403123	0.594477	0.742691	0.43187	-0.12561	0.73686	0.399054	0.388833	-0.11546	0.60499	14	13	18	17	19	25	20	14	10	15	26	18	14	22	17	17
CALD1	Caldesmon	Q05682-5;Q05682-4;E7EX44;Q05682-3;Q05682-6;Q05682-2;Q05682;E9PGZ1;C9J813;C9JEK3;C9JE79;F8WE61;REV__H0YH95;REV__E9PJZ7;Q7Z7B0-3;REV__H0YHK3;A0A075B6G6;REV__O75334-6;REV__O75334-5;Q7Z7B0-2;Q7Z7B0;REV__O75334-2;REV__O75334-4;REV__G3V200;REV__O75334-3;REV__O75334	Q05682-5;Q05682-4;E7EX44;Q05682-3;Q05682-6;Q05682-2;Q05682;E9PGZ1;C9J813	0.677874	-0.0114626	0.824776	0.0707333					0.302494	0.503661	0.26558	0.469694	-1.40022	-0.996117	-1.25308	0.277586	-1.69023	-1.27099	-0.993115	0.175016	14	8	14	9	6	6	7	10	10	7	13	11	5	6	8	7
CALML5	Calmodulin-like protein 5	Q9NZT1	Q9NZT1	-0.297519	-0.913374	-1.34902	0					0.589795	0.767704	0.847149	0.5	NaN	NaN	NaN	NaN	NaN	NaN	NaN	NaN	0	0	0	0	1	0	0	0	0	0	1	0	3	0	0	0
CALR	Calreticulin	P27797;K7EJB9;K7EL50	P27797;K7EJB9	-0.505678	-0.931507	-0.550086	-1.14884					0.650196	0.772114	0.661905	0.891586	-1.37273	-1.44455	-0.383003	-1.10691	-1.42772	-0.961797	-0.339459	-1.07108	2	5	5	7	2	3	6	7	4	6	7	7	4	4	6	9
CALU	Calumenin	O43852;O43852-3;O43852-5;O43852-2;O43852-4;O43852-9;O43852-13;O43852-14;O43852-11;O43852-10;O43852-6;O43852-12;H0Y875;O43852-7;O43852-15;O43852-8	O43852;O43852-3;O43852-5;O43852-2;O43852-4;O43852-9;O43852-13;O43852-14;O43852-11;O43852-10;O43852-6	-0.297519	0.84118	-0.0970906	0					0.589795	0.250313	0.529383	0.5	-1.39713	-1.02627	NaN	-0.209135	NaN	-1.35348	NaN	NaN	0	1	1	0	0	0	0	0	0	0	1	0	0	0	0	0
CAMK2D	Calcium/calmodulin-dependent protein kinase type II subunit delta	Q13557-8;Q13557-10;D6R938;Q13557;E9PBG7;Q13557-6;Q13557-11;E9PF82;Q13557-12;Q13557-9;Q13557-5;Q13557-3;Q13557-4;H0Y9J2;Q13554-7;Q13554-4;Q13554-6;Q13554-3;Q13554-8;Q13554-5;Q13554-2;Q13554;H7BXS4;Q9UQM7;Q9UQM7-2;E9PBE8;E7EQE4;H7BZC6;D6RHX9;D6RFJ0;E7ERS6;E7ETC9	Q13557-8;Q13557-10;D6R938;Q13557;E9PBG7;Q13557-6;Q13557-11;E9PF82;Q13557-12;Q13557-9;Q13557-5;Q13557-3;Q13557-4	-0.790139	-0.372592	-0.612883	-0.547458					0.726714	0.617271	0.679159	0.721909	-1.33493	-1.26608	-0.913219	-0.470203	-1.78774	-1.27677	-0.992751	-0.583255	10	10	14	11	8	9	10	10	11	14	17	15	11	9	13	15
CAND1	Cullin-associated NEDD8-dissociated protein 1	Q86VP6;Q86VP6-2;A0A0C4DGH5;Q86VP6-3;H0YH27	Q86VP6;Q86VP6-2;A0A0C4DGH5	-0.00251889	0.136258	3.39185	1.54486			+	+	0.500767	0.456563	0.00500677	0.0483835	-0.0842932	0.0487173	-0.138411	0.300618	-0.0873966	0.0259569	-0.19837	0.0762249	7	11	16	12	7	9	5	10	8	5	15	9	4	1	2	7
CANX	Calnexin	P27824;P27824-2;P27824-3;D6RGY2;H0Y9Q7;D6RAU8;D6RB85;D6RDP7;D6RAQ8;D6RFL1;H0Y9H1;D6RHJ3;D6RD16	P27824;P27824-2;P27824-3	0.0286948	-0.500759	0.514948	0.288894					0.491266	0.655768	0.347903	0.378066	-0.499729	-0.716513	0.148185	-0.311698	-0.675204	-0.708628	-0.0362183	NaN	3	4	4	1	2	2	1	3	2	1	5	3	1	1	3	4
CAP1	Adenylyl cyclase-associated protein 1	Q01518;Q01518-2;Q5T0R1;Q5T0R7;Q5T0R6;Q5T0R5;Q5T0R4;Q5T0R3;Q5T0R2;Q5T0R9;Q5T0S3;Q5T0R8	Q01518;Q01518-2	-1.85463	0.003961	0.904544	-0.687263					0.921487	0.498735	0.246104	0.769989	-0.489372	-0.152313	0.143334	-0.0971066	-0.882987	-0.123601	0.127676	-0.0521864	1	3	3	6	3	3	2	3	3	3	6	4	1	3	3	6
CAPN1	Calpain-1 catalytic subunit	P07384;E9PL37;E9PRM1;E9PLX0;E9PJJ3;E9PLC9;E9PMC6;E9PJA6;E9PSA6;E9PQB3;E9PIA9	P07384	-0.794011	-0.0290349	-0.513866	-0.177115					0.727695	0.509273	0.651794	0.575502	-1.05524	-0.801496	NaN	-0.136359	-1.41909	-0.667408	-0.159175	0.261365	0	2	5	2	1	3	0	4	2	3	4	4	2	3	0	5
CAPN2	Calpain-2 catalytic subunit	P17655;P17655-2	P17655;P17655-2	-0.464036	-0.0984447	-1.41738	-0.54299					0.638359	0.531413	0.859079	0.720295	-0.59171	-0.430861	0.329879	-0.57424	-0.58672	-0.532902	NaN	-0.633207	3	4	8	6	1	1	1	3	3	5	8	6	1	1	1	4
CAPNS1	Calpain small subunit 1	P04632;K7ELJ7;A0A0C4DGQ5;K7EIV0;A0A075B7C0;U3KQE2;K7EM73;K7EKD8;U3KPR7;Q96L46;K7ES78;K7EMQ1	P04632;K7ELJ7;A0A0C4DGQ5;K7EIV0;A0A075B7C0;U3KQE2;K7EM73;K7EKD8;U3KPR7	0.482772	1.60325	-0.0970906	0.109726					0.356298	0.0996297	0.529383	0.453051	-0.882696	-0.475919	NaN	-0.401632	-0.723928	-0.0182444	NaN	NaN	0	3	2	1	0	0	1	0	0	1	2	0	0	0	0	1
CAPZA1	F-actin-capping protein subunit alpha-1	P52907	P52907	0.112833	-0.262189	-0.229322	0.633031					0.465695	0.583137	0.569114	0.24809	-0.263899	-0.120589	0.0524041	-0.0300656	-0.397395	-0.130947	0.114498	-0.109947	2	2	4	4	6	3	5	5	1	2	5	3	5	4	3	5
CAPZA2	F-actin-capping protein subunit alpha-2	P47755;C9JUG7;P47755-2;F8W9N7;A0A0D9SET8;F8WED3	P47755;C9JUG7;P47755-2;F8W9N7;A0A0D9SET8	1.49443	0.682774	-0.0970906	-2.12165					0.127081	0.292302	0.529383	0.988719	-0.595366	-0.48141	-0.171409	-0.151186	-0.485204	-0.295391	-0.396136	0.273637	0	1	2	2	1	1	0	2	0	0	2	1	2	1	1	2
CAPZB	F-actin-capping protein subunit beta	B1AK87;P47756-2;B1AK88;P47756;B1AK85	B1AK87;P47756-2;B1AK88;P47756;B1AK85	0.956524	-0.256755	-0.414378	-0.455578					0.232737	0.581438	0.623478	0.687844	-0.320858	-0.209218	0.090974	-0.0458918	-0.341238	-0.192528	-0.0666483	-0.103409	6	8	10	8	7	6	4	7	4	4	9	8	4	7	5	8
CARHSP1	Calcium-regulated heat stable protein 1	Q9Y2V2;H3BTK3;I3L3X8;H3BSW7;H3BUY4;H3BPY5;H3BNU9	Q9Y2V2;H3BTK3;I3L3X8;H3BSW7;H3BUY4;H3BPY5;H3BNU9	-0.297519	0.778687	1.35928	0.506734					0.589795	0.266488	0.151019	0.292966	-0.452949	0.0642515	-0.697197	0.615151	NaN	0.195835	-1.13152	NaN	0	1	2	1	1	1	1	1	0	0	0	1	0	1	0	1
CARM1	Histone-arginine methyltransferase CARM1	Q86X55-1;Q86X55;Q86X55-2;K7EQA8;K7EPK1;K7EK20;K7EIQ8;K7EQB9	Q86X55-1;Q86X55;Q86X55-2;K7EQA8	-1.36173	-1.90318	-0.933809	-0.12896					0.850609	0.936222	0.760844	0.55513	0.155651	-0.0427642	0.0316037	-0.187095	NaN	-0.102972	0.0427858	-0.337552	2	2	4	6	5	6	4	0	2	4	9	9	8	8	4	2
CARS	Cysteine--tRNA ligase, cytoplasmic	P49589-2;B4DKY1;P49589;P49589-3	P49589-2;B4DKY1;P49589;P49589-3	2.70248	2.78553	-0.0970906	0	+	+			0.0195997	0.0128645	0.529383	0.5	-0.227252	-0.112545	-0.0148749	0.0535736	-0.201872	-0.441795	NaN	NaN	2	3	2	3	0	0	0	0	0	1	0	1	0	0	0	0
CASP14	Caspase-14;Caspase-14 subunit p19;Caspase-14 subunit p10	P31944	P31944	-2.21851	-0.847723	-0.568154	0.602993					0.954753	0.751349	0.666907	0.258421	NaN	NaN	2.81048	NaN	NaN	-0.0773939	1.49384	NaN	0	0	6	3	1	2	1	0	3	0	6	4	4	1	0	0
CAT	Catalase	P04040	P04040	-0.936628	-1.85037	4.02031	3.26573			+	+	0.762597	0.930767	0.00113459	0.000223485	NaN	NaN	0.0891679	-1.37266	NaN	-1.18585	0.0221648	-0.952213	0	0	3	0	13	12	9	13	1	0	7	1	4	0	1	4
CAV1	Caveolin-1;Caveolin	Q03135;E9PCT5	Q03135;E9PCT5	-0.182996	-0.371563	-0.0151746	-0.269918					0.555525	0.616957	0.504596	0.614154	-1.20746	-1.65921	-0.939386	-1.09495	-1.38078	-1.8169	-0.805739	-1.38245	10	10	11	10	5	4	6	7	11	9	11	9	4	5	8	8
CAV2	Caveolin-2;Caveolin	P51636-2;P51636;E9PCT3;P51636-3	P51636-2;P51636;E9PCT3	-1.07439	0.0914978	-0.0970906	0					0.793833	0.4708	0.529383	0.5	-1.24478	-1.36715	-0.824631	-0.795845	NaN	-0.883854	NaN	NaN	1	2	3	1	0	0	0	0	2	2	2	1	0	0	1	1
CBFB	Core-binding factor subunit beta	Q13951;Q13951-2;J3KS23;J3KRT0;H3BSC0	Q13951;Q13951-2;J3KS23	1.49443	0.200566	1.46028	0.506734					0.127081	0.43621	0.133768	0.292966	0.969107	0.454803	NaN	NaN	0.684715	NaN	-0.138303	NaN	1	3	1	0	2	1	1	1	1	1	0	0	0	2	0	1
CBR1	Carbonyl reductase [NADPH] 1	P16152;P16152-2;E9PQ63;A8MTM1	P16152;P16152-2;E9PQ63;A8MTM1	1.28774	-1.08618	-0.123777	1.54821				+	0.162905	0.807759	0.537438	0.0480227	-0.0668085	-0.115675	0.19486	-0.188246	0.0286496	-0.0758014	NaN	0.0655011	3	6	6	5	1	0	1	4	0	3	5	6	0	2	1	2
CBX3	Chromobox protein homolog 3	Q13185;S4R2Y4;C9JMM0;B8ZZ43	Q13185	1.27307	2.91643	1.23933	0.506734		+			0.165676	0.00976943	0.173353	0.292966	0.530612	0.388506	0.232704	0.26768	0.281335	0.240272	0.293703	-0.367611	1	3	5	4	3	3	1	1	1	1	1	1	2	2	0	1
CCAR1	Cell division cycle and apoptosis regulator protein 1	A0A0C4DGG8;Q8IX12-2;Q8IX12;F5H1H2;F5H2E6;H0YFJ7;F5H3E1	A0A0C4DGG8;Q8IX12-2;Q8IX12;F5H1H2;F5H2E6	0.0308303	-0.191121	1.31886	2.311				+	0.490616	0.56081	0.158322	0.0064896	0.841315	0.419901	0.00120228	0.486664	0.564106	0.290186	0.369629	0.263321	3	3	3	3	1	2	1	2	2	2	4	2	0	2	0	3
CCDC80	Coiled-coil domain-containing protein 80	Q76M96;Q76M96-2;H7C5K4	Q76M96;Q76M96-2;H7C5K4	-0.297519	-2.0988	-0.0970906	0					0.589795	0.953564	0.529383	0.5	NaN	NaN	NaN	NaN	NaN	NaN	NaN	NaN	0	0	0	0	0	0	0	0	0	0	2	0	0	0	0	0
CCT2	T-complex protein 1 subunit beta	P78371;P78371-2;F5GWF6;F8VQ14	P78371;P78371-2;F5GWF6;F8VQ14	1.80067	0.747692	-0.681145	0.47824					0.0847246	0.274703	0.697484	0.303587	0.431391	0.378757	0.117518	0.509547	0.173347	0.283806	NaN	0.770412	15	12	16	15	0	0	1	4	7	6	14	8	0	1	2	4
CCT3	T-complex protein 1 subunit gamma	P49368;P49368-2;B4DUR8;E9PRC8;Q5SZX6;Q5SZX9;E9PM09;Q5SZW8;E9PQ35	P49368;P49368-2;B4DUR8	4.19378	3.31315	4.18841	3.3718	+	+	+	+	0.000687135	0.00399224	0.000735939	0.000144644	0.333875	0.288769	0.0842878	0.432104	0.489535	0.317929	0.0824297	0.370035	33	34	32	31	26	27	27	27	8	11	12	15	4	7	5	7
CCT4	T-complex protein 1 subunit delta	P50991;P50991-2	P50991;P50991-2	2.56321	1.15291	1.53284	1.11114	+				0.0252433	0.17798	0.122242	0.116145	0.463249	0.380511	0.102682	0.497547	0.244254	0.287913	0.0197497	0.420206	14	10	14	12	5	4	3	5	4	5	9	7	1	2	2	3
CCT5	T-complex protein 1 subunit epsilon	P48643;E7ENZ3;B7ZAR1;E9PCA1;P48643-2;D6RIZ7	P48643;E7ENZ3;B7ZAR1;E9PCA1;P48643-2	1.99618	0.57745	-0.532194	1.67806				+	0.0638602	0.321917	0.656924	0.0356214	0.266364	0.362355	0.213464	0.561186	0.214909	0.297519	0.202392	0.847029	14	14	11	9	0	1	2	2	6	7	11	6	0	2	0	1
CCT6A	T-complex protein 1 subunit zeta	P40227;P40227-2;J3KRI6	P40227;P40227-2	3.58211	2.70712	3.68358	2.32354	+	+	+	+	0.00313537	0.0150985	0.00258009	0.00624796	0.304796	0.337681	0.0947352	0.407778	0.255294	0.260957	0.104969	0.403124	21	21	20	19	6	7	6	8	6	9	13	10	2	2	1	4
CCT7	T-complex protein 1 subunit eta	Q99832;Q99832-3;Q99832-4;Q99832-2;F8WAM2;F8WBP8;A0A0D9SG95	Q99832;Q99832-3;Q99832-4;Q99832-2	3.10346	1.35213	2.20925	2.00988	+		+	+	0.00894112	0.139492	0.0467285	0.0153621	0.313088	0.317371	0.0946792	0.55894	0.210049	0.29387	0.117214	0.526487	17	16	15	11	5	4	8	5	3	6	11	8	1	2	2	5
CCT8	T-complex protein 1 subunit theta	P50990;P50990-2;P50990-3;H7C4C8;H7C2U0	P50990;P50990-2;P50990-3	2.48093	1.79111	1.32386	1.50627	+				0.0291766	0.0757749	0.157405	0.0526967	0.458642	0.417659	0.106666	0.522402	0.341818	0.366221	0.111373	0.481738	31	29	30	20	12	15	12	14	10	12	15	12	9	9	6	10
CD3EAP	DNA-directed RNA polymerase I subunit RPA34	O15446;O15446-2	O15446;O15446-2	2.02011	2.43695	-0.0970906	0		+			0.0616079	0.0255176	0.529383	0.5	NaN	NaN	NaN	NaN	0.875317	0.963357	NaN	NaN	2	2	4	3	0	0	0	0	0	0	0	0	0	0	0	0
CD44	CD44 antigen	H0YD13;P16070-18;P16070-12;P16070-14;P16070-13;P16070-11;P16070-10;P16070-16;P16070-8;P16070-17;P16070-6;P16070-4;P16070-3;P16070-7;P16070-5;P16070;H0Y2P0;H0YDW7;H0YCV9;P16070-15;H0Y5E4;P16070-9;E9PKC6;H0YDX6;Q86UZ1;H0YE40;P16070-19;H0YD17;J3KN83	H0YD13;P16070-18;P16070-12;P16070-14;P16070-13;P16070-11;P16070-10;P16070-16;P16070-8;P16070-17;P16070-6;P16070-4;P16070-3;P16070-7;P16070-5;P16070;H0Y2P0;H0YDW7;H0YCV9;P16070-15;H0Y5E4;P16070-9;E9PKC6;H0YDX6	0.163008	0.133892	-0.0970906	0.136461					0.450507	0.457314	0.529383	0.441686	-0.556468	-0.654509	-0.0363659	-0.61333	-0.368089	-0.930495	NaN	-1.25354	1	2	2	1	0	0	0	1	1	1	2	1	0	0	0	1
CDC37	Hsp90 co-chaperone Cdc37;Hsp90 co-chaperone Cdc37, N-terminally processed	Q16543;K7EQA9;K7EKQ2;K7EIU0;K7EL68	Q16543;K7EQA9;K7EKQ2	-0.198916	-0.505002	0.902909	1.5667				+	0.56032	0.657018	0.246495	0.04607	0.0529947	0.00762169	-0.129388	0.445365	0.44164	0.170969	-0.0524544	0.436531	3	1	5	3	2	1	2	3	2	3	4	4	1	1	2	1
CDC42	Cell division control protein 42 homolog	P60953;P60953-1;Q5JYX0	P60953;P60953-1;Q5JYX0	0.87364	0.107793	0.770813	0.647875					0.252508	0.465612	0.279186	0.243068	-0.539667	-0.420233	-0.521532	-0.279734	-0.665932	-0.370749	-0.509505	-0.266506	4	6	7	7	3	2	3	3	2	4	6	6	3	3	1	3
CDC42BPB	Serine/threonine-protein kinase MRCK beta	Q9Y5S2;H0YLY0;H0YLR5	Q9Y5S2;H0YLY0	1.29458	-1.89455	-0.681145	-0.493266					0.161623	0.935355	0.697484	0.702036	-0.415977	-0.675839	-0.161492	-0.323476	NaN	NaN	NaN	NaN	2	1	1	0	0	0	1	0	0	0	3	0	0	1	0	1
CDC5L	Cell division cycle 5-like protein	Q99459	Q99459	1.02011	0.0730744	-0.0970906	0					0.218172	0.476672	0.529383	0.5	0.67627	0.597399	0.00276365	0.319316	1.08336	0.734439	NaN	NaN	1	1	2	3	0	0	0	0	1	1	2	2	1	1	0	0
CDC73	Parafibromin	Q6P1J9	Q6P1J9	1.70248	4.21891	1.42174	1.60299		+		+	0.096963	0.000365166	0.140184	0.0424238	0.631095	0.589656	0.0399162	0.837065	0.686115	0.519139	-0.109521	-0.497459	2	1	5	5	2	0	2	1	0	0	0	0	1	0	0	0
CDK1	Cyclin-dependent kinase 1	P06493;A0A024QZP7;A0A087WZZ9;E5RIU6;P06493-2;K7ELV5	P06493;A0A024QZP7;A0A087WZZ9;E5RIU6;P06493-2	2.69711	0.653143	0.428011	0.602993	+				0.0197957	0.300505	0.372598	0.258421	2.70408	2.0787	0.0859932	0.588147	2.25069	1.75998	-0.182559	NaN	3	5	3	1	4	4	1	0	0	0	2	0	3	4	0	0
CDK2	Cyclin-dependent kinase 2	P24941;G3V5T9;P24941-2;E7ESI2;Q00526;K7EJ83;G3V317	P24941;G3V5T9;P24941-2;E7ESI2	-0.454338	-0.674219	-1.41469	-0.382283					0.635583	0.705341	0.85862	0.659448	0.818067	1.07724	-0.0217803	0.645573	1.24502	1.09491	0.0699041	NaN	1	1	7	5	4	5	0	2	1	1	6	5	7	5	2	1
CDK4	Cyclin-dependent kinase 4	P11802;F8VYH9;F8VZZ0;F8VTV8;F8VWX7;F8VZ51;F8VXD2;P11802-2;F8W1L8;F8VYY1;Q96BE9	P11802;F8VYH9;F8VZZ0;F8VTV8;F8VWX7;F8VZ51;F8VXD2;P11802-2	1.01148	1.08663	1.62247	0					0.220119	0.192144	0.108991	0.5	NaN	0.573758	-0.238434	0.222805	0.840243	0.473415	0.00324471	NaN	1	1	2	2	3	2	0	0	0	0	1	2	2	2	0	0
CDK9	Cyclin-dependent kinase 9	P50750;P50750-2;X6RE90	P50750;P50750-2	-6.17252	-4.89484	-0.891585	-2.93423					0.999999	0.999956	0.750785	0.999196	0.747221	0.718153	-0.0579521	NaN	NaN	0.765338	0.732542	-0.166577	0	0	3	3	8	7	6	3	9	7	10	10	9	9	8	9
CDKN2A	Cyclin-dependent kinase inhibitor 2A, isoforms 1/2/3	J3QRG6;P42771;P42771-4;K7ES20;P42771-2;K7ENC6;P42771-3;G3XAG3	J3QRG6;P42771;P42771-4;K7ES20;P42771-2;K7ENC6	0.379812	0.847872	3.08192	0			+		0.385981	0.248613	0.00964101	0.5	2.0373	1.70306	-0.399569	1.23742	1.93645	2.06101	-0.328057	NaN	2	2	2	2	2	2	0	0	1	2	0	2	0	0	0	0
CDKN2AIP	CDKN2A-interacting protein	Q9NXV6	Q9NXV6	-1.65218	0.200566	-0.0970906	0					0.896286	0.43621	0.529383	0.5	0.00908996	0.0369137	NaN	NaN	NaN	NaN	NaN	NaN	1	1	2	1	0	0	0	0	1	1	1	1	0	0	0	0
CDSN	Corneodesmosin	Q15517;G8JLG2	Q15517;G8JLG2	-0.297519	-0.0126235	-0.68296	0					0.589795	0.504032	0.697965	0.5	NaN	NaN	NaN	NaN	NaN	NaN	NaN	NaN	0	0	2	1	0	0	0	0	0	0	1	1	1	0	0	0
CENPV	Centromere protein V	Q7Z7K6-3;Q7Z7K6-2	Q7Z7K6-3	0.280273	-0.359996	1.90382	0					0.415329	0.613417	0.0741549	0.5	NaN	NaN	0.360862	-0.185127	NaN	NaN	0.298999	NaN	0	1	0	0	1	1	0	0	0	0	0	0	0	1	0	0
CEP170	Centrosomal protein of 170 kDa	Q5SW79;H0Y2V6;Q5SW79-3;Q5SW79-2;E7EMW0;H0Y4T4;E7EWM2;Q96L14;E5RG47;E5RGW7;H0YB66;H0YB92;E5RIH6;E5RJT5;E5RFU8;Q00G26;Q9Y4F5-3;Q9Y4F5-2;Q9Y4F5;J3KQR7	Q5SW79;H0Y2V6;Q5SW79-3;Q5SW79-2	8.45077	7.78822	4.54348	5.13394	+	+	+	+	5.66e-11	2.25e-10	0.000280535	1.7e-08	0.314438	0.319145	-0.334862	0.84845	0.521155	0.537008	0.469036	0.511185	42	42	38	35	4	8	8	6	0	0	2	3	0	0	0	0
CFL1	Cofilin-1	P23528;G3V1A4;E9PP50;E9PK25;E9PQB7;E9PLJ3;E9PS23	P23528;G3V1A4;E9PP50;E9PK25;E9PQB7;E9PLJ3;E9PS23	1.09707	0.443534	0.934333	0.907162					0.201268	0.361249	0.239032	0.164729	-0.317048	-0.0392861	0.155647	-0.219887	-0.235419	0.0388075	0.0807081	-0.154923	19	19	18	18	16	16	14	15	17	16	15	18	14	13	11	14
CFL2	Cofilin-2	Q9Y281;Q9Y281-3;F8WDN3;G3V2U0	Q9Y281;Q9Y281-3	2.49571	2.34606	0.514948	1.28889	+	+			0.0284349	0.0301625	0.347903	0.0829392	0.302778	0.0631941	NaN	NaN	-0.459041	-0.0793891	NaN	NaN	4	3	4	2	0	1	0	1	0	1	0	1	0	0	0	0
CHAMP1	Chromosome alignment-maintaining phosphoprotein 1	Q96JM3	Q96JM3	-0.297519	1.67585	-0.0970906	0					0.589795	0.0898316	0.529383	0.5	0.810864	0.826871	NaN	NaN	NaN	1.72752	NaN	NaN	0	0	1	2	0	0	0	0	0	0	0	0	0	0	0	0
CHCHD3	Coiled-coil-helix-coiled-coil-helix domain-containing protein 3, mitochondrial	Q9NX63;C9JRZ6;F8WAR4;F8WD73	Q9NX63;C9JRZ6;F8WAR4	-2.82622	-2.15882	-0.0970906	0					0.984478	0.95805	0.529383	0.5	-0.0719512	-0.0122723	-0.00735609	-0.145329	NaN	-0.290235	NaN	NaN	0	0	2	1	0	0	0	1	2	3	5	3	0	0	0	0
CHD4	Chromodomain-helicase-DNA-binding protein 4	F5GWX5;Q14839;A0A0C4DGG9;Q14839-2;F5H6N4;F2Z2R5;K7EPV1;F6T542;K7ESA5;I3L229;H7C3H7;H7C0J3	F5GWX5;Q14839;A0A0C4DGG9;Q14839-2	-0.517479	0.168029	-0.0136592	0.328823					0.653525	0.44649	0.504137	0.361862	1.03686	0.7405	0.0846896	0.389112	0.824484	0.730295	0.0835375	NaN	2	5	8	6	6	6	1	1	3	4	5	5	5	5	2	1
CIRBP	Cold-inducible RNA-binding protein	Q14011;K7ENX8;K7ELV6;K7EJV5;K7ELT6;K7EJV1;K7EMY9;K7EPM4;K7ER40;K7EQR7;Q14011-2;D6W5Y5;K7EQX4;K7ENN6;K7EIF7;K7EQL0	Q14011;K7ENX8;K7ELV6;K7EJV5;K7ELT6;K7EJV1;K7EMY9;K7EPM4;K7ER40;K7EQR7;Q14011-2;D6W5Y5	0.358421	-0.198159	0.487872	0.847567					0.392239	0.563031	0.355531	0.181111	-0.265912	-0.0161092	-0.157881	-0.746524	0.0109061	-0.0237841	-0.223122	NaN	4	3	2	2	3	2	2	2	3	2	3	3	3	2	1	2
CIZ1	Cip1-interacting zinc finger protein	Q9ULV3-5;Q9ULV3-3;H0Y5D5;Q9BTG3;Q9ULV3-4;Q9ULV3-2;Q5SYW2;Q9ULV3;F5H2X7	Q9ULV3-5;Q9ULV3-3;H0Y5D5;Q9BTG3;Q9ULV3-4;Q9ULV3-2;Q5SYW2;Q9ULV3;F5H2X7	-0.297519	-0.359996	2.20834	0			+		0.589795	0.613417	0.0467959	0.5	NaN	NaN	NaN	NaN	NaN	NaN	0.349963	NaN	0	0	0	0	2	1	0	0	0	0	0	0	0	0	0	0
CKAP4	Cytoskeleton-associated protein 4	Q07065;H3BUW6;H3BN64;Q96K21-4;H3BRM1;Q96K21-3;H3BRF9;Q96K21-2;Q96K21	Q07065	-0.462729	-0.508709	0.252733	-0.480772					0.637985	0.658108	0.423912	0.697363	-1.03573	-1.17353	0.0207301	-1.17664	-1.28706	-1.26244	-0.0803339	-1.20059	24	25	29	27	7	9	14	20	23	24	32	28	8	7	16	22
CKAP5	Cytoskeleton-associated protein 5	Q14008-2;Q14008;Q14008-3;H0YDX5;E9PQH5;H0YCF6;H0YEK7	Q14008-2;Q14008;Q14008-3	2.17936	0.224966	-0.0970906	0	+				0.0481632	0.428528	0.529383	0.5	0.176483	0.140175	0.00166347	0.281877	0.0356981	-0.209543	NaN	NaN	2	3	2	3	0	0	0	0	1	1	4	3	0	0	0	1
CKB	Creatine kinase B-type	P12277;G3V461;G3V4N7	P12277;G3V461;G3V4N7	2.02869	0.200566	-0.0970906	0					0.0608154	0.43621	0.529383	0.5	-1.21634	-0.967639	NaN	NaN	-1.20025	NaN	NaN	NaN	3	1	1	0	0	0	0	0	0	0	0	0	0	0	0	0
CLIC1	Chloride intracellular channel protein 1	O00299	O00299	0.746293	-0.10187	0.0989458	-0.118778					0.284526	0.532503	0.470057	0.550802	0.157347	0.227003	0.289152	0.206059	0.268313	0.339095	0.303296	0.243302	8	9	11	7	8	9	6	9	5	7	9	8	8	9	6	9
CLIC4	Chloride intracellular channel protein 4	Q9Y696;A6PVS0;O15247	Q9Y696	0.739107	-0.21036	-0.230851	0.0899856					0.286389	0.566877	0.56957	0.461468	-0.866585	-0.615129	-0.987713	0.239189	-0.987071	-0.722244	-0.970352	0.24647	7	8	10	8	5	5	5	6	7	6	10	8	6	6	5	6
CLINT1	Clathrin interactor 1	Q14677-2;Q14677;Q14677-3	Q14677-2;Q14677;Q14677-3	-0.297519	-0.913374	1.65047	0					0.589795	0.767704	0.105072	0.5	NaN	0.295808	0.339019	0.249072	NaN	NaN	0.53502	NaN	0	0	0	0	3	0	0	0	0	0	1	0	1	0	0	0
CLP1	Polyribonucleotide 5-hydroxyl-kinase Clp1	Q92989;E9PL17;Q92989-2;E9PJM4;E9PKV5	Q92989;E9PL17;Q92989-2	7.91208	7.1227	8.2813	7.42547	+	+	+	+	7.84e-10	5.89e-09	1.61e-10	7.17e-16	NaN	-0.536585	0.162627	-0.798226	0.667052	0.46315	0.1068	-0.0542834	17	17	15	16	20	20	17	11	1	0	0	1	0	0	0	1
CLPX	ATP-dependent Clp protease ATP-binding subunit clpX-like, mitochondrial	O76031;H0YM48;H0YK07	O76031	-0.297519	-0.359996	7.87778	7.28348			+	+	0.589795	0.613417	1.11e-09	2.44e-15	NaN	-0.935357	NaN	NaN	NaN	NaN	-0.300159	-1.49202	0	0	0	0	20	23	22	18	0	0	0	0	0	0	0	0
CLSTN1	Calsyntenin-1;Soluble Alc-alpha;CTF1-alpha	O94985-2;O94985;Q5SR54	O94985-2;O94985;Q5SR54	4.0158	4.3922	2.86132	1	+	+	+		0.00109128	0.000218488	0.0149076	0.141186	NaN	NaN	NaN	NaN	-0.65975	-0.621055	-0.452601	-1.28918	4	6	6	7	5	2	1	1	0	0	0	0	0	0	0	0
CLTC	Clathrin heavy chain 1	Q00610-2;Q00610;A0A087WVQ6;J3KS13;K7EJJ5;J3KSQ2;J3KRF5;J3QL20;F5H5N6	Q00610-2;Q00610;A0A087WVQ6	-0.154468	-0.170943	-0.00778827	0.0297296					0.546912	0.554433	0.502359	0.487252	-0.342957	-0.218857	-0.0773781	-0.191214	-0.668296	-0.310654	-0.0819692	-0.241052	56	55	66	60	40	42	44	40	52	55	64	62	34	39	37	37
CLUH	Clustered mitochondria protein homolog	K7EIG1;O75153;I3L2B0;I3L4B5	K7EIG1;O75153;I3L2B0	-0.297519	-1.01561	-1.34513	0					0.589795	0.791937	0.846451	0.5	0.41001	0.0366356	0.0156764	NaN	NaN	0.324605	NaN	NaN	0	0	0	2	1	1	0	0	1	0	2	2	0	1	0	0
CMPK1	UMP-CMP kinase	P30085;Q5T0D2;P30085-2	P30085;Q5T0D2	2.01849	0.309464	2.03809	2.311				+	0.0617586	0.402153	0.0608737	0.0064896	-0.232359	-0.104618	-0.00966339	0.156146	-0.159979	-0.0907426	-0.151713	0.368253	4	4	3	4	2	3	3	2	0	4	3	2	2	2	1	0
CNBP	Cellular nucleic acid-binding protein	P62633-2;P62633;P62633-7;P62633-3;P62633-8;P62633-5;P62633-4;P62633-6;D6RAT4	P62633-2;P62633;P62633-7;P62633-3;P62633-8;P62633-5;P62633-4;P62633-6	1.01148	-1.36	1.48392	-0.0632719					0.220119	0.861901	0.129932	0.527114	0.404519	0.314329	-0.233415	-0.0535392	NaN	0.485667	-0.157418	-0.0507765	0	2	2	2	5	5	2	2	0	0	2	1	4	4	2	2
CNDP2	Cytosolic non-specific dipeptidase	Q96KP4;Q96KP4-2;J3QKT2;J3QQN6;J3QR27;J3QLU1;J3QKQ0;J3QRD0;J3QL02;J3KSV5;A0A087WYZ1;J3KRD5;A0A087WVS2;J3QRA8;J3KSS4;J3QRP4;J3QRH4	Q96KP4;Q96KP4-2;J3QKT2	-1.29752	-0.359996	0.514948	0.506734					0.838926	0.613417	0.347903	0.292966	-0.0496286	0.193076	0.304737	-0.034727	NaN	0.300162	0.74758	NaN	1	1	4	4	0	1	1	1	1	3	5	3	0	1	0	2
CNN1	Calponin-1	P51911;P51911-2;B7Z7E1;K7ER02;K7EQ72;K7ESJ2;K7ENC5;K7ERK4;K7ERM8	P51911;P51911-2;B7Z7E1;K7ER02	0.650661	-1.62456	0.447382	0.972525					0.309779	0.903325	0.367046	0.147903	-2.20649	NaN	-1.48013	0.516381	0.608629	NaN	-1.24763	0.231612	5	0	0	0	0	3	1	3	1	2	2	0	0	2	1	2
CNN2	Calponin-2	B4DDF4;Q99439;B4DUT8;A0A087X271;Q99439-2;A0A087X1X5;H3BVI6;K7ES69;H3BQH0;A0A087WV51;U3KPS3	B4DDF4;Q99439;B4DUT8;A0A087X271;Q99439-2;A0A087X1X5;H3BVI6;K7ES69	0.903139	-0.120285	0.357466	0.0795899					0.245372	0.538362	0.393035	0.465908	-1.57658	-1.12649	1.27757	-0.469104	-1.64993	-1.07251	-0.623308	-0.612453	5	3	5	4	1	3	2	4	4	3	7	5	1	1	2	3
CNN3	Calponin-3	Q15417;Q15417-3	Q15417;Q15417-3	0.67146	0.070988	-0.418474	-0.121649					0.304204	0.477337	0.624658	0.552023	-0.695601	-0.407887	-0.521081	0.255347	-0.882343	-0.474791	-0.120676	0.223619	5	5	5	3	1	1	1	3	5	2	4	4	3	2	2	3
CNOT1	CCR4-NOT transcription complex subunit 1	A5YKK6-2;A5YKK6;A5YKK6-3;H3BMZ2;B5MDN3;A5YKK6-4;A0A0E3D6M3;H3BPF1;H3BT18;H3BU44;H3BNB1	A5YKK6-2;A5YKK6;A5YKK6-3	-0.297519	2.46363	0.514948	0		+			0.589795	0.0242737	0.347903	0.5	0.118939	0.163921	-0.26028	0.154327	NaN	-0.184705	NaN	NaN	1	0	4	3	0	1	1	0	0	0	1	1	0	0	0	0
CNP	2,3-cyclic-nucleotide 3-phosphodiesterase	P09543-2;P09543;K7EN66;C9K0L8;K7ERZ0;K7ERC4	P09543-2;P09543	1.71317	-0.624564	-0.420651	-1.39946					0.0955708	0.691486	0.625285	0.933764	NaN	NaN	-0.230386	NaN	-0.457886	-0.409618	NaN	NaN	2	1	1	3	1	1	0	2	0	1	2	1	2	1	1	3
CNTRL	Centriolin	Q7Z7A1-2;Q7Z7A1-5;Q7Z7A1;Q5JVD1;Q7Z7A1-3;Q5JVD5;Q5JVD6	Q7Z7A1-2;Q7Z7A1-5;Q7Z7A1;Q5JVD1	1.47451	0.728591	0.0281928	0					0.130273	0.279826	0.491461	0.5	-0.230003	-0.206463	0.0368874	-0.0202233	-0.548065	-0.449402	-0.00729389	-0.371906	4	1	1	1	2	3	2	1	3	1	2	1	3	3	1	1
COL12A1	Collagen alpha-1(XII) chain	D6RGG3;Q99715;Q99715-4;A0A087X0A8;Q99715-2;H0Y4P7;H0Y5N9;H0Y991	D6RGG3;Q99715;Q99715-4;A0A087X0A8;Q99715-2	-0.168949	-0.567954	0.514948	0.919704					0.551287	0.675352	0.347903	0.161408	-0.411873	-1.48984	-0.843265	-2.09992	-0.67382	-2.12258	NaN	-0.558705	14	6	32	29	0	1	36	17	15	8	44	24	0	0	18	16
COL1A1	Collagen alpha-1(I) chain	P02452;CON__Q862S4;I3L3H7;P02458-1;P02458	P02452	-4.03566	-1.30442	-2.50328	-3.14					0.998963	0.85185	0.971328	0.999632	-2.08092	-2.24512	-1.14683	-1.72937	NaN	NaN	NaN	NaN	0	0	0	1	1	3	0	0	4	3	1	1	12	6	2	4
COL1A2	Collagen alpha-2(I) chain	A0A087WTA8;P08123	A0A087WTA8;P08123	-3.8864	-2.70055	-2.41956	0					0.998489	0.9847	0.966904	0.5	-1.68558	-2.01471	-1.9035	-1.54527	NaN	NaN	NaN	NaN	0	0	0	0	0	0	0	0	4	1	2	3	3	2	0	0
COL6A1	Collagen alpha-1(VI) chain	A0A087X0S5;P12109	A0A087X0S5;P12109	-0.413978	-0.384029	-0.207009	-0.178819					0.623953	0.62076	0.562448	0.57622	-2.28533	-1.85505	0.98298	-3.02024	-2.37745	-1.60107	0.957337	-3.1709	12	11	16	12	9	3	11	11	11	11	17	17	7	7	11	12
COL6A2	Collagen alpha-2(VI) chain	P12110;P12110-3;P12110-2;H7C0M5;C9JH44	P12110;P12110-3;P12110-2	-1.10656	-0.613226	-0.981637	-0.23677					0.800762	0.688283	0.771966	0.600456	-2.18807	-2.01905	1.03398	-2.88572	-2.33555	-2.36937	0.92926	-2.01278	8	9	12	11	5	6	13	12	9	8	17	13	6	9	11	15
COL6A3	Collagen alpha-3(VI) chain	P12111-2;P12111;P12111-5;P12111-3;I3L392	P12111-2;P12111	-0.332207	-0.370836	0.160888	-0.144864					0.600053	0.616734	0.451387	0.561877	-2.21142	-2.37575	0.870408	-2.67677	-2.15769	-2.34375	1.12191	-2.89496	71	53	86	85	45	34	47	48	68	63	98	97	34	32	55	61
COL8A1	Collagen alpha-1(VIII) chain;Vastatin	P27658	P27658	-0.207823	-0.687137	-0.409274	0.31735					0.562999	0.708897	0.622006	0.366494	NaN	NaN	NaN	NaN	-0.371699	-2.10082	-1.42564	-0.98137	2	1	3	3	1	0	1	1	2	0	3	3	1	1	1	1
COLGALT1	Procollagen galactosyltransferase 1	Q8NBJ5;M0QX72;M0QYH0	Q8NBJ5	-3.19333	-0.99159	-2.41793	-1.83715					0.992587	0.786383	0.966812	0.975863	-0.793597	-0.86682	-0.822465	0.740061	-0.553554	-0.935272	NaN	0.179228	1	2	8	3	2	1	2	3	4	7	7	7	2	4	5	6
COPA	Coatomer subunit alpha;Xenin;Proxenin	P53621;P53621-2	P53621;P53621-2	-0.0399028	-0.560624	-0.357279	0.205281					0.512145	0.673238	0.60691	0.412672	-0.602858	-0.629738	-0.0774487	-0.49008	-0.789529	-0.677304	-0.0550179	-0.58202	18	18	24	24	19	24	17	15	17	16	28	18	17	20	22	14
COPB1	Coatomer subunit beta	P53618;E9PP73;E9PP63;E9PKQ1	P53618;E9PP73	-0.125594	-0.270211	0.389971	0.15981					0.538173	0.585642	0.383578	0.431799	-0.601052	-0.59761	-0.0748702	-0.435159	-0.812216	-0.649094	-0.00129194	-0.326539	11	11	21	16	7	6	6	9	10	16	19	13	3	6	6	10
COPB2	Coatomer subunit beta	P35606-2;P35606;H0Y938;D6RBT6;H0YAC7;D6R997;D6RBZ7;D6RCL6;D6RBG7	P35606-2;P35606	-0.218604	-0.474642	-0.137356	0.0764593					0.566237	0.648038	0.541531	0.467246	-0.432285	-0.590337	-0.021735	-0.366876	-0.710052	-0.768226	0.00490039	-0.584463	7	7	13	14	8	9	8	3	7	9	14	9	8	8	9	6
COPE	Coatomer subunit epsilon	O14579;M0QXB4;O14579-2;A0A087X0I4;O14579-3;M0R061	O14579;M0QXB4;O14579-2;A0A087X0I4;O14579-3;M0R061	0.205849	-0.11324	-0.14633	-0.844641					0.437595	0.536122	0.544233	0.818059	-0.864923	-0.585665	-0.0550029	-0.477697	-0.569757	-0.585214	-0.0791108	-0.662674	4	5	6	8	5	6	3	5	3	4	7	6	4	4	5	5
COPG1	Coatomer subunit gamma-1	Q9Y678;H0Y8X7;H0Y8G2	Q9Y678	-0.0576248	-0.0740357	-0.55338	-0.378428					0.517536	0.523635	0.662819	0.657927	-0.66652	-0.631812	-0.0696203	-0.437106	-0.863645	-0.675531	0.0111733	-0.457723	12	15	20	18	3	5	8	6	12	14	19	15	4	7	6	11
COPZ1	Coatomer subunit zeta-1	P61923;F8VVA7;F8VXB1;F8W156;P61923-5;F8VYZ4;P61923-4;F8VUC5;F8W651;F8VXR1;P61923-3;F8VYK5;P61923-2;F8VYE0	P61923;F8VVA7;F8VXB1;F8W156;P61923-5;F8VYZ4;P61923-4;F8VUC5;F8W651;F8VXR1	-1.29752	1.36051	-1.07092	-0.585729					0.838926	0.138009	0.791927	0.735542	-0.295816	-0.24399	0.160259	0.237393	0.121708	-0.376934	0.351372	NaN	1	1	3	2	0	1	0	1	4	1	0	1	1	1	0	2
CORO1B	Coronin-1B;Coronin	Q9BR76;A0A087WW53;F5H390;F5H0D2;A9Z1Z3-3;A9Z1Z3	Q9BR76;A0A087WW53;F5H390	0.605074	0.0186144	0.460278	-0.493266					0.322151	0.494054	0.363365	0.702036	-0.931036	-0.628751	-0.233321	-0.347037	-1.22049	-0.52541	NaN	NaN	3	4	2	4	1	0	0	0	2	2	5	3	0	0	0	1
CORO1C	Coronin-1C;Coronin	Q9ULV4;Q9ULV4-2;Q9ULV4-3;B4E3S0;H0YHL7;F8VV53;F8W1H8;F8VUX3;F8VSA4;F8VRE9;F8VTT6;F8VVB7;Q6QEF8-4;Q6QEF8-3;Q6QEF8-2;J3QLV6;J3KSS5;Q6QEF8-5;Q6QEF8	Q9ULV4;Q9ULV4-2;Q9ULV4-3;B4E3S0;H0YHL7	-0.779189	-0.566386	-0.585356	-0.302125					0.723927	0.674901	0.671641	0.627329	-0.418062	-0.273929	-0.85025	0.516446	-0.558078	-0.276276	-0.879685	0.64737	16	14	15	15	18	14	16	13	19	15	17	16	18	16	15	17
CORO2B	Coronin-2B	Q9UQ03;Q9UQ03-2	Q9UQ03;Q9UQ03-2	-1.34453	-0.548539	0.164311	-1					0.847536	0.66974	0.450358	0.858814	NaN	NaN	NaN	NaN	NaN	NaN	NaN	NaN	1	0	0	1	1	1	1	1	1	1	1	1	1	1	1	1
COTL1	Coactosin-like protein	Q14019;H3BT58	Q14019;H3BT58	0.0647457	-0.103248	0.113519	-0.120961					0.480299	0.532942	0.465657	0.55173	-0.659552	-0.22075	0.193878	-0.34807	-0.552124	-0.264443	0.0808535	-0.340253	11	11	9	9	8	9	6	7	8	10	10	11	8	9	6	7
COX4I1	Cytochrome c oxidase subunit 4 isoform 1, mitochondrial	P13073;H3BPG0;H3BN72;H3BNV9;Q86WV2;H3BNI5	P13073;H3BPG0;H3BN72;H3BNV9;Q86WV2	0.735973	0.00866424	0.526462	-0.539128					0.287204	0.497232	0.344677	0.718896	-0.41379	-0.216279	0.0721939	-0.7877	-0.385427	-0.15688	0.102421	-0.858385	3	4	4	4	2	1	3	1	1	4	3	5	3	2	2	2
COX5A	Cytochrome c oxidase subunit 5A, mitochondrial	P20674;H3BNX8;H3BRM5;H3BV69;H3BRI0	P20674;H3BNX8;H3BRM5;H3BV69	-3.33832	-1.10249	-1.42065	-1.60319					0.994571	0.811309	0.859632	0.957595	-0.364907	-0.142123	0.0769087	-0.767487	NaN	-0.222913	-0.101945	NaN	0	0	3	1	1	2	0	0	2	3	3	2	2	0	1	2
COX5B	Cytochrome c oxidase subunit 5B, mitochondrial	P10606	P10606	-0.634494	-0.355719	-0.125592	0					0.685857	0.612106	0.537985	0.5	-0.55716	-0.301516	0.163822	-0.919594	NaN	-0.283726	NaN	NaN	2	1	3	1	1	0	0	0	2	4	2	2	1	1	0	0
COX7A2	Cytochrome c oxidase subunit 7A2, mitochondrial	P14406;H0UI06;D6R9C3;D6RIE3;D6RGV5	P14406;H0UI06;D6R9C3;D6RIE3;D6RGV5	-0.234125	-0.866108	-0.0970906	0.566704					0.570892	0.75599	0.529383	0.271193	-0.428983	-0.234893	0.131021	-1.0616	-0.163342	0.0361005	NaN	NaN	2	1	1	2	0	0	1	1	1	1	2	1	0	0	0	0
COX7C	Cytochrome c oxidase subunit 7C, mitochondrial	P15954;D6R9Z7	P15954;D6R9Z7	-0.601882	-0.877034	-0.137321	1.63369				+	0.676975	0.758726	0.54152	0.0395249	-0.286783	-0.197375	0.10219	-0.9641	NaN	-0.200854	0.228079	-0.749508	1	1	2	2	2	1	0	2	1	1	2	2	1	1	0	1
CPNE1	Copine-1	F2Z2V0;Q99829;A6PVH9;B0QZ18;E7ENH5;Q5JX58;Q5JX59;Q5JX60;Q5JX44;Q5JX45;Q5JX56;Q5JX55;Q5JX61;Q5JX52;Q5JX54;Q5JX57;E7EV27;Q5JX53;H0Y524	F2Z2V0;Q99829;A6PVH9;B0QZ18;E7ENH5;Q5JX58;Q5JX59;Q5JX60;Q5JX44;Q5JX45;Q5JX56;Q5JX55;Q5JX61;Q5JX52	1.31225	1.23766	1.30013	0.945109					0.158343	0.160855	0.161782	0.154815	-0.135479	-0.142793	-0.169269	-0.015215	-0.180771	-0.121389	-0.0891644	-0.0167063	9	7	10	13	6	7	5	5	5	6	6	6	3	5	1	3
CPNE3	Copine-3	O75131;A0A087WYQ3;E5RHZ0;A0A087WXR6;H0YB26;A0A087WUS8;E5RFT7;Q86YQ8-2;Q9HCH3-2;Q96FN4-2;Q96FN4;E7ENV7;Q8IYJ1;Q9UBL6-2;Q86YQ8;Q9HCH3;Q9UBL6	O75131;A0A087WYQ3;E5RHZ0	0.063559	0.0248301	-0.171043	0.0526693					0.48066	0.492069	0.551665	0.477424	0.119415	0.0864899	0.0739528	-0.00502217	0.194376	0.0790458	0.0699854	-0.0726988	6	8	11	11	9	9	7	6	6	5	10	9	9	9	7	8
CPSF1	Cleavage and polyadenylation specificity factor subunit 1	Q10570;A0A087X101;E9PIM1;A0A087WTV4	Q10570	-0.297519	-0.359996	3.32458	0.602993			+		0.589795	0.613417	0.00579675	0.258421	0.425314	0.343443	-0.0524029	0.138845	NaN	NaN	-0.00554892	0.0760728	0	0	0	0	7	2	2	0	0	0	0	0	1	1	0	0
CPSF2	Cleavage and polyadenylation specificity factor subunit 2	Q9P2I0;H0YJF4	Q9P2I0	2.70784	2.06837	1.46028	0.566704	+	+			0.0194061	0.048854	0.133768	0.271193	NaN	NaN	-0.0682435	NaN	0.5106	0.321101	-0.00237027	NaN	3	2	3	2	3	1	0	1	0	0	1	0	0	0	0	0
CPSF3	Cleavage and polyadenylation specificity factor subunit 3	G5E9W3;Q9UKF6;C9JZH6	G5E9W3;Q9UKF6	1.64621	0.336944	0.357466	0					0.104537	0.393665	0.393035	0.5	0.357008	0.406253	0.0568558	NaN	0.21648	0.439199	0.273189	NaN	1	1	1	2	3	4	0	0	0	1	2	2	2	2	0	0
CPSF6	Cleavage and polyadenylation specificity factor subunit 6	Q16630-3;F8WJN3;Q16630;Q16630-2;F8W084	Q16630-3;F8WJN3;Q16630;Q16630-2	2.60794	0.373635	1.22939	0.783837	+				0.0232983	0.38241	0.175295	0.199718	0.285952	0.362005	0.00170898	0.288492	0.255572	0.448763	-0.106773	0.0749439	4	4	3	3	2	2	2	1	2	4	3	5	1	2	1	1
CPSF7	Cleavage and polyadenylation specificity factor subunit 7	F5H669;Q8N684-2;Q8N684;Q8N684-3;J3QT54;F5H6M0;F5H047;C9J286;C9J323;C9JM38;F5H5B7;F5H1W4;F5H2K8;F5H6P5;F5H6A8;F5GXA3	F5H669;Q8N684-2;Q8N684;Q8N684-3;J3QT54;F5H6M0;F5H047	2.39617	0.541144	1.75484	0.907769	+				0.0337474	0.332407	0.0913623	0.164568	0.565306	0.603391	0.0930499	0.743014	0.699495	0.809769	-0.0106192	0.256981	3	5	4	4	6	6	3	5	1	3	4	2	1	3	1	4
CRIP2	Cysteine-rich protein 2	H0YFA4;P52943;P52943-2;H0YHD8	H0YFA4;P52943;P52943-2;H0YHD8	-0.297519	-0.359996	-0.0709213	0.36487					0.589795	0.613417	0.521472	0.347442	NaN	NaN	-0.54227	0.164503	NaN	NaN	NaN	0.252541	0	0	0	0	0	1	1	1	0	0	0	0	1	0	0	1
CRNKL1	Crooked neck-like protein 1	Q9BZJ0-2;Q9BZJ0-3;Q5JY65;Q9BZJ0	Q9BZJ0-2;Q9BZJ0-3;Q5JY65;Q9BZJ0	-0.297519	-0.975867	-0.541718	-0.926562					0.589795	0.7827	0.659579	0.840389	NaN	0.893304	-0.199878	NaN	NaN	NaN	-0.118455	NaN	1	0	0	0	2	2	0	1	0	1	0	1	2	2	1	1
CROCC	Rootletin	B1AKD8;Q5TZA2;Q5TZA2-2;A0A087WW81;A0A087WU09	B1AKD8;Q5TZA2;Q5TZA2-2	-0.877539	-1.34911	-1.09709	0.0433881					0.748441	0.859971	0.797577	0.481399	0.387913	0.576187	-0.864695	0.779937	2.81394	0.38189	NaN	1.38237	1	0	1	1	0	0	1	1	1	1	1	1	1	1	1	1
CRTAP	Cartilage-associated protein	C9JP16;O75718	C9JP16;O75718	0.294579	-1.37763	-0.0970906	0.0734376					0.411077	0.864991	0.529383	0.468538	-1.14372	-2.34951	NaN	NaN	NaN	-2.21958	NaN	NaN	2	1	2	1	0	0	0	1	1	1	6	3	0	0	0	1
CS	Citrate synthase;Citrate synthase, mitochondrial	B4DJV2;O75390;A0A0C4DGI3;H0YIC4;F8VPF9;F8VPA1;F8VR34;F8VTT8;F8W1S4;F8W4S1;H0YH82;F8W642;F8W0J2;F8VZK9;F8VP03;F8VX07;F8VRP1;F8VX68;F8VWQ5;F8VRI6;F8VU34	B4DJV2;O75390;A0A0C4DGI3;H0YIC4	0.00230278	0.19069	-0.0970906	0.617717					0.499299	0.439326	0.529383	0.253329	0.386561	0.183177	-0.276569	0.384551	0.330481	0.128471	NaN	NaN	3	5	5	3	0	0	1	2	1	2	5	4	0	1	1	1
CSDE1	Cold shock domain-containing protein E1	O75534-2;O75534;O75534-3;O75534-4;E9PLT0;E9PNG3;E9PKN4;E9PLD4	O75534-2;O75534;O75534-3;O75534-4;E9PLT0	0.280273	1.26148	2.00753	1.1388					0.415329	0.156243	0.0637198	0.110435	-0.328349	-0.453878	0.0393334	-0.367497	-0.47338	-0.527831	0.128405	-0.45491	2	4	9	7	7	7	5	6	2	4	7	3	3	3	1	4
CSE1L	Exportin-2	P55060;P55060-3;P55060-4;P55060-2	P55060;P55060-3;P55060-4	1.04418	0.656792	1.30357	-0.203426					0.2128	0.299489	0.161143	0.586552	1.09116	0.967897	0.0102224	0.897879	1.13029	1.11054	0.0307743	0.866227	20	22	24	21	10	6	2	6	13	16	20	20	4	5	2	7
CSK	Tyrosine-protein kinase CSK	P41240;H3BU69;H3BUM9	P41240	1.01148	1.64719	-0.0970906	0					0.220119	0.0936101	0.529383	0.5	-0.105797	-0.186461	NaN	NaN	-0.234729	-0.208119	NaN	NaN	1	1	1	2	0	0	0	0	0	1	1	1	0	0	0	0
CSNK1A1;CSNK1A1L	Casein kinase I isoform alpha;Casein kinase I isoform alpha-like	P48729-3;P48729;D6REM4;P48729-2;E7ETM0;Q8N752;E5RG27;D6RGE5;U3KPX3;H0Y9X2;U3KQK7	P48729-3;P48729;D6REM4;P48729-2;E7ETM0;Q8N752	1.49443	2.04987	-0.0970906	0					0.127081	0.0503717	0.529383	0.5	-0.269814	-0.176521	NaN	NaN	0.738899	-0.301889	NaN	NaN	0	2	2	2	0	0	0	0	0	2	2	0	0	0	0	0
CSNK2A1;CSNK2A3	Casein kinase II subunit alpha;Casein kinase II subunit alpha 3	E7EU96;P68400;Q5U5J2;Q8NEV1;P68400-2;V9GYA2;V9GY80;A0A087WY74	E7EU96;P68400;Q5U5J2;Q8NEV1;P68400-2	3.50984	2.68852	1.27321	0	+	+			0.00370175	0.0156749	0.166841	0.5	1.02593	0.795934	0.16443	0.809856	0.850451	0.650069	-0.508165	NaN	6	5	10	3	0	2	0	0	1	1	1	1	0	0	0	1
CSNK2B;CSNK2B-LY6G5B-1181;CSNK2B-LY6G5B--991;CSNK2B-LY6G5B-562	Casein kinase II subunit beta	P67870;Q5SRQ6;Q5SRQ3;N0E472;N0E644	P67870;Q5SRQ6;Q5SRQ3;N0E472;N0E644	1.85562	1.69558	0.876223	0.795628					0.0784022	0.0872961	0.25293	0.196191	1.02158	0.559029	0.0539724	0.74173	0.729756	0.67326	0.0886801	NaN	2	3	2	2	2	1	0	2	0	2	1	0	0	1	1	1
CSRP1	Cysteine and glycine-rich protein 1	P21291;E9PND2;E9PS42;E9PP21	P21291;E9PND2;E9PS42;E9PP21	0.82904	0.118706	0.436958	0.420459					0.263502	0.46214	0.370031	0.325636	-1.41566	-0.821566	-0.938148	0.0165726	-1.40282	-0.716055	-0.902386	-0.0184195	9	10	10	11	8	10	8	9	7	7	7	7	9	10	8	9
CSRP2	Cysteine and glycine-rich protein 2	Q16527;F8VQR7;F8VW96	Q16527;F8VQR7;F8VW96	0.381001	0.543464	1.81174	1.09569					0.385634	0.331733	0.0844707	0.119424	-0.949442	-0.766229	-1.47305	0.490888	-1.24251	-1.12641	-1.38582	0.438316	5	5	7	5	5	7	4	6	5	2	4	4	3	5	4	5
CSTB	Cystatin-B	P04080	P04080	0.482772	1.39396	1.51495	0					0.356298	0.13219	0.125017	0.5	-0.631401	-0.276271	NaN	0.0569325	NaN	-0.0733643	-0.160507	NaN	1	1	2	1	1	1	0	0	1	1	2	1	0	0	0	1
CSTF1	Cleavage stimulation factor subunit 1	Q05048;A0A0A0MSZ9	Q05048;A0A0A0MSZ9	0.280273	2.62174	1.39837	1.60299		+		+	0.415329	0.0179023	0.144174	0.0424238	0.209245	0.190785	0.0521747	0.0588094	NaN	0.255737	0.0462336	0.0502328	0	1	4	3	2	2	2	1	0	0	1	2	2	1	0	1
CSTF3	Cleavage stimulation factor subunit 3	Q12996;Q12996-2;E9PLP8	Q12996	1.86766	0.375436	1.51495	0					0.0770659	0.38186	0.125017	0.5	0.476173	0.448684	0.113193	-0.514231	0.552723	NaN	-0.327848	NaN	2	2	1	1	1	2	1	0	1	0	2	0	0	0	0	0
CTBP1	C-terminal-binding protein 1	Q13363-2;Q13363;D6RAX2;E7ESU7;E7EPF8;H0Y8W7;E9PGB1;H0Y9M9;H0Y8U5;E7EUB3	Q13363-2;Q13363;D6RAX2;E7ESU7;E7EPF8;H0Y8W7	-0.234125	0.817971	-0.0709213	0					0.570892	0.256259	0.521472	0.5	-0.00591025	-0.0914844	0.182415	-0.184695	NaN	0.370282	NaN	NaN	1	0	3	4	0	1	0	0	1	1	3	2	1	0	0	0
CTBP2	C-terminal-binding protein 2	P56545;Q5SQP8;P56545-2;A0A087WYL1	P56545;Q5SQP8;P56545-2	0.0840548	-0.146818	-0.702926	-0.571419					0.474431	0.546789	0.703231	0.730484	0.201742	0.0107731	-0.0667396	0.0880673	0.259074	0.0518571	-0.13002	0.0663676	4	1	4	3	4	3	2	1	1	5	6	4	6	6	3	3
CTNNA1	Catenin alpha-1	P35221;P35221-2;G3XAM7;P35221-3;E5RG03;E5RIB1;E5RGY6;E5RHV7;E5RJ41;E5RFM3;E5RJL0;E5RIE0;P26232-4;A0A0A0MRI5;P26232-6;A0A0A0MTJ6;E5RJZ2;E5RIT8;H0YBB8;E5RGY7	P35221;P35221-2;G3XAM7	-0.936628	-3.77581	-0.68296	-2.60319					0.762597	0.998749	0.697965	0.997433	-0.811384	-0.719632	-0.388433	-0.20344	NaN	NaN	NaN	NaN	0	0	2	1	0	0	0	0	1	1	5	2	1	1	1	2
CTNNB1	Catenin beta-1	B4DGU4;P35222;P35222-2	B4DGU4;P35222	1.03723	0.711809	-0.681145	0					0.214343	0.284366	0.697484	0.5	-0.731495	-0.85714	-1.17736	0.0780392	-0.349577	-0.976847	NaN	NaN	3	1	2	2	0	0	0	0	0	0	1	0	0	1	0	0
CTNNBL1	Beta-catenin-like protein 1	Q8WYA6-3;Q8WYA6-2;Q8WYA6-4;Q8WYA6;A0A087WUB9	Q8WYA6-3;Q8WYA6-2;Q8WYA6-4;Q8WYA6;A0A087WUB9	0.280273	2.22497	-0.0970906	0		+			0.415329	0.0374192	0.529383	0.5	0.717993	0.520364	0.165704	0.408054	NaN	0.859247	NaN	NaN	0	1	1	1	0	0	0	0	0	0	0	1	0	0	0	0
CTNND1	Catenin delta-1	O60716-8;O60716-7;O60716-5;C9JZR2;O60716-3;O60716-6;O60716-4;O60716-2;O60716;O60716-24;O60716-23;O60716-21;O60716-19;O60716-22;O60716-20;O60716-16;O60716-18;O60716-15;O60716-17;O60716-13;O60716-11;O60716-14;O60716-12;O60716-10;O60716-9;O60716-32;O60716-31;O60716-29;O60716-27;O60716-30;O60716-28;O60716-26;O60716-25;E9PRE2;E9PKY0	O60716-8;O60716-7;O60716-5;C9JZR2;O60716-3;O60716-6;O60716-4;O60716-2;O60716;O60716-24;O60716-23;O60716-21;O60716-19;O60716-22;O60716-20;O60716-16;O60716-18;O60716-15;O60716-17;O60716-13;O60716-11;O60716-14;O60716-12;O60716-10;O60716-9;O60716-32;O60716-31;O60716-29;O60716-27;O60716-30;O60716-28;O60716-26;O60716-25	5.16775	5.91126	3.89262	3.4742	+	+	+	+	4.02e-05	1.11e-06	0.00156039	9.39e-05	-0.737786	-0.798015	-0.231121	0.287442	-0.93657	-0.663463	-0.689645	0.243656	14	10	16	10	5	4	4	3	0	0	0	0	0	0	0	0
CTPS1	CTP synthase 1	P17812;P17812-2	P17812;P17812-2	-1.1234	-0.799434	-0.0970906	1.27468					0.80433	0.738939	0.529383	0.0852991	1.05318	0.466939	-0.202365	1.13917	NaN	NaN	NaN	-0.985436	1	0	1	1	1	1	0	2	3	0	1	1	1	2	0	2
CTR9	RNA polymerase-associated protein CTR9 homolog	Q6PD62;H0YCE8	Q6PD62	0.294579	1.94734	2.48787	2.21165			+	+	0.411077	0.0594782	0.0294468	0.00871433	0.342245	0.130106	-0.0661901	NaN	NaN	0.216175	-0.0383628	-0.445974	1	0	3	3	2	2	3	0	0	0	1	0	0	0	0	0
CTSA	Lysosomal protective protein;Lysosomal protective protein 32 kDa chain;Lysosomal protective protein 20 kDa chain	P10619-2;P10619;X6R5C5;X6R8A1	P10619-2;P10619;X6R5C5;X6R8A1	-0.936628	0.622369	-0.0970906	0					0.762597	0.309133	0.529383	0.5	NaN	NaN	NaN	NaN	NaN	-1.45208	NaN	NaN	0	0	2	1	0	0	0	0	1	0	1	1	0	0	0	0
CTSB	Cathepsin B;Cathepsin B light chain;Cathepsin B heavy chain	P07858;E9PR54;E9PJ67;E9PCB3;E9PKQ7;E9PNL5;E9PHZ5;E9PLY3;E9PSG5;E9PQM1;R4GMQ5;E9PS78	P07858;E9PR54;E9PJ67;E9PCB3;E9PKQ7;E9PNL5;E9PHZ5;E9PLY3;E9PSG5;E9PQM1	-1.30573	-0.593337	0.460278	-0.000196233					0.840452	0.682629	0.363365	0.500084	NaN	NaN	4.27922	NaN	-1.28345	-0.672188	-0.596749	-0.23084	3	2	2	2	1	1	1	1	3	4	3	1	1	1	0	2
CTSD	Cathepsin D;Cathepsin D light chain;Cathepsin D heavy chain	P07339;C9JH19;H7C469;F8WD96;H7C1V0;F8W787	P07339;C9JH19;H7C469;F8WD96	-0.475367	0.106019	-1.53972	-0.368596					0.641594	0.466176	0.878814	0.654037	-1.58158	-1.19015	3.85767	NaN	-1.78943	-0.68529	NaN	-0.470573	5	8	5	4	1	1	3	3	5	7	5	3	2	3	3	4
CTTN	Src substrate cortactin	Q14247;Q14247-3;Q14247-2;H0YCD9;H0YEV2	Q14247;Q14247-3;Q14247-2	0.0912765	-0.0704167	0.165944	0.665708					0.472237	0.522481	0.449867	0.237107	-0.470298	-0.35731	-0.0877095	-0.245612	-0.677777	-0.463115	-0.118083	-0.230575	13	13	13	14	3	3	6	8	8	10	13	12	1	1	3	6
CUL2	Cullin-2	Q13617;A0A0A0MTN0;Q13617-2;Q5T2B5	Q13617;A0A0A0MTN0;Q13617-2;Q5T2B5	-0.297519	-0.913374	-0.460066	0					0.589795	0.767704	0.636575	0.5	0.770335	0.289682	0.487001	0.184977	NaN	NaN	0.479509	NaN	0	0	0	0	2	2	0	0	0	0	1	1	2	2	0	0
CUL3	Cullin-3	Q13618-2;Q13618;Q13618-3;A0A087WTG3;H7C399;H7C1L6;A0A087X1R9	Q13618-2;Q13618;Q13618-3;A0A087WTG3	-0.297519	1.00484	0.402935	-1.45521					0.589795	0.210543	0.379825	0.941133	NaN	-0.303665	NaN	0.22619	NaN	-0.304565	-0.268777	NaN	0	0	0	1	2	2	1	1	0	0	1	1	0	1	0	2
CUL4A	Cullin-4A	Q13619;Q13619-2;A0A0A0MR50;A0A087WWN2	Q13619;Q13619-2;A0A0A0MR50	-0.297519	-0.359996	0.209706	-0.493266					0.589795	0.613417	0.436746	0.702036	NaN	NaN	0.0343459	-0.498767	NaN	NaN	NaN	NaN	0	0	0	0	1	1	0	0	0	0	0	0	1	2	0	1
CUL4B	Cullin-4B	Q13620-3;Q13620-1;K4DI93;Q13620;A6NE76	Q13620-3;Q13620-1;K4DI93;Q13620	-1.50001	-0.139617	-1.45171	-1.03136					0.873804	0.544504	0.864824	0.866224	-0.270568	-0.157545	-0.193157	0.245876	-0.175569	-0.168367	0.0137524	-0.149495	5	5	7	8	2	5	1	2	2	6	7	7	5	8	2	4
CUL7	Cullin-7	Q14999;Q14999-2	Q14999;Q14999-2	-0.297519	1.39456	-0.0970906	0					0.589795	0.132088	0.529383	0.5	NaN	NaN	NaN	NaN	NaN	NaN	NaN	NaN	0	0	2	0	0	0	0	0	0	0	0	0	0	0	0	0
CUL9	Cullin-9	E9PEZ1;Q8IWT3;Q8IWT3-3	E9PEZ1;Q8IWT3;Q8IWT3-3	-0.297519	-0.359996	0.166489	0					0.589795	0.613417	0.449703	0.5	NaN	NaN	NaN	NaN	NaN	NaN	0.132037	NaN	0	0	1	0	1	1	0	0	0	0	0	0	1	1	0	0
CYB5R3	NADH-cytochrome b5 reductase 3;NADH-cytochrome b5 reductase 3 membrane-bound form;NADH-cytochrome b5 reductase 3 soluble form	P00387-2;P00387;P00387-3;B1AHF3	P00387-2;P00387;P00387-3;B1AHF3	-0.21355	-0.208067	-0.383869	-0.522362					0.56472	0.566154	0.614652	0.712786	-0.909735	-0.811373	-0.559102	-0.171753	-1.20364	-1.00568	-0.408041	-0.3764	4	4	6	5	5	6	5	7	4	5	7	6	4	6	6	8
CYCS	Cytochrome c	C9JFR7;P99999;CON__P62894	C9JFR7;P99999	-0.390936	-0.375533	-1.48505	-0.860174					0.617262	0.618169	0.870249	0.822437	0.301763	0.345568	-0.109238	0.353938	0.833199	0.557663	0.740413	NaN	2	2	3	2	1	1	1	1	2	2	2	2	1	1	1	1
CYFIP1	Cytoplasmic FMR1-interacting protein 1	Q7L576;Q7L576-2;Q7L576-3;H0YL50;A0A087WVZ5	Q7L576;Q7L576-2;Q7L576-3	4.02441	0.72895	0.622829	-1.34314	+				0.00106756	0.27973	0.318142	0.925614	-0.205234	-0.124954	-0.23068	0.31851	-0.318932	-0.0832259	-0.293665	0.339589	3	8	11	8	6	5	4	3	0	3	9	5	2	7	3	3
CYTH2;CYTH3;CYTH1	Cytohesin-2;Cytohesin-3;Cytohesin-1	Q99418-2;O43739-2;Q99418;O43739;A0A0D9SFG6;M0R2J0;F8W8E2;G5E9B7;Q15438-3;Q15438-2;Q15438	Q99418-2;O43739-2;Q99418;O43739;A0A0D9SFG6;M0R2J0;F8W8E2;G5E9B7;Q15438-3;Q15438-2;Q15438	0.294579	0.640004	-0.125592	-0.178189					0.411077	0.304175	0.537985	0.575954	1.91256	-1.12664	NaN	NaN	NaN	-0.499178	-0.865278	-0.00721634	1	0	1	1	2	0	0	1	0	0	0	1	1	1	0	2
DAB2	Disabled homolog 2	P98082-2;P98082-3;P98082;D6RFF7;D6REB1;D6RIA5	P98082-2;P98082-3;P98082	0.294579	0.150159	-0.232324	-0.52237					0.411077	0.452152	0.57001	0.712789	-2.00739	-1.66312	-0.461826	-0.168306	NaN	-2.08415	-1.37143	-0.175984	1	0	3	2	0	2	1	2	0	0	3	0	1	2	2	2
DAD1	Dolichyl-diphosphooligosaccharide--protein glycosyltransferase subunit DAD1	F5GXX5;P61803;F5H895;A0A0B4J239	F5GXX5;P61803;F5H895;A0A0B4J239	-0.564851	-0.822636	0.263242	0.215377					0.666766	0.744942	0.42079	0.408451	-0.363887	-0.515861	-0.0597471	-0.336315	0.0277411	-0.625456	0.315763	-0.2793	2	3	4	4	3	3	4	3	3	2	4	3	2	2	3	3
DARS	Aspartate--tRNA ligase, cytoplasmic	P14868;P14868-2;H7BZ35;C9J7S3;C9JLC1;H7C278;C9JQM9	P14868;P14868-2	-1.08085	-0.668159	-0.477758	-1.12876					0.795236	0.703665	0.641605	0.887517	0.112716	0.150878	0.0421682	0.284461	-0.302068	-0.0710244	-0.108744	0.105568	5	7	12	12	12	10	8	6	7	9	12	11	12	14	11	12
DAZAP1	DAZ-associated protein 1	Q96EP5-2;K7EQ55;K7EK33;Q96EP5;K7EQ02	Q96EP5-2;K7EQ55;K7EK33;Q96EP5;K7EQ02	3.05533	1.05932	2.34048	1.82495	+		+	+	0.00986817	0.198173	0.0377776	0.024891	0.413358	0.567379	0.0373039	0.292946	0.451567	0.659318	0.133214	0.147079	5	5	3	5	4	4	4	4	3	3	4	3	3	3	2	2
DBN1	Drebrin	Q16643;Q16643-3;D6R9W4;Q16643-2;D6RFI1;D6R9Q9;D6RCR4	Q16643;Q16643-3;D6R9W4;Q16643-2	0.105438	-0.674266	0.612166	-0.360367					0.467939	0.705354	0.321036	0.650769	-0.571187	-0.453246	-0.439354	-0.257621	-0.654915	-0.565137	-0.301035	-0.332412	4	4	9	4	2	3	2	3	4	4	10	4	3	2	4	5
DCD	Dermcidin;Survival-promoting peptide;DCD-1	P81605;P81605-2	P81605;P81605-2	-0.666948	-0.333047	-0.696087	-0.433296					0.69459	0.605134	0.701432	0.679319	NaN	3.9373	3.39573	3.22067	2.66938	3.5542	4.58193	NaN	2	2	4	2	2	2	0	1	2	2	2	2	3	2	1	1
DCLRE1B	5 exonuclease Apollo	Q9H816	Q9H816	2.59065	3.74866	6.40002	5.66117	+	+	+	+	0.0240345	0.00134361	5.89e-07	5.8e-10	NaN	NaN	NaN	NaN	1.94718	1.27674	-0.130392	1.54229	0	6	4	8	15	12	10	7	0	0	0	0	0	0	0	0
DCTD	Deoxycytidylate deaminase	P32321;P32321-2;D6RBJ9	P32321;P32321-2;D6RBJ9	2.02011	0.909758	1.07776	0.685705					0.0616079	0.233181	0.206588	0.230519	-0.698261	-0.590585	0.256051	NaN	-0.537756	-0.346922	-0.0309118	-0.308247	2	3	3	3	3	3	1	3	0	1	3	3	2	2	0	2
DCTN1;DKFZp686E0752	Dynactin subunit 1	Q14203-3;Q14203-4;E7EX90;Q14203-6;Q14203;Q14203-5;Q14203-2;Q6AWB1;E7EWF7;C9JZA4;C9JTE5;C9JJN7;C9JJD0;C9JKG6;E9PCY0;C9J1B7	Q14203-3;Q14203-4;E7EX90;Q14203-6;Q14203;Q14203-5;Q14203-2;Q6AWB1	0.280273	-1.71868	1.17478	0.506734					0.415329	0.915603	0.1862	0.292966	-0.503912	-0.235282	0.312308	0.069032	NaN	-0.283896	-0.442374	NaN	0	1	4	2	1	0	1	1	0	0	7	5	0	0	0	1
DCTN2	Dynactin subunit 2	Q13561;Q13561-3;Q13561-2;H0YI98;F8W1I6;F8VW18;H0YHL1;F8VX93;F8VRV7	Q13561;Q13561-3;Q13561-2;H0YI98;F8W1I6;F8VW18	-0.297519	-0.917838	-0.0970906	0					0.589795	0.768794	0.529383	0.5	-0.650738	-0.281537	-0.083977	0.0881645	NaN	-0.147344	NaN	NaN	0	0	3	2	1	0	0	0	0	1	3	2	0	0	1	0
DDB1	DNA damage-binding protein 1	Q16531;F5GY55;Q16531-2;F5H2L3;F5H581;F5H6C5;F5H238;F5GWI0;F5GZY8;F5H775;F5H4N9;F5H0Y5;F5GYG8;F5GZ34;F8WF81;F5H7A0;F5H198	Q16531;F5GY55	1.3603	-0.359996	0.582	0.832115					0.149646	0.613417	0.329281	0.18552	0.125629	0.119216	-0.210602	0.495646	-0.503194	-0.51407	-0.085105	0.127733	3	1	3	3	13	13	9	1	1	2	2	0	8	9	3	1
DDOST	Dolichyl-diphosphooligosaccharide--protein glycosyltransferase 48 kDa subunit	A0A0C4DGS1;P39656;P39656-3;P39656-2;U3KQ84	A0A0C4DGS1;P39656;P39656-3;P39656-2;U3KQ84	-0.472974	-0.431491	-2.08002	-0.423483					0.640911	0.635133	0.942868	0.675534	-0.503704	-0.742494	0.0351163	-0.500724	-0.69998	-0.787928	0.227832	-0.53052	8	8	9	9	4	1	6	6	5	8	10	8	4	3	6	6
DDX1	ATP-dependent RNA helicase DDX1	Q92499;F1T0B3;A0A087X2G1;Q92499-3;Q92499-2	Q92499;F1T0B3;A0A087X2G1;Q92499-3;Q92499-2	0.890116	-0.00572345	0.910742	1.36608					0.248509	0.501828	0.244624	0.0709789	-0.1116	0.0469197	0.0636595	-0.105373	-0.184318	0.04906	0.106507	-0.0371109	19	17	19	19	21	18	21	19	13	13	20	17	15	12	8	15
DDX17	Probable ATP-dependent RNA helicase DDX17	Q92841;H3BLZ8;Q92841-1;Q92841-3;Q92841-2	Q92841;H3BLZ8;Q92841-1;Q92841-3;Q92841-2	0.797393	-0.247191	0.306791	0.921077					0.271448	0.578445	0.407904	0.161047	0.370901	0.394113	-0.0992665	0	0.321791	0.451684	-0.0950301	-0.0175167	14	15	13	13	14	16	14	14	12	13	13	13	12	14	8	11
DDX21	Nucleolar RNA helicase 2	Q9NR30;Q9NR30-2	Q9NR30;Q9NR30-2	0.592	-0.359996	-0.510184	0					0.325737	0.613417	0.650759	0.5	1.36746	0.98171	0.323033	0.341317	1.32	NaN	0.394379	-0.702785	4	3	0	0	7	5	2	1	3	4	0	1	5	7	0	0
DDX23	Probable ATP-dependent RNA helicase DDX23	Q9BUQ8;H0YI52;F8VVA2	Q9BUQ8	2.16386	0.904313	2.12167	-0.671177	+				0.0493589	0.234517	0.0535967	0.764705	0.380731	0.46686	0.0934694	0.431059	0.385255	0.281459	-0.0255701	NaN	3	4	3	4	6	3	0	0	2	1	2	2	1	3	1	0
DDX24	ATP-dependent RNA helicase DDX24	G3V529;Q9GZR7;Q9GZR7-2;F5GYL3;A0A087WXU8	G3V529;Q9GZR7;Q9GZR7-2;F5GYL3;A0A087WXU8	-0.297519	-0.359996	2.20834	0			+		0.589795	0.613417	0.0467959	0.5	1.10294	0.775097	0.26506	-0.306374	NaN	NaN	0.0953856	NaN	0	0	0	0	3	2	1	0	0	0	0	0	1	0	1	0
DDX39A	ATP-dependent RNA helicase DDX39A	O00148;O00148-2;K7EQN7;O00148-3;K7EPJ3	O00148;O00148-2;K7EQN7;O00148-3	-1.82622	-1.49155	-0.0526328	0.922829					0.918261	0.883807	0.515939	0.160588	1.48442	1.30709	0.0819468	1.06586	1.80337	1.05223	0.0605279	1.23069	2	1	1	1	4	4	2	2	2	2	1	2	4	3	3	2
DDX39B	Spliceosome RNA helicase DDX39B	Q13838;Q13838-2;Q5STU3;F6WLT2;A0A0A0MT12;F6TRA5;F6UJC5;F6S4E6;F6R6M7;H0Y400;F6QYI9;H0YCC6;F6U6E2;F6S2B7;K7EN69;K7ENP6;K7EL56;K7EIL8;F6SXL5	Q13838;Q13838-2;Q5STU3;F6WLT2;A0A0A0MT12;F6TRA5;F6UJC5;F6S4E6	-0.414419	-0.191859	-0.187279	-0.152678					0.624081	0.561043	0.556538	0.565186	0.75795	0.648751	0.022939	0.181582	0.494697	0.590031	0.0759506	0.0175935	17	17	17	15	20	19	18	19	18	19	18	18	22	22	20	19
DDX3X	ATP-dependent RNA helicase DDX3X	A0A0D9SFB3;O00571-2;A0A0D9SG12;O00571;A0A0D9SF53;A0A087WVZ1;C9J8G5;B4DLA0;D6RCM4;Q9NQI0-3;Q9NQI0-2;Q9NQI0-4;Q9NQI0	A0A0D9SFB3;O00571-2;A0A0D9SG12;O00571;A0A0D9SF53	0.024428	-0.0444163	0.0188825	0.285456					0.492564	0.514184	0.494281	0.379472	0.324709	0.144391	-0.0160129	-0.180971	0.0964754	0.0850625	-0.0893552	-0.191932	15	14	21	18	13	11	10	12	14	15	19	18	11	12	11	13
DDX42	ATP-dependent RNA helicase DDX42	A0A0A0MSJ0;Q86XP3-2;Q86XP3	A0A0A0MSJ0;Q86XP3-2;Q86XP3	0.809668	1.28716	2.6985	0			+		0.268352	0.151368	0.0202352	0.5	0.509269	0.343501	-0.0787019	0.200568	0.431831	0.338649	-0.287376	NaN	3	2	3	6	3	3	0	0	0	3	3	2	0	0	0	0
DDX46	Probable ATP-dependent RNA helicase DDX46	Q7L014;A0A0C4DG89;D6RJA6	Q7L014;A0A0C4DG89	1.71728	0.802959	0.535756	0.655185					0.0950402	0.260144	0.342082	0.240614	0.507094	0.409645	0.105561	0.290386	0.389814	0.488	0.183643	0.175346	5	9	7	9	9	10	5	3	1	6	7	4	8	6	1	5
DDX5	Probable ATP-dependent RNA helicase DDX5	P17844;J3KTA4;P17844-2;J3QSF1;J3KRZ1;J3QRQ7;J3QR02;J3KRX8;X6RLV5;J3QKN9;J3QRN5	P17844;J3KTA4;P17844-2	0.10076	-0.0618701	0.159615	0.534729					0.469358	0.519754	0.451769	0.282701	0.604751	0.266604	0.0744149	-0.319579	0.479832	0.364249	0.0774067	-0.333584	23	26	23	22	24	23	20	17	22	23	24	22	24	23	15	15
DDX6	Probable ATP-dependent RNA helicase DDX6	P26196;Q8IV96	P26196	-1.09879	-0.873983	-0.313656	-0.090945					0.799101	0.757964	0.594119	0.538941	0.132517	-0.0178943	0.028749	-0.0944077	-0.102872	-0.00288213	-0.063314	-0.140726	6	6	8	8	7	6	5	7	5	8	9	8	6	7	5	8
DDX60L	Probable ATP-dependent RNA helicase DDX60-like	Q5H9U9;Q5H9U9-2	Q5H9U9;Q5H9U9-2	0.280273	1.91771	3.22484	3.80735			+	+	0.415329	0.0623374	0.00717163	2.13e-05	NaN	NaN	NaN	NaN	1.35658	0.955922	0.168005	0.261818	1	1	2	1	1	1	1	1	0	0	0	0	0	0	0	0
DECR1	2,4-dienoyl-CoA reductase, mitochondrial	Q16698-2;Q16698;E5RJG7;E5RFV2;E5RJD2;E5RID6;H0YAW3	Q16698-2;Q16698;E5RJG7;E5RFV2	-0.352575	-0.470937	-0.182598	0.078803					0.606046	0.646937	0.555134	0.466245	-0.69774	-0.687896	NaN	-0.830726	-1.08463	-0.861681	0.0359806	-1.17347	6	6	6	8	2	2	7	6	7	7	8	9	1	5	6	4
DEFA3;DEFA1	Neutrophil defensin 3;HP 3-56;Neutrophil defensin 2;Neutrophil defensin 1;HP 1-56;Neutrophil defensin 2	P59666;P59665	P59666;P59665	-2.21851	-0.703399	-1.09709	0					0.954753	0.713346	0.797577	0.5	3.50351	NaN	3.82288	NaN	NaN	NaN	NaN	NaN	0	0	1	1	0	0	0	0	2	0	2	1	1	1	0	0
DEK	Protein DEK	P35659;B4DFG0;P35659-2;D6RDA2;D6R9L5;H0Y993;H0Y8X0	P35659;B4DFG0;P35659-2;D6RDA2	-0.414157	0.325781	1.45937	1.99078				+	0.624005	0.397107	0.133916	0.0161732	1.41991	1.20209	-0.0107151	1.24785	1.23264	1.16241	0.216384	0.633626	2	4	2	2	4	2	4	5	2	4	2	3	1	3	2	1
DHX15	Putative pre-mRNA-splicing factor ATP-dependent RNA helicase DHX15	O43143	O43143	0.100986	0.0655791	0.119552	1.61012				+	0.46929	0.479062	0.463836	0.0417361	0.74029	0.689226	0.0940049	0.699186	0.643093	0.677121	0.155045	0.574049	10	12	10	10	16	12	12	10	10	8	12	9	12	14	6	9
DHX30	Putative ATP-dependent RNA helicase DHX30	Q7L2E3-2;Q7L2E3-3;H7BXY3;Q7L2E3	Q7L2E3-2;Q7L2E3-3;H7BXY3;Q7L2E3	-0.297519	1.17238	-0.0970906	0					0.589795	0.173946	0.529383	0.5	0.334483	-0.100669	0.260018	-0.406569	NaN	-0.115695	NaN	NaN	0	0	4	4	1	0	0	0	0	0	2	2	0	0	0	0
DHX9	ATP-dependent RNA helicase A	Q08211;Q08211-2	Q08211	-0.032831	-0.250859	0.0725705	0.178234					0.509993	0.579594	0.478029	0.424027	0.738394	0.680936	0.123144	0.286279	0.526349	0.769582	0.142293	0.26571	32	34	34	35	39	41	30	28	31	34	36	34	35	38	26	29
DIS3	Exosome complex exonuclease RRP44	Q9Y2L1;G3V1J5;Q9Y2L1-2;F2Z2C0	Q9Y2L1;G3V1J5;Q9Y2L1-2	0.702481	2.45769	-0.125592	0		+			0.295973	0.0245462	0.537985	0.5	0.773634	0.682436	0.238282	0.277677	NaN	0.426565	0.117297	NaN	1	1	3	4	2	3	0	0	0	0	0	2	1	0	0	0
DKC1	H/ACA ribonucleoprotein complex subunit 4	O60832;O60832-2;C9IYT0;H7C0M1;H7C2Q9;H7C2Q2;H7BZF2	O60832;O60832-2;C9IYT0;H7C0M1	-0.297519	-0.359996	-1.2387	0.615509					0.589795	0.613417	0.826523	0.254089	0.404851	0.224994	0.0761721	-0.208585	NaN	NaN	0.126175	-0.0129124	0	0	0	0	1	1	0	1	0	0	1	1	2	1	0	1
DKFZp686J1372;TPM3	Tropomyosin alpha-3 chain	P06753-2;Q5HYB6;P06753-5;A0A087WWU8;Q5VU61;P06753-3;P06753-6;P06753-4;P06753-7;D6R904;K7EP68;D6RFM2	P06753-2;Q5HYB6;P06753-5;A0A087WWU8;Q5VU61;P06753-3;P06753-6;P06753-4;P06753-7	-0.390868	-1.16505	-0.829362	0.0630394					0.617242	0.824543	0.73556	0.472985	-0.334625	-0.0788905	-0.512613	0.440568	-0.663824	-0.201231	-0.542375	0.411463	9	11	15	8	11	9	6	10	9	8	12	13	10	5	11	8
DLAT	Dihydrolipoyllysine-residue acetyltransferase component of pyruvate dehydrogenase complex, mitochondrial	P10515;H0YDD4;E9PEJ4	P10515;H0YDD4;E9PEJ4	1.55186	-0.20002	-0.0970906	0					0.118183	0.563618	0.529383	0.5	0.292673	0.334381	NaN	NaN	0.451661	0.0889296	NaN	NaN	1	5	3	1	0	0	0	0	2	2	3	1	0	0	0	0
DLD	Dihydrolipoyl dehydrogenase, mitochondrial	P09622;P09622-3;E9PEX6;P09622-2;F8WDM5;F2Z2E3	P09622;P09622-3;E9PEX6;P09622-2	6.17938	3.31894	6.27894	6.71476	+	+	+	+	1.21e-06	0.00393772	9.33e-07	2.63e-13	-0.033367	-0.0436652	NaN	NaN	0.0365335	-0.0397232	-0.096245	0.0664758	11	13	13	10	10	12	12	12	2	1	5	1	1	2	1	1
DLST	Dihydrolipoyllysine-residue succinyltransferase component of 2-oxoglutarate dehydrogenase complex, mitochondrial	P36957;P36957-2;Q86SW4;H0YJF9;G3V5M3;G3V3F0	P36957;P36957-2	-0.0746569	0.0385267	1.08056	0.198427					0.522714	0.487696	0.205982	0.415543	0.0303726	0.079966	NaN	-0.235556	-0.122517	0.12065	-0.207524	0.00954953	5	10	9	7	1	1	2	4	5	8	9	6	2	1	1	5
DNAJA1	DnaJ homolog subfamily A member 1	P31689;P31689-2	P31689;P31689-2	-0.672518	0.534203	0.474141	0.274676					0.696078	0.334428	0.359422	0.383891	0.18963	0.0675255	0.107697	-0.0449486	0.232012	0.179106	0.220915	-0.11998	2	2	3	2	4	2	1	2	2	3	3	2	2	3	1	2
DNAJB1	DnaJ homolog subfamily B member 1	P25685;P25685-2;M0R080;M0QYT3;M0QXK0;M0R1D6;M0QZD0;M0R128	P25685;P25685-2;M0R080	1.62735	0.556978	-0.125592	0					0.10717	0.327816	0.537985	0.5	0.634812	0.0830707	-0.40955	0.532865	0.823345	0.3444	NaN	NaN	1	3	4	3	1	1	1	0	3	1	4	4	1	0	0	0
DNAJB4	DnaJ homolog subfamily B member 4	Q9UDY4;C9JUL4	Q9UDY4	-0.297519	-1.53824	-0.0970906	0					0.589795	0.890954	0.529383	0.5	-1.29794	-1.52157	-1.31132	0.739754	NaN	-1.15704	NaN	NaN	0	0	2	0	0	0	0	0	0	0	2	0	1	1	0	0
DNAJC11	DnaJ homolog subfamily C member 11	Q9NVH1;Q9NVH1-3;Q9NVH1-2;B1AK20;Q5TH61	Q9NVH1;Q9NVH1-3;Q9NVH1-2	-2.378	-4.00906	-1.42065	-2.84494					0.965199	0.999336	0.859632	0.998887	-0.336444	-0.583933	-0.162853	-0.214772	NaN	NaN	NaN	NaN	0	0	0	0	0	0	0	1	2	2	7	5	2	0	3	2
DNAJC13	DnaJ homolog subfamily C member 13	O75165;H0YA63;H0Y8Q2	O75165	0.372677	1.46176	0.514948	0.566704					0.388065	0.120924	0.347903	0.271193	-0.746624	-0.607956	NaN	-0.362308	-0.837886	-0.532957	NaN	NaN	1	1	4	6	0	1	0	1	2	1	4	0	0	0	0	0
DNAJC8	DnaJ homolog subfamily C member 8	O75937;S4R3J5	O75937	2.28744	0.647189	1.65047	0	+				0.0404577	0.302166	0.105072	0.5	0.832556	0.392738	-0.0630625	0.70226	0.719687	0.554815	0.234135	NaN	4	2	1	1	3	1	0	0	0	0	1	1	0	1	0	0
DNAJC9	DnaJ homolog subfamily C member 9	Q8WXX5	Q8WXX5	-0.234125	0.248961	0.541526	0.566704					0.570892	0.421001	0.340474	0.271193	1.76313	1.117	-0.214204	1.91112	NaN	-0.223604	1.20257	1.22288	2	0	2	1	1	3	1	2	0	1	1	1	2	1	1	1
DNM1L	Dynamin-1-like protein	O00429-4;O00429-5;O00429-3;G8JLD5;O00429-2;O00429;O00429-8;O00429-6;O00429-7;F8VZ52;H0YHY4;F8VR28;F8VYL3;B4DPZ9;F8W1W3;B4DDQ3;H0YI79;F8VUJ9	O00429-4;O00429-5;O00429-3;G8JLD5;O00429-2;O00429;O00429-8;O00429-6;O00429-7	-0.234125	-0.225777	-0.0970906	0					0.570892	0.571727	0.529383	0.5	-0.566329	-0.271247	0.405391	-0.576376	NaN	-0.10467	NaN	NaN	1	0	3	1	0	0	0	0	0	1	3	2	0	0	0	0
DNM2	Dynamin-2	P50570-2;P50570-5;P50570;P50570-3;P50570-4;K7EMQ3;A0A0D9SFB1;Q05193-5;Q05193-3;Q05193-2;Q05193;A0A0D9SFE4;Q9UQ16-5;E5RHK8;Q9UQ16-2;Q9UQ16-3;Q9UQ16;Q9UQ16-4;E5RIK2;K7EPK9;H7C5U0	P50570-2;P50570-5;P50570;P50570-3;P50570-4	4.74753	1.39919	-0.805345	0.369336	+				0.000145869	0.131297	0.729559	0.34567	-0.180591	0.0014604	-0.1073	0.290506	-0.214262	-0.0605011	-0.0953942	0.68519	15	10	13	15	3	2	1	2	1	1	9	6	2	4	1	3
DNMT1	DNA (cytosine-5)-methyltransferase 1	P26358;P26358-2;P26358-3;K7ENW7;K7ENQ6;K7EJL0;K7EIZ6;K7ERQ1;K7EMU8;K7ELB1	P26358;P26358-2;P26358-3	1.29458	0.447359	0.914262	0.860956					0.161623	0.360103	0.243785	0.177345	1.15761	0.745511	0.066355	0.60617	NaN	0.940894	0.146525	NaN	2	1	4	4	11	7	1	0	0	1	3	2	6	6	0	1
DOCK7	Dedicator of cytokinesis protein 7	Q96N67-4;Q96N67-3;Q96N67-5;Q96N67-2;Q96N67-6;Q96N67;H0Y7L2;A0A0C4DGY6;Q96N67-7;Q96HP0	Q96N67-4;Q96N67-3;Q96N67-5;Q96N67-2;Q96N67-6;Q96N67;H0Y7L2	2.48815	1.57249	-0.0429526	0.615509	+				0.0288119	0.104008	0.513008	0.254089	-0.0920944	-0.00266735	-0.112309	0.302775	-0.252728	-0.0689156	-0.0342851	0.157346	8	10	13	11	10	9	2	6	1	2	8	4	5	6	2	2
DPYSL2	Dihydropyrimidinase-related protein 2	Q16555-2;Q16555;E5RFU4	Q16555-2;Q16555	0.0849286	-0.151956	0.692361	-0.235744					0.474165	0.548418	0.29955	0.60003	-0.969082	-0.653823	-0.375332	-0.185223	-1.25503	-0.673893	-0.26631	-0.137338	8	7	11	12	6	5	7	10	6	10	12	12	2	6	7	10
DPYSL3	Dihydropyrimidinase-related protein 3	Q14195-2;Q14195;H0YBT4;D6RF19;Q14117	Q14195-2;Q14195	-0.0438781	-0.466555	-0.643557	-0.0668412					0.513354	0.645632	0.687451	0.528641	0.111518	-0.226708	0.522273	-0.310607	0.41183	-0.274681	0.58922	-0.291805	10	12	18	18	6	8	11	14	7	12	20	17	7	10	12	19
DRG1	Developmentally-regulated GTP-binding protein 1	Q9Y295	Q9Y295	0.281583	0.336944	-0.0970906	0.136461					0.414939	0.393665	0.529383	0.441686	-0.00661636	0.307262	0.463842	-0.088945	0.233498	0.017254	NaN	0.355686	2	3	2	2	0	0	0	2	2	1	3	2	0	0	0	1
DSC1	Desmocollin-1	Q08554-2;Q08554	Q08554-2;Q08554	-2.21851	-0.781891	-0.523082	0.860956					0.954753	0.734354	0.654377	0.177345	NaN	NaN	-3.48296	NaN	NaN	-0.850802	2.39725	NaN	0	0	5	1	2	1	1	0	3	0	4	4	6	2	0	1
DSC3	Desmocollin-3	Q14574-2;Q14574	Q14574-2;Q14574	-0.297519	-0.359996	-1.90639	0.602993					0.589795	0.613417	0.926119	0.258421	NaN	NaN	NaN	NaN	NaN	NaN	NaN	NaN	0	0	0	0	0	0	1	0	0	0	0	0	2	0	0	0
DSG1	Desmoglein-1	Q02413;Q02413-2	Q02413	-1.1377	-0.621532	-0.49438	1.64144				+	0.807332	0.690631	0.646308	0.038819	NaN	1.65497	0.195846	-2.5384	NaN	2.17481	1.90214	-4.50329	0	1	8	4	9	7	5	0	2	0	8	8	13	6	1	2
DSP	Desmoplakin	P15924;P15924-3;P15924-2	P15924;P15924-3;P15924-2	-0.0690013	-0.946828	-0.953705	2.51476				+	0.520995	0.775802	0.765506	0.00343188	-0.20264	-0.431292	-0.0919853	-0.726061	-0.841738	-0.754373	-0.922123	-0.509744	2	8	27	14	21	8	26	0	5	3	35	24	41	13	1	5
DSTN	Destrin	P60981;P60981-2;F6RFD5	P60981;P60981-2;F6RFD5	0.577957	0.703603	0.105379	-0.260825					0.329606	0.286598	0.468114	0.61041	-0.953688	-0.792624	-0.0103278	-0.61508	-0.735383	-0.651347	0.0282111	-0.699101	6	5	9	6	4	4	3	4	3	2	5	5	3	2	4	5
DTD1	D-tyrosyl-tRNA(Tyr) deacylase 1	Q8TEA8;A0A087WZV9	Q8TEA8	-2.378	-3.47295	-2.26671	-1.95203					0.965199	0.997288	0.957381	0.982067	0.295522	0.487755	0.179013	0.355035	NaN	NaN	NaN	0.620398	0	0	0	2	1	1	1	2	2	1	2	4	2	3	2	2
DTX3L	E3 ubiquitin-protein ligase DTX3L	Q8TDB6;Q8TDB6-2	Q8TDB6	2.86524	2.67585	-0.0970906	0	+	+			0.0143978	0.0160783	0.529383	0.5	NaN	NaN	NaN	NaN	0.363033	1.09505	NaN	NaN	4	5	2	6	0	0	0	0	0	0	0	0	0	0	0	0
DTYMK	Thymidylate kinase	P23919;P23919-2;H7BZ20;G5E9E9;H7C312;H7C3A4	P23919;P23919-2	1.48881	2.76903	1.90382	0.724789		+			0.127976	0.0133093	0.0741549	0.217945	0.0764148	0.381565	0.035145	-0.083674	0.0922062	-0.216853	0.67062	0.023287	3	3	4	2	2	1	3	3	1	1	1	0	0	1	1	1
DUSP3	Dual specificity protein phosphatase 3	P51452-2;P51452;K7ES89;K7ELG5	P51452-2;P51452;K7ES89;K7ELG5	2.27307	1.46363	0.514948	0	+				0.041421	0.120623	0.347903	0.5	-0.522583	-0.0280639	-0.0284351	0.399922	0.0183475	0.212324	0.0565201	NaN	1	2	4	3	0	1	0	0	0	2	1	2	0	0	0	0
DUT	Deoxyuridine 5-triphosphate nucleotidohydrolase, mitochondrial	A0A0C4DGL3;P33316-2;H0YNW5;H0YKC5;P33316;H0YMM5;H0YNJ9;H0YKI0;H0YMP1	A0A0C4DGL3;P33316-2;H0YNW5;H0YKC5;P33316;H0YMM5;H0YNJ9;H0YKI0;H0YMP1	0.372366	0.84118	-0.0970906	0.602993					0.388156	0.250313	0.529383	0.258421	0.684845	1.26164	-0.152706	1.05361	NaN	1.09473	NaN	NaN	0	1	2	0	0	0	1	0	1	0	1	0	0	0	0	0
DYNC1H1	Cytoplasmic dynein 1 heavy chain 1	Q14204;H0YJ21	Q14204	-0.952196	-0.465279	-0.338667	-0.0651171					0.766252	0.645252	0.601466	0.527904	-0.208853	-0.016719	-0.0431887	0.237967	-0.393199	-0.0735987	-0.000839016	0.285512	47	53	95	78	37	47	38	46	63	64	115	80	32	37	29	54
DYNC1I2	Cytoplasmic dynein 1 intermediate chain 2	Q13409-6;Q13409-3;Q13409-7;Q13409-2;Q13409-5;Q13409;E7EQL5;E7EV09;E7EQU2;E7ESD3;E7EMU4;E9PGG1;E7EUM4;E7ERR6;E7ERH4;E7ET01;E7ETL8;E7EU01	Q13409-6;Q13409-3;Q13409-7;Q13409-2;Q13409-5;Q13409;E7EQL5;E7EV09	-0.826222	0.517705	1.46401	2.94686				+	0.735795	0.339251	0.133158	0.000767755	0.059899	-0.0183098	-0.0194369	0.181245	NaN	-0.593086	0.118081	0.181315	0	0	2	2	6	6	8	6	0	1	1	1	3	2	3	3
DYNLL1	Dynein light chain 1, cytoplasmic	P63167;F8VXL2;F8VRV5;F8VXI7	P63167	-0.162305	-0.151307	0.705488	-0.133151					0.549281	0.548212	0.296096	0.55691	-0.0169237	-0.160107	-0.0926572	-0.239912	0.193837	-0.0201145	-0.0138937	-0.183202	4	2	3	3	3	3	3	1	2	2	3	3	3	3	2	3
DYNLRB1;DYNLRB2	Dynein light chain roadblock-type 1;Dynein light chain roadblock-type 2	Q9NP97;Q8TF09;B1AKR6;H3BNG9;H3BPA0;Q9NP97-2;Q7Z4M1;H3BQI1	Q9NP97;Q8TF09;B1AKR6	1.03723	1.19896	1.46028	0.0734376					0.214343	0.168536	0.133768	0.468538	-0.0560298	-0.0545624	-0.0230507	0.21181	-0.238448	-0.670628	0.341193	NaN	2	0	2	0	1	1	1	1	0	0	1	1	1	0	0	1
DYNLT1	Dynein light chain Tctex-type 1	P63172;Q5VTU3	P63172;Q5VTU3	-0.924448	-0.20002	-0.420651	-0.493266					0.759715	0.563618	0.625285	0.702036	0.296361	0.156739	NaN	NaN	NaN	0.45229	NaN	NaN	1	0	2	1	1	1	0	0	0	1	2	1	1	1	0	1
ECM29;KIAA0368	Proteasome-associated protein ECM29 homolog	Q5VYK3;J3KN16;R4GMY1;F6XAQ5;R4GMY3	Q5VYK3;J3KN16	0.192124	2.19534	1.27321	0		+			0.441725	0.0393965	0.166841	0.5	0.0467833	0.130618	0.191491	-0.097974	0.0437403	0.200442	-0.14894	NaN	6	7	9	6	1	1	0	0	2	5	5	4	1	1	0	1
EDF1	Endothelial differentiation-related factor 1	O60869-2;O60869-3;O60869	O60869-2;O60869-3;O60869	0.631257	-0.15818	0.929079	0.860956					0.31502	0.550391	0.240272	0.177345	0.122593	0.403663	0.0104475	0.0361257	0.217049	0.426371	0.174091	NaN	4	3	2	3	2	2	1	0	2	3	1	3	1	0	0	1
EEA1	Early endosome antigen 1	Q15075	Q15075	0.280273	0.634832	-0.0970906	0					0.415329	0.305626	0.529383	0.5	-0.233939	-0.284923	-1.74378	-0.900408	NaN	-0.675794	NaN	NaN	0	1	7	4	0	0	0	0	0	1	3	3	0	0	0	0
EEF1A1;EEF1A1P5	Elongation factor 1-alpha 1;Putative elongation factor 1-alpha-like 3	P68104;Q5VTE0;P68104-2;A0A087WVQ9;A0A087WV01;Q5JR01;A6PW80	P68104;Q5VTE0;P68104-2;A0A087WVQ9;A0A087WV01	-0.0809747	-0.214255	0.0113526	0.00105277					0.524634	0.568103	0.496561	0.499549	0.069096	-0.113523	0.157989	-0.291739	0.0465385	-0.0813455	0.114066	-0.259147	17	18	19	18	13	14	12	13	17	17	18	17	15	15	13	15
EEF1B2	Elongation factor 1-beta	P24534;C9JZW3;F2Z2G2;F8WF65	P24534	1.48227	0.862377	2.74013	1.15337			+		0.129023	0.244948	0.0187387	0.10751	0.126947	-0.14901	0.228412	-0.437306	-0.0302271	-0.153985	0.324293	-0.394882	4	6	6	5	5	5	3	2	3	3	4	4	1	0	1	2
EEF1D	Elongation factor 1-delta	P29692;P29692-3;P29692-2;E9PRY8;E9PQZ1;E9PK01;P29692-4;A0A087X1X7;H0YE72;E9PQ49;E9PI39;E9PL71;H0YE58;E9PPR1;E9PL12;E9PMW7;E9PN91;E9PIZ1;H0YCK7;E9PK06;E9PKK3;E9PK72;E9PNW6;E9PQC9;E9PJD0	P29692;P29692-3;P29692-2;E9PRY8;E9PQZ1;E9PK01;P29692-4;A0A087X1X7;H0YE72;E9PQ49;E9PI39;E9PL71	0.499818	0.0495438	-0.25117	-0.494783					0.351461	0.484179	0.575623	0.7026	-0.230476	-0.271026	0.0898612	-0.392995	-0.287288	-0.269322	0.252729	-0.445826	10	9	11	10	7	6	5	5	7	11	10	10	5	6	5	5
EEF1E1;hCG_2043275	Eukaryotic translation elongation factor 1 epsilon-1	O43324;O43324-2;D6RBD7;C9J1V9;H0YAL7;D6RCQ0;H0YAH9	O43324;O43324-2;D6RBD7;C9J1V9;H0YAL7	-0.67774	0.0406303	-0.0970906	-0.000196233					0.697471	0.487024	0.529383	0.500084	0.00515419	0.116141	0.136691	0.071809	-0.167864	0.149508	NaN	NaN	2	3	5	5	0	1	1	1	3	3	2	6	1	1	0	2
EEF1G	Elongation factor 1-gamma	P26641;P26641-2	P26641;P26641-2	-0.0143517	0.189906	-0.0824211	0.0973122					0.504369	0.439573	0.52495	0.458342	0.0967709	-0.141841	0.228092	-0.346667	-0.0546286	-0.150982	0.178468	-0.254769	25	24	26	24	17	14	18	21	21	25	25	22	16	16	20	20
EEF2	Elongation factor 2	P13639;M0R0I6	P13639	-0.083272	-0.247552	-0.160189	0.0970721					0.525332	0.578558	0.548403	0.458445	0.260421	0.0203575	0.131717	-0.0527219	0.00247438	0.0141518	0.122382	-0.0841176	40	40	44	41	31	27	25	29	41	40	44	42	28	32	24	30
EFTUD2	116 kDa U5 small nuclear ribonucleoprotein component	Q15029-2;Q15029;Q15029-3;K7EP67;K7EJ74;K7EIT3	Q15029-2;Q15029;Q15029-3	-0.621556	-0.426363	-0.320236	-0.658417					0.682346	0.633589	0.596055	0.760466	0.562846	0.511583	0.00446133	0.373394	0.484834	0.53312	0.00637601	0.344234	13	17	23	19	18	18	14	11	16	18	27	24	21	20	16	16
EGLN1	Egl nine homolog 1	Q9GZT9-2;Q9GZT9;Q9GZT9-3	Q9GZT9-2;Q9GZT9;Q9GZT9-3	-0.297519	-0.359996	1.86132	0.566704					0.589795	0.613417	0.07879	0.271193	NaN	NaN	NaN	NaN	NaN	NaN	NaN	NaN	0	0	0	0	2	1	0	1	0	0	0	0	0	0	0	0
EHD1;EHD3	EH domain-containing protein 1;EH domain-containing protein 3	C9JC03;Q9H4M9;A0A024R571;C9J2Z4;Q9NZN3;A0A0C4DH83;C9JDQ8;C9JIJ3;C9IZH1;Q9NZN3-2	C9JC03;Q9H4M9;A0A024R571;C9J2Z4;Q9NZN3;A0A0C4DH83;C9JDQ8	0.294579	0.433949	-0.0970906	0					0.411077	0.364127	0.529383	0.5	-0.534674	-0.402025	-0.0539526	0.100066	NaN	-0.604445	NaN	NaN	1	0	4	2	0	0	0	0	0	0	2	1	0	0	0	0
EHD2	EH domain-containing protein 2	Q9NZN4;Q9NZN4-2	Q9NZN4;Q9NZN4-2	-1.378	-0.188066	-1.9025	-0.179908					0.853476	0.559846	0.925705	0.576678	-1.5436	-1.63628	-0.703559	-0.83669	0.773841	-0.798368	NaN	-0.477954	5	4	15	7	0	1	1	4	6	3	15	9	0	3	1	3
EIF1	Eukaryotic translation initiation factor 1	P41567;K7EM18;O60739	P41567;K7EM18	1.381	0.884414	1.74499	0					0.145998	0.239435	0.0925973	0.5	0.231197	0.495602	-0.0940872	-0.457802	0.28282	0.554812	-0.0985782	NaN	3	2	4	4	2	2	0	0	1	1	3	4	1	1	0	0
EIF1AY;EIF1AX	Eukaryotic translation initiation factor 1A, Y-chromosomal;Eukaryotic translation initiation factor 1A, X-chromosomal	O14602;A6NJH9;P47813;X6RAC9	O14602;A6NJH9;P47813;X6RAC9	-0.826222	-0.808922	-0.0970906	0					0.735795	0.741403	0.529383	0.5	0.415395	0.422952	0.230403	0.0567062	NaN	0.225421	NaN	NaN	1	0	2	3	0	0	0	0	0	1	3	3	0	0	0	0
EIF2A	Eukaryotic translation initiation factor 2A	Q9BY44-3;Q9BY44;F8WAE5;Q9BY44-4;C9IZE1;H7C5R5;Q9BY44-2;H7C5Q3	Q9BY44-3;Q9BY44;F8WAE5;Q9BY44-4;C9IZE1	-0.297519	-0.352811	0.767676	0.109726					0.589795	0.611214	0.279987	0.453051	0.394747	0.178088	0.429915	-0.063141	NaN	-0.0302168	-0.0383921	NaN	0	0	2	0	0	1	1	0	0	0	1	0	1	1	0	1
EIF2AK2	Interferon-induced, double-stranded RNA-activated protein kinase	P19525;P19525-2;F8WBH4;C9JZT2	P19525;P19525-2	0.0494762	-0.0736829	1.44738	-0.0960502					0.484943	0.523522	0.135891	0.54112	0.664273	0.697563	0.434388	0.246284	0.545484	0.617064	0.25082	0.476422	3	3	4	5	2	3	1	2	2	4	4	5	1	1	0	2
EIF2S1	Eukaryotic translation initiation factor 2 subunit 1	P05198;H0YJS4;G3V4T5	P05198;H0YJS4;G3V4T5	0.270982	-0.316586	-0.735681	-1.00053					0.418095	0.600051	0.711778	0.858941	0.183066	0.166615	0.0895966	0.389365	-0.170447	0.0441588	-0.101658	0.336088	2	6	7	8	9	7	5	6	2	4	9	9	10	6	4	9
EIF2S2	Eukaryotic translation initiation factor 2 subunit 2	P20042	P20042	-0.286179	0.699948	1.19703	-0.637455					0.586428	0.287595	0.181708	0.753413	0.107417	0.154236	-0.0327709	0.168075	-0.0899705	-0.0628507	-0.15014	0.268297	3	3	6	4	5	6	2	4	2	3	2	2	3	6	1	5
EIF2S3;EIF2S3L	Eukaryotic translation initiation factor 2 subunit 3;Putative eukaryotic translation initiation factor 2 subunit 3-like protein	P41091;Q2VIR3;Q2VIR3-2;F8W810;H7BZU1	P41091;Q2VIR3;Q2VIR3-2;F8W810	-0.679953	-0.472805	-0.21168	-0.216631					0.69806	0.647492	0.563845	0.592073	0.102744	0.125324	0.0239978	0.294993	-0.077419	0.124241	-0.0815465	0.251893	10	14	16	15	13	13	11	12	13	15	16	16	16	15	12	16
EIF3A	Eukaryotic translation initiation factor 3 subunit A	Q14152;Q14152-2	Q14152;Q14152-2	0.0986955	-0.0343818	1.51495	0.414271					0.469985	0.510981	0.125017	0.328036	0.00610164	0.091522	0.216871	-0.0807531	-0.307256	0.00635565	-0.0915267	0.7561	18	18	26	18	5	4	2	2	9	10	23	18	2	3	1	1
EIF3B	Eukaryotic translation initiation factor 3 subunit B	P55884;P55884-2;C9JZG1;C9JQN7	P55884;P55884-2	-0.542442	-0.256059	-0.681794	-0.177844					0.660527	0.581221	0.697656	0.575809	-0.039346	0.0651246	0.145667	-0.0137789	0.0135215	0.0187624	0.16138	-0.0473114	8	9	15	11	8	8	7	14	8	13	17	13	9	9	9	15
EIF3C;EIF3CL	Eukaryotic translation initiation factor 3 subunit C;Eukaryotic translation initiation factor 3 subunit C-like protein	Q99613;Q99613-2;B5ME19;H3BPE4;H3BPE3;H3BTY8	Q99613;Q99613-2;B5ME19	-0.429997	-0.171392	0.996563	0.804876					0.628583	0.554575	0.224624	0.193452	-0.0339228	0.021801	0.203447	-0.124131	-0.15486	0.0388826	0.233724	-0.0185332	4	5	10	5	6	5	2	6	4	5	9	5	5	7	1	8
EIF3D	Eukaryotic translation initiation factor 3 subunit D	O15371-2;O15371-3;O15371;B0QYA5;B0QYA4;B0QYA6;B0QYA8	O15371-2;O15371-3;O15371	0.0372278	-0.000195005	-0.579399	-0.396271					0.488669	0.500062	0.670004	0.664944	-0.105347	0.166092	0.136432	-0.154338	-0.240829	-0.0752351	0.307449	0.345476	1	1	4	3	3	3	2	2	1	1	3	3	2	2	1	3
EIF3E	Eukaryotic translation initiation factor 3 subunit E	P60228;E5RGA2;E5RHS5;H0YBR5;E5RIP5;E5RJ25;E5RIT4;E5RII3;H0YAW4;H0YBP5	P60228;E5RGA2;E5RHS5	-0.00816392	0.48627	-0.860016	-0.314294					0.502485	0.348512	0.743119	0.632269	-0.170842	-0.000235042	0.156345	-0.078204	-0.0145142	-0.136166	NaN	-0.180957	2	3	6	6	1	0	0	1	2	2	6	4	1	1	1	1
EIF3F	Eukaryotic translation initiation factor 3 subunit F	O00303;H0YDT6;E9PQV8;A0A0D9SEZ9	O00303	2.34376	0.22996	0.292167	0.697314	+				0.0368581	0.426959	0.412221	0.226743	0.118377	0.10901	0.197989	0.0647728	-0.122626	0.0359303	-0.137574	0.0918974	4	1	5	4	1	2	3	3	2	2	6	3	2	2	2	3
EIF3G	Eukaryotic translation initiation factor 3 subunit G	O75821;K7ER90;K7EL20;K7ENA8;K7EP16;K7EL60	O75821;K7ER90;K7EL20;K7ENA8;K7EP16	-0.527316	0.0144757	2.08958	-0.0974679					0.656291	0.495376	0.0563046	0.541724	-0.2164	-0.262066	0.118118	-0.332896	0.0804051	-0.222748	0.0355895	-0.40911	2	3	5	2	3	3	2	5	2	3	3	3	2	1	2	5
EIF3H;EIF3S3	Eukaryotic translation initiation factor 3 subunit H	O15372;B3KS98;A0A087WZK9;E5RJT0;E5RGU4;E5RFW7;E5RFH0;E5RHC7;E5RH59	O15372;B3KS98;A0A087WZK9	-0.754817	0.0911615	-0.0352032	-0.0982008					0.717676	0.470907	0.510662	0.542037	0.00569449	0.105108	0.146553	-0.091687	-0.165495	0.0311715	0.194277	-0.212079	3	2	4	4	4	6	1	3	1	1	3	4	5	6	2	6
EIF3I	Eukaryotic translation initiation factor 3 subunit I	Q13347;Q5TFK1	Q13347	0.839233	-0.359996	0.111726	-0.119956					0.260968	0.613417	0.466198	0.551303	-0.158597	-0.0539921	0.200468	-0.189067	-0.178726	-0.119925	0.160932	-0.303891	3	4	7	7	5	5	3	3	3	4	7	7	4	3	2	4
EIF3L	Eukaryotic translation initiation factor 3 subunit L	Q9Y262;B0QY89;Q9Y262-2;B0QY90;C9JHP4;C9K0Q7;H7C3A0;H0Y7E6	Q9Y262;B0QY89;Q9Y262-2;B0QY90	0.855316	-0.301853	-0.681145	0.602993					0.256995	0.595487	0.697484	0.258421	-0.153714	-0.00394128	0.110085	0.00141301	0.000907853	0.0442724	NaN	NaN	2	2	3	3	0	1	2	1	2	0	4	2	0	1	0	0
EIF4A1	Eukaryotic initiation factor 4A-I	P60842;J3KT12;P60842-2;J3QS69;J3KTB5;J3QL43;J3QR64;J3KSZ0;J3QLN6;J3KS25;J3KTN0;J3QKZ9;J3KS93;J3KT04;J3QL52;J3QQP0	P60842;J3KT12;P60842-2;J3QS69;J3KTB5;J3QL43;J3QR64;J3KSZ0	0.37126	0.110833	-0.118778	0.137208					0.388479	0.464644	0.53593	0.441369	0.481546	0.233354	0.0920462	-0.135502	0.258156	0.189752	0.0937925	-0.156773	18	16	18	18	17	18	16	17	16	17	16	18	17	18	14	17
EIF4A2	Eukaryotic initiation factor 4A-II	Q14240;Q14240-2;E7EQG2;J3KSN7;E7EMV8	Q14240;Q14240-2;E7EQG2	-0.0600805	-0.177411	-1.41738	1.07344					0.518283	0.556479	0.859079	0.12426	-0.177276	-0.464055	0.0806287	-0.587814	-0.220136	-0.857036	NaN	-0.670444	2	2	2	1	0	0	1	3	2	2	1	0	1	1	0	1
EIF4A3	Eukaryotic initiation factor 4A-III;Eukaryotic initiation factor 4A-III, N-terminally processed	P38919;I3L3H2;E9PBH4;F8WE11;C9JUF0	P38919	-0.00130276	-0.705651	-0.0951668	0.535261					0.500397	0.71396	0.528802	0.282507	0.701999	0.640873	-0.019816	0.510465	0.516556	0.636469	0.0567119	0.330338	11	10	8	7	11	10	11	9	9	12	10	9	11	13	7	8
EIF4E	Eukaryotic translation initiation factor 4E	P06730;P06730-2;P06730-3;D6RBW1;H0Y8J7;D6RFJ3;D6RHE2;H0Y8X3;A6NMX2	P06730;P06730-2;P06730-3;D6RBW1	0.294579	-1.75104	5.20938	3.67802			+	+	0.411077	0.919542	3.82e-05	3.84e-05	-0.249528	-0.163139	0.211259	0.0175139	-1.10779	-0.192117	0.171052	-0.0767258	1	1	2	3	7	7	5	7	0	0	4	3	1	0	0	2
EIF4G1	Eukaryotic translation initiation factor 4 gamma 1	Q04637-6;Q04637-5;Q04637-4;Q04637-3;Q04637;Q04637-9;Q04637-7;E7EX73;E9PGM1;E7EUU4;Q04637-8;A0A0A0MR52;C9JF13;C9J6B6;H7C044;C9K073;C9J2Z7;H7C0V6;REV__Q8NEG2-2;REV__F5H7J8;REV__Q8NEG2;REV__C9JQZ6;REV__J3KQX6	Q04637-6;Q04637-5;Q04637-4;Q04637-3;Q04637;Q04637-9;Q04637-7;E7EX73;E9PGM1;E7EUU4;Q04637-8;A0A0A0MR52	-0.443657	-0.614116	0.0214328	0.125673					0.632517	0.688535	0.493508	0.446267	0.173702	0.189345	0.125463	0.124209	0.239473	0.183327	0.134042	0.191689	4	11	28	16	2	2	4	8	6	10	28	24	6	3	7	8
EIF4G2	Eukaryotic translation initiation factor 4 gamma 2	P78344-2;H0Y3P2;P78344;D3DQV9;H0YCH5;H0YEC5;H0YD77;E9PKF8;H0YE22;H0YCF8;H0YD99;H0YE44;H0YEN8;H0YDC0	P78344-2;H0Y3P2;P78344;D3DQV9;H0YCH5	1.06484	0.441211	-0.0970906	0					0.20825	0.361946	0.529383	0.5	-0.0536773	0.0368333	-0.0801978	-0.111202	-0.130658	0.0185835	NaN	NaN	4	4	7	5	0	0	0	0	1	3	8	5	0	0	0	0
EIF4H	Eukaryotic translation initiation factor 4H	Q15056-2;Q15056	Q15056-2;Q15056	-0.0624036	0.549984	0.90252	0.275267					0.518989	0.329841	0.246589	0.383648	0.135624	0.0648372	-0.11866	0.238041	0.538749	0.201551	-0.0661424	0.345292	3	5	7	6	2	2	2	2	2	4	5	5	2	1	1	2
EIF5	Eukaryotic translation initiation factor 5	P55010;H0YLZ1;H0YN40;H0YK11;H0YMJ8;H0YM54;H0YK29	P55010;H0YLZ1;H0YN40	2.65191	0.703881	1.94334	0.566704	+				0.021511	0.286522	0.0700346	0.271193	0.410389	0.27076	-0.0978618	0.253474	0.545595	0.124671	-0.458937	0.244363	4	3	5	3	2	3	0	1	1	0	2	1	0	0	0	0
EIF5A;EIF5AL1	Eukaryotic translation initiation factor 5A-1;Eukaryotic translation initiation factor 5A-1-like	P63241;I3L397;P63241-2;I3L504;Q6IS14;F8WCJ1;C9J7B5;C9J4W5;Q9GZV4	P63241;I3L397;P63241-2;I3L504;Q6IS14	0.0745636	0.305513	0.0874909	0.371334					0.477315	0.403378	0.473518	0.344878	0.278435	0.137762	-0.0326749	0.159367	0.379738	0.249016	-0.055019	0.17289	9	13	11	11	8	7	4	8	8	8	9	11	6	6	4	7
EIF5B	Eukaryotic translation initiation factor 5B	O60841;A0A087WUT6	O60841;A0A087WUT6	0.237996	-0.227437	0.723606	-0.768655					0.427949	0.572248	0.291359	0.795685	0.315584	0.261658	0.223065	0.177822	0.36798	0.174965	0.445437	0.0992065	1	3	11	5	3	4	3	5	1	5	7	8	3	5	5	6
EIF6	Eukaryotic translation initiation factor 6	P56537;P56537-2;B7ZBH1;F8WD20;A0A0B4J1Y7;F8WDS6	P56537;P56537-2	0.229481	0.0119847	0.0251342	-0.152433					0.4305	0.496172	0.492387	0.565082	0.653925	0.332202	0.165544	-0.257588	1.06614	0.361559	0.167384	-0.1136	1	3	3	3	3	4	2	1	1	3	2	3	3	2	1	2
ELAVL1	ELAV-like protein 1	Q15717;Q15717-2;M0QZR9;M0R055;P26378-4;P26378-2;P26378-5;B1APY9;P26378;P26378-3;B1APY8	Q15717;Q15717-2;M0QZR9	0.0191512	-0.117397	-0.113974	0.231754					0.49417	0.537444	0.53448	0.401627	0.639826	0.515791	0.00301753	0.427323	0.64439	0.552579	0.0397193	0.254482	9	10	8	10	9	10	10	11	8	9	10	9	11	10	9	8
EMD	Emerin	P50402;Q5HY57	P50402;Q5HY57	-1.51655	-0.975867	2.45937	0.884054			+		0.8764	0.7827	0.0309266	0.170964	0.274313	-0.237578	-0.260014	-0.373011	NaN	0.685671	-0.141171	0.0886664	0	0	1	2	5	3	4	5	0	1	2	2	3	3	2	2
EMG1	Ribosomal RNA small subunit methyltransferase NEP1	Q92979;A0A087WVM7;V9GYP5;A0A087WWQ2	Q92979;A0A087WVM7;V9GYP5;A0A087WWQ2	-0.207551	0.248961	-0.269132	0.566704					0.562917	0.421001	0.580958	0.271193	1.17957	0.94172	0.321078	0.336013	1.50556	NaN	0.290083	NaN	1	2	1	1	1	2	1	1	1	2	1	0	3	0	0	0
EML4	Echinoderm microtubule-associated protein-like 4	Q9HC35;Q9HC35-2;B5MBZ0	Q9HC35;Q9HC35-2;B5MBZ0	0.294579	-0.359996	-0.345131	-0.0681843					0.411077	0.613417	0.603359	0.529216	-0.228024	-0.16767	-0.494754	0.182255	NaN	NaN	NaN	NaN	1	0	0	1	1	1	1	0	0	0	1	0	0	1	1	0
ENO1	Alpha-enolase;Enolase	P06733;P06733-2;K7EM90;P13929-3;P13929-2;P13929;E5RI09;E5RG95;K7EPM1;K7EKN2;E5RGZ4	P06733;P06733-2;K7EM90	0.204751	-0.0819745	0.309625	0.361834					0.437925	0.526165	0.407069	0.348648	0.874525	0.645711	-0.106426	0.936389	0.846863	0.71475	-0.065744	0.900937	14	16	18	18	13	14	13	16	11	17	19	18	13	12	10	17
EPRS	Bifunctional glutamate/proline--tRNA ligase;Glutamate--tRNA ligase;Proline--tRNA ligase	P07814;V9GYZ6;V9GZ76	P07814;V9GYZ6	-0.821523	-0.639331	-0.516639	-0.266856					0.734622	0.695636	0.652572	0.612895	-0.133266	-0.0580019	-0.0960544	0.0839195	-0.221774	-0.129844	-0.0868271	0.108328	9	11	25	22	10	11	11	12	9	17	29	24	10	11	9	18
EPS8L2	Epidermal growth factor receptor kinase substrate 8-like protein 2	Q9H6S3;Q9H6S3-3;E9PN68;E9PLN2;E9PNT0;E9PLH1;H0YD62;H0YF37;Q9H6S3-2	Q9H6S3;Q9H6S3-3	0.173778	0.603247	-0.0970906	0					0.447256	0.314548	0.529383	0.5	-0.706366	-0.171531	-0.267864	-0.307774	-0.614943	-0.0395198	NaN	NaN	1	1	1	1	0	0	0	0	0	1	1	1	0	0	0	0
ERH	Enhancer of rudimentary homolog	P84090;G3V279	P84090;G3V279	1.1187	1.08641	0.235777	0.716866					0.196661	0.192192	0.428961	0.220461	0.422516	0.441873	-0.0599982	0.162842	0.0756726	0.479283	-0.0372189	0.0769449	5	3	4	4	3	3	2	2	2	2	3	3	3	2	2	1
ERLIN1	Erlin-1	O75477;B0QZ43	O75477;B0QZ43	-0.248431	-0.15882	-0.0970906	0.566704					0.575174	0.550594	0.529383	0.271193	NaN	-0.816092	NaN	0.652701	NaN	-0.626713	NaN	NaN	0	1	1	0	0	0	0	1	0	1	1	1	0	0	0	1
ERLIN2	Erlin-2	E5RHW4;O94905;E5RJ09;O94905-2;O94905-3	E5RHW4;O94905;E5RJ09	-0.635581	-0.449295	-0.47233	-0.492815					0.686151	0.640477	0.640064	0.701867	-0.700055	-0.635581	0.0146805	-0.401865	-0.546498	-0.742991	-0.253234	-0.182402	4	6	9	6	2	1	3	5	6	5	10	7	1	2	4	6
ERP29	Endoplasmic reticulum resident protein 29	P30040;F8VY02;P30040-2	P30040;F8VY02	-0.297519	-0.0822897	-0.0970906	0					0.589795	0.526266	0.529383	0.5	-0.587454	-0.692458	NaN	-0.373693	NaN	-0.731486	NaN	NaN	0	0	3	3	0	0	0	0	0	0	3	3	0	0	0	0
ESD	S-formylglutathione hydrolase	P10768;X6RA14;H7BZT7;U3KQT1	P10768;X6RA14;H7BZT7;U3KQT1	3.58126	2.15946	1.94804	1.92844	+	+		+	0.00314159	0.041904	0.0695565	0.0190821	0.0261032	0.044172	-0.0947975	0.00473828	0.0242695	0.0903842	-0.0536467	0.0195575	16	16	15	15	11	11	9	10	6	9	14	8	8	9	6	8
ESYT1	Extended synaptotagmin-1	Q9BSJ8;Q9BSJ8-2;F8VZB1	Q9BSJ8;Q9BSJ8-2	-0.649839	-0.407835	-0.106028	-0.396671					0.69	0.627992	0.532082	0.6651	-0.433569	-0.373495	-0.520817	0.263206	-0.791202	-0.446008	-0.503042	0.222878	5	9	14	11	8	8	8	12	8	13	18	14	8	10	8	12
ETF1	Eukaryotic peptide chain release factor subunit 1	P62495;P62495-2;B7Z7P8;I3L492;D6RCB3;D6RJE8	P62495;P62495-2;B7Z7P8	0.966648	0.157678	-0.465154	0.222932					0.230383	0.449768	0.638024	0.4053	0.0755197	0.141573	0.309557	0.034938	0.170997	0.0555123	0.287544	-0.0772393	3	5	6	5	3	5	2	2	3	3	5	5	5	4	1	3
ETFA	Electron transfer flavoprotein subunit alpha, mitochondrial	P13804;P13804-2;H0YLU7;H0YK49;H0YNX6;H0YKF0;H0YL12;J3KN60;H0YL83	P13804;P13804-2;H0YLU7;H0YK49;H0YNX6;H0YKF0;H0YL12	-1.51655	-0.538239	-0.0970906	0					0.8764	0.666747	0.529383	0.5	0.0870438	0.034309	NaN	-0.222404	NaN	-0.209065	NaN	NaN	0	0	2	1	0	1	1	1	1	2	3	1	0	1	0	0
ETFB	Electron transfer flavoprotein subunit beta	P38117;P38117-2;M0QY67	P38117;P38117-2	-0.297519	0.960399	-0.0970906	0					0.589795	0.220959	0.529383	0.5	0.451539	-0.474914	NaN	NaN	NaN	-0.47053	NaN	NaN	0	0	3	2	0	0	0	0	0	0	2	0	0	0	0	0
ETHE1	Persulfide dioxygenase ETHE1, mitochondrial	O95571;M0QXB5;M0QY80;M0QX80	O95571;M0QXB5;M0QY80	-0.297519	0.12999	-0.0970906	0					0.589795	0.458553	0.529383	0.5	-0.766985	0.61288	NaN	NaN	NaN	0.700732	NaN	NaN	0	0	2	0	0	0	0	0	0	0	2	0	0	0	0	0
EWSR1	RNA-binding protein EWS	Q01844-6;B0QYK0;Q01844-3;Q01844;Q01844-5;H7BY36;Q01844-2;A0A0D9SFL3;C9JGE3;F8WC90;Q01844-4	Q01844-6;B0QYK0;Q01844-3;Q01844;Q01844-5;H7BY36;Q01844-2;A0A0D9SFL3;C9JGE3	1.08209	-0.102551	0.953402	4.16575				+	0.204496	0.53272	0.234564	3.76e-06	0.47395	0.181575	0.0306595	0.00267661	0.264524	0.38631	0.0815525	-0.222501	2	3	2	2	2	2	3	3	2	1	2	2	1	2	0	1
EXOSC10	Exosome component 10	Q01780-2;Q01780;K7EJ37	Q01780-2;Q01780	-0.297519	1.39456	2.67469	0			+		0.589795	0.132088	0.021136	0.5	0.627413	1.10425	0.244741	NaN	NaN	1.467	-0.0605673	NaN	0	0	3	0	2	2	0	0	0	0	0	1	0	1	0	1
EXOSC2	Exosome complex component RRP4	Q13868-3;Q13868;A3KFL2;A3KFL5;Q13868-2;A3KFL1	Q13868-3;Q13868;A3KFL2;A3KFL5;Q13868-2;A3KFL1	0.280273	1.00484	-0.936303	0					0.415329	0.210543	0.761431	0.5	1.33628	1.10342	0.188028	0.887072	-0.359317	1.03956	0.406428	NaN	0	2	1	3	2	1	1	0	0	0	1	2	3	1	0	0
EXOSC3	Exosome complex component RRP40	Q9NQT5;Q9NQT5-2	Q9NQT5;Q9NQT5-2	1.48277	1.02413	0.949654	-0.926562					0.128942	0.206111	0.235439	0.840389	1.26956	1.27376	0.0484774	0.818369	1.35315	1.74453	-0.276824	NaN	1	2	1	2	1	1	0	1	0	1	0	1	1	1	1	1
EXOSC4	Exosome complex component RRP41	Q9NPD3;E9PI41;E9PPI9	Q9NPD3;E9PI41	-1.63449	0.507859	0.47346	-0.54944					0.893833	0.342142	0.359615	0.722623	1.34487	0.918572	0.281359	1.2914	NaN	1.39633	0.325735	1.33381	0	1	4	3	5	4	2	0	1	2	3	4	3	2	1	1
EXOSC5	Exosome complex component RRP46	Q9NQT4;M0R050;M0R102	Q9NQT4;M0R050	0.280273	1.33147	0.902909	0.566704					0.415329	0.143198	0.246495	0.271193	1.34254	0.920677	0.068096	0.832724	NaN	1.3878	0.437326	NaN	0	1	3	4	1	1	0	1	0	0	0	1	1	1	0	0
EXOSC7	Exosome complex component RRP42	Q15024	Q15024	-0.826222	-0.352811	0.588911	0.566704					0.735795	0.611214	0.327384	0.271193	0.904187	0.239666	-0.0604421	0.431897	NaN	NaN	0.334416	NaN	0	0	1	1	3	2	0	1	0	1	1	0	2	1	0	0
EXOSC8	Exosome complex component RRP43	Q96B26	Q96B26	1.18124	1.24896	0.508764	-1.37427					0.183707	0.158655	0.34964	0.930209	NaN	1.18442	0.239818	0.67033	0.976059	1.38123	0.217097	0.548061	2	4	2	3	4	4	1	1	0	4	1	1	3	3	2	1
EXOSC9	Exosome complex component RRP45	Q06265-3;Q06265-4;D6RIY6;Q06265;Q06265-2;H0Y9L5;D6R905;D6RA17	Q06265-3;Q06265-4;D6RIY6;Q06265;Q06265-2	1.29998	1.00484	-0.118417	1.35422					0.160616	0.210543	0.535821	0.0727244	1.22357	1.14111	0.216195	0.625584	1.50388	0.798532	0.0832508	1.80531	2	1	1	2	3	3	3	1	1	1	1	1	3	1	0	0
EZR	Ezrin	P15311;E7EQR4	P15311;E7EQR4	-0.0567104	-0.422883	-0.0554653	-0.265335					0.517258	0.63254	0.516796	0.612269	0.188834	0.292917	-0.821947	0.887849	0.199359	0.28499	-0.876923	0.987004	5	10	13	12	12	10	8	12	9	12	14	12	10	9	10	12
FABP5	Fatty acid-binding protein, epidermal	Q01469;I6L8B7;A8MUU1	Q01469;I6L8B7	0.226511	-0.195212	-0.0905874	-0.0606154					0.43139	0.562101	0.527418	0.525977	-0.109072	-0.0139009	1.25354	-0.227148	0.189849	0.034481	0.55647	0.0438463	4	6	6	5	4	5	3	2	4	4	5	4	4	4	3	3
FAM120A	Constitutive coactivator of PPAR-gamma-like protein 1	Q9NZB2;Q9NZB2-6;Q9NZB2-4;A0A0C4DG79;Q9NZB2-5;A0A0C4DH52;Q9NZB2-2	Q9NZB2;Q9NZB2-6;Q9NZB2-4;A0A0C4DG79;Q9NZB2-5	-1.35884	-0.566051	1.65528	-0.973606					0.850095	0.674804	0.10441	0.852365	-0.262248	-0.342812	-0.253058	-0.029077	0.0911245	-0.487615	-0.121347	-0.0570546	0	2	6	5	1	4	1	2	2	3	7	4	1	1	1	5
FAM120B	Constitutive coactivator of peroxisome proliferator-activated receptor gamma	Q96EK7;A0A0D9SEJ5;F5GY05;Q96EK7-2;Q96EK7-3	Q96EK7;A0A0D9SEJ5;F5GY05;Q96EK7-2	-1.93663	-2.88964	-4.48954	-4.54457					0.930258	0.989656	0.999674	0.999999	NaN	NaN	NaN	NaN	NaN	3.41004	NaN	NaN	0	0	1	0	0	0	0	0	2	1	6	6	5	6	4	7
FAM50A;FAM50B	Protein FAM50A;Protein FAM50B	Q14320;B0S8I6;Q9Y247	Q14320;B0S8I6;Q9Y247	1.28027	1.82108	0.514948	0					0.164311	0.0724097	0.347903	0.5	0.814773	1.15738	0.0774323	1.02565	1.19384	1.29498	NaN	NaN	1	3	3	2	0	1	0	0	0	0	0	1	0	0	0	0
FAM98A	Protein FAM98A	E9PH82;Q8NCA5-2;Q8NCA5;C9J3G8	E9PH82;Q8NCA5-2;Q8NCA5	-1.76768	0.0814181	0.930894	0.981773					0.9113	0.474012	0.239843	0.145618	-0.423046	-0.320611	0.182231	-0.381323	-1.04675	-0.305041	0.19309	-0.141044	1	1	3	1	1	1	1	2	1	2	2	1	1	1	0	2
FAP	Seprase	A0A0D9SEN1;Q12884;B4DLR2;Q12884-2;C9J131;H7C4D9;F8WF29	A0A0D9SEN1;Q12884;B4DLR2	-1.80211	-1.86395	-0.0970906	-0.0175451					0.915446	0.932203	0.529383	0.507524	-2.68814	-1.66416	NaN	-1.94846	-1.94616	-1.86528	NaN	-1.51876	3	2	6	1	0	0	0	3	6	4	11	4	0	0	3	2
FARSA	Phenylalanine--tRNA ligase alpha subunit	Q9Y285;Q9Y285-2;K7ER00;K7ER16;K7EK06;K7EPH2;K7ERS0	Q9Y285;Q9Y285-2;K7ER00;K7ER16;K7EK06;K7EPH2	-0.248431	-0.667252	-0.0970906	0					0.575174	0.703414	0.529383	0.5	0.337644	0.321446	NaN	NaN	NaN	0.180314	NaN	NaN	0	1	3	4	0	0	0	0	0	1	3	3	0	0	0	0
FARSB	Phenylalanine--tRNA ligase beta subunit	Q9NSD9;Q9NSD9-2	Q9NSD9;Q9NSD9-2	-1.51655	0.00860993	-0.0970906	0					0.8764	0.49725	0.529383	0.5	0.124508	0.195631	0.246039	0.10945	NaN	0.122133	NaN	NaN	0	1	7	6	1	0	0	0	1	2	6	6	0	0	0	0
FASN	Fatty acid synthase;[Acyl-carrier-protein] S-acetyltransferase;[Acyl-carrier-protein] S-malonyltransferase;3-oxoacyl-[acyl-carrier-protein] synthase;3-oxoacyl-[acyl-carrier-protein] reductase;3-hydroxyacyl-[acyl-carrier-protein] dehydratase;Enoyl-[acyl-carrier-protein] reductase;Oleoyl-[acyl-carrier-protein] hydrolase	P49327;J3KTF0	P49327	0.231467	-0.0818224	0.111419	0.232145					0.429905	0.526117	0.466291	0.401465	-0.310284	0.00562582	0.0795176	-0.107802	-0.503296	0.00217501	0.101771	-0.175542	72	74	74	78	73	75	61	69	57	66	78	74	59	66	53	60
FAU	40S ribosomal protein S30	P62861;E9PR30;E9PM49	P62861;E9PR30	-0.871404	-0.0110867	0.434925	-0.305311					0.746946	0.503541	0.370613	0.628624	-0.138331	-0.141069	0.360725	-0.583698	-0.0228135	-0.0604935	0.509714	-0.533913	1	2	3	3	3	3	2	3	2	2	3	3	1	4	2	2
FBL	rRNA 2-O-methyltransferase fibrillarin	P22087;M0QXL5;M0R299;M0R2Q4;M0R0P1;M0R2U2;M0R1H0;M0R2B0;A0A0D9SFM2;M0QXC9	P22087;M0QXL5;M0R299;M0R2Q4;M0R0P1;M0R2U2;M0R1H0;M0R2B0	0.305731	-0.364368	-0.454438	-0.211527					0.407771	0.614756	0.63497	0.589941	0.529404	0.470631	0.158825	-0.26447	0.530578	0.427363	0.144016	-0.166558	7	8	6	6	10	12	6	6	6	8	6	9	11	11	5	7
FEN1	Flap endonuclease 1	P39748;P39748-2;I3L3E9;F5H1Y3	P39748;P39748-2;I3L3E9	0.259977	0.709722	0.301055	1.58496				+	0.421377	0.284933	0.409596	0.0442052	2.2095	2.33012	0.056338	2.20247	2.31801	2.21128	0.152505	2.17562	4	4	6	5	4	3	1	2	3	3	5	3	2	3	1	1
FERMT2	Fermitin family homolog 2	Q96AC1;Q96AC1-3;H0YJ34;Q96AC1-2;G3V281;H0YJB6;G3V5R2;G3V3J0;G3V379;G3V1L6;Q9BQL6-4;Q9BQL6-2;Q9BQL6	Q96AC1;Q96AC1-3;H0YJ34;Q96AC1-2	-0.641701	-1.35414	-0.50757	-0.1918					0.687806	0.860865	0.650025	0.581677	-0.937148	-0.829853	-0.534027	0.40778	-0.614172	-0.840431	-1.10126	0.151536	2	2	3	2	3	5	8	5	1	2	7	3	4	6	7	7
FGF2	Fibroblast growth factor 2	P09038-2;P09038-3;P09038-1;P09038;A0A087WUF6	P09038-2;P09038-3;P09038-1;P09038;A0A087WUF6	-0.826222	0.200566	1.6985	0.0734376					0.735795	0.43621	0.0985884	0.468538	0.231063	0.797878	1.24986	NaN	NaN	-0.0195862	1.17234	NaN	1	0	1	0	2	2	0	1	1	1	0	0	1	1	0	1
FGGY	FGGY carbohydrate kinase domain-containing protein	F2Z2V1;Q96C11;Q96C11-3;C9J015;Q96C11-5;J3QKV9;Q96C11-6;Q96C11-4	F2Z2V1;Q96C11;Q96C11-3;C9J015;Q96C11-5	1.71317	-0.359996	-0.0970906	0					0.0955708	0.613417	0.529383	0.5	NaN	NaN	NaN	NaN	-1.72447	NaN	NaN	NaN	2	1	0	0	0	0	0	0	0	0	0	0	0	0	0	0
FHL1	Four and a half LIM domains protein 1	Q13642-1;Q13642-5;Q13642-4;Q5JXI8;Q13642;A0A0D9SFZ9;Q13642-3;Q5JXH8;Q5JXH7;Q5JXI3;Q5JXI2;A0A0D9SFI6;A0A0D9SFB0;Q5JXH9;A0A0D9SGB2;Q5JXI0;A0A0D9SG53;A0A0D9SGD1;A0A0D9SEY7	Q13642-1;Q13642-5;Q13642-4;Q5JXI8;Q13642;A0A0D9SFZ9;Q13642-3;Q5JXH8;Q5JXH7;Q5JXI3;Q5JXI2;A0A0D9SFI6;A0A0D9SFB0;Q5JXH9	3.5129	1.12341	3.50507	3.98352	+		+	+	0.00367601	0.1842	0.00389168	9.25e-06	-0.567831	-0.559002	-0.012607	-0.625275	-0.8869	-0.384132	-0.366279	-0.461242	4	4	6	3	4	4	6	5	1	0	3	1	1	0	1	0
FHL2	Four and a half LIM domains protein 2	Q14192;J3KNW4;A0A0A0MSG2;C9J3S8;F8WDA8;U3KQT4;Q14192-2	Q14192;J3KNW4;A0A0A0MSG2	1.32252	0.0357332	0.841258	0.579008					0.156457	0.488588	0.261493	0.266827	-1.22029	-1.0602	-0.958186	-0.6467	-1.10726	-0.975933	-0.867884	-0.699991	9	10	12	8	11	9	9	11	6	3	6	7	7	8	8	8
FHOD1	FH1/FH2 domain-containing protein 1	Q9Y613;J3KTH7	Q9Y613	1.70248	2.63309	-0.0970906	0		+			0.096963	0.0175058	0.529383	0.5	NaN	NaN	NaN	NaN	-0.792269	-0.20044	NaN	NaN	2	3	4	6	0	0	0	0	0	0	0	1	0	0	0	0
FIS1	Mitochondrial fission 1 protein	Q9Y3D6	Q9Y3D6	2.28027	-0.0126235	-0.0970906	0	+				0.0409358	0.504032	0.529383	0.5	-0.891292	-0.913165	NaN	NaN	-1.18677	-1.21758	NaN	NaN	2	2	2	1	0	0	0	0	0	0	1	1	0	0	0	0
FKBP10	Peptidyl-prolyl cis-trans isomerase FKBP10	Q96AY3;K7ESG6;K7ELI6;Q96AY3-2;H0Y827;C9JPC3;K7EM43	Q96AY3	-0.606899	-0.722429	-0.125592	-1.49327					0.678348	0.718511	0.537985	0.945783	-2.15353	-2.32334	NaN	-1.89195	-1.72892	-2.22745	NaN	NaN	1	1	3	1	1	0	0	0	1	3	2	2	1	0	1	2
FKBP1A;FKBP12-Exin;FKBP12-Exip2	Peptidyl-prolyl cis-trans isomerase FKBP1A;Peptidyl-prolyl cis-trans isomerase	P62942;Q1JUQ3;Q1JUQ5;A0A087WTS4;Q5W0X3;A0A087WV48;A0A087WZM5	P62942;Q1JUQ3;Q1JUQ5;A0A087WTS4;Q5W0X3;A0A087WV48;A0A087WZM5	-1.29752	-0.422842	-0.0813282	0.129406					0.838926	0.632528	0.524619	0.444681	-0.207676	-0.2879	0.321823	-0.422594	NaN	-0.0115095	NaN	NaN	0	0	2	2	1	1	1	1	1	1	2	2	2	1	1	0
FKBP3	Peptidyl-prolyl cis-trans isomerase FKBP3	Q00688;G3V5F2	Q00688	-0.167704	-0.708538	1.27321	0.391134					0.550911	0.714745	0.166841	0.337071	0.169765	0.288226	0.194695	0.0124905	0.207437	0.229545	NaN	0	3	3	5	7	1	1	2	3	1	3	4	7	0	1	1	2
FKBP4	Peptidyl-prolyl cis-trans isomerase FKBP4;Peptidyl-prolyl cis-trans isomerase FKBP4, N-terminally processed	Q02790;F5H1U3;H0YFG2;F5H120	Q02790	-0.936628	1.50446	1.31886	-0.711105					0.762597	0.114185	0.158322	0.777698	0.512051	0.599462	0.329677	0.764787	NaN	0.78126	0.244049	0.542244	0	0	6	3	2	2	0	2	2	0	4	2	0	1	1	3
FLII	Protein flightless-1 homolog	Q13045-3;Q13045;J3QQQ2;J3QQU5	Q13045-3;Q13045	0.294579	-0.580795	0.417094	-2.16578					0.411077	0.679042	0.375739	0.99005	0.0315087	-0.0838002	-0.340413	0.31738	-0.130774	-0.105641	-0.249008	0.721214	4	3	5	5	3	3	1	3	3	1	9	7	1	2	2	3
FLNA	Filamin-A	P21333-2;P21333;Q5HY54;Q60FE5;A0A087WWY3;F8WE98;H0Y5C6;H0Y5F3;H7C2E7	P21333-2;P21333;Q5HY54;Q60FE5;A0A087WWY3	0.20261	0.0410001	0.405567	0.293795					0.438569	0.486906	0.379065	0.376065	-0.806015	-0.663962	-0.768884	-0.241271	-1.02406	-0.688615	-0.751403	-0.246799	112	106	117	111	98	98	103	106	91	101	117	106	87	85	91	98
FLNB	Filamin-B	O75369-2;O75369-9;O75369;O75369-8;O75369-6;O75369-3;E7EN95;O75369-7;O75369-5;O75369-4;H7C5L4;A0A0A0MT44;A0A0C4DGA1	O75369-2;O75369-9;O75369;O75369-8;O75369-6;O75369-3;E7EN95;O75369-7;O75369-5;O75369-4	1.02981	0.145667	1.10332	0.696915					0.215997	0.453576	0.201093	0.226872	0.598688	0.686873	-0.530175	1.17102	0.484225	0.68332	-0.542294	1.24446	48	51	61	58	62	58	46	54	21	34	55	52	36	38	28	49
FLNC	Filamin-C	Q14315;Q14315-2	Q14315;Q14315-2	-0.119506	-0.159867	0.280435	0.236312					0.536328	0.550926	0.415692	0.399734	-0.694729	-0.930705	-0.956279	-0.312222	-0.952743	-0.930382	-0.934351	-0.293667	103	94	118	109	86	84	79	89	88	97	114	102	63	66	73	92
FLOT1	Flotillin-1	O75955;O75955-2;A2AB12;A2AB10;A2AB09;A2AB13;A2AB11;A2ABJ5	O75955;O75955-2;A2AB12;A2AB10	-2.24843	0.296601	1.65047	-0.591909					0.956885	0.406143	0.105072	0.737711	-0.785636	-0.5068	-0.9328	-0.189892	NaN	-0.645879	-0.127614	NaN	1	1	3	4	3	0	2	0	2	3	4	2	1	0	0	2
FLOT2	Flotillin-2	Q14254;J3QLD9;E7EMK3;K7EKW9	Q14254;J3QLD9;E7EMK3;K7EKW9	0.873789	0.0866263	-0.863283	-1.67118					0.252472	0.472352	0.743918	0.963794	-1.12307	-0.535599	-0.68051	-0.0618862	-0.684808	-0.385445	NaN	NaN	1	2	3	3	1	0	0	0	3	2	2	1	2	1	1	1
FN1	Fibronectin;Anastellin;Ugl-Y1;Ugl-Y2;Ugl-Y3	P02751;P02751-3;P02751-8;P02751-17;P02751-14;P02751-6;P02751-5;P02751-9;P02751-10;P02751-4;P02751-12;H0Y7Z1;P02751-16;P02751-2;H0Y4K8	P02751;P02751-3;P02751-8;P02751-17;P02751-14;P02751-6;P02751-5;P02751-9;P02751-10;P02751-4;P02751-12	-1.42043	-1.38604	-0.716961	-0.822521					0.860782	0.866448	0.706908	0.81171	-2.00391	-2.48344	-1.25873	-0.745749	-1.65041	-2.27586	-1.46922	-0.97044	23	24	38	35	32	37	33	39	38	36	54	55	37	43	43	46
FNDC3B	Fibronectin type III domain-containing protein 3B	Q53EP0;Q53EP0-2	Q53EP0;Q53EP0-2	-0.344531	-0.359996	1.11445	1					0.603682	0.613417	0.198727	0.141186	-0.690191	-0.990373	-0.26082	-0.353707	NaN	NaN	-0.065048	NaN	1	0	0	0	3	3	1	1	1	0	0	0	1	1	0	0
FOXJ3	Forkhead box protein J3	Q9UPW0-2;Q9UPW0;C9JVP0;H7C1Y6;H0YJG3;S4R3U5;C9JXI1;H0YJ94;H0YJ22;F6VXT0;H0YJ54;G3V3A7;C9JTA7;Q96NZ1-3;A0A087X1X6;P32314-2;Q92949;P32314;O00409-2;P55316;O00409;Q96NZ1;Q9P0K8-2;Q9P0K8;O15353	Q9UPW0-2;Q9UPW0;C9JVP0	3.00714	4.4212	3.35487	0	+	+	+		0.0108794	0.000200138	0.00542835	0.5	NaN	NaN	NaN	NaN	0.958997	1.05899	-0.0519055	NaN	1	5	5	4	3	3	0	0	0	0	0	0	0	0	0	0
FSCN1	Fascin	Q16658;C9JFC0;A0A0A0MSB2;C9JPH9	Q16658	0.0152634	-0.113387	0.237244	-0.101072					0.495354	0.536168	0.428524	0.543261	-1.06428	-1.02018	-0.424015	-0.701372	-1.25822	-1.02649	-0.418311	-0.718989	20	19	23	15	17	19	17	19	20	19	19	17	18	17	15	19
FTH1	Ferritin heavy chain;Ferritin	P02794;G3V192;G3V1D1;E9PRK8;E9PKY7;E9PQR3;E9PPQ4;E9PKM5;E9PK45	P02794;G3V192;G3V1D1	-2.93238	-3.01262	-5.52355	-3.81416					0.987373	0.99207	0.999986	0.999979	NaN	-0.197941	NaN	NaN	-1.27332	-1.55886	NaN	NaN	1	2	1	3	0	0	0	2	7	7	4	5	7	8	6	6
FTL	Ferritin light chain	P02792;A0A087X1B9	P02792;A0A087X1B9	-2.3385	-1.28794	-3.79732	-3.20206					0.962817	0.848779	0.998032	0.999712	-0.987204	-1.36282	0.503616	-0.514945	-2.25882	-1.99993	NaN	NaN	1	4	5	2	0	0	0	1	6	8	6	4	4	5	3	4
FUBP1	Far upstream element-binding protein 1	Q96AE4;Q96AE4-2;E9PEB5;C9JSZ1	Q96AE4;Q96AE4-2;E9PEB5	1.55992	0.0230074	1.38292	1.49314					0.116969	0.492651	0.146854	0.0542318	0.478376	0.470156	-0.109761	0.268951	0.531218	0.652582	-0.0420292	0.233902	14	15	10	12	19	19	16	16	9	10	11	12	12	10	9	10
FUBP3	Far upstream element-binding protein 3	Q96I24;Q96I24-2	Q96I24;Q96I24-2	3.02011	-0.624564	3.0545	1.8339	+		+	+	0.0105987	0.691486	0.0101917	0.0243363	0.0958228	-0.0233229	0.0676201	-0.0235458	0.0801358	NaN	0.225052	-0.0846515	2	5	1	1	4	3	3	3	0	0	1	0	2	2	0	1
FUS	RNA-binding protein FUS	P35637-2;P35637;H3BPE7	P35637-2;P35637;H3BPE7	0.460288	-0.131482	-0.00728107	0.0955277					0.362713	0.54192	0.502205	0.459103	0.706251	0.660286	-0.0382729	0.202992	0.688079	0.788837	-0.0310306	0.0374187	4	5	4	4	6	6	4	4	5	4	4	5	5	5	4	4
FXR1	Fragile X mental retardation syndrome-related protein 1	P51114-2;P51114;B4DXZ6;E9PFF5;E7EU85;P51114-3;C9JAJ4;C9JZE0;C9JY20;C9J5B4;C9IZ22;C9JYQ6	P51114-2;P51114;B4DXZ6;E9PFF5;E7EU85;P51114-3	0.341848	-0.775034	0.486511	0.598252					0.397107	0.73255	0.355916	0.260072	0.215983	0.139334	-0.056636	0.23746	-0.163679	-0.0362995	0.267185	-0.000998521	4	4	4	3	3	3	1	3	5	3	3	3	2	2	2	3
G3BP1	Ras GTPase-activating protein-binding protein 1	Q13283;E5RIZ6;E5RH00;E5RI46;E5RIF8;E5RH42;Q13283-2;E5RJU8	Q13283	-0.207168	0.0729323	-0.0691062	-0.0681843					0.562802	0.476717	0.520923	0.529216	0.182946	0.162018	-0.0103891	-0.507841	0.144462	0.107743	0.100904	NaN	2	2	6	6	1	2	1	0	3	6	6	4	0	2	1	0
G3BP2	Ras GTPase-activating protein-binding protein 2	Q9UN86-2;Q9UN86;D6RBM9;D6REX8;D6RBR0;D6RE13;D6RBW8;D6RGJ4;D6RAC7;D6RB17;D6R9X5;D6R9A4	Q9UN86-2;Q9UN86;D6RBM9;D6REX8;D6RBR0;D6RE13;D6RBW8;D6RGJ4;D6RAC7;D6RB17	0.702481	0.348461	1.46028	-0.493266					0.295973	0.390122	0.133768	0.702036	-0.18723	-0.14374	0.0554844	-0.713724	-0.534015	-0.308277	NaN	NaN	1	1	4	3	1	1	0	1	1	1	3	3	0	0	1	1
G6PD	Glucose-6-phosphate 1-dehydrogenase	P11413;P11413-2;P11413-3;E7EUI8;E7EM57;E9PD92	P11413;P11413-2;P11413-3;E7EUI8;E7EM57;E9PD92	-0.545937	-0.460216	0.650473	-0.254288					0.661503	0.643742	0.310692	0.607712	-1.26114	-1.17946	0.230081	-0.612256	-1.4058	-1.08913	NaN	-0.643757	4	5	7	6	2	0	4	11	6	7	13	5	1	1	5	11
GALNT2	Polypeptide N-acetylgalactosaminyltransferase 2;Polypeptide N-acetylgalactosaminyltransferase 2 soluble form	Q10471;Q10471-2	Q10471	1.01148	0.640004	1.65047	2.54821				+	0.220119	0.304175	0.105072	0.00307812	-1.67827	-0.660081	NaN	-0.636358	NaN	NaN	-0.161622	-0.828023	0	1	2	2	2	0	1	2	0	0	1	1	0	0	0	0
GANAB	Neutral alpha-glucosidase AB	Q14697;F5H6X6;Q14697-2;E9PKU7;E9PNH1	Q14697;F5H6X6;Q14697-2;E9PKU7	-1.4661	-0.472802	-0.312278	-0.651651					0.868363	0.647491	0.593713	0.758201	-0.799826	-0.944578	-0.359416	-0.553223	-0.789363	-0.845123	-0.479133	-0.550476	4	7	22	16	8	10	9	11	11	17	17	20	8	10	9	23
GAPDH	Glyceraldehyde-3-phosphate dehydrogenase	P04406;P04406-2;E7EUT5;O14556	P04406;P04406-2;E7EUT5	-0.140842	-0.129807	0.0726468	0.154244					0.542791	0.541388	0.478006	0.434152	0.138696	0.0662903	-0.0128552	0.520391	0.10537	0.021299	0.000163485	0.416079	13	13	16	16	17	16	14	15	13	14	16	15	17	16	12	14
GAR1	H/ACA ribonucleoprotein complex subunit 1	Q9NY12;Q9NY12-2	Q9NY12;Q9NY12-2	-0.134765	1.00484	-0.0709213	0.0734376					0.540951	0.210543	0.521472	0.468538	0.282483	0.207369	0.251346	-0.0321142	0.392485	0.157809	NaN	NaN	2	2	1	2	0	1	0	1	2	2	0	1	1	0	0	1
GARS	Glycine--tRNA ligase	P41250;H7C443	P41250	-0.207992	-0.228526	-0.564172	-0.0160693					0.563049	0.57259	0.665807	0.506891	-0.222574	-0.0477672	-0.298187	0.180467	-0.290441	-0.111461	-0.268057	0.165784	10	10	14	11	8	10	10	12	7	11	12	14	8	10	9	13
GART	Trifunctional purine biosynthetic protein adenosine-3;Phosphoribosylamine--glycine ligase;Phosphoribosylformylglycinamidine cyclo-ligase;Phosphoribosylglycinamide formyltransferase	P22102;P22102-2;F8WD69;C9JBJ1;C9JTV6;C9JZG2;C9JKQ7;H7C366	P22102;P22102-2	-1.50857	-0.725865	-1.38086	-2.55442					0.875153	0.719439	0.852786	0.996984	0.898328	0.78998	0.190481	1.23702	0.949914	0.77501	0.201874	0.929472	4	8	12	9	3	5	1	3	6	8	17	17	9	9	4	11
GBE1	1,4-alpha-glucan-branching enzyme	Q04446;E9PGM4	Q04446;E9PGM4	1.14412	1.32009	-0.0496181	0.158934					0.191331	0.145268	0.515026	0.432169	-0.135837	-0.143859	-0.109633	0.32003	0.00402537	-0.132171	-0.118794	0.330604	10	11	10	12	12	11	10	10	7	9	11	8	11	12	7	11
GCLM	Glutamate--cysteine ligase regulatory subunit	P48507;P48507-2	P48507;P48507-2	-0.297519	1.60325	-0.0970906	-0.493266					0.589795	0.0996297	0.529383	0.702036	NaN	-1.30089	NaN	-1.37151	NaN	-0.649585	NaN	NaN	0	0	2	2	0	0	0	0	0	0	1	0	0	0	0	1
GCN1L1	Translational activator GCN1	Q92616	Q92616	0.868197	0.11631	-0.0970906	1					0.253837	0.462902	0.529383	0.141186	-0.517836	-0.437712	-0.0985289	-0.552271	-0.729529	-0.623514	NaN	-0.340429	16	16	29	22	0	1	1	2	7	10	23	15	0	1	0	0
GDI2	Rab GDP dissociation inhibitor beta	P50395;P50395-2;Q5SX87;Q5SX91;V9GYF8;Q5SX90;Q5SX86;V9GYJ7	P50395;P50395-2;Q5SX87	0.495835	0.462807	0.559791	0.286524					0.352589	0.355485	0.335405	0.379036	-0.328366	-0.117331	0.12738	-0.0354838	-0.541335	-0.145533	0.385262	-0.0487297	10	7	15	11	4	2	4	7	5	8	14	12	3	3	4	6
GFPT1	Glutamine--fructose-6-phosphate aminotransferase [isomerizing] 1	Q06210-2;Q06210	Q06210-2;Q06210	0.355293	0.267856	0.0268137	0.0121885					0.393157	0.415093	0.491878	0.494773	-0.476868	-0.501584	0.145856	-0.301734	-0.652006	-0.515911	0.216892	-0.293592	20	16	21	20	15	13	17	16	13	17	25	22	12	13	14	23
GGH	Gamma-glutamyl hydrolase	Q92820	Q92820	-2.51655	1.75234	0.588911	-0.54944					0.972584	0.0803027	0.327384	0.722623	0.782087	NaN	0.334555	NaN	NaN	0.10485	-0.550937	NaN	0	0	3	0	2	0	2	0	1	2	0	0	1	0	1	2
GIGYF2	PERQ amino acid-rich with GYF domain-containing protein 2	Q6Y7W6-4;Q6Y7W6-5;Q6Y7W6;Q6Y7W6-3;I1E4Y6;C9JHW1;E7ESB6;C9JH18	Q6Y7W6-4;Q6Y7W6-5;Q6Y7W6;Q6Y7W6-3;I1E4Y6;C9JHW1;E7ESB6	-1.83699	-0.137467	-0.860016	-0.505951					0.919496	0.543821	0.743119	0.706745	0.99404	NaN	NaN	NaN	NaN	-1.79563	NaN	NaN	1	1	1	1	1	0	1	0	1	1	3	3	0	1	1	1
GIPC1	PDZ domain-containing protein GIPC1	O14908;K7EM11;O14908-2;K7ELJ2	O14908;K7EM11;O14908-2	-0.234125	-0.317226	1.17478	0.602993					0.570892	0.600249	0.1862	0.258421	NaN	-0.267771	0.0578118	NaN	NaN	-0.241251	0.104416	NaN	1	0	2	2	2	0	1	0	0	1	2	1	0	0	0	0
GIT2	ARF GTPase-activating protein GIT2	F8VXI9;Q14161-4;Q14161-3;Q14161;Q14161-6;F8W822;Q14161-2;Q14161-11;R4GNG3;Q14161-7;Q14161-10;F8WAK2;Q14161-8;Q14161-5;Q14161-9	F8VXI9;Q14161-4;Q14161-3;Q14161;Q14161-6;F8W822;Q14161-2;Q14161-11;R4GNG3;Q14161-7;Q14161-10;F8WAK2;Q14161-8;Q14161-5;Q14161-9	-0.114026	-0.751793	-0.68296	-1.15243					0.534667	0.726391	0.697965	0.892304	NaN	NaN	NaN	NaN	-1.92881	NaN	NaN	NaN	3	0	2	1	0	0	0	0	2	1	2	1	1	0	1	2
GLG1	Golgi apparatus protein 1	Q92896;Q92896-3;Q92896-2;H3BM42	Q92896;Q92896-3;Q92896-2	-0.297519	-1.62456	-0.0970906	0					0.589795	0.903325	0.529383	0.5	-1.2112	-1.56816	NaN	-1.14568	NaN	-1.1087	NaN	NaN	0	0	2	1	0	0	0	0	0	0	4	1	0	0	0	0
GLO1	Lactoylglutathione lyase	Q04760-2;Q04760	Q04760-2;Q04760	1.85562	1.67585	-0.0970906	-0.493266					0.0784022	0.0898316	0.529383	0.702036	0.51127	1.07042	NaN	1.16825	0.404573	0.635727	NaN	NaN	2	3	1	3	0	0	0	0	0	1	1	1	0	0	0	1
GLRX	Glutaredoxin-1	P35754	P35754	-0.826222	-0.751793	-0.0970906	0					0.735795	0.726391	0.529383	0.5	-1.53813	-1.1671	NaN	-1.54584	NaN	-0.880153	NaN	NaN	0	0	2	1	0	0	0	0	0	1	2	1	0	0	0	0
GLRX3	Glutaredoxin-3	O76003	O76003	0.822885	0.627523	2.78221	0.0734376			+		0.265038	0.30768	0.0173231	0.468538	0.211408	0.346385	0.340996	-0.132567	0.314274	0.328788	0.31728	NaN	5	7	5	7	4	3	0	1	3	3	7	6	1	1	0	1
GLUD1;GLUD2	Glutamate dehydrogenase 1, mitochondrial;Glutamate dehydrogenase 2, mitochondrial	P00367;P49448;P00367-3;P00367-2	P00367;P49448;P00367-3;P00367-2	-0.248431	-1.48081	-0.0970906	0					0.575174	0.882116	0.529383	0.5	-0.273008	-0.810621	NaN	NaN	NaN	-0.644247	NaN	NaN	0	1	4	1	0	0	0	0	0	1	6	2	0	0	0	0
GMDS	GDP-mannose 4,6 dehydratase	O60547-2;O60547	O60547-2;O60547	-0.924448	-0.742941	-0.145512	-0.445978					0.759715	0.724027	0.543987	0.684183	NaN	NaN	NaN	NaN	NaN	-0.649607	-1.25676	0.488443	1	0	1	2	2	0	1	4	0	2	1	2	0	2	3	4
GMFB	Glia maturation factor beta	P60983;G3V4P8;G3V3X4;M0QYG8;M0R1D2;M0R0C1;M0QYJ8;O60234	P60983;G3V4P8	-0.0591487	0.647189	-0.681145	0					0.517999	0.302166	0.697484	0.5	-0.322644	-0.158026	NaN	0.23365	-0.0384599	-0.176055	NaN	NaN	0	3	3	2	0	1	0	0	1	2	2	1	0	1	0	0
GMPPA	Mannose-1-phosphate guanyltransferase alpha	Q96IJ6;Q96IJ6-2;A0A087WUI8	Q96IJ6;Q96IJ6-2	0.294579	1.39456	-0.0970906	0					0.411077	0.132088	0.529383	0.5	NaN	NaN	NaN	NaN	NaN	-0.72256	NaN	NaN	1	0	3	0	0	0	0	0	0	0	0	0	0	0	0	0
GMPS	GMP synthase [glutamine-hydrolyzing]	P49915;P49915-2	P49915;P49915-2	0.764288	1.38033	0.773969	0.306292					0.279887	0.134541	0.278381	0.370978	0.912973	0.850595	0.201397	0.57262	0.910602	0.933945	0.32527	-0.218016	4	6	6	8	6	6	4	3	3	4	5	5	4	4	1	2
GNAI2	Guanine nucleotide-binding protein G(i) subunit alpha-2	P04899;P04899-4;P04899-6;P04899-3;P04899-5;P04899-2;P63096;P08754;P63096-2;P09471-2;P09471;A0A087WTB6;A2A2R6;Q5JWD1;H0Y7E8;H3BTM2;A0A087WZE5;C9JPP4;P11488;P19087;A8MTJ3;P38405;P38405-2	P04899;P04899-4;P04899-6;P04899-3;P04899-5;P04899-2	-0.42623	-0.0762679	0.0825973	0.0795899					0.627496	0.524346	0.474997	0.465908	-0.862561	-0.594883	-0.508026	-0.0879889	-0.726429	-0.483999	-0.45796	0.252284	2	2	4	4	3	4	1	3	1	2	3	2	2	3	2	2
GNB2;GNB4	Guanine nucleotide-binding protein G(I)/G(S)/G(T) subunit beta-2;Guanine nucleotide-binding protein subunit beta-4	P62879;C9JIS1;C9JXA5;C9JZN1;E7EP32;Q9HAV0;F6X3N5;C9JD14;P62879-2;F5H8J8;F5H100;F5H0S8;P16520-2;E9PCP0;P16520;H7C5J5;Q9BRK4	P62879;C9JIS1;C9JXA5;C9JZN1;E7EP32;Q9HAV0	0.128858	0.868247	-0.484345	-0.000472036					0.460838	0.243473	0.643471	0.500202	-0.48753	-0.498468	-0.507864	-0.0918385	-0.0423094	-0.435294	-0.560652	0.138499	4	6	5	4	5	4	3	5	3	4	4	4	7	4	3	6
GNB2L1	Guanine nucleotide-binding protein subunit beta-2-like 1	P63244;J3KPE3;H0YAF8;H0Y8W2;H0YAM7;D6RAC2;D6RHH4;D6R9Z1;D6R9L0;D6REE5;D6RFX4;D6RF23;D6RFZ9;H0Y8R5;D6RAU2;E9PD14;D6RBD0;H0Y9P0;D6RHJ5;D6RGK8;D6R909;D6RDI0	P63244;J3KPE3;H0YAF8;H0Y8W2;H0YAM7;D6RAC2;D6RHH4;D6R9Z1;D6R9L0;D6REE5;D6RFX4	-0.296969	0.0750487	0.0808258	-0.351191					0.589632	0.476042	0.475533	0.647111	-0.0118157	0.0218035	0.354995	-0.37105	-0.153172	0.0107159	0.255378	-0.330949	12	13	16	17	16	18	14	15	14	16	16	16	17	17	16	16
GNG12	Guanine nucleotide-binding protein G(I)/G(S)/G(O) subunit gamma-12	Q9UBI6	Q9UBI6	-0.286829	-0.394773	-0.0970906	0					0.586621	0.624029	0.529383	0.5	-0.79529	-0.632424	NaN	0.235966	-0.841156	-0.575306	NaN	NaN	2	1	2	2	0	0	0	0	2	1	2	2	0	0	0	0
GNL3	Guanine nucleotide-binding protein-like 3	Q9BVP2-2;Q9BVP2;C9JYH9;C9JZT7;B4DMU5	Q9BVP2-2;Q9BVP2	1.38959	0.0241331	-0.0970906	0					0.144504	0.492292	0.529383	0.5	0.678741	0.552981	0.236755	-0.287302	0.964358	1.71878	NaN	NaN	2	2	1	2	0	0	0	0	2	1	0	1	1	0	0	0
GNPDA1;GNPDA2	Glucosamine-6-phosphate isomerase 1;Glucosamine-6-phosphate isomerase 2	P46926;D6R917;D6RB13;P46926-2;D6RAY7;D6R9P4;Q8TDQ7-3;Q8TDQ7-2;Q8TDQ7;D6RFF8	P46926;D6R917;D6RB13;P46926-2;D6RAY7;D6R9P4;Q8TDQ7-3;Q8TDQ7-2;Q8TDQ7;D6RFF8	-1.51655	-0.66132	-0.0970906	-0.671177					0.8764	0.701769	0.529383	0.764705	-0.551883	-0.198195	NaN	NaN	NaN	-0.522845	NaN	NaN	0	0	2	1	0	0	0	0	0	1	2	1	0	0	1	0
GNPNAT1	Glucosamine 6-phosphate N-acetyltransferase	G3V5E4;Q96EK6;G3V4W4	G3V5E4;Q96EK6;G3V4W4	1.49443	0.0598573	0.68916	0					0.127081	0.480888	0.300395	0.5	0.390667	0.369984	-0.0603382	NaN	0.630498	0.452321	NaN	NaN	1	1	1	1	0	1	0	0	0	0	1	2	0	1	0	0
GOLGA2	Golgin subfamily A member 2	A0A0C4DGS5;Q08379;Q08379-2;B7ZC06;H0Y7B8;A0A087WYC0;Q9NVV4-2	A0A0C4DGS5;Q08379;Q08379-2;B7ZC06	-0.297519	1.04987	-0.0970906	0.602993					0.589795	0.200288	0.529383	0.258421	-0.798292	-0.718397	NaN	NaN	NaN	-0.484205	NaN	NaN	0	0	2	1	0	0	1	0	0	0	1	0	0	0	0	0
GOLGA3	Golgin subfamily A member 3	Q08378-2;Q08378;Q08378-4	Q08378-2;Q08378;Q08378-4	0.702481	2.49911	-0.0970906	0.566704		+			0.295973	0.0226987	0.529383	0.271193	-0.630906	-0.573842	-0.188598	-0.5765	NaN	-0.480607	NaN	0.911692	1	2	7	3	0	0	0	2	0	1	1	0	0	0	0	1
GOLGB1	Golgin subfamily B member 1	Q14789-4;Q14789-3;Q14789;Q14789-2;E7EU81;H7C5I7;H0Y867	Q14789-4;Q14789-3;Q14789;Q14789-2	5.17066	5.64	3.90291	4.39491	+	+	+	+	3.98e-05	3.15e-06	0.00152133	1.15e-06	NaN	-0.543778	NaN	NaN	-0.771119	-0.757305	-0.0198607	-0.562648	10	5	12	11	1	2	3	3	0	0	0	0	0	0	0	0
GOPC	Golgi-associated PDZ and coiled-coil motif-containing protein	Q9HD26;Q9HD26-2;F5H1Y4;Q9HD26-3	Q9HD26;Q9HD26-2;F5H1Y4;Q9HD26-3	8.32323	7.939	7.80706	7.9333	+	+	+	+	1.07e-10	1.03e-10	1.54e-09	7.42e-18	NaN	-0.394631	NaN	NaN	-1.29279	-1.18784	-0.240706	-1.16129	27	26	28	23	19	17	23	23	0	1	1	0	0	0	0	1
GOT2	Aspartate aminotransferase, mitochondrial	P00505;P00505-2	P00505;P00505-2	0.713778	0.468926	0.580437	1.21192					0.293001	0.353662	0.32971	0.0963178	0.48992	0.227657	-0.0222923	0.166882	0.467543	0.198247	0.0125293	-0.0399164	2	3	5	4	2	2	2	2	1	3	4	2	1	2	1	2
GPI	Glucose-6-phosphate isomerase	P06744;P06744-2;A0A0A0MTS2;K7EQ48;K7EPY4;CON__Q3ZBD7;K7EP41;K7ELR7;K7ENA0;Q8N196	P06744;P06744-2;A0A0A0MTS2;K7EQ48	-0.207551	0.041093	-1.2523	-0.179908					0.562917	0.486876	0.829159	0.576678	0.23577	0.202577	-0.101855	0.783236	-0.452475	0.0555228	-0.072745	0.741089	0	2	3	7	4	4	4	4	0	1	5	3	4	6	3	6
GPX4	Glutathione peroxidase;Phospholipid hydroperoxide glutathione peroxidase, mitochondrial	K7ERP4;P36969-2;A0A087X2I2;P36969;A0A087WT12;K7EKX7;R4GNE4;K7ENB4;K7EJ20;A0A087X247;A0A0A0MTT1	K7ERP4;P36969-2;A0A087X2I2;P36969;A0A087WT12;K7EKX7;R4GNE4;K7ENB4;K7EJ20;A0A087X247;A0A0A0MTT1	0.398118	2.08663	-0.0970906	1.5337		+		+	0.380649	0.0473915	0.529383	0.0496014	-0.848877	-0.457601	0.766096	-0.375735	1.23987	-0.553939	NaN	-0.519094	2	0	2	1	0	0	2	1	1	0	1	0	0	0	1	1
GREM1;GREM2	Gremlin-1;Gremlin-2	O60565-2;O60565;Q9H772	O60565-2;O60565;Q9H772	0.65547	1.48541	-0.0970906	0.566704					0.308486	0.117157	0.529383	0.271193	-1.68741	-1.95372	-0.259306	-1.68463	-1.96345	NaN	NaN	NaN	1	1	2	0	0	0	0	1	1	0	1	0	0	0	0	0
GRHPR	Glyoxylate reductase/hydroxypyruvate reductase	Q9UBQ7;U3KQ56	Q9UBQ7;U3KQ56	-2.21229	-1.28793	-0.125592	-0.178189					0.954299	0.848777	0.537985	0.575954	-0.674334	-0.422323	-0.585971	0.0638982	NaN	-0.439187	NaN	0.155144	0	0	5	3	1	0	0	3	1	3	7	2	1	1	0	3
GRN	Granulins;Acrogranin;Paragranulin;Granulin-1;Granulin-2;Granulin-3;Granulin-4;Granulin-5;Granulin-6;Granulin-7	P28799;P28799-2;P28799-3;K7EQ05;K7EKL3;K7EMR1;K7EQI0;K7EPL0;K7ENI2;K7ENN1;K7EK92;K7EQK6;K7EM89;K7EJY4;K7ERM2;K7ELY1	P28799;P28799-2;P28799-3;K7EQ05;K7EKL3	-0.501278	-0.661008	-0.550708	-0.188353					0.648952	0.701683	0.662078	0.58023	-1.69999	-1.89742	NaN	NaN	-1.03235	-0.926874	-0.476805	-1.08348	15	13	16	16	17	18	15	15	17	16	17	19	19	19	18	19
GRPEL1	GrpE protein homolog 1, mitochondrial	Q9HAV7	Q9HAV7	2.17378	1.17238	-0.0970906	0	+				0.0485913	0.173946	0.529383	0.5	1.10293	0.5234	-0.082214	1.06365	1.44857	0.470179	NaN	NaN	4	3	2	2	1	1	0	0	2	1	3	0	0	1	0	0
GRSF1	G-rich sequence factor 1	H0Y8R1;F5H5I6;H0YAK1;Q12849;Q12849-5;H0YAM1	H0Y8R1;F5H5I6;H0YAK1;Q12849;Q12849-5	4.74753	3.65333	2.17478	0	+	+	+		0.000145869	0.00172177	0.0493423	0.5	0.40167	-0.565798	0.0329169	NaN	0.0255199	-0.386459	0.104551	NaN	5	4	6	3	3	1	0	0	0	0	1	0	0	0	0	0
GSPT1	Eukaryotic peptide chain release factor GTP-binding subunit ERF3A	P15170-2;P15170-3;P15170;H3BR35;H3BSV8	P15170-2;P15170-3;P15170;H3BR35	-2.21229	-0.542006	0.129436	-2.49327					0.954299	0.667843	0.460856	0.996322	0.148657	0.194944	0.0951939	0.292855	-0.0118523	0.0855385	0.11863	NaN	2	1	6	3	3	2	1	0	2	4	4	4	4	3	1	3
GSTO1	Glutathione S-transferase omega-1	P78417;Q5TA02;P78417-2;P78417-3;Q5TA01	P78417;Q5TA02;P78417-2;P78417-3;Q5TA01	-0.936628	0.833169	0.902909	0.136461					0.762597	0.252357	0.246495	0.441686	0.157169	0.259297	0.859559	0.214492	NaN	0.197807	NaN	0.258497	1	0	4	2	1	1	0	1	1	0	2	1	1	1	0	1
GSTP1	Glutathione S-transferase P	P09211;A8MX94;A0A087X2E9;A0A087X243	P09211;A8MX94	0.872473	0.832162	0.573697	0.302165					0.252793	0.252615	0.331565	0.372655	-0.631312	-0.411432	-0.233578	-0.148602	-0.635695	-0.340875	-0.127228	-0.170639	6	5	8	7	6	6	6	6	4	5	6	6	7	6	4	8
GTF2F2	General transcription factor IIF subunit 2	P13984	P13984	0.280273	1.60325	0.460278	0					0.415329	0.0996297	0.363365	0.5	0.472495	0.53591	0.452294	NaN	NaN	0.380996	NaN	NaN	0	1	2	1	1	0	0	0	0	0	0	1	1	0	0	0
GTF2I	General transcription factor II-I	P78347-2;P78347-4;P78347-3;P78347;P78347-5;C9J6M0;A0A087WW90;A0A0D9SF80;Q86UP8-3;Q86UP8;Q6EKJ0;A0A0A0MSY2	P78347-2;P78347-4;P78347-3;P78347	1.94928	0.78059	1.88562	1.96495				+	0.0684588	0.265988	0.0761133	0.0173291	0.488371	0.464843	-0.160596	0.135545	0.314963	0.443616	-0.314457	0.0209378	8	8	12	13	10	7	9	6	3	4	9	8	3	4	3	6
GYS1	Glycogen [starch] synthase, muscle	P13807-2;P13807;M0QYU1	P13807-2;P13807	-0.297519	-0.359996	-0.0691062	-0.561396					0.589795	0.613417	0.520923	0.726913	-0.109783	-0.207017	-0.442424	1.1313	NaN	NaN	NaN	1.02459	0	0	0	0	1	1	2	2	0	1	0	0	0	2	1	4
H1F0	Histone H1.0;Histone H1.0, N-terminally processed	P07305;P07305-2	P07305;P07305-2	-0.0109964	-1.02195	-2.81377	-1.47623					0.503347	0.793389	0.983678	0.943739	2.93366	2.35219	0.00261093	1.76376	1.89751	2.62469	0.0649767	1.34681	2	4	2	3	1	3	1	3	4	3	2	5	3	5	2	6
H1FX	Histone H1x	Q92522	Q92522	-0.719727	0.388968	0.351127	-0.558001					0.708558	0.377736	0.394887	0.725698	2.27272	1.91507	-0.197504	1.776	NaN	1.93899	-0.194229	0.979269	0	1	1	2	2	2	1	1	1	1	0	1	3	1	1	2
H2AFV;H2AFZ	Histone H2A.V;Histone H2A.Z;Histone H2A	Q71UI9;P0C0S5;Q71UI9-4;Q71UI9-2;C9J0D1;Q71UI9-3;C9J386	Q71UI9;P0C0S5;Q71UI9-4;Q71UI9-2;C9J0D1;Q71UI9-3;C9J386	-0.0223915	0.0948406	0.171575	1.04634					0.506816	0.469735	0.448175	0.130332	1.6218	1.28972	-0.110121	1.00932	2.03984	1.44177	-0.127525	1.09731	2	3	2	2	2	2	2	2	2	2	2	2	2	2	1	1
H2AFX	Histone H2A.x	P16104;Q71UI9-5;REV__H0Y672;REV__E7EQ67;REV__H7BY63;REV__Q8NB25-4;REV__Q8NB25-2;REV__A0A087X2A7;REV__Q8NB25-3;REV__Q8NB25	P16104	-0.288455	0.160658	0.455047	0.295919					0.587104	0.448824	0.364856	0.375199	NaN	0.607107	-0.168704	0.63856	0.577103	NaN	0.315761	NaN	2	2	2	0	1	0	0	0	0	1	0	0	2	0	0	0
H2AFY	Core histone macro-H2A.1;Histone H2A	O75367-2;O75367-3;O75367;B4DJC3;D6RCF2	O75367-2;O75367-3;O75367;B4DJC3	0.778811	0.616374	0.714335	0.82922					0.276169	0.310826	0.293779	0.186353	0.0705193	0.188427	0.0611141	-0.0347279	0.125553	0.156332	0.136489	-0.0463084	9	6	7	12	9	7	7	9	5	7	9	8	7	6	3	8
H3F3B;H3F3A;H3F3C	Histone H3;Histone H3.3;Histone H3.3C	K7EK07;P84243;K7EMV3;B4DEB1;K7ES00;K7EP01;Q6NXT2	K7EK07;P84243;K7EMV3;B4DEB1;K7ES00;K7EP01;Q6NXT2	0.0432409	-0.065078	0.375958	0.314307					0.48684	0.520778	0.387647	0.367726	0.820689	0.633393	NaN	NaN	1.50362	0.65542	0.0503939	NaN	3	3	1	2	1	0	1	0	0	0	0	1	0	0	0	0
HADHA	Trifunctional enzyme subunit alpha, mitochondrial;Long-chain enoyl-CoA hydratase;Long chain 3-hydroxyacyl-CoA dehydrogenase	P40939;H0YFD6;P40939-2	P40939	-0.826222	-2.45512	-0.0970906	0					0.735795	0.975335	0.529383	0.5	-0.858373	-0.825298	NaN	NaN	NaN	NaN	NaN	NaN	0	0	0	0	0	0	0	0	0	1	3	0	0	0	0	0
HAL	Histidine ammonia-lyase	P42357-2;P42357;F8W0V1;P42357-3;F8VNX0	P42357-2;P42357;F8W0V1;P42357-3	-0.297519	-0.359996	-0.0970906	1.84572				+	0.589795	0.613417	0.529383	0.0236191	NaN	NaN	NaN	NaN	NaN	NaN	NaN	-3.59903	0	0	0	0	0	0	3	0	0	0	0	0	0	0	0	0
HAT1	Histone acetyltransferase type B catalytic subunit	O14929;O14929-2;F8W9G7	O14929;O14929-2	1.17378	0.987376	0.712641	1					0.185224	0.214601	0.294222	0.141186	1.42945	1.00114	-0.211994	1.41547	1.32824	0.878743	-0.185662	NaN	2	2	2	1	4	4	1	1	0	1	0	1	3	3	0	0
HBS1L	HBS1-like protein	B7Z524;H0YDX7;J3QT46;Q9Y450-4;Q9Y450;H0YES5;E9PHZ9;E9PS53	B7Z524;H0YDX7;J3QT46;Q9Y450-4;Q9Y450	0.280273	0.0866263	0.449525	-0.0681843					0.415329	0.472352	0.366433	0.529216	0.244758	0.0753926	-0.0891274	0.45608	-0.155327	-0.0142218	0.0367919	NaN	2	1	1	3	3	4	1	1	1	0	3	0	3	3	1	0
HCFC1	Host cell factor 1;HCF N-terminal chain 1;HCF N-terminal chain 2;HCF N-terminal chain 3;HCF N-terminal chain 4;HCF N-terminal chain 5;HCF N-terminal chain 6;HCF C-terminal chain 1;HCF C-terminal chain 2;HCF C-terminal chain 3;HCF C-terminal chain 4;HCF C-terminal chain 5;HCF C-terminal chain 6	P51610-2;P51610;P51610-4;A6NEM2;P51610-3;H7C1C4	P51610-2;P51610;P51610-4;A6NEM2;P51610-3	-1.44893	1.27864	-0.860561	0.109726					0.865547	0.152973	0.743253	0.453051	0.631638	0.411903	-0.0317566	0.50031	0.731083	0.532827	0.240957	NaN	2	1	5	2	2	4	1	0	2	1	3	3	2	3	0	1
HDAC1	Histone deacetylase 1	Q13547;Q5TEE2	Q13547;Q5TEE2	1.03723	1.24896	-1.9025	0					0.214343	0.158655	0.925705	0.5	NaN	NaN	NaN	NaN	NaN	1.04142	NaN	NaN	1	1	1	1	0	0	0	0	0	0	0	0	0	2	0	0
HDAC2	Histone deacetylase 2	Q92769-3;Q92769;E5RFI6;E5RJ04;E5RGV4;E5RHE7;E5RH52;E5RG37;E5RFP9;H3BM24;E5RK19	Q92769-3;Q92769	0.621059	0.772729	0.526914	1.39153					0.317789	0.268058	0.344551	0.0673398	0.944091	0.670354	0.0368333	0.310367	0.658817	0.460333	0.00658834	0.324538	3	5	5	3	6	5	3	4	2	3	2	2	4	4	2	3
HDGF	Hepatoma-derived growth factor	P51858;P51858-2;P51858-3;Q5TGJ6	P51858;P51858-2;P51858-3	0.280273	1.29945	3.60964	2.58496			+	+	0.415329	0.149071	0.0030652	0.00272758	0.538292	0.545332	0.396438	0.139613	NaN	0.570998	0.449111	0.249244	1	1	2	2	5	5	2	3	0	0	1	2	0	0	2	0
HDLBP	Vigilin	A0A024R4E5;Q00341;Q00341-2;H0Y394;H7C0A4;H7BZC3;H7C2D1;C9JIZ1;C9J5E5;C9JZI8;C9JHS7;C9JHZ8;C9JES8;C9JT62;C9JK79;C9JBS3;C9JEJ8;A0A0E3D6N3;C9JHN6;C9JMQ6;C9JQ82;C9JHS9;C9J739;H7C3D0	A0A024R4E5;Q00341;Q00341-2;H0Y394	0.181626	-0.174225	2.68023	2.02407			+	+	0.444888	0.555471	0.0209233	0.0147817	-0.603417	-0.696901	-0.296522	-0.542085	-0.949065	-0.708178	-0.334892	-0.466858	35	31	42	30	29	31	32	36	22	21	39	32	9	14	18	25
HERC4	Probable E3 ubiquitin-protein ligase HERC4	Q5GLZ8-6;Q5GLZ8-3;Q5GLZ8-2;Q5GLZ8;H0Y6K7	Q5GLZ8-6;Q5GLZ8-3;Q5GLZ8-2;Q5GLZ8	0.280273	0.504462	0.460278	0.693286					0.415329	0.343141	0.363365	0.228049	-0.818592	-0.838227	-0.016844	-1.09794	NaN	-1.05818	NaN	-1.16367	0	1	4	1	1	0	2	0	0	0	4	1	0	0	0	2
HEXB	Beta-hexosaminidase subunit beta;Beta-hexosaminidase subunit beta chain B;Beta-hexosaminidase subunit beta chain A	P07686;Q5URX0;H0YA83;H0Y9B6	P07686;Q5URX0;H0YA83	-1.10219	1.03879	-0.0970906	0					0.799829	0.202782	0.529383	0.5	NaN	NaN	NaN	NaN	-1.23202	-0.89794	NaN	NaN	1	4	5	0	0	0	0	0	3	6	1	1	0	0	0	0
HEXIM1	Protein HEXIM1	O94992	O94992	-1.29752	-2.60104	-0.0691062	0					0.838926	0.981354	0.520923	0.5	NaN	NaN	NaN	NaN	NaN	NaN	NaN	NaN	0	0	0	0	0	1	0	0	1	1	2	2	0	1	0	0
HGS	Hepatocyte growth factor-regulated tyrosine kinase substrate	O14964-2;O14964;I3L2H4;I3L165;I3L1P5;I3L1E3	O14964-2;O14964;I3L2H4;I3L165	-0.297519	-1.53824	-0.0970906	0.566704					0.589795	0.890954	0.529383	0.271193	-0.156311	0.321751	NaN	NaN	NaN	-0.641967	NaN	NaN	0	1	2	1	0	0	0	1	0	0	2	1	0	0	0	0
HINT1	Histidine triad nucleotide-binding protein 1	P49773;D6REP8;D6RE99;D6RD60;D6RC06	P49773;D6REP8;D6RE99;D6RD60	0.577054	0.413709	-0.0970906	-1.49327					0.329855	0.370231	0.529383	0.945783	-0.0378282	-0.251482	0.550326	-1.44859	0.0663117	-0.120128	NaN	-1.49249	3	3	3	4	0	0	2	1	2	1	2	4	0	0	2	3
HIST1H1B	Histone H1.5	P16401	P16401	-0.291556	-0.606648	-0.783432	-0.728286					0.588025	0.686418	0.724026	0.783161	1.32947	0.950704	-0.0798881	0.523405	1.28303	0.941923	0.0405924	0.465244	9	9	10	10	8	8	5	6	9	11	10	10	10	11	8	9
HIST1H1C	Histone H1.2	P16403	P16403	-0.35591	-0.184025	-0.43187	-0.993982					0.607024	0.558569	0.62851	0.857361	2.10497	1.63585	0.0875648	0.988128	1.93742	1.68498	0.176381	0.972302	9	8	9	8	7	6	4	7	7	10	9	9	7	7	5	9
HIST1H1D	Histone H1.3	P16402;P22492	P16402	0.821561	-1.0792	-1.5404	-1.20206					0.265369	0.806228	0.878918	0.901861	1.73997	1.37356	0.21052	0.884768	1.57556	1.25024	0.154902	0.80803	2	4	2	1	2	2	1	1	2	2	2	2	2	2	1	2
HIST1H1E	Histone H1.4	P10412	P10412	-1.58596	0.248961	-2.41018	-1.35058					0.886887	0.421001	0.966375	0.926733	2.01145	1.27501	-0.0337011	0.746998	1.53947	NaN	-0.106411	0.792745	1	1	0	1	1	0	1	1	1	2	1	0	3	3	1	1
HIST1H4A	Histone H4	P62805	P62805	-0.332352	-0.106208	0.319941	0.386791					0.600096	0.533884	0.404032	0.338777	1.20093	0.924182	0.0327677	0.445916	1.39048	1.08763	0.0711083	0.52261	10	9	10	10	8	8	8	7	9	9	9	10	9	8	8	7
HIST2H2AC;HIST2H2AA3	Histone H2A type 2-C;Histone H2A type 2-A	Q16777;Q6FI13	Q16777;Q6FI13	-0.262938	-0.0902876	-0.071828	-0.533936					0.579506	0.528815	0.521747	0.717011	1.26568	0.929604	0.0545441	0.421186	1.34272	1.02714	0.0377544	0.500005	6	6	5	5	4	5	5	5	6	5	5	6	5	4	4	4
HIST2H3A	Histone H3.2	Q71DI3	Q71DI3	2.87002	0.413194	-0.0970906	0	+				0.0142648	0.370386	0.529383	0.5	1.41179	1.00831	0.0441213	0.418688	1.5896	1.0449	0.0445827	0.545984	7	7	7	7	6	5	4	5	5	5	7	6	4	4	5	5
HIST2H3PS2	Histone H3	Q5TEC6	Q5TEC6	-0.297519	0.609031	0.122278	0.127984					0.589795	0.312906	0.463014	0.445285	NaN	NaN	NaN	NaN	NaN	NaN	NaN	NaN	1	1	1	1	1	1	1	1	1	1	1	1	1	1	1	1
HK1	Hexokinase-1	P19367;P19367-4;P19367-2;P19367-3;B1AR63;B1AR62;B1AR61;Q2TB90;Q2TB90-3;Q2TB90-2	P19367;P19367-4;P19367-2;P19367-3	1.99913	1.02354	3.8658	1.73918			+	+	0.0635791	0.206247	0.00166656	0.0307677	-0.0409434	-0.0545959	-0.0163036	-0.116937	-0.110255	-0.0376581	-0.0129281	0.0191126	18	22	23	17	17	12	11	11	6	9	11	10	3	3	4	8
HK2	Hexokinase-2	E9PB90;P52789	E9PB90;P52789	1.01148	2.22497	3.39177	2.311		+	+	+	0.220119	0.0374192	0.00500764	0.0064896	0.417204	0.753109	-0.419241	0.988791	NaN	0.491819	-0.0548939	0.203466	0	2	3	3	7	8	2	2	0	0	1	0	0	1	0	1
HLA-A	HLA class I histocompatibility antigen, A-3 alpha chain;HLA class I histocompatibility antigen, A-11 alpha chain;HLA class I histocompatibility antigen, A-36 alpha chain;HLA class I histocompatibility antigen, A-1 alpha chain	Q5SRN7;P04439;Q5SRN5;P13746;P30455;P30443;P13746-2;P30685;P30498;P30495;P30491;P30490;P30484;P30464;P18465;P18464;P10319;P30457;P30447;P05534;Q31611;Q6DU44;P13747;Q95365;Q29836;Q29718;Q04826;P30488;P30487;P30485;P30483;P30481;P30475;P30461;P03989;P01893;P01889;P30456;P30450;P18462;Q09160;P30501;P04222	Q5SRN7;P04439;Q5SRN5;P13746;P30455;P30443;P13746-2	-0.297519	0.778687	-0.0970906	0					0.589795	0.266488	0.529383	0.5	-0.284326	-0.0853313	0.329418	-0.0737455	NaN	-0.51301	NaN	NaN	0	0	2	1	0	0	0	0	0	0	3	1	1	0	0	0
HLTF	Helicase-like transcription factor	Q14527-2;A0A0C4DGA6;Q14527;H7C5K0	Q14527-2;A0A0C4DGA6;Q14527;H7C5K0	-0.297519	-0.359996	-0.137321	0					0.589795	0.613417	0.54152	0.5	NaN	NaN	-1.40523	NaN	NaN	NaN	-0.598373	NaN	0	0	0	0	2	1	0	0	0	0	0	0	1	2	0	0
HMGA1	High mobility group protein HMG-I/HMG-Y	P17096;P17096-3;E5RIT9	P17096;P17096-3	-1.74622	-0.882861	0.655275	-0.671177					0.90864	0.760178	0.309406	0.764705	0.913646	0.647219	1.92743	-1.66044	NaN	0.504029	2.00474	NaN	1	1	1	2	1	2	0	1	3	3	1	1	1	1	1	0
HMGB1;HMGB1P1	High mobility group protein B1;Putative high mobility group protein B1-like 1	Q5T7C4;P09429;B2RPK0	Q5T7C4;P09429;B2RPK0	0.885589	0.651664	0.481052	0.329068					0.249604	0.300917	0.357462	0.361763	1.35717	1.18288	0.106863	0.814466	1.36691	1.17742	0.157976	0.69504	8	7	9	8	8	8	8	8	5	7	8	8	7	8	7	8
HMGB2	High mobility group protein B2	P26583;D6R9A6	P26583;D6R9A6	2.86594	-0.467824	0.618931	0.339662	+				0.0143781	0.64601	0.319199	0.357504	1.84593	1.63402	-0.210024	1.56716	1.92416	1.73719	-0.116416	1.55303	4	5	4	5	7	6	6	6	1	2	4	5	6	5	4	6
HMGN2	Non-histone chromosomal protein HMG-17	P05204;Q15651-2;Q15651;A0A087WZE9	P05204	-0.0672159	0.409802	1.10353	-0.559163					0.520452	0.371413	0.201047	0.726114	1.01536	1.05519	-0.538024	1.20315	0.92428	1.11974	-0.488414	1.18039	2	2	1	1	3	3	2	1	3	2	1	2	3	2	2	1
HNRNPA0	Heterogeneous nuclear ribonucleoprotein A0	Q13151	Q13151	-0.0198135	0.0508838	-0.221146	-0.0673363					0.506031	0.483751	0.566674	0.528853	0.649762	0.567703	-0.111471	0.140877	0.557227	0.635278	-0.0554569	-0.0392388	10	11	8	10	12	13	10	9	8	10	10	10	12	12	11	10
HNRNPA1;HNRNPA1L2	Heterogeneous nuclear ribonucleoprotein A1;Heterogeneous nuclear ribonucleoprotein A1-like 2	P09651-3;F8W6I7;P09651-2;P09651;F8VZ49;Q32P51;F8VTQ5;F8W646;H0YH80;F8VYN5	P09651-3;F8W6I7;P09651-2;P09651;F8VZ49;Q32P51;F8VTQ5;F8W646	0.169648	-0.0533825	0.120271	0.125393					0.448502	0.517046	0.46362	0.446386	0.798318	0.63508	0.0150649	0.335052	0.793599	0.746903	0.0478189	0.134456	17	16	16	16	16	15	16	16	16	16	16	15	16	16	16	16
HNRNPA2B1	Heterogeneous nuclear ribonucleoproteins A2/B1	P22626;P22626-2;A0A087WUI2	P22626;P22626-2;A0A087WUI2	-0.0642593	-0.186692	0.19962	0.129129					0.519553	0.559412	0.439764	0.444799	0.642247	0.463952	-0.0566802	0.266386	0.651346	0.530907	-0.0230138	0.047784	20	21	20	20	24	23	20	21	22	22	23	21	23	22	21	22
HNRNPA3	Heterogeneous nuclear ribonucleoprotein A3	P51991	P51991	-0.0830928	-0.251688	0.230362	-0.0513467					0.525277	0.579853	0.430576	0.52201	0.506883	0.449374	-0.0563491	0.276703	0.529111	0.469223	-0.00560351	0.0556035	14	15	15	14	22	22	17	18	14	13	15	16	19	20	18	17
HNRNPAB	Heterogeneous nuclear ribonucleoprotein A/B	Q99729-3;D6R9P3;D6RD18;D6RBZ0;A0A087WZV1;Q99729-2;Q99729-4;Q99729	Q99729-3;D6R9P3;D6RD18;D6RBZ0;A0A087WZV1;Q99729-2;Q99729-4;Q99729	0.338841	-0.238712	0.362384	-0.0958772					0.397992	0.575787	0.3916	0.541046	0.921792	0.871866	0.0351216	0.616529	0.921771	0.964467	0.104298	0.468752	10	10	10	10	12	11	7	7	8	11	10	11	11	9	6	9
HNRNPC	Heterogeneous nuclear ribonucleoproteins C1/C2	B2R5W2;G3V4C1;P07910-2;G3V4W0;B4DY08;P07910-4;G3V2D6;G3V5X6;G3V3K6;G3V251	B2R5W2;G3V4C1;P07910-2;G3V4W0;B4DY08;P07910-4;G3V2D6	0.0554387	-0.0532349	0.057373	0.371628					0.483129	0.516999	0.482627	0.344762	1.01039	0.782035	0.0184249	0.379442	1.01875	0.76637	0.053396	0.18153	17	16	15	17	19	19	16	14	17	17	15	16	19	18	15	12
HNRNPD	Heterogeneous nuclear ribonucleoprotein D0	Q14103-3;Q14103;H0Y8G5;D6RAF8;D6RD83	Q14103-3;Q14103;H0Y8G5;D6RAF8	0.279966	-0.0181849	0.118178	0.446485					0.41542	0.505808	0.464251	0.315623	0.664125	0.583239	-0.0658295	0.333965	0.620897	0.622995	-0.0391785	0.220537	17	17	16	16	16	18	15	14	14	15	17	15	16	15	16	14
HNRNPF	Heterogeneous nuclear ribonucleoprotein F;Heterogeneous nuclear ribonucleoprotein F, N-terminally processed	P52597	P52597	0.81451	-0.146371	0.367911	-0.0179518					0.267136	0.546647	0.389989	0.507698	0.554196	0.667718	0.0174709	0.454742	0.545689	0.635799	0.0270183	0.359556	9	8	9	9	12	11	5	8	4	8	10	10	7	10	6	5
HNRNPH1	Heterogeneous nuclear ribonucleoprotein H;Heterogeneous nuclear ribonucleoprotein H, N-terminally processed	P31943;G8JLB6;E9PCY7;D6RBM0;D6RIU0;E5RGV0;D6RFM3;D6RAM1;D6R9T0;D6RIT2;E7EN40;D6RDU3;D6RJ04;D6RIH9;E7EQJ0;H0YB39;D6RDL0;H0YBD7;E5RGH4;D6RF17;H0YBG7;D6R9D3;H0YAQ2;E5RJ94	P31943;G8JLB6;E9PCY7;D6RBM0;D6RIU0;E5RGV0;D6RFM3;D6RAM1;D6R9T0;D6RIT2;E7EN40;D6RDU3;D6RJ04;D6RIH9	-0.108156	-0.349	0.110844	0.118546					0.532886	0.610043	0.466464	0.449297	0.577748	0.416592	-0.048668	0.092824	0.512869	0.407907	-0.00207648	-0.110032	12	9	11	15	16	16	12	14	10	10	15	13	15	15	13	12
HNRNPH3	Heterogeneous nuclear ribonucleoprotein H3	P31942-2;P31942;P31942-3;P31942-4;P31942-6;P31942-5	P31942-2;P31942;P31942-3	-0.137766	0.0279461	-0.0784963	0.60571					0.54186	0.491074	0.523763	0.257478	0.832876	0.697395	-0.153584	0.566025	0.78531	0.724635	-0.102986	0.299001	4	6	7	7	6	6	6	6	5	6	7	5	7	6	4	6
HNRNPK	Heterogeneous nuclear ribonucleoprotein K	P61978-3;Q5T6W2	P61978-3;Q5T6W2	-0.137153	-0.397833	0.0540089	0.251954					0.541674	0.624959	0.483645	0.393253	0.616022	0.421633	-0.0740916	0.193621	0.519273	0.501432	-0.0265648	0.00388279	21	22	19	21	20	20	19	20	19	22	22	21	21	19	19	20
HNRNPL	Heterogeneous nuclear ribonucleoprotein L	P14866;M0QXS5;P14866-2;M0QYT0;M0R1W6;M0R076;B4DVF8;M0QYL7	P14866;M0QXS5;P14866-2	-0.493331	-0.586071	0.00983886	0.35245					0.646701	0.680554	0.49702	0.352386	0.847056	0.691312	0.00802638	0.452412	0.725461	0.71075	0.0405162	0.314826	13	16	10	12	15	16	11	13	12	13	13	13	16	15	9	9
HNRNPLL;HNRPLL	Heterogeneous nuclear ribonucleoprotein L-like	Q8WVV9-5;B7WPG3;Q8WVV9-4;C9IYN3;Q8WVV9;D6W592;Q8WVV9-3;C9JJZ7;H7C464	Q8WVV9-5;B7WPG3;Q8WVV9-4;C9IYN3;Q8WVV9;D6W592;Q8WVV9-3	-0.297519	-0.359996	-3.62124	-2.31486					0.589795	0.613417	0.997016	0.993586	0.0525071	0.218662	-0.00840552	0.328289	NaN	NaN	-0.11765	0.36478	0	0	0	0	2	2	1	1	0	0	0	1	5	5	3	1
HNRNPM	Heterogeneous nuclear ribonucleoprotein M	P52272-2;P52272;A0A087X0X3;M0R019;M0R2T0;M0R0N3;M0R2I7;M0QYQ7;M0QY96;M0R0Y6;M0QYL3	P52272-2;P52272;A0A087X0X3	-0.120238	-0.185728	0.332189	0.934655					0.53655	0.559107	0.400434	0.157506	0.521602	0.441998	-0.0270256	0.0441531	0.170621	0.465237	0.0438378	-0.168796	25	27	20	18	29	23	23	24	21	23	24	21	25	19	22	16
HNRNPR;HNRPR	Heterogeneous nuclear ribonucleoprotein R	O43390;O43390-3;B4DT28	O43390;O43390-3;B4DT28	-0.145457	-0.452265	-0.0254307	0.318955					0.544187	0.641366	0.507703	0.365845	0.693366	0.576599	-0.0302308	0.274907	0.459749	0.492536	-0.0291468	0.146007	22	22	20	23	23	22	20	19	22	23	23	26	25	24	17	19
HNRNPU	Heterogeneous nuclear ribonucleoprotein U	Q00839;Q5RI18	Q00839	-0.255881	-0.401516	0.00583573	0.22981					0.5774	0.626077	0.498232	0.402436	0.832279	0.563108	-0.00979337	0.181109	0.63563	0.524246	-0.00312264	0.0664073	25	25	23	22	22	22	19	19	24	25	24	20	22	21	18	21
HNRNPUL1	Heterogeneous nuclear ribonucleoprotein U-like protein 1	Q9BUJ2-2;Q9BUJ2;Q9BUJ2-4;A0A0A0MRA5;B7Z4B8;Q9BUJ2-3;M0R3F1;M0QYZ0;M0R0K8;M0R203;M0QZV6;M0QYI8;Q9BUJ2-5;M0QYM5;M0R247;A0A087X1I2	Q9BUJ2-2;Q9BUJ2;Q9BUJ2-4;A0A0A0MRA5;B7Z4B8;Q9BUJ2-3;M0R3F1;M0QYZ0	2.59429	0.67478	2.48293	2.10399	+		+	+	0.0238781	0.294504	0.0296992	0.0118549	0.374269	0.462329	-0.068252	0.157222	0.362781	0.477162	-0.0444054	0.0615712	16	20	13	15	23	23	19	18	8	8	12	10	8	10	8	6
HNRNPUL2;hCG_2044799	Heterogeneous nuclear ribonucleoprotein U-like protein 2	Q1KMD3;H3BQZ7	Q1KMD3;H3BQZ7	-0.316846	-0.359951	-0.230624	0.591522					0.595519	0.613403	0.569502	0.262424	0.422051	0.422304	-0.097286	0.23205	0.195354	0.331511	-0.0853521	-0.0061413	12	9	9	12	11	11	9	11	10	11	13	11	9	10	7	7
HNRPDL	Heterogeneous nuclear ribonucleoprotein D-like	A0A087WUK2;O14979	A0A087WUK2;O14979	0.697693	-0.0551642	0.216206	0.225318					0.297237	0.517615	0.434802	0.404306	0.595311	0.472763	-0.0401985	0.0243794	0.461327	0.443041	0.020571	-0.101048	6	8	8	7	9	8	7	6	4	6	10	7	8	8	6	4
HP1BP3	Heterochromatin protein 1-binding protein 3	Q5SSJ5;Q5SSJ5-2;X6RGJ2;Q5SSJ5-3;B0QZK4;Q5SWC8;B0QZK8;Q5SSJ5-5;B0QZK9	Q5SSJ5;Q5SSJ5-2;X6RGJ2;Q5SSJ5-3;B0QZK4;Q5SWC8	-0.603483	0.12341	0.514948	0.795628					0.677414	0.460645	0.347903	0.196191	0.121905	0.15346	-0.355936	-0.110869	-0.0774076	0.0807937	NaN	0.12301	4	3	6	3	0	2	0	2	6	3	4	3	0	0	1	1
HPCAL1;HPCA;NCALD	Hippocalcin-like protein 1;Neuron-specific calcium-binding protein hippocalcin;Neurocalcin-delta	P37235;E9PC71;P84074;P61601;C9JW46;E5RK89;E5RFL9;E5RJT1;E5RJJ6;E5RGZ0;E5RI95;E5RHE8;E5RI78;E5RHC8;E5RIG4;E5RIZ1;E5RIA5;E5RGA9	P37235;E9PC71;P84074;P61601	0.280273	1.62237	-0.0970906	0					0.415329	0.0969763	0.529383	0.5	1.73321	0.612733	1.87827	-1.17435	NaN	0.686878	NaN	NaN	0	1	3	1	0	0	0	0	0	0	1	0	0	0	0	0
HRG	Histidine-rich glycoprotein	P04196	P04196	2.17913	1.9404	2.65709	2.07344	+		+	+	0.0481809	0.0601385	0.0218232	0.0129084	NaN	NaN	NaN	NaN	2.98204	1.10173	2.89032	0.372982	3	2	3	2	1	1	1	2	1	1	1	1	0	1	0	1
HSD17B10	3-hydroxyacyl-CoA dehydrogenase type-2	Q99714;Q99714-2;Q5H928	Q99714;Q99714-2;Q5H928	0.705469	0.0211064	2.31886	-0.384491			+		0.295186	0.493259	0.0391483	0.660317	0.0907945	-0.15686	NaN	NaN	0.089721	-0.0752727	0.4015	NaN	5	7	8	6	3	3	0	1	3	4	9	5	0	1	1	2
HSD17B11	Estradiol 17-beta-dehydrogenase 11	D6RCD0;Q8NBQ5	D6RCD0;Q8NBQ5	-0.297519	-0.359996	4.56307	5.21679			+	+	0.589795	0.613417	0.000265469	1.02e-08	NaN	-0.854459	1.99935	-2.12134	NaN	NaN	0.142444	-1.20454	0	0	0	0	6	5	8	5	0	0	0	0	0	0	0	0
HSD17B4	Peroxisomal multifunctional enzyme type 2;(3R)-hydroxyacyl-CoA dehydrogenase;Enoyl-CoA hydratase 2	P51659;E7EWE5;P51659-3;P51659-2;E7ER27;G5E9S2;E7ET17;E7EPL9	P51659;E7EWE5;P51659-3;P51659-2;E7ER27;G5E9S2;E7ET17;E7EPL9	-0.755232	-0.764453	0.254246	-0.37269					0.717783	0.729755	0.423462	0.655659	-1.12806	-0.929362	-0.246212	-0.551258	-1.31333	-1.00918	-0.16511	-0.650397	7	9	11	8	7	5	10	10	10	9	13	11	5	7	9	13
HSP90AA1	Heat shock protein HSP 90-alpha	P07900;P07900-2;G3V2J8;Q58FG0;Q14568;Q58FG1	P07900;P07900-2	-0.328627	-0.123133	0.0796057	-0.00372327					0.598998	0.539268	0.475901	0.501597	0.713445	0.275012	0.0910514	0.489362	0.602112	0.242398	0.114091	0.450667	14	13	18	16	15	13	15	18	14	17	18	15	13	13	15	19
HSP90AB1	Heat shock protein HSP 90-beta	P08238;Q58FF7	P08238	-0.335886	-0.212887	-0.105064	-0.0976635					0.601138	0.567672	0.531791	0.541808	0.804634	0.4126	0.219499	0.464781	0.603576	0.402527	0.231621	0.453614	28	28	34	29	27	29	31	33	28	35	35	32	30	27	31	36
HSP90B1	Endoplasmin	P14625;Q96GW1;H0YIV0;Q58FF3;F8W026;F8VPC7	P14625	-0.805427	-0.767263	-0.542514	-0.295422					0.73058	0.730498	0.659801	0.624598	-0.639232	-0.902768	-0.110069	-0.931966	-0.867071	-1.03808	-0.192157	-0.941701	14	15	21	16	9	10	9	14	11	15	26	23	13	15	12	18
HSPA12A	Heat shock 70 kDa protein 12A	O43301;K7ENF6	O43301	-3.93285	-3.46337	-0.68296	0					0.998654	0.997223	0.697965	0.5	-0.794739	-0.992351	NaN	NaN	NaN	-0.617552	NaN	NaN	1	1	1	1	0	0	0	0	4	7	6	4	1	0	0	0
HSPA1B	Heat shock 70 kDa protein 1B	P0DMV9;P0DMV8;P0DMV8-2;V9GZ37	P0DMV9;P0DMV8;P0DMV8-2;V9GZ37	-0.219984	-0.278412	-0.464577	-0.0246783					0.566651	0.588199	0.63786	0.510582	1.18166	0.196654	-0.0147886	0.26654	1.12188	0.192625	0.0520045	0.182338	8	11	11	10	4	5	5	9	8	11	11	11	6	4	5	9
HSPA4	Heat shock 70 kDa protein 4	P34932;A0A087WYC1;A0A087WTS8;P34932-2	P34932;A0A087WYC1;A0A087WTS8	0.262502	0.455245	-1.34472	0.70653					0.420624	0.357743	0.846378	0.223769	0.349241	0.301022	0.451828	0.0341928	0.407531	0.250588	0.390187	0.504764	3	5	9	5	2	3	2	1	4	4	4	4	2	2	1	1
HSPA5	78 kDa glucose-regulated protein	P11021	P11021	-0.607816	-0.497348	-0.505891	-0.142203					0.678599	0.654762	0.649552	0.560749	-0.683311	-1.07688	-0.294077	-0.683541	-0.759367	-1.11678	-0.367047	-0.568889	27	28	31	27	26	21	23	22	29	31	32	31	24	22	25	28
HSPA6;HSPA7	Heat shock 70 kDa protein 6;Putative heat shock 70 kDa protein 7	P17066;P48741	P17066;P48741	-0.183546	-0.183619	-0.10997	0.185314					0.55569	0.558441	0.533272	0.421048	0.66736	0.172016	0.0388127	0.117036	0.632309	0.250108	0.0020862	0.106224	1	1	1	1	1	1	1	1	1	1	1	1	1	1	1	1
HSPA8	Heat shock cognate 71 kDa protein	P11142;E9PKE3;P11142-2;E9PNE6;A8K7Q2;E9PN89;E9PLF4;E9PQQ4;E9PQK7;E9PK54;E9PS65;E9PPY6;E9PN25;E9PM13;E9PI65	P11142;E9PKE3;P11142-2;E9PNE6;A8K7Q2;E9PN89	-0.18323	-0.0324406	-0.0912254	0.0720881					0.555595	0.510361	0.527611	0.469115	0.706572	0.363083	0.124348	0.290574	0.619805	0.416199	0.130163	0.276704	33	32	35	31	30	27	25	26	32	35	33	33	26	27	23	27
HSPA9	Stress-70 protein, mitochondrial	P38646;D6RJI2;D6RA73;H0Y8S0;H0YBG6	P38646	2.14795	1.44878	3.32217	2.00475			+	+	0.0506109	0.123026	0.005827	0.0155763	1.01432	0.384905	0.173159	0.145583	1.15424	0.444395	0.25329	-0.0470865	27	28	26	22	16	15	13	12	7	15	20	15	4	6	4	4
HSPB1	Heat shock protein beta-1	P04792;F8WE04;C9J3N8	P04792;F8WE04	0.0819049	-0.219882	0.0925031	0.0530029					0.475084	0.569873	0.472003	0.477281	-0.78068	-1.23127	-1.04426	-0.58084	-0.682572	-1.18133	-0.982135	-0.574804	14	14	15	15	13	11	14	14	14	13	15	15	13	11	13	14
HSPB11	Heat shock protein beta-11	Q9Y547;A6NIR2;X6R7Y7	Q9Y547;A6NIR2;X6R7Y7	0.280273	2.64	1.24114	-0.433296		+			0.415329	0.0172679	0.173001	0.679319	0.801934	0.631088	-0.0694396	0.753113	NaN	0.769127	-0.0643236	NaN	0	1	2	2	2	2	0	1	0	0	0	1	1	1	1	1
HSPB6	Heat shock protein beta-6	O14558;K7EP04	O14558;K7EP04	2.6108	3.0795	1.27321	1	+	+			0.0231782	0.00683821	0.166841	0.141186	-2.81489	-2.72416	NaN	-2.26453	-2.17796	-1.91172	NaN	-1.61904	4	4	7	4	0	2	2	1	1	2	0	0	0	0	2	1
HSPD1	60 kDa heat shock protein, mitochondrial	P10809;E7EXB4;E7ESH4;P10809-2;C9JL25;C9JL19;C9JCQ4;C9J0S9	P10809	0.0901257	-0.347298	-0.314866	-0.0156364					0.472587	0.609521	0.594475	0.506706	1.21064	0.483872	0.208364	0.674011	1.24852	0.467605	0.344147	0.485548	5	9	14	9	2	0	3	4	6	6	17	10	1	1	3	5
HSPE1	10 kDa heat shock protein, mitochondrial	P61604;B8ZZL8;B8ZZ54	P61604;B8ZZL8	0.0834626	-0.449428	1.27726	-0.493266					0.474611	0.640517	0.166074	0.702036	1.18803	0.582419	0.299917	0.651143	1.008	0.592035	0.641967	NaN	6	3	5	4	2	2	0	0	3	4	5	4	1	1	0	1
HSPG2	Basement membrane-specific heparan sulfate proteoglycan core protein;Endorepellin;LG3 peptide	P98160;Q5SZJ2;Q5SZI9;Q5SZJ1	P98160	-0.297519	-0.975867	-3.50552	-0.671177					0.589795	0.7827	0.996112	0.764705	NaN	-0.355257	-1.25968	1.19764	NaN	NaN	NaN	NaN	0	0	0	0	1	2	0	0	0	0	0	1	0	13	1	0
HSPH1	Heat shock protein 105 kDa	Q92598-2;Q92598;Q92598-3;R4GN69	Q92598-2;Q92598;Q92598-3	-0.248431	2.00587	0.460278	0					0.575174	0.0541334	0.363365	0.5	0.628855	0.492955	0.529657	0.0265422	NaN	0.554107	NaN	NaN	0	1	2	2	1	0	0	0	0	1	1	1	0	0	0	0
HUWE1	E3 ubiquitin-protein ligase HUWE1	Q7Z6Z7-2;Q7Z6Z7-3;Q7Z6Z7;H0Y659	Q7Z6Z7-2;Q7Z6Z7-3;Q7Z6Z7	-0.123397	0.33868	-0.726785	0.931816					0.537507	0.39313	0.709468	0.158243	-0.110737	-0.237498	0.251976	0.057906	0.135991	0.128739	0.0274174	-0.0145589	1	1	2	1	0	1	1	1	1	0	1	0	1	1	1	1
HYOU1	Hypoxia up-regulated protein 1	A0A087X054;Q9Y4L1;E9PJ21;A0A087WWI4;K7EQK2;Q9Y4L1-2;J3QL06;J3KTF1;A0A087X214;A0A087WW13;Q9BST8;J3QQH7;J3QLE9	A0A087X054;Q9Y4L1;E9PJ21;A0A087WWI4;K7EQK2;Q9Y4L1-2	-0.826222	-0.913374	-0.0970906	-0.493266					0.735795	0.767704	0.529383	0.702036	-0.800859	-0.985733	NaN	NaN	NaN	-0.852642	NaN	NaN	0	0	3	2	0	0	0	0	0	1	5	2	0	0	0	1
IARS	Isoleucine--tRNA ligase, cytoplasmic	P41252;A0A0A0MSX9;J3KR24;Q5TCD1;Q5TCC6	P41252;A0A0A0MSX9;J3KR24	-0.630762	-0.450118	-0.318783	-0.0155493					0.684846	0.640724	0.595627	0.506668	-0.160826	-0.165403	-0.0765956	-0.0281668	-0.338169	-0.193518	-0.146107	-0.0421335	13	14	33	25	9	11	9	12	11	15	32	26	8	10	10	19
IARS2	Isoleucine--tRNA ligase, mitochondrial	Q9NSE4	Q9NSE4	0.280273	-0.0346492	-0.0970906	0					0.415329	0.511066	0.529383	0.5	0.476313	-0.801278	NaN	NaN	NaN	-0.824458	NaN	NaN	1	1	4	1	0	0	0	0	0	0	3	1	0	0	0	0
IDE	Insulin-degrading enzyme	P14735;P14735-2;Q5T5N3	P14735	-0.297519	0.0866263	0.460278	2.21165				+	0.589795	0.472352	0.363365	0.00871433	NaN	-0.162524	NaN	NaN	NaN	NaN	NaN	-3.59954	0	0	1	1	1	0	3	0	0	0	1	0	0	0	0	0
IDH2	Isocitrate dehydrogenase [NADP], mitochondrial	P48735-2;P48735;H0YL11	P48735-2;P48735	-0.297519	1.19896	-0.0691062	0.566704					0.589795	0.168536	0.520923	0.271193	-0.752018	-0.117124	-1.28957	0.342234	NaN	-0.532748	NaN	NaN	0	0	3	0	0	1	0	1	0	0	2	0	0	1	0	2
IFI16	Gamma-interferon-inducible protein 16	Q16666-3;Q16666-2;Q16666;Q16666-6;A0A0A0MRB1;H3BM18;X6RHM1;H3BVE6;H3BR88;X6RHR0;Q6K0P9-6;Q6K0P9-5;Q6K0P9-4;Q6K0P9-3;Q6K0P9-2;Q6K0P9;H3BR65	Q16666-3;Q16666-2;Q16666;Q16666-6	0.861828	-0.158041	0.998323	1.99457				+	0.255396	0.550347	0.224224	0.0160096	0.775392	0.709902	-0.0404826	0.20779	0.736547	0.788324	0.163716	0.493341	4	7	3	5	7	7	8	4	3	3	4	4	6	3	3	2
IFITM3;IFITM2;IFITM1	Interferon-induced transmembrane protein 3;Interferon-induced transmembrane protein 1;Interferon-induced transmembrane protein 2	E9PS44;Q01628;H7BYV1;E9PQN9;P13164;Q01629	E9PS44;Q01628;H7BYV1;E9PQN9;P13164;Q01629	-2.51655	-3.71894	-1.42065	-4.14					0.972584	0.998548	0.859632	0.999996	-0.79619	-0.348365	-0.636854	-0.365001	NaN	NaN	NaN	NaN	1	1	0	0	1	0	0	0	1	2	2	2	2	0	2	2
IGF2BP1	Insulin-like growth factor 2 mRNA-binding protein 1	Q9NZI8;Q9NZI8-2;REV__M0QZ54;REV__M0R118;REV__M0R0M7;REV__A0A087WWS7;REV__Q15833	Q9NZI8;Q9NZI8-2	-0.142953	-0.596035	0.51631	0.0093389					0.54343	0.683399	0.34752	0.495995	0.400753	0.383887	0.378697	0.020808	-0.0435782	0.369891	0.229132	0.0276417	4	4	8	9	2	5	6	6	3	6	13	10	2	3	3	6
IGF2BP2	Insulin-like growth factor 2 mRNA-binding protein 2	Q9Y6M1-1;Q9Y6M1;F8W930;Q9Y6M1-5;Q9Y6M1-6;Q9Y6M1-3;Q9Y6M1-4	Q9Y6M1-1;Q9Y6M1;F8W930;Q9Y6M1-5;Q9Y6M1-6;Q9Y6M1-3;Q9Y6M1-4	0.186696	-0.638567	-0.349579	0.157849					0.44336	0.695422	0.60466	0.432627	-0.00634388	0.107097	-0.226159	0.0654839	-0.153777	-0.0286173	-0.281457	0.0970993	5	5	12	12	5	7	10	12	8	6	12	11	7	10	11	15
IGF2BP3	Insulin-like growth factor 2 mRNA-binding protein 3	O00425;O00425-2;F8WD15	O00425	-0.0509398	-0.262154	-0.448948	-0.183511					0.515503	0.583126	0.633402	0.578194	-0.136666	-0.191383	0.00725688	-0.394928	-0.46176	-0.206295	0.0731896	-0.462802	12	12	15	14	11	12	13	11	10	12	17	13	12	11	10	14
IGF2R	Cation-independent mannose-6-phosphate receptor	P11717;S4R328	P11717	-1.92445	-0.660418	-1.68114	1					0.929005	0.701519	0.899103	0.141186	0.0096233	-0.0754727	0.0701893	0.0602273	-0.501584	-0.58923	NaN	NaN	2	1	4	1	1	1	1	1	1	4	6	1	1	2	1	2
IGHA1;IGHA2	Ig alpha-1 chain C region;Ig alpha-2 chain C region	P01876;P01877;A0A075B6N7	P01876;P01877	-4.19807	-0.359996	-0.576921	-0.493266					0.999321	0.613417	0.669323	0.702036	NaN	NaN	NaN	NaN	NaN	NaN	-2.71915	NaN	0	0	0	0	4	2	0	0	6	0	0	0	4	5	0	1
IGHG1;IGHG3	Ig gamma-1 chain C region;Ig gamma-3 chain C region	A0A0A0MS07;P01857;A0A0A0MS08;A0A087X1C7;A0A087X010;A0A087WV47;A0A087X079;A0A087WYE1;A0A087WYC5;P01860;A0A075B6N8;A0A087WXL8;A0A087WVW2;P01859;P01861	A0A0A0MS07;P01857;A0A0A0MS08;A0A087X1C7;A0A087X010;A0A087WV47;A0A087X079;A0A087WYE1;A0A087WYC5;P01860;A0A075B6N8;A0A087WXL8;A0A087WVW2	0.565553	-0.280541	-0.528329	-0.260782					0.333039	0.588862	0.655845	0.610393	NaN	NaN	NaN	NaN	4.96914	7.00847	7.54022	6.71143	3	3	3	3	3	3	3	3	4	3	3	3	5	4	3	3
IGKC	Ig kappa chain C region	A0A087X130;P01834;A0A087X1V9;A0A087WZW8;A0A075B6H6	A0A087X130;P01834;A0A087X1V9;A0A087WZW8;A0A075B6H6	-1.16601	-0.440124	0.0138816	-1.37427					0.813188	0.637728	0.495795	0.930209	NaN	NaN	NaN	NaN	3.25111	-4.19767	5.52339	NaN	1	1	1	1	1	1	1	1	4	3	1	1	1	3	1	1
IK	Protein Red	Q13123;Q9H4P6;E7EQZ7;D6REL4	Q13123;Q9H4P6;E7EQZ7;D6REL4	-0.234125	2.94734	-0.0970906	0		+			0.570892	0.00914155	0.529383	0.5	0.75799	0.38284	-0.095184	NaN	0.261151	0.66506	NaN	NaN	1	0	3	3	1	0	0	0	0	1	1	1	0	0	0	0
IKBIP	Inhibitor of nuclear factor kappa-B kinase-interacting protein	Q70UQ0;Q70UQ0-2;Q70UQ0-3	Q70UQ0;Q70UQ0-2	-3.82997	-2.68492	-2.90328	-3.53984					0.998263	0.984211	0.986252	0.999929	-0.974958	-1.10328	0.407676	-0.688152	NaN	-1.27213	NaN	NaN	1	1	3	2	0	0	0	0	6	5	6	5	0	0	1	1
IKBIP	Inhibitor of nuclear factor kappa-B kinase-interacting protein	Q70UQ0-4	Q70UQ0-4	-2.93663	-2.95891	-1.09709	-2.12746					0.987479	0.991084	0.797577	0.988903	-1.01504	-1.07149	-0.0359516	-0.633984	-1.16525	1.86793	NaN	NaN	1	2	3	3	0	0	0	1	7	5	7	8	3	4	4	4
IL1A	Interleukin-1 alpha	P01583	P01583	-0.297519	-0.359996	1.41496	0					0.589795	0.613417	0.141333	0.5	NaN	NaN	NaN	NaN	NaN	NaN	2.85926	NaN	0	0	0	0	2	4	0	0	0	0	0	0	1	2	0	0
ILF2	Interleukin enhancer-binding factor 2	Q12905;B4DY09;X6R6Z1;A0A0A0MRL0	Q12905;B4DY09	-0.17334	-0.140066	-0.0708417	-0.0794777					0.552612	0.544646	0.521448	0.534044	0.472612	0.535437	0.0469713	0.130344	0.386433	0.544904	0.00595979	0.0871266	13	12	16	14	9	8	8	8	8	12	15	12	9	9	6	6
ILF3	Interleukin enhancer-binding factor 3	Q12906-4;Q12906-6;Q12906-7;Q12906-5;Q12906-2;Q12906-3;Q12906;K7EKJ9;K7EQR9;K7ER69;K7EKY0;K7EJ09;K7ERM6;K7ENK6;K7EM82;K7EPG3;K7EQ75	Q12906-4;Q12906-6;Q12906-7;Q12906-5;Q12906-2;Q12906-3;Q12906	-0.1662	-0.334177	-0.153103	0.165147					0.550457	0.605482	0.546272	0.429545	0.642652	0.658963	0.0355251	0.0663206	0.39156	0.683804	0.0171621	0.026672	18	19	19	18	18	18	16	16	17	17	19	18	17	17	13	14
ILK	Integrin-linked protein kinase	Q13418;A0A0A0MTH3;Q13418-2;Q13418-3;A0A087WWY6	Q13418;A0A0A0MTH3;Q13418-2;Q13418-3	1.86766	-0.20002	-0.681145	-1.60319					0.0770659	0.563618	0.697484	0.957595	-0.551709	-0.700945	-0.553542	-0.148271	-1.07425	-1.22403	NaN	0.26415	2	1	2	1	0	1	2	0	1	0	2	1	0	1	0	2
IMMT	Mitochondrial inner membrane protein	Q16891-2;Q16891;B9A067;Q16891-3;H7C463;D6RAW4	Q16891-2;Q16891;B9A067;Q16891-3;H7C463	-2.24843	-1.52298	-0.0970906	0.136461					0.956885	0.888654	0.529383	0.441686	0.0351305	0.00634889	-0.0232133	-0.237076	-0.387248	-0.432697	NaN	-0.619271	1	2	14	5	0	0	0	2	5	11	14	6	0	0	0	2
IMPA1	Inositol monophosphatase 1	H0YBL1;P29218;P29218-3;E5RG13;E5RIP7	H0YBL1;P29218;P29218-3;E5RG13;E5RIP7	-0.938754	0.233009	1.90291	-0.493266					0.763098	0.426002	0.0742517	0.702036	NaN	NaN	NaN	NaN	0.355446	0.276151	0.010344	NaN	0	2	2	2	1	1	1	1	0	1	2	2	0	0	1	1
IMPDH2	Inosine-5-monophosphate dehydrogenase 2	H0Y4R1;P12268;E7ETK5;C9K0R9	H0Y4R1;P12268	0.801084	-0.680845	-0.346688	0.255254					0.270515	0.707168	0.603815	0.391889	0.616834	0.289648	-0.0680097	1.15595	1.21942	0.452649	0.125527	1.34399	2	3	9	5	3	4	6	10	0	3	9	7	3	3	3	11
INF2	Inverted formin-2	Q27J81-2;Q27J81;A0A0A0MQU1;Q27J81-3	Q27J81-2;Q27J81;A0A0A0MQU1	6.09244	6.59156	5.72859	6.87362	+	+	+	+	1.67e-06	6.54e-08	6.82e-06	7.39e-14	-0.738415	-0.564648	-0.129849	-0.324854	-0.978388	-0.581128	-0.334888	0.13671	44	40	48	43	15	14	21	20	2	2	4	4	0	0	0	1
INTS3	Integrator complex subunit 3	Q68E01-3;Q68E01-2;Q68E01;A0A096LNW8;Q68E01-4;H0Y8Z1	Q68E01-3;Q68E01-2;Q68E01;A0A096LNW8	1.28027	1.60325	-0.0970906	0					0.164311	0.0996297	0.529383	0.5	0.170599	0.319922	NaN	NaN	1.13049	0.133523	NaN	NaN	1	2	2	1	0	0	0	0	0	0	1	0	0	0	0	0
IPO4	Importin-4	Q8TEX9;Q8TEX9-2;H0YN14;H0YMR4;H0YLV0;H0YL92;H0YN07;H0YK93;H0YKG5	Q8TEX9;Q8TEX9-2;H0YN14	0.494426	-0.53996	-0.0970906	0					0.352989	0.667248	0.529383	0.5	0.387305	0.293353	NaN	NaN	0.00924509	0.306171	NaN	NaN	2	4	4	4	0	0	0	0	3	2	6	3	0	0	0	0
IPO5	Importin-5	O00410;O00410-3;H0Y8C6;O00410-2;E7ETV3;E7EQT5;C9JMV5;E7EV12;C9JZD8;E7EWK4;E7EX05;H0Y3V4;C9JZ53;C9JQT6;E7ESA1;E7ESZ1;E7ETV8;C9J875;C9JXE0	O00410;O00410-3;H0Y8C6;O00410-2	0.452939	0.0388171	-0.68296	-1.03649					0.364818	0.487603	0.697965	0.867409	0.14997	0.216239	-0.0633324	0.349741	-0.0309161	0.143831	NaN	0.294764	6	8	15	13	1	1	2	2	7	8	14	7	2	1	0	2
IPO7	Importin-7	O95373;E9PLB2;E9PLJ0	O95373	0.0612456	0.685811	-0.0970906	0					0.481363	0.291467	0.529383	0.5	0.421852	0.424359	0.181969	0.290196	0.671931	0.447727	NaN	NaN	1	2	8	3	0	1	0	0	1	1	5	3	0	0	0	0
IQGAP1	Ras GTPase-activating-like protein IQGAP1	P46940;H0YLE8;A0A087X225;A0A087WWP1;H0YKA5	P46940;H0YLE8	-0.860234	-0.433384	-0.68296	-2.24849					0.744213	0.635703	0.697965	0.992179	-0.376855	-0.0632688	-0.439778	0.16652	-0.408096	-0.264991	NaN	0.0960898	3	7	23	12	0	0	2	1	6	6	21	15	2	2	3	6
ISG15	Ubiquitin-like protein ISG15	A0A096LNZ9;A0A096LPJ4;P05161	A0A096LNZ9;A0A096LPJ4;P05161	0.293871	0.738633	-0.68296	0					0.411288	0.277127	0.697965	0.5	2.08802	2.22135	1.3741	-0.0338494	2.20956	2.28021	2.17424	NaN	3	3	3	3	1	1	0	0	2	2	3	3	1	1	0	0
ITGB1	Integrin beta-1	P05556;P05556-2;P05556-5;P05556-4;P05556-3;C9JPK5;H7C4N8;E7ERX5;Q5T3E6;E9PLR6;E7EUI6;E7EQW5;C9JJP8;Q5T3E5;E9PQJ2	P05556;P05556-2;P05556-5;P05556-4;P05556-3	-0.248431	-0.475899	3.46028	3.01354			+	+	0.575174	0.648412	0.00430309	0.000598535	-0.715777	-0.892208	-0.367005	-0.38585	NaN	-1.12981	-0.138243	-0.619832	1	1	3	3	3	4	2	3	0	2	6	1	1	1	2	0
ITGB6	Integrin beta-6;Integrin beta	P18564-2;A0A087WXP3;E9PEE8;P18564	P18564-2;A0A087WXP3;E9PEE8;P18564	-0.207551	-0.359996	2.11263	1.47926					0.562917	0.613417	0.0543486	0.0558937	-0.500722	-0.266718	-0.346142	-0.283759	NaN	NaN	-0.256767	-0.513346	0	1	0	0	1	1	1	1	0	1	0	0	1	0	1	1
ITIH3	Inter-alpha-trypsin inhibitor heavy chain H3	A0A087WW43;E7ET33;Q06033-2;Q06033	A0A087WW43;E7ET33;Q06033-2;Q06033	-0.297519	0.327772	0.460278	0.0734376					0.589795	0.396493	0.363365	0.468538	NaN	-2.49505	NaN	NaN	NaN	-3.31967	NaN	NaN	0	0	2	2	1	0	0	1	0	0	0	2	0	0	0	1
ITPR3	Inositol 1,4,5-trisphosphate receptor type 3	Q14573;Q14571-2;B7ZMI3;Q14643-4;Q14571;Q14643-3;Q14643-8;Q14643-7;Q14643-5;Q14643-6;Q14643-2;Q14643	Q14573	-0.297519	1.39456	-0.0970906	0					0.589795	0.132088	0.529383	0.5	0.58596	NaN	NaN	NaN	NaN	0.324243	NaN	NaN	0	1	2	1	0	0	0	0	0	0	0	0	0	0	0	0
JAK1	Tyrosine-protein kinase JAK1	P23458	P23458	-0.672518	-0.635667	-0.0970906	0					0.696078	0.694609	0.529383	0.5	NaN	-0.894382	NaN	NaN	-2.05666	-1.224	NaN	NaN	0	1	1	0	0	0	0	0	0	1	1	1	0	0	0	0
JUP	Junction plakoglobin	P14923;C9JTX4;C9J826;C9JK18;C9JKY1;C9JPI2;K7ERP3	P14923	-0.892299	-1.55826	-1.6681	1.0295					0.752019	0.89392	0.897343	0.134208	-0.954569	-0.174066	2.65406	-3.08641	2.01839	1.61111	-2.88026	-1.7003	1	2	9	5	6	2	11	0	6	1	17	13	12	5	5	3
KARS	Lysine--tRNA ligase	Q15046;Q15046-2;H3BVA8;J3KRL2;H3BPV7;H3BRC9	Q15046;Q15046-2	-1.98151	-0.870261	-1.48369	-1.07823					0.934728	0.757032	0.87003	0.876793	0.0654691	0.227838	0.31768	0.0539515	0.412899	0.048633	NaN	NaN	1	2	4	3	0	1	1	1	1	3	5	3	1	1	3	3
KHDRBS1	KH domain-containing, RNA-binding, signal transduction-associated protein 1	Q07666;Q07666-2;Q07666-3;Q5VWX1;Q9UBC1-2;Q5STV6;Q9UBC1-3;A0A0A0MRT5;Q9UBC1	Q07666;Q07666-2;Q07666-3	0.108083	-0.440438	0.305776	1.04985					0.467136	0.637822	0.408203	0.129533	0.674275	0.453494	-0.0194417	0.165031	0.437657	0.583826	0.0477008	0.316697	8	9	5	5	10	11	8	8	7	9	6	5	9	9	5	7
KHSRP	Far upstream element-binding protein 2	Q92945;A0A087WTP3;M0R0I5;M0QYH3;M0R3J3;M0QXW7;M0R0C6;M0R251;M0QYG1;M0R263	Q92945;A0A087WTP3;M0R0I5	2.04729	1.08816	2.24555	2.09259			+	+	0.0591262	0.191809	0.0440973	0.0122388	0.920558	0.827325	0.00160486	0.399431	1.03319	0.9455	0.0250017	0.387116	27	28	24	23	32	27	24	26	11	12	18	12	14	11	9	11
KIAA0196	WASH complex subunit strumpellin	Q12768;E7EQI7	Q12768;E7EQI7	0.212173	0.33868	-0.0970906	0					0.435694	0.39313	0.529383	0.5	-0.597242	-0.51109	NaN	-0.345956	-0.455222	-0.321742	NaN	NaN	2	2	4	1	0	0	0	0	2	1	4	2	0	0	0	0
KIAA1199	Protein KIAA1199	Q8WUJ3;Q8WUJ3-2	Q8WUJ3;Q8WUJ3-2	-1.29752	-0.751793	-0.0970906	-0.493266					0.838926	0.726391	0.529383	0.702036	NaN	-4.02071	NaN	NaN	NaN	NaN	NaN	NaN	0	0	1	1	0	0	0	0	1	1	2	1	0	0	0	1
KIAA1967	DBIRD complex subunit KIAA1967	Q8N163;Q8N163-2;H0YB24;G3V119;A0A087X2B6;E5RHJ4;E5RFJ3;H0YC69;E5RGU7;H0YC58;E5RHH8	Q8N163;Q8N163-2;H0YB24;G3V119	-3.90126	-3.18466	-3.21895	-3.74803					0.998544	0.994611	0.992739	0.999972	0.576242	0.640491	0.111536	0.209794	0.397773	0.720126	0.162577	0.428443	10	9	14	18	10	7	4	5	30	29	34	34	27	27	22	24
KIF23	Kinesin-like protein KIF23	Q02241;H7BYN4;Q02241-2;Q02241-3;H0YKQ5;H0YME6;H0YMJ4	Q02241;H7BYN4;Q02241-2;Q02241-3	1.01148	-0.359996	7.39138	5.43006			+	+	0.220119	0.613417	9.99e-09	2.65e-09	NaN	NaN	-0.213494	NaN	NaN	NaN	0.250089	2.82727	0	2	0	0	22	21	12	9	0	0	0	0	0	0	0	0
KIF2A	Kinesin-like protein KIF2A	O00139-2;O00139-1;O00139-5;O00139;O00139-4;D6R9M0;H0Y5Z9;H0Y8H2	O00139-2;O00139-1;O00139-5;O00139;O00139-4	3.50677	3.09282	-0.0970906	0	+	+			0.00372772	0.0066373	0.529383	0.5	0.291647	0.246494	0.247646	0.330856	0.262063	0.162312	NaN	NaN	8	7	3	4	0	0	0	0	0	0	0	0	0	0	0	0
KIF4A	Chromosome-associated kinesin KIF4A	O95239-2;O95239	O95239-2;O95239	1.71317	0.640004	1.65047	0					0.0955708	0.304175	0.105072	0.5	NaN	NaN	0.0278363	NaN	2.58181	NaN	-0.0393205	NaN	2	1	1	1	4	1	0	0	0	0	0	0	0	0	0	0
KIF5B	Kinesin-1 heavy chain	P33176;O60282;O60282-2	P33176	-0.588103	-0.851115	-0.182177	-0.23912					0.673192	0.752209	0.555007	0.601432	-0.183271	-0.0757962	-0.111773	0.121841	-0.368071	-0.0337796	-0.0802016	0.115531	9	11	19	15	16	18	12	17	7	8	26	14	13	14	13	20
KLC1	Kinesin light chain 1	G5E9S8;Q07866-8;G3V2E7;Q07866-2;Q07866-3;Q07866;F8W6L3;Q07866-7;G3V3H3;Q07866-5;Q07866-10;Q07866-6;G3V5R9;Q07866-4;Q07866-9;E7EVH7;H0YJU9;H0YJL0;H0YJT3;E9PQ02;H0YG16;A8MX29;Q9NSK0-5;Q9NSK0;Q9NSK0-3;G3V2P7;C9JZE5;C9J8T5;Q9NSK0-4	G5E9S8;Q07866-8;G3V2E7;Q07866-2;Q07866-3;Q07866;F8W6L3;Q07866-7;G3V3H3;Q07866-5;Q07866-10;Q07866-6;G3V5R9;Q07866-4;Q07866-9;E7EVH7	1.29458	0.233728	-0.0970906	0					0.161623	0.425776	0.529383	0.5	-0.184422	-0.275108	-0.196723	0.186798	-0.995351	-0.0320965	NaN	NaN	2	1	0	3	0	0	0	0	0	0	3	0	0	0	0	0
KPNA2	Importin subunit alpha-1	P52292;J3QLL0;J3KS65;J3QL07	P52292;J3QLL0;J3KS65	1.16301	0.200566	-0.0970906	0					0.187428	0.43621	0.529383	0.5	1.95769	1.06563	0.0616345	1.37747	NaN	NaN	NaN	NaN	1	1	1	1	0	0	0	0	0	1	0	0	0	0	0	0
KPNA3	Importin subunit alpha-4	O00505;H0Y4S9	O00505	0.499991	-0.215909	-0.0970906	0					0.351412	0.568624	0.529383	0.5	-0.0735668	0.0287935	0.29494	0.0164714	-0.070695	-0.227372	NaN	NaN	2	2	5	2	0	0	0	0	3	3	2	2	0	0	0	0
KPNA4	Importin subunit alpha-3	O00629;H7C4F6	O00629	3.1684	1.46355	-0.0970906	0	+				0.00781158	0.120636	0.529383	0.5	-0.0922534	-0.152236	NaN	NaN	-0.22352	-0.147914	NaN	NaN	2	2	2	2	0	0	0	0	0	1	2	2	0	0	0	0
KPNA6;KPNA5	Importin subunit alpha-7;Importin subunit alpha-6	O60684;Q5TFJ7;O15131;H0Y3K0;S4R3E5	O60684;Q5TFJ7;O15131	2.058	2.03113	-0.485052	0					0.0581699	0.0519473	0.643671	0.5	-0.392829	-0.405972	0.103396	-0.353679	-0.293483	-0.646511	NaN	NaN	2	2	3	2	0	1	0	0	1	1	1	0	1	1	0	0
KPNB1	Importin subunit beta-1	Q14974;Q14974-2;J3KTM9;J3QR48;J3QKQ5;J3KS06;J3QRG4	Q14974;Q14974-2;J3KTM9	0.272961	0.15869	0.514948	-0.314294					0.417506	0.449447	0.347903	0.632269	0.207888	0.320176	-0.0202614	0.278108	0.133892	0.294252	0.0940891	NaN	8	6	11	8	2	2	0	2	3	8	13	5	2	1	0	2
KPRP	Keratinocyte proline-rich protein	Q5T749	Q5T749	-3.41661	-1.32099	-1.05644	0.887141					0.995433	0.854898	0.788762	0.170122	NaN	2.42936	1.32716	0.304605	NaN	2.20765	0.837197	-2.92729	1	1	3	6	5	7	9	0	13	2	10	10	17	4	5	2
KRT2	Keratin, type II cytoskeletal 2 epidermal	P35908	P35908	-1.1096	-0.283075	-0.345443	0.0794487					0.801408	0.589651	0.60345	0.465969	1.94879	3.65622	2.88009	2.56491	3.15905	3.89617	3.55992	2.66263	28	32	55	46	51	43	42	31	47	40	54	54	63	37	33	37
KTN1	Kinectin	Q86UP2-2;Q86UP2-3;Q86UP2-4;Q86UP2;G3V4Y7;B7Z6P3;H0YJZ8;G3V5P0;G3V5G2;H0YJV5;H0YJP2;G8JLP4;Q9Y4F3-3;Q9Y4F3-4;Q9Y4F3-5;Q9Y4F3	Q86UP2-2;Q86UP2-3;Q86UP2-4;Q86UP2	-0.297519	0.84118	-0.0970906	0					0.589795	0.250313	0.529383	0.5	-0.255928	-0.244329	0.142304	-0.169889	NaN	-0.949675	NaN	NaN	1	0	3	1	0	0	0	0	0	0	1	0	0	0	0	0
LAMB1	Laminin subunit beta-1	E7EPA6;P07942;G3XAI2;E9PCS6;C9J296	E7EPA6;P07942;G3XAI2	0.372366	-0.491874	-0.470912	-1.33836					0.388156	0.653146	0.639661	0.924888	-1.03817	NaN	NaN	-0.330575	NaN	-3.19266	NaN	1.2492	0	1	1	1	1	1	1	1	1	0	1	0	0	1	1	2
LAMC1	Laminin subunit gamma-1	P11047	P11047	-0.297519	-0.894555	-0.0970906	0					0.589795	0.763078	0.529383	0.5	-1.27379	-1.64575	0.016751	0.26331	NaN	NaN	NaN	NaN	1	0	2	1	0	0	0	0	0	0	3	0	0	0	0	0
LAMTOR4	Ragulator complex protein LAMTOR4	Q0VGL1;A0A087X1E5;A0A087WVU0;A0A087WT92;A0A087WV46;C9JXA7	Q0VGL1;A0A087X1E5;A0A087WVU0;A0A087WT92;A0A087WV46;C9JXA7	-0.553156	-0.0290024	-0.68296	-0.493266					0.663516	0.509263	0.697965	0.702036	-1.1699	NaN	NaN	NaN	0.822994	3.14027	NaN	NaN	1	1	1	1	0	0	0	0	1	1	1	1	1	0	0	1
LANCL1	LanC-like protein 1	O43813;F8WDS9;E9PHS0	O43813;F8WDS9;E9PHS0	0.702481	-0.797157	0.874408	-0.54944					0.295973	0.738346	0.253371	0.722623	-0.282282	0.0757126	-0.125625	0.197259	NaN	0.198867	NaN	NaN	1	1	1	1	1	1	1	0	0	0	1	2	1	0	0	1
LARP1	La-related protein 1	Q6PKG0-3;Q6PKG0;A0A0B4J210;E5RH50;H0YBW1;H0YC73;H0YC33;Q659C4-7;Q659C4-6;Q659C4-5;H0YAN4;E5RHK4	Q6PKG0-3;Q6PKG0;A0A0B4J210;E5RH50	0.0291777	-1.25451	-0.68296	-0.493266					0.491119	0.842417	0.697965	0.702036	-0.0497517	-0.0496767	0.142126	0.351404	-0.323014	0.153098	NaN	NaN	2	1	5	5	1	1	0	0	0	2	8	5	1	0	0	1
LARP4B	La-related protein 4B	Q92615;H0Y641;H0Y4V9	Q92615;H0Y641;H0Y4V9	-0.297519	-0.359996	3.24114	0			+		0.589795	0.613417	0.00692886	0.5	NaN	NaN	NaN	NaN	NaN	NaN	-0.0629761	NaN	0	0	0	0	2	3	0	0	0	0	0	0	0	0	0	0
LARP7	La-related protein 7	Q4G0J3;Q4G0J3-3;D6RFF0;H0YA82;Q4G0J3-2;D6R9Z6;D6RF49;D6RAF3;D6RF22	Q4G0J3;Q4G0J3-3;D6RFF0	-3.98517	-4.98544	-0.376618	0.0154683					0.99882	0.999967	0.612545	0.493366	0.302424	0.218468	0.0876709	-0.143366	NaN	-0.208177	0.548617	-0.381056	1	0	3	2	4	5	5	4	3	3	11	13	7	5	5	5
LARS	Leucine--tRNA ligase, cytoplasmic	Q9P2J5;Q9P2J5-2;Q9P2J5-3;A0A087WXY1	Q9P2J5;Q9P2J5-2	-0.0118714	-0.25039	-0.430422	-0.360594					0.503614	0.579447	0.628094	0.650859	0.196164	0.195161	-0.0417345	0.168204	0.10556	0.180238	-0.0396701	0.0720812	7	14	19	17	12	11	7	12	9	11	21	15	9	12	7	15
LASP1	LIM and SH3 domain protein 1	Q14847;Q14847-2;C9J9W2;Q14847-3;F6S2S5;K7ESD6;J3KSN1;O76041-2	Q14847;Q14847-2;C9J9W2;Q14847-3	0.500865	0.45269	0.263959	0.5249					0.351165	0.358507	0.420577	0.286285	-0.963835	-0.700819	-0.993614	0.134205	-1.11209	-0.616703	-0.931834	0.106175	13	9	10	9	10	10	7	7	7	7	6	8	10	7	7	8
LBR	Lamin-B receptor	Q14739;C9JXK0;C9JES9	Q14739;C9JXK0	-0.297519	-0.36691	-0.0144764	-1.02005					0.589795	0.615534	0.504385	0.863583	1.35934	1.25754	-0.387563	1.80216	NaN	NaN	-0.357074	NaN	0	0	0	1	4	3	1	0	0	0	0	1	4	3	1	2
LDHA	L-lactate dehydrogenase A chain	P00338;P00338-3;P00338-4;P00338-5;P00338-2;F5GXY2;F5GYU2;F5GXH2;F5H5J4;F5H6W8;F5GZQ4;F5H8H6;F5GXC7;F5GWW2;F5GXU1;F5H5G7;F5H155;A0A087WUM2;G3XAP5;F5H245;Q6ZMR3;P07864	P00338;P00338-3;P00338-4;P00338-5;P00338-2	-0.128666	-0.0400196	-0.0686481	-0.0800578					0.539104	0.512781	0.520785	0.534292	1.02916	0.731241	-0.10445	1.48936	1.05036	0.745177	-0.117143	1.45837	10	11	14	13	13	13	10	13	11	13	14	14	15	13	11	14
LDHB	L-lactate dehydrogenase B chain;L-lactate dehydrogenase	P07195;A8MW50;C9J7H8;F5H793	P07195;A8MW50	-0.247814	0.149384	0.182358	0.0546603					0.574989	0.452397	0.444938	0.476572	0.25061	0.318392	0.117469	0.437229	0.0877561	0.306446	0.211565	0.450904	6	8	11	9	5	3	3	5	6	10	11	9	3	3	3	7
LEPRE1	Prolyl 3-hydroxylase 1	Q32P28-4;Q32P28;Q32P28-3;H7C2W6;Q32P28-2;E2QRI1;Q8IVL5-2	Q32P28-4;Q32P28;Q32P28-3	-0.831649	-0.370403	0.318855	-0.926562					0.737148	0.616602	0.404352	0.840389	-2.27635	-1.85277	NaN	-1.06838	-2.42285	-0.854875	-0.563443	-1.20127	1	2	4	2	1	1	2	3	2	1	5	3	1	1	2	5
LGALS1	Galectin-1	P09382;F8WEI7	P09382	-0.276654	0.243871	0.103174	-0.124614					0.583594	0.422595	0.46878	0.553283	-0.528094	-0.485718	-0.106042	-0.40669	-0.341903	-0.288501	0.0113152	-0.304092	8	8	7	8	8	9	7	7	8	9	9	9	8	8	9	8
LGALS3	Galectin-3	P17931;G3V3R6	P17931;G3V3R6	1.92149	1.08897	1.92326	1.26705					0.0713014	0.191632	0.0721048	0.0865854	-1.04446	-1.25029	0.120691	-0.872492	-1.15583	-1.09996	0.123703	-0.939804	3	4	5	4	2	3	4	6	3	4	3	4	1	1	2	5
LGALS3BP	Galectin-3-binding protein	Q08380;K7EP36;K7ESM3;K7EKQ5;K7EQT9;K7ES75;K7EN99;K7ERZ6;K7EJY8;K7EJD3	Q08380	-1.29752	-2.569	0.318855	-1					0.838926	0.980152	0.404352	0.858814	-1.3498	-0.295138	NaN	NaN	NaN	-0.948095	-0.0958468	NaN	1	1	3	3	2	1	0	0	2	2	12	6	1	1	1	1
LGALS7	Galectin-7	P47929	P47929	-0.297519	-0.352811	-0.68296	2.21165				+	0.589795	0.611214	0.697965	0.00871433	NaN	NaN	-0.847647	NaN	NaN	NaN	NaN	-2.00067	0	0	1	0	0	0	3	0	0	0	1	0	1	0	0	0
LIMA1	LIM domain and actin-binding protein 1	Q9UHB6;Q9UHB6-4;F8VQE1;Q9UHB6-2;Q9UHB6-5;F8VS07;Q9UHB6-3;F8VRN8	Q9UHB6;Q9UHB6-4;F8VQE1;Q9UHB6-2;Q9UHB6-5;F8VS07;Q9UHB6-3	-0.234125	-0.359996	1.46028	-0.178189					0.570892	0.613417	0.133768	0.575954	-0.59138	-0.627054	-0.739672	0.370017	NaN	NaN	NaN	NaN	1	0	0	0	1	1	0	2	0	1	0	0	0	0	0	1
LIMS1	LIM and senescent cell antigen-like-containing domain protein 1	P48059;P48059-4;P48059-2;P48059-5;P48059-3;C9JF46;Q7Z4I7-4;P0CW19-2;A0A0A6YYD2;A0A087X2F9;Q7Z4I7-3;Q7Z4I7;Q7Z4I7-5;Q7Z4I7-2	P48059;P48059-4;P48059-2;P48059-5;P48059-3	-1.39944	-0.716954	-0.145512	0.0734376					0.857199	0.71703	0.543987	0.468538	-0.501802	-0.316061	-0.153673	-0.0979649	-0.626636	-0.359215	-0.582148	-0.136512	1	1	1	1	1	1	0	1	2	2	1	1	0	1	0	1
LMAN1	Protein ERGIC-53	P49257	P49257	-1.74049	-0.0083743	1.24114	0.396811					0.90792	0.502675	0.173001	0.334845	-0.203501	-0.510949	0.0235175	-0.198925	0.682624	-0.63558	0.374662	-0.102995	1	1	5	2	1	2	2	2	1	2	3	2	1	1	0	3
LMAN2	Vesicular integral-membrane protein VIP36	D6RBV2;Q12907;D6RIU4;D6RDX1;D6RBH1	D6RBV2;Q12907;D6RIU4;D6RDX1	-0.826222	-1.24996	0.460278	0					0.735795	0.841538	0.363365	0.5	-0.88124	-0.879491	NaN	NaN	NaN	-0.879376	NaN	NaN	0	0	3	0	1	0	0	0	0	1	5	0	0	0	0	0
LMNA	Prelamin-A/C;Lamin-A/C	P02545;P02545-6;P02545-3;P02545-5;P02545-4;A0A0C4DGC5	P02545;P02545-6;P02545-3;P02545-5;P02545-4	-0.0360652	-0.222224	0.515247	0.478634					0.510977	0.57061	0.347819	0.303439	-0.503256	-0.581229	-0.528709	-0.700332	-0.462675	-0.25972	-0.50704	-0.606806	42	39	40	38	43	43	40	40	38	42	42	39	37	34	34	40
LMNA	Prelamin-A/C;Lamin-A/C	P02545-2;Q3BDU5;Q5TCI8;H0YAB0;REV__Q5VX52	P02545-2;Q3BDU5;Q5TCI8	1.01148	-0.975867	0.514948	1.18065					0.220119	0.7827	0.347903	0.102184	-0.565626	-0.629301	-0.358755	-0.827243	-0.568172	NaN	NaN	-0.490358	0	1	1	0	1	1	1	1	0	0	1	1	1	1	0	1
LMNB1	Lamin-B1	P20700;E9PBF6;A0A0D9SFE5;A0A0D9SFY5	P20700;E9PBF6;A0A0D9SFE5	-0.530158	-1.39321	0.710648	0.0728241					0.657088	0.867681	0.294743	0.4688	0.676396	0.797441	-0.57846	0.817884	0.778295	0.711997	-0.521311	1.00927	6	8	6	4	11	10	8	10	8	7	9	10	8	8	5	11
LMNB2	Lamin-B2	Q03252;J9JID7	Q03252;J9JID7	-0.346763	-0.747538	0.790062	1.32189					0.604338	0.725256	0.274294	0.0776522	0.503778	0.520519	-0.155877	0.156916	0.951083	0.977427	-0.166466	0.411872	8	6	10	6	5	8	7	6	7	9	5	10	2	4	5	4
LMO7	LIM domain only protein 7	Q8WWI1-3;F8WD26;J3KP06;Q8WWI1;Q8WWI1-4;Q8WWI1-2;E9PMP7	Q8WWI1-3;F8WD26;J3KP06;Q8WWI1;Q8WWI1-4;Q8WWI1-2;E9PMP7	-1.62641	-1.19539	0.902229	0.258988					0.892699	0.830743	0.246658	0.390347	-1.24423	-1.38862	-1.43237	-0.495512	NaN	-0.807489	-1.21802	-0.484296	1	0	7	3	3	3	2	2	3	1	7	4	1	2	2	4
LNPEP	Leucyl-cystinyl aminopeptidase;Leucyl-cystinyl aminopeptidase, pregnancy serum form	Q9UIQ6-3;Q9UIQ6-2;Q9UIQ6	Q9UIQ6-3;Q9UIQ6-2;Q9UIQ6	-1.38941	-1.03465	-0.0970906	0					0.855467	0.79628	0.529383	0.5	-0.649098	-0.161428	NaN	NaN	NaN	NaN	NaN	NaN	1	0	2	0	0	0	0	0	0	1	3	1	0	0	0	0
LONP1	Lon protease homolog, mitochondrial	K7EKE6;K7EJE8;P36776-2;P36776;P36776-3;K7ER27;K7ERR6;K7EQF8;K7ER56	K7EKE6;K7EJE8;P36776-2;P36776;P36776-3	0.482772	-0.106984	-0.0970906	0					0.356298	0.534131	0.529383	0.5	0.533885	0.206111	-0.355236	0.587854	0.21323	0.136795	NaN	NaN	2	2	7	2	0	0	0	0	0	1	3	4	0	0	0	1
LPP	Lipoma-preferred partner	A0A087WZF1;Q93052;C9JXK9;C9JUT4	A0A087WZF1;Q93052;C9JXK9;C9JUT4	0.99638	0.84118	1.94334	0.974523					0.223546	0.250313	0.0700346	0.147407	-0.988219	-1.06245	-0.739113	-0.134768	-1.16418	NaN	-0.276528	-0.252014	1	0	2	0	1	1	1	3	0	1	1	0	0	0	0	2
LRP1	Prolow-density lipoprotein receptor-related protein 1;Low-density lipoprotein receptor-related protein 1 85 kDa subunit;Low-density lipoprotein receptor-related protein 1 515 kDa subunit;Low-density lipoprotein receptor-related protein 1 intracellular domain	Q07954;H0YJI8;Q6PJ72	Q07954	0.115729	0.362801	0.293723	-0.246548					0.464817	0.385724	0.411761	0.604511	-1.41121	-1.07456	-2.46413	-1.08553	-1.53977	-1.66845	-0.424765	-1.01074	7	8	13	7	3	3	6	10	7	7	10	5	2	5	6	12
LRPPRC	Leucine-rich PPR motif-containing protein, mitochondrial	P42704;B8ZZ38;A0A0C4DG06;C9JCA9;H7C3W8;A0A0C4DG51;Q9NP80-3;Q9NP80-2;Q9NP80	P42704	-0.39655	-0.418355	-0.823857	-1.10447					0.618896	0.631173	0.734191	0.882448	0.125174	0.0163757	-0.00588827	-0.498536	-0.203548	-0.0851762	-0.0981583	NaN	4	5	25	22	2	0	0	1	3	7	20	21	1	2	1	1
LRRC40	Leucine-rich repeat-containing protein 40	Q9H9A6	Q9H9A6	-0.297519	0.91771	1.86132	-0.493266					0.589795	0.231237	0.07879	0.702036	0.0309589	0.00676755	-0.608421	-0.372991	NaN	NaN	-0.33249	NaN	0	0	2	0	1	1	0	0	0	0	0	0	1	0	0	1
LRRC47	Leucine-rich repeat-containing protein 47	Q8N1G4	Q8N1G4	-0.297519	-0.0236236	-0.0970906	0					0.589795	0.507545	0.529383	0.5	-0.358101	-0.34938	0.407413	-0.308652	NaN	-0.298191	NaN	NaN	0	0	3	4	0	0	0	0	0	0	4	3	0	0	0	1
LRRC59	Leucine-rich repeat-containing protein 59	Q96AG4;I3L223	Q96AG4	0.0826426	-0.0618886	0.273215	-0.104473					0.47486	0.51976	0.417831	0.544711	-0.290464	-0.506379	0.0794195	-0.516679	-0.49158	-0.548625	-0.176848	-0.425212	6	7	7	6	1	2	0	2	6	6	7	7	2	1	2	0
LSM12	Protein LSM12 homolog	Q3MHD2;Q3MHD2-2;K7ELG9	Q3MHD2;Q3MHD2-2;K7ELG9	0.978064	0.248536	0.496954	-1.32879					0.227744	0.421134	0.352966	0.923419	0.483507	0.5156	0.190787	0.0305292	0.429696	0.35101	-0.098993	0.254021	2	3	4	3	2	2	2	2	2	2	4	3	3	2	2	3
LSM2	U6 snRNA-associated Sm-like protein LSm2	Q9Y333	Q9Y333	-0.297519	-0.733967	0.929079	-0.104473					0.589795	0.72162	0.240272	0.544711	0.625069	0.51547	0.029447	0.179585	NaN	0.799711	0.182534	NaN	1	0	3	3	1	2	0	1	0	0	4	2	1	0	1	0
LSM6	U6 snRNA-associated Sm-like protein LSm6	P62312	P62312	0.508524	-0.548539	1.27321	0					0.349	0.66974	0.166841	0.5	0.575131	0.61917	-0.0113665	-0.00305361	0.449755	0.34868	0.261626	NaN	3	0	1	1	0	2	0	0	0	1	3	2	0	1	0	0
LTF	Lactotransferrin;Lactoferricin-H;Kaliocin-1;Lactoferroxin-A;Lactoferroxin-B;Lactoferroxin-C	P02788-2;E7EQB2;E7ER44;P02788;C9JCF5;CON__Q29443;CON__Q0IIK2	P02788-2;E7EQB2;E7ER44;P02788	-5.06286	2.45769	0.904271	1		+			0.999944	0.0245462	0.246169	0.141186	NaN	NaN	3.09371	NaN	NaN	4.91431	-3.50118	NaN	0	0	1	1	2	1	1	1	15	0	0	0	1	2	0	0
LUC7L2	Putative RNA-binding protein Luc7-like 2	Q9Y383-3;A0A0A6YYC3;Q9Y383-2;Q9Y383;Q96HJ9-2;A0A0A6YYJ8	Q9Y383-3;A0A0A6YYC3;Q9Y383-2;Q9Y383;Q96HJ9-2;A0A0A6YYJ8	1.85562	1.60325	0.399458	0.566704					0.0784022	0.0996297	0.380831	0.271193	0.218821	0.185844	-0.134719	0.550146	2.25846	-0.352246	0.144898	NaN	0	2	2	2	2	4	1	1	0	0	0	0	2	1	1	0
LYZ	Lysozyme C	P61626;F8VV32;A0A0B4J259	P61626;F8VV32;A0A0B4J259	-2.8864	-0.415305	0.85122	0.0734376					0.986182	0.630252	0.259038	0.468538	2.18954	3.53257	2.17528	4.57608	NaN	NaN	-1.87967	NaN	0	0	1	0	2	1	0	1	3	0	0	1	1	0	0	1
MACF1	Microtubule-actin cross-linking factor 1, isoforms 1/2/3/5	H3BPE1;H3BQK9;Q9UPN3;Q9UPN3-3;Q9UPN3-2;Q9UPN3-4;Q9UPN3-5;H0Y390;E9PNZ4;E9PLY0;H0Y314;H0Y4F5;H0Y6T5;H0YD69;E9PS75;H0YBX0;H0Y7I1;O15169-2;O15169	H3BPE1;H3BQK9;Q9UPN3;Q9UPN3-3;Q9UPN3-2;Q9UPN3-4;Q9UPN3-5;H0Y390	-0.297519	0.198962	-0.0970906	0					0.589795	0.436715	0.529383	0.5	-0.840539	-0.713006	-0.113521	-0.117067	NaN	-0.679225	NaN	NaN	0	0	4	0	0	0	0	0	1	0	2	1	0	0	0	0
MAGOHB	Protein mago nashi homolog 2	Q96A72;F5H6N1;F5H124	Q96A72;F5H6N1	-0.0388875	-0.100364	0.394052	0.321893					0.511836	0.532024	0.382396	0.364657	0.810475	0.663707	0.0503676	0.460704	0.869753	0.603415	0.0522718	0.376627	7	8	7	7	8	8	7	7	5	8	6	7	8	9	6	5
MAGT1	Magnesium transporter protein 1	Q9H0U3;A0A087WU53;Q9H0U3-2	Q9H0U3;A0A087WU53	0.280273	0.695583	0.242506	0.0734376					0.415329	0.288788	0.426956	0.468538	-0.643378	-0.761392	-0.408728	-0.31705	NaN	NaN	-0.272494	NaN	0	1	1	1	1	2	0	1	0	0	1	0	1	2	1	1
MAP1A	Microtubule-associated protein 1A;MAP1A heavy chain;MAP1 light chain LC2	P78559;P78559-2;E9PGC8	P78559;P78559-2;E9PGC8	1.51277	0.1662	0.514948	0.369336					0.124189	0.447069	0.347903	0.34567	-1.44286	-1.47443	NaN	-1.32489	-2.03479	-1.47858	NaN	-0.96604	5	1	6	3	0	1	1	4	1	1	6	2	0	0	0	3
MAP1B	Microtubule-associated protein 1B;MAP1B heavy chain;MAP1 light chain LC1	P46821;D6RA32;D6RA40;D6RGJ3;D6RCL2	P46821	-0.181602	-0.362034	1.02033	0.220474					0.555105	0.614041	0.219254	0.406324	-0.554026	-0.372412	-0.0330956	-0.345031	-0.75528	-0.376527	-0.186491	-0.175759	11	11	18	15	6	10	10	11	7	12	18	13	5	5	10	12
MAP1LC3B;MAP1LC3B2;MAP1LC3A	Microtubule-associated proteins 1A/1B light chain 3B;Microtubule-associated proteins 1A/1B light chain 3 beta 2;Microtubule-associated proteins 1A/1B light chain 3A	H3BTL1;Q9GZQ8;A6NCE7;Q9H492;Q9H492-2	H3BTL1;Q9GZQ8;A6NCE7;Q9H492;Q9H492-2	-0.826222	0.640004	-0.0970906	-0.314294					0.735795	0.304175	0.529383	0.632269	-1.04527	-0.841615	-0.588623	-0.271393	NaN	-0.559315	NaN	0.0927221	1	0	1	1	0	0	1	1	0	1	1	1	0	0	0	1
MAP4	Microtubule-associated protein;Microtubule-associated protein 4	E7EVA0;P27816;P27816-6;P27816-2;P27816-5;P27816-4;B5MEG9;H7C4C5;H0Y2V1;F8W9U4;H7C456;P27816-7	E7EVA0;P27816;P27816-6;P27816-2;P27816-5;P27816-4	0.392492	-0.26436	0.845643	0.462099					0.382285	0.583815	0.260411	0.309679	-0.459733	-0.253619	-0.26661	-0.295959	-0.705415	-0.399674	-0.331688	-0.133898	18	19	23	19	8	12	7	13	15	17	22	17	6	6	8	13
MAP4K4	Mitogen-activated protein kinase kinase kinase kinase 4	E7EN19;E7ESS2	E7EN19;E7ESS2	6.24141	5.07132	5.165	4.44074	+	+	+	+	9.56e-07	2.45e-05	4.4e-05	9.04e-07	-0.310055	-0.262854	0.387343	-0.165781	-0.201859	-0.305644	0.417614	-0.118792	20	21	16	18	7	4	8	3	1	1	1	1	0	0	0	0
MAPK1	Mitogen-activated protein kinase 1	P28482;P28482-2;H0YDH9;K7ELV1;K7EN18;P31152;Q16659	P28482;P28482-2	2.50061	0.411516	0.318855	0.647125	+				0.0281922	0.370894	0.404352	0.24332	-0.447007	-0.145287	-0.367928	-0.156011	-0.210447	0.0137288	NaN	0.130139	2	3	8	4	1	1	1	2	1	0	6	2	0	1	1	2
MAPRE1	Microtubule-associated protein RP/EB family member 1	Q15691	Q15691	1.47268	0.453989	1.27262	0.219886					0.130568	0.358118	0.166954	0.406569	-0.0100408	0.0460196	0.0933901	0.254694	-0.187091	-0.0322811	0.221917	0.435936	1	5	4	5	4	2	2	4	0	1	4	4	3	0	3	4
MARS	Methionine--tRNA ligase, cytoplasmic	P56192;P56192-2;H0YHV5;F5H2V6;H0YIP0;F8VS26;F8W0M7;F8W0S4;F8VZZ9;H0YIC2;F8VPL7;H0YHL6;H0YI94;H0YI27	P56192;P56192-2	-0.871616	-0.735881	0.107028	0.515026					0.746998	0.722135	0.467616	0.289907	0.147108	0.154857	0.156674	-0.018093	-0.00553823	0.194999	0.172705	-0.0609725	4	9	14	14	13	16	16	13	9	15	20	16	11	14	12	12
MAT2A	S-adenosylmethionine synthase isoform type-2	P31153-2;P31153;Q00266	P31153-2;P31153	-0.16665	-0.311933	-0.251335	-0.687811					0.550593	0.598611	0.575672	0.770168	0.55376	0.37584	0.151709	0.309906	0.611549	0.420478	0.317603	0.356457	4	3	5	5	3	1	1	3	2	5	5	4	3	3	1	3
MAT2B	Methionine adenosyltransferase 2 subunit beta	Q9NZL9-4;Q9NZL9-2;Q9NZL9;Q9NZL9-3;Q9NZL9-5;E5RJR3;H7C0X7	Q9NZL9-4;Q9NZL9-2;Q9NZL9;Q9NZL9-3	0.294579	0.364333	-0.0709213	0.109726					0.411077	0.385255	0.521472	0.453051	0.221455	0.209056	0.333395	NaN	NaN	0.137762	NaN	NaN	1	0	2	1	0	1	1	1	0	0	1	1	1	0	0	1
MATR3	Matrin-3	P43243;A8MXP9;D6REM6;D6R991;H0Y8T4;B3KM87;P43243-2;D6R8Z5;Q68E03;D6RCM3;D6REK4;D6RBI2;D6RBK5;D6RE02;D6RIA2;D6RB45;D6R9F3;D6RAM9;D6RAY2;D6RBS2	P43243;A8MXP9;D6REM6;D6R991	0.0875202	-0.82605	0.214755	-0.139443					0.473378	0.745819	0.435236	0.559579	0.603961	0.515484	-0.0202694	0.233702	0.39906	0.507607	-0.0217018	0.13747	12	16	10	9	13	13	6	5	14	14	11	12	12	12	2	10
MBNL1	Muscleblind-like protein 1	C9JP00;Q9NR56;A0A0A0MQX8;Q9NR56-3;Q9NR56-4;Q9NR56-7;Q9NR56-6;Q9NR56-2;Q9NR56-5;H7C4T5;O95205;Q86VM6;Q5VZF2-3;Q5VZF2-2;Q5VZF2;Q9NUK0-2;B1AKI6;Q9NUK0;C9J4T8;C9JCX1;H7C4Y1;Q9NUK0-4;Q9NUK0-3	C9JP00;Q9NR56;A0A0A0MQX8;Q9NR56-3;Q9NR56-4;Q9NR56-7;Q9NR56-6;Q9NR56-2;Q9NR56-5;H7C4T5	1.01148	-0.105175	-0.486412	0					0.220119	0.533555	0.644056	0.5	0.168537	0.22603	-0.186105	0.376564	NaN	0.538975	-0.124901	NaN	0	1	3	4	2	2	1	1	0	0	3	2	2	1	0	0
MBP	Myelin basic protein	E9PJ72;J3QL64;P02686-6;P02686-5;A8MZH3;P02686-4;P02686-3;H7BYR8;P02686;E9PMR5;C9J6H1;H0YF02;H0YEA2;J3QKL5;J3QQK6;J3KT34;F5H7N4;F8WEU6;E9PNZ1;E9PKX9;J3KT01;P02686-2	E9PJ72;J3QL64;P02686-6;P02686-5;A8MZH3;P02686-4;P02686-3;H7BYR8;P02686;E9PMR5;C9J6H1;H0YF02;H0YEA2;J3QKL5;J3QQK6	-0.297519	-0.359996	-1.9025	-1.98618					0.589795	0.613417	0.925705	0.983626	NaN	NaN	NaN	NaN	NaN	NaN	NaN	NaN	0	0	0	0	0	0	0	0	0	0	0	0	0	3	2	0
MCM2	DNA replication licensing factor MCM2	P49736;H0Y8E6	P49736;H0Y8E6	5.58443	1.98849	1.86343	0.921771	+				1.02e-05	0.0556789	0.078554	0.160865	1.83453	1.53046	-0.617908	1.70995	1.4949	1.51064	-0.558852	1.655	15	19	18	15	11	7	4	6	0	1	9	6	3	3	4	4
MCM3	DNA replication licensing factor MCM3	P25205;P25205-2;J3KQ69;Q7Z6P5	P25205;P25205-2;J3KQ69	1.77948	0.997419	-0.0640987	1.3276					0.0872631	0.212261	0.519408	0.0767637	1.76995	1.5168	-0.540233	1.68443	1.66833	1.61856	-0.528863	1.66963	15	19	23	19	24	22	14	11	4	7	18	13	19	22	7	6
MCM4	DNA replication licensing factor MCM4	P33991;E5RG31;E5RFJ8;E5RFR3;E5RG53	P33991	5.13789	2.49697	0.720484	1.83674	+	+		+	4.42e-05	0.0227913	0.292173	0.0241624	1.78687	1.61648	-0.571978	1.44486	1.54018	1.54647	-0.579243	1.83664	18	21	20	17	12	15	12	12	1	2	6	7	12	11	4	7
MCM5	DNA replication licensing factor MCM5	P33992;B1AHB1;B1AHB2;B1AHA9	P33992;B1AHB1	2.78108	1.30424	0.067821	0.76098	+				0.0169163	0.148182	0.479466	0.206662	1.68779	1.56398	-0.635234	2.09612	1.60112	1.56024	-0.62955	2.29566	7	9	12	11	25	26	9	5	1	2	4	4	24	23	6	7
MCM6	DNA replication licensing factor MCM6	Q14566	Q14566	7.76937	3.70064	1.38312	2.03445	+	+		+	1.53e-09	0.00152341	0.14682	0.0143696	1.2051	1.3877	-0.573724	1.59263	1.72275	1.61972	-0.57733	1.90719	27	28	29	31	27	26	19	20	0	1	5	9	14	12	8	8
MCM7	DNA replication licensing factor MCM7	P33993;P33993-3;P33993-2;C9J8M6	P33993;P33993-3	4.20474	2.81402	2.08857	2.3113	+	+		+	0.000667464	0.0121268	0.0563918	0.00648369	1.7408	1.56737	-0.559701	1.84968	1.66555	1.62255	-0.586813	2.07118	28	34	24	29	30	28	21	21	0	11	16	17	13	16	6	10
MCPH1	Microcephalin	Q8NEM0-2;Q8NEM0-3;Q8NEM0;A0A075B6F8	Q8NEM0-2;Q8NEM0-3;Q8NEM0;A0A075B6F8	0.280273	1.39456	0.460278	0					0.415329	0.132088	0.363365	0.5	NaN	NaN	NaN	NaN	NaN	1.45229	NaN	NaN	0	1	3	0	1	0	0	0	0	0	0	0	0	0	0	0
MCTS1	Malignant T-cell-amplified sequence 1	Q9ULC4-2;Q9ULC4;Q9ULC4-3	Q9ULC4-2;Q9ULC4;Q9ULC4-3	1.49752	1.07619	2.53363	0.908347			+		0.12659	0.194435	0.0271942	0.164414	-0.169864	-0.170452	0.0871265	-0.175055	0.0220462	0.0620549	0.443622	-0.194209	2	3	4	4	2	4	2	3	3	2	2	4	1	1	2	2
MDH1	Malate dehydrogenase, cytoplasmic	P40925;P40925-3;B9A041;P40925-2;B8ZZ51;C9JF79;C9JRL4;C9JLV6	P40925;P40925-3;B9A041;P40925-2;B8ZZ51	-0.297519	0.84118	-0.0970906	0.795628					0.589795	0.250313	0.529383	0.196191	NaN	0.140768	0.054704	0.571118	NaN	-0.0830355	NaN	NaN	0	0	2	0	0	0	1	2	0	0	1	0	0	0	0	1
MDH2	Malate dehydrogenase, mitochondrial;Malate dehydrogenase	P40926;P40926-2;G3XAL0	P40926;P40926-2;G3XAL0	0.303457	0.194833	1.26401	0.0039597					0.408445	0.438018	0.168595	0.498302	0.0228612	-0.220499	0.0442055	-0.326957	-0.078671	-0.247522	0.11484	-0.486589	8	8	12	8	4	3	3	5	8	7	13	9	2	2	4	5
MED15	Mediator of RNA polymerase II transcription subunit 15	Q96RN5-3;G3V1P5;Q96RN5-2;Q96RN5;C9JM58;C9JLN7;C9JZV5;C9JGN2;C9J1I1	Q96RN5-3;G3V1P5;Q96RN5-2;Q96RN5	-1.71549	-3.12661	-0.0970906	0					0.90473	0.993849	0.529383	0.5	NaN	NaN	NaN	NaN	NaN	NaN	NaN	NaN	0	0	0	0	0	0	0	0	2	0	3	1	0	0	0	0
MEMO1	Protein MEMO1	Q9Y316-2;Q9Y316;Q9Y316-3	Q9Y316-2;Q9Y316;Q9Y316-3	1.48345	0.358473	0.699865	0.158568					0.128833	0.38705	0.297574	0.432324	-0.659088	-0.574836	0.0275922	-0.296774	-0.530245	-0.432224	0.0329999	-0.275606	2	2	4	3	1	1	1	1	0	2	2	2	1	1	1	2
MEPCE	7SK snRNA methylphosphate capping enzyme	Q7L2J0;Q7L2J0-2	Q7L2J0	-0.826222	-3.12661	-0.345632	0					0.735795	0.993849	0.603505	0.5	NaN	NaN	NaN	NaN	NaN	NaN	0.737981	NaN	0	0	0	0	1	1	0	0	0	1	2	1	2	1	0	0
METAP1	Methionine aminopeptidase 1	H0Y955;P53582;H0Y903	H0Y955;P53582	-0.297519	1.04987	-0.0970906	0					0.589795	0.200288	0.529383	0.5	0.200196	0.167093	NaN	NaN	NaN	-0.0518216	NaN	NaN	0	0	1	1	0	0	0	0	0	0	1	0	0	0	0	0
METTL16	Methyltransferase-like protein 16	Q86W50;I3L362;Q86W50-2;I3L3W3;I3L4V1;K7EKQ8	Q86W50;I3L362;Q86W50-2;I3L3W3;I3L4V1	5.12925	4.59186	5.32344	4.15167	+	+	+	+	4.54e-05	0.000118209	2.65e-05	4.04e-06	NaN	NaN	NaN	NaN	0.452966	0.506121	-0.0251383	0.494247	7	6	6	5	8	7	2	4	0	0	0	0	0	0	0	0
MFGE8	Lactadherin;Lactadherin short form;Medin	Q08431-2;F5GZN3;Q08431;X6R3G6;Q08431-3;H0YKS8;A0A087WUV5	Q08431-2;F5GZN3;Q08431;X6R3G6;Q08431-3;H0YKS8	0.641163	1.03338	-0.0970906	0.0734376					0.312339	0.204006	0.529383	0.468538	-2.73698	-2.3598	NaN	-1.01082	NaN	-2.48765	NaN	NaN	1	1	3	3	0	0	0	1	1	0	1	2	0	0	0	1
MGLL	Monoglyceride lipase	Q99685;A0A0C4DFN3;H7C4E0;E7EWX8;Q99685-2;H7C599;C9JAM4;H7C5K5	Q99685;A0A0C4DFN3;H7C4E0;E7EWX8;Q99685-2;H7C599	-0.512139	0.537274	1.65047	0					0.65202	0.333534	0.105072	0.5	-0.614053	-0.383275	0.976387	NaN	-0.590719	-0.379016	0.877384	NaN	3	2	2	2	1	0	0	0	2	3	2	1	1	1	0	0
MGST1	Microsomal glutathione S-transferase 1	P10620;F5H7F6;F5H6X2;P10620-2;F5GX73;F5H613;F5H760	P10620;F5H7F6;F5H6X2;P10620-2	-0.0321295	0.299609	0.162469	-0.150366					0.509779	0.405209	0.450911	0.564207	-1.18454	-1.19527	0.472057	-1.38608	-1.28872	-1.21231	0.377183	-1.16023	3	3	3	3	3	4	4	4	2	3	3	3	4	3	4	4
MGST3	Microsomal glutathione S-transferase 3	O14880;Q5VV89;Q5VV87	O14880;Q5VV89	-0.145235	0.774354	0.239784	-0.506939					0.54412	0.267629	0.427767	0.70711	-1.22226	-0.957069	-0.474159	-0.485189	-1.22361	-1.01343	-0.261643	-0.376118	3	4	3	3	1	1	2	2	3	4	2	2	2	1	2	3
MIF	Macrophage migration inhibitory factor	P14174	P14174	-0.177814	0.569965	-0.135768	0.0330553					0.553962	0.324069	0.541053	0.485827	0.546304	0.199918	-0.267083	0.851835	0.594949	0.442336	-0.168131	0.902797	2	2	2	2	2	2	2	2	2	2	2	2	2	2	2	2
MKI67	Antigen KI-67	A0A087WV66;P46013;P46013-2	A0A087WV66;P46013;P46013-2	-0.297519	-0.359996	2.20834	1.76794			+	+	0.589795	0.613417	0.0467959	0.0286806	2.54215	1.92554	0.307953	1.23116	NaN	NaN	0.302719	NaN	0	0	0	0	2	3	0	2	0	0	0	0	0	0	0	0
MLEC	Malectin	Q14165;F5H1S8;H0YG07;F5GX14	Q14165;F5H1S8;H0YG07	0.92522	-0.320519	0.514948	1.32882					0.240102	0.601267	0.347903	0.0765751	-0.816	-0.945466	-0.306089	-0.475025	-0.52044	-0.780143	0.507689	-0.451725	0	3	4	2	2	5	2	2	0	2	3	1	2	3	1	0
MLTK	Mitogen-activated protein kinase kinase kinase MLT	Q9NYL2-2;Q9NYL2;Q9NYL2-3;C9J3F7	Q9NYL2-2;Q9NYL2;Q9NYL2-3	-1.05868	-0.349343	0.00204088	-0.24424					0.790401	0.610149	0.499382	0.603555	0.0459514	-0.342497	-0.490797	-0.0468929	0.0447077	-0.508931	-0.133174	0.0337314	2	2	6	5	6	6	7	8	3	4	8	6	5	6	5	8
MMP1	Interstitial collagenase;22 kDa interstitial collagenase;27 kDa interstitial collagenase	P03956	P03956	-0.297519	-0.359996	-1.54108	0					0.589795	0.613417	0.879022	0.5	NaN	NaN	NaN	NaN	NaN	NaN	NaN	NaN	0	0	0	0	1	0	0	0	0	0	0	0	2	1	0	0
MMP14	Matrix metalloproteinase-14	P50281	P50281	-1.51655	-0.489845	-0.0970906	0.566704					0.8764	0.652545	0.529383	0.271193	NaN	-0.0868046	NaN	NaN	NaN	NaN	NaN	NaN	0	0	1	1	0	0	0	1	0	2	2	0	0	0	0	0
MMS19	MMS19 nucleotide excision repair protein homolog	Q96T76;Q96T76-8;Q96T76-9;Q96T76-5;Q5T454;Q96T76-7;H7C1W5;B0QZ77;H0Y746;H0Y7V3;H7C0A9;F8WCH8	Q96T76;Q96T76-8;Q96T76-9;Q96T76-5;Q5T454;Q96T76-7	-0.663434	1.48459	-0.0970906	0					0.69365	0.117286	0.529383	0.5	0.0937587	0.114688	-0.124742	-0.083894	0.18251	0.085627	NaN	NaN	1	2	2	3	0	0	0	0	1	1	3	3	0	0	0	0
MOB1A;MOB1B	MOB kinase activator 1A;MOB kinase activator 1B	Q9H8S9;Q7L9L4;Q7L9L4-2;Q9H8S9-2;D6RCK3	Q9H8S9;Q7L9L4;Q7L9L4-2;Q9H8S9-2;D6RCK3	1.15996	1.35718	1.42174	0.874529					0.188054	0.138597	0.140184	0.173577	0.128431	0.121235	-0.31923	0.48247	0.357573	0.124345	0.299589	1.41241	3	3	1	1	2	1	2	1	2	1	2	0	1	0	0	1
MOGS	Mannosyl-oligosaccharide glucosidase	Q13724;Q13724-2;C9J8D4;C9JDQ1;B8ZZE2	Q13724;Q13724-2;C9J8D4	-0.79742	-0.33627	-0.0791493	0.608333					0.728559	0.606127	0.523961	0.256568	-0.772453	-0.723543	0.2252	-0.428445	-0.943995	-0.751553	-0.348582	-0.430248	3	2	4	3	1	3	3	6	5	5	6	4	1	5	4	5
MON2	Protein MON2 homolog	Q7Z3U7-2;Q7Z3U7-6;Q7Z3U7-5;Q7Z3U7;F8VZV1;Q7Z3U7-3	Q7Z3U7-2;Q7Z3U7-6;Q7Z3U7-5;Q7Z3U7;F8VZV1	-3.21851	-3.24802	-1.68114	-1					0.992972	0.995347	0.899103	0.858814	-0.914243	-0.44119	NaN	NaN	NaN	NaN	NaN	NaN	0	0	1	1	0	0	0	0	4	1	5	5	1	2	1	1
MORC3	MORC family CW-type zinc finger protein 3	Q14149	Q14149	6.15752	6.25555	4.4013	1	+	+	+		1.31e-06	2.74e-07	0.000416169	0.141186	NaN	NaN	NaN	NaN	0.397255	0.672338	-0.0279851	0.601155	14	16	12	18	6	5	2	1	0	0	0	1	0	0	0	0
MOV10	Putative helicase MOV-10	Q5JR04;Q9HCE1;Q9HCE1-2	Q5JR04;Q9HCE1;Q9HCE1-2	-1.82622	-2.31236	-1.90406	-1.05629					0.918261	0.967946	0.925871	0.87192	0.114581	0.0805247	-0.109588	-0.0239187	-1.03762	NaN	-0.0169589	-0.12341	2	1	0	0	5	8	5	2	1	1	2	1	7	10	8	4
MPG	DNA-3-methyladenine glycosylase	A2IDA3;P29372-5;P29372-4;P29372-2;P29372	A2IDA3;P29372-5;P29372-4;P29372-2;P29372	-0.826222	-0.359996	-0.147691	0					0.735795	0.613417	0.544643	0.5	NaN	-1.453	0.508085	-0.243457	NaN	NaN	0.603634	NaN	0	0	0	0	3	1	0	0	0	1	0	0	2	2	1	0
MPRIP	Myosin phosphatase Rho-interacting protein	Q6WCQ1;Q6WCQ1-2;Q6WCQ1-3;J3KSW8;J3KSK7	Q6WCQ1;Q6WCQ1-2;Q6WCQ1-3;J3KSW8	1.03723	-0.516767	6.23097	4.10485			+	+	0.214343	0.660474	1.12e-06	5.1e-06	-0.684491	-0.683319	-0.954543	0.318048	NaN	-0.54839	-0.888033	0.186206	2	0	7	2	14	18	12	13	0	1	6	3	0	0	1	3
MRE11A	Double-strand break repair protein MRE11A	P49959-2;F8W7U8;P49959;P49959-3;F5GXT0;F5H742;F5H256	P49959-2;F8W7U8;P49959;P49959-3	-0.297519	0.91771	0.876223	1.97253				+	0.589795	0.231237	0.25293	0.016983	-0.392256	0.65663	-0.0217061	0.450577	0.59403	-0.0459047	-0.199312	0.404809	1	1	5	3	4	2	1	3	0	0	1	1	1	1	1	0
MRPL13	39S ribosomal protein L13, mitochondrial	Q9BYD1;E5RJI7;H0YAX3;E5RFI2	Q9BYD1;E5RJI7	-0.297519	1.1667	-0.681145	0.0734376					0.589795	0.175117	0.697484	0.468538	NaN	-0.340072	NaN	NaN	NaN	-0.221937	NaN	NaN	0	0	5	5	0	0	0	1	0	0	1	3	0	1	0	1
MRPL16	39S ribosomal protein L16, mitochondrial	Q9NX20;E9PI14	Q9NX20;E9PI14	-0.297519	-2.36691	-0.0970906	0					0.589795	0.970961	0.529383	0.5	NaN	0.230988	NaN	NaN	NaN	-0.0302771	NaN	NaN	0	0	0	1	0	0	0	0	0	0	1	2	0	0	0	0
MRPL19	39S ribosomal protein L19, mitochondrial	P49406;A0A0A0MRF4;S4R3W9;S4R455	P49406;A0A0A0MRF4;S4R3W9	-0.403721	-0.0586661	-0.0970906	-0.493266					0.620979	0.518732	0.529383	0.702036	0.28373	0.0339575	NaN	NaN	NaN	-0.349492	NaN	NaN	1	1	5	2	0	0	0	1	0	1	6	4	0	0	0	1
MRPL20	39S ribosomal protein L20, mitochondrial	Q9BYC9;I3L2X1;Q9BYC9-2	Q9BYC9;I3L2X1;Q9BYC9-2	-0.297519	1.12247	-0.0970906	0					0.589795	0.1844	0.529383	0.5	NaN	-0.0826333	NaN	NaN	NaN	-0.171296	NaN	NaN	0	0	2	3	0	0	0	0	0	0	1	0	0	0	0	0
MRPL21	39S ribosomal protein L21, mitochondrial	Q7Z2W9;Q7Z2W9-2;H3BUY0;F5H7V8	Q7Z2W9;Q7Z2W9-2;H3BUY0	0.280273	1.02818	0.318855	0.136461					0.415329	0.205189	0.404352	0.441686	-0.532707	0.91072	NaN	NaN	NaN	-0.420156	NaN	-0.228609	0	1	5	5	1	1	0	1	0	0	1	4	0	1	0	2
MRPL23	39S ribosomal protein L23, mitochondrial	Q16540;A6NJD9;A8MVT4;A8MYK1;H7C2P7	Q16540;A6NJD9;A8MVT4;A8MYK1;H7C2P7	-0.936628	1.7894	-0.0970906	-1.29347					0.762597	0.0759699	0.529383	0.91781	-0.328921	-0.153196	NaN	-1.2375	NaN	-0.298642	NaN	NaN	0	0	4	3	0	0	1	1	1	1	2	2	0	0	1	2
MRPL27	39S ribosomal protein L27, mitochondrial	D6RAN8;H7C5U8;Q9P0M9	D6RAN8;H7C5U8;Q9P0M9	-0.358837	0.947341	1.31886	0.0734376					0.607883	0.224075	0.158322	0.468538	NaN	-0.125232	-0.106135	-0.285607	NaN	-0.0926638	-0.0662512	NaN	0	1	2	1	2	2	1	1	1	1	1	1	0	1	0	1
MRPL3	39S ribosomal protein L3, mitochondrial	P09001;H0Y9G6;E7ETU7;D6RC14;E9PF06	P09001;H0Y9G6;E7ETU7;D6RC14;E9PF06	-0.297519	-0.118745	-1.09709	-1.60319					0.589795	0.537872	0.797577	0.957595	NaN	0.135609	NaN	NaN	NaN	-0.195022	NaN	NaN	0	0	1	1	0	0	0	0	0	0	2	1	1	1	0	1
MRPL34	39S ribosomal protein L34, mitochondrial;Ribosomal protein L34	Q9BQ48;M0R093;M0R226	Q9BQ48;M0R093;M0R226	2.01148	0.91771	-0.0970906	0					0.0624132	0.231237	0.529383	0.5	0.361743	-0.398186	0.346035	NaN	0.788322	0.708857	NaN	NaN	1	1	2	0	0	0	0	0	0	0	0	0	0	0	0	0
MRPL37	39S ribosomal protein L37, mitochondrial	Q9BZE1;S4R369;H0Y4J2	Q9BZE1;S4R369	-0.826222	1.08663	-0.0691062	-0.493266					0.735795	0.192144	0.520923	0.702036	0.0434327	-0.2237	NaN	NaN	NaN	-0.3013	-0.0545104	NaN	0	0	3	2	1	2	0	0	0	1	2	2	1	2	0	1
MRPL38	39S ribosomal protein L38, mitochondrial	Q96DV4;Q96DV4-2	Q96DV4;Q96DV4-2	0.280273	1.21801	-0.0970906	0					0.415329	0.164727	0.529383	0.5	-0.344143	-0.207114	NaN	NaN	NaN	-0.412035	NaN	NaN	0	1	5	3	0	0	0	0	0	0	2	1	0	0	0	0
MRPL4	39S ribosomal protein L4, mitochondrial	K7ES61;Q9BYD3;K7EKI4;K7ELF1;K7ELQ0;Q9BYD3-2;X6RAY8	K7ES61;Q9BYD3;K7EKI4;K7ELF1;K7ELQ0;Q9BYD3-2;X6RAY8	-0.297519	1.17575	-0.0970906	0					0.589795	0.173255	0.529383	0.5	0.207932	-0.352459	-0.143058	NaN	NaN	0.0916635	1.81589	NaN	0	0	2	1	1	1	0	0	0	0	1	1	0	0	0	0
MRPL45	39S ribosomal protein L45, mitochondrial	A0A087WU62;Q9BRJ2;A0A087X2D5	A0A087WU62;Q9BRJ2;A0A087X2D5	0.280273	1.67159	-0.0970906	0					0.415329	0.0903857	0.529383	0.5	NaN	0.0253082	NaN	NaN	NaN	0.00847472	NaN	NaN	0	1	1	2	0	0	0	0	0	0	2	2	0	0	0	0
MRPL47	39S ribosomal protein L47, mitochondrial	Q9HD33-2;Q9HD33;Q9HD33-3	Q9HD33-2;Q9HD33;Q9HD33-3	1.71317	0.570247	-0.0970906	0					0.0955708	0.323988	0.529383	0.5	-0.062365	-0.128246	NaN	NaN	NaN	NaN	NaN	NaN	1	1	2	1	0	0	0	0	0	0	0	1	0	0	0	0
MRPS10	28S ribosomal protein S10, mitochondrial	P82664	P82664	-0.297519	1.33147	-0.0970906	0					0.589795	0.143198	0.529383	0.5	NaN	-0.0717275	NaN	NaN	NaN	-0.197251	NaN	NaN	0	0	2	2	0	0	0	0	0	0	0	1	0	0	0	0
MRPS24	28S ribosomal protein S24, mitochondrial	Q96EL2	Q96EL2	-1.70542	-1.09159	-0.681145	-1.60319					0.903421	0.808941	0.697484	0.957595	0.254035	-0.0761892	NaN	NaN	NaN	-0.172918	NaN	NaN	1	1	2	1	0	0	1	0	1	1	1	1	0	1	0	1
MRPS25	28S ribosomal protein S25, mitochondrial	P82663;E7EPW2;P82663-3;P82663-2	P82663;E7EPW2;P82663-3;P82663-2	-0.297519	1.60325	-0.0970906	0					0.589795	0.0996297	0.529383	0.5	NaN	0.186777	NaN	0.314376	NaN	0.108769	NaN	NaN	0	0	3	1	0	0	0	0	0	0	0	0	0	0	0	0
MRPS31	28S ribosomal protein S31, mitochondrial	Q92665	Q92665	-0.297519	1.19896	-0.0970906	0					0.589795	0.168536	0.529383	0.5	0.00258693	-0.0128308	NaN	NaN	NaN	-0.0316145	NaN	NaN	0	0	1	0	0	0	0	0	0	0	1	0	0	0	0	0
MRPS34	28S ribosomal protein S34, mitochondrial	P82930;C9JJ19;A0A087WUZ8	P82930;C9JJ19;A0A087WUZ8	0.280273	-0.0526585	-0.0970906	0					0.415329	0.516815	0.529383	0.5	0.0981497	0.00981493	0.559669	-0.56608	NaN	-0.13258	NaN	NaN	0	1	3	1	0	0	0	0	0	0	2	1	0	0	0	0
MRTO4	mRNA turnover protein 4 homolog	Q9UKD2	Q9UKD2	0.280273	0.91771	1.31704	0.602993					0.415329	0.231237	0.158655	0.258421	0.682369	0.854958	0.0934711	0.200228	NaN	NaN	0.0397635	NaN	0	1	2	0	3	2	1	1	0	0	0	1	2	4	1	1
MSH2	DNA mismatch repair protein Msh2	P43246;V9H019;P43246-2;E9PHA6;A0A087X1E7;A0A087X078;V9H0B2;V9H015	P43246;V9H019;P43246-2;E9PHA6;A0A087X1E7;A0A087X078	-1.51655	2.24896	-0.123777	0.931816		+			0.8764	0.0358778	0.537438	0.158243	1.31914	1.09612	-0.177493	0.802364	NaN	0.98374	NaN	NaN	0	0	2	2	1	0	2	1	0	1	2	0	0	1	1	0
MSH6	DNA mismatch repair protein Msh6	P52701;A0A087WWJ1;P52701-2;P52701-4;P52701-3;C9JH55;C9J8Y8;C9J7Y7;U3KQ72;F8WAX8;A0A087WYT6	P52701;A0A087WWJ1;P52701-2;P52701-4;P52701-3	0.0633715	0.382574	0.318855	0.615509					0.480717	0.379683	0.404352	0.254089	1.48054	1.31033	-0.166065	0.823257	1.52713	1.469	-0.490409	-1.4558	1	1	2	4	2	1	0	1	1	1	1	1	0	1	0	2
MSN	Moesin	P26038;V9GZ54	P26038	-0.37223	-0.174709	-0.279724	-0.168508					0.611804	0.555624	0.584098	0.571874	-0.44879	-0.385225	-0.519856	0.013808	-0.519306	-0.338763	-0.542023	0.0615892	34	33	37	34	29	25	27	33	34	33	39	33	30	31	32	35
MTA2	Metastasis-associated protein MTA2	O94776;O94776-2;E9PCS8	O94776;O94776-2	1.70248	1.12247	0.460278	-1.47359					0.096963	0.1844	0.363365	0.943416	1.06137	0.909791	0.110223	0.337692	1.19326	0.979829	-0.0446506	NaN	1	1	1	4	4	1	1	0	1	1	1	1	2	2	1	0
MTAP	S-methyl-5-thioadenosine phosphorylase;Purine nucleoside phosphorylase	Q13126-4;Q13126;Q13126-3;Q13126-2;B4DUC8;Q13126-7;J3QSB7;Q13126-6;Q13126-5;F2Z2F3;F8WES2;J3KRN1	Q13126-4;Q13126;Q13126-3;Q13126-2;B4DUC8;Q13126-7;J3QSB7;Q13126-6;Q13126-5;F2Z2F3	0.596279	-0.0188412	0.514948	0					0.324561	0.506018	0.347903	0.5	0.582712	0.335736	0.355812	0.505327	0.507856	0.479428	NaN	NaN	2	4	3	4	1	1	0	1	2	2	2	4	1	0	0	0
MTCH2	Mitochondrial carrier homolog 2	Q9Y6C9;E9PIE4	Q9Y6C9;E9PIE4	0.2993	0.433447	0.211823	0.323358					0.409677	0.364278	0.436112	0.364066	-0.274763	-0.11897	-0.10193	-0.16039	-0.394705	-0.246202	-0.0418495	-0.075899	7	6	9	7	4	3	4	6	4	7	7	6	5	3	3	5
MT-CO2	Cytochrome c oxidase subunit 2	P00403	P00403	0.0076937	-0.40305	0.0467593	-0.332314					0.497658	0.626542	0.485839	0.639544	-0.371477	-0.139626	0.100052	-0.824828	-0.335826	-0.180942	0.117152	-0.903588	6	5	7	6	4	5	4	4	5	6	5	5	5	4	4	5
MT-CO3	Cytochrome c oxidase subunit 3	P00414	P00414	-0.297519	-1.0541	0.650473	1.83211				+	0.589795	0.80066	0.310692	0.0244459	-0.340157	-0.288881	0.129311	-0.844199	NaN	-0.597248	-0.0325544	-1.04952	0	0	1	1	2	1	2	0	0	0	2	2	2	2	1	0
MTHFD1	C-1-tetrahydrofolate synthase, cytoplasmic;Methylenetetrahydrofolate dehydrogenase;Methenyltetrahydrofolate cyclohydrolase;Formyltetrahydrofolate synthetase;C-1-tetrahydrofolate synthase, cytoplasmic, N-terminally processed	P11586;F5H2F4;V9GYY3	P11586;F5H2F4	0.483578	-0.151943	-0.535425	0.355399					0.356069	0.548414	0.657826	0.35121	0.657152	0.663727	0.0153722	0.70297	0.471613	0.507273	0.167216	0.729976	8	9	16	12	3	4	1	5	5	8	15	12	5	4	3	7
MTHFD1L	Monofunctional C1-tetrahydrofolate synthase, mitochondrial	A0A087WVM4;Q6UB35;B7ZM99;H0Y327;Q4VXM1;Q4VXM0;Q5JYA8;Q5JYA3;Q6UB35-2	A0A087WVM4;Q6UB35;B7ZM99	-1.38941	0.774223	-0.0970906	-0.493266					0.855467	0.267664	0.529383	0.702036	0.162324	-0.277582	NaN	-0.391254	8.35e-05	0.339045	NaN	NaN	2	1	3	1	0	0	0	0	1	2	5	0	0	0	0	1
MTPN	Myotrophin	P58546;C9JL85	P58546	0.173778	0.947341	1.31704	0.506734					0.447256	0.224075	0.158655	0.292966	-0.1085	-0.00683213	-0.09114	-0.331698	-0.336171	-0.02371	NaN	NaN	1	1	1	1	1	1	1	1	1	1	1	1	1	0	0	1
MTX1	Metaxin-1	Q13505-3;Q13505;A0A0A0MRK6;Q13505-2;A0A0C4DFQ1	Q13505-3;Q13505;A0A0A0MRK6;Q13505-2;A0A0C4DFQ1	-2.33259	-3.62456	-1.68296	-3.76877					0.962449	0.998146	0.899346	0.999975	-0.513104	NaN	NaN	NaN	NaN	NaN	NaN	NaN	0	0	0	0	0	0	0	0	0	2	5	3	2	1	4	5
MTX2	Metaxin-2	O75431;C9JNK6;C9JAZ1;O75431-2;F8WE26	O75431;C9JNK6;C9JAZ1;O75431-2	-0.826222	-2.77581	-0.0970906	-2.22301					0.735795	0.986875	0.529383	0.99157	-0.165857	-0.315346	0.139487	NaN	NaN	NaN	NaN	NaN	0	1	1	1	0	0	0	0	0	1	4	2	0	0	1	2
MUT	Methylmalonyl-CoA mutase, mitochondrial	P22033	P22033	0.702481	2.41591	-0.0970906	0		+			0.295973	0.0265359	0.529383	0.5	NaN	NaN	NaN	NaN	NaN	-0.836315	NaN	NaN	1	1	3	2	0	0	0	0	0	0	0	0	0	0	0	0
MVP	Major vault protein	Q14764;H3BQK6;H3BRL2;H3BUK7;H3BNF6;H3BP76;H3BPZ2;H3BNF2;H3BUP3;H3BQE7;I3L155	Q14764	-0.44219	0.0364021	-0.0970906	0.231232					0.632095	0.488374	0.529383	0.401844	-1.12754	-0.895846	0.206823	-1.03231	-0.399157	-0.989816	NaN	-0.945759	9	11	13	6	0	0	3	4	10	12	12	4	0	0	2	4
MYBBP1A	Myb-binding protein 1A	Q9BQG0;Q9BQG0-2;I3L1L3;I3L2H8	Q9BQG0;Q9BQG0-2;I3L1L3	-0.811385	-0.0629581	-1.53836	0					0.73208	0.520102	0.878606	0.5	0.612236	0.498623	0.286641	-0.252637	-0.0830042	-0.0702182	NaN	NaN	3	5	4	3	1	1	1	0	3	8	3	0	1	1	0	3
MYH10	Myosin-10	P35580;P35580-3;P35580-5;P35580-2;P35580-4;E7ERA5;P13533;REV__Q8IYT3	P35580;P35580-3;P35580-5;P35580-2;P35580-4	1.42081	0.0852145	0.681469	0.324664					0.139153	0.472802	0.30243	0.363539	-0.561921	-0.345516	-0.576253	-0.0288828	-0.581637	-0.520887	-0.45484	-0.00778525	17	19	32	25	15	16	19	25	7	11	28	23	9	12	11	20
MYH14	Myosin-14	Q7Z406;Q7Z406-6;Q7Z406-2;Q7Z406-4;Q7Z406-5;M0QY43;A1L2Z2	Q7Z406;Q7Z406-6;Q7Z406-2;Q7Z406-4;Q7Z406-5;M0QY43	0.311115	0.221506	0.123404	0.400935					0.406177	0.429616	0.462674	0.333231	-1.0007	-0.671694	-0.720329	0.00143255	-0.781216	-0.595194	-0.6759	-0.0316437	3	3	3	2	2	2	2	1	1	3	2	3	2	2	1	1
MYH16	Putative uncharacterized protein MYH16	Q9H6N6	Q9H6N6	2.14425	-0.359996	0.902909	-2.10447					0.0509056	0.613417	0.246495	0.988161	0.00145334	NaN	NaN	-0.647423	-0.0505279	NaN	NaN	-0.371798	1	1	0	0	1	1	0	1	1	0	0	0	0	0	1	1
MYH9	Myosin-9	P35579;Q5BKV1;B1AH99;A0A0C4DFM8;REV__S4R3H4;REV__E7EQT4;REV__Q9UKV3-5;REV__Q9UKV3;P12883;P13535;Q9Y623;P12882;P11055;Q9UKX2	P35579	-0.008498	-0.0765354	0.320786	0.259613					0.502587	0.524432	0.403784	0.39009	-0.772836	-0.625448	-0.763544	0.0858081	-0.945505	-0.689072	-0.740678	0.0569108	132	127	136	133	115	120	118	128	118	118	138	134	100	109	112	119
MYL12A;MYL12B	Myosin regulatory light chain 12A;Myosin regulatory light chain 12B	P19105;O14950;J3QRS3;J3KTJ1	P19105;O14950;J3QRS3;J3KTJ1	0.116134	0.138228	0.165944	-0.651256					0.464694	0.455937	0.449867	0.758069	-0.69816	-0.533202	-0.575197	0.346197	-0.766609	-0.580907	-0.386073	0.418856	2	2	2	2	2	2	1	2	2	2	2	2	2	2	2	2
MYL6	Myosin light polypeptide 6	F8W1R7;P60660-2;P60660;G3V1V0;J3KND3;G8JLA2;B7Z6Z4;G3V1Y7;F8VPF3;F8VZU9;F8W180;H0YI43;F8VXL3	F8W1R7;P60660-2;P60660;G3V1V0;J3KND3;G8JLA2;B7Z6Z4;G3V1Y7;F8VPF3;F8VZU9;F8W180	0.808404	0.0957159	0.502619	-0.123153					0.26867	0.469456	0.351369	0.552662	-0.929093	-0.917796	-0.787802	0.0449915	-1.18695	-0.905911	-0.743173	-0.010385	7	7	8	5	6	6	4	5	4	4	8	7	6	5	3	5
MYL9	Myosin regulatory light polypeptide 9	P24844;P24844-2	P24844;P24844-2	1.28451	0.12247	0.31704	-0.493266					0.163513	0.460943	0.404886	0.702036	-1.02311	-0.842541	-0.783122	0.128759	-0.763121	-0.0851035	-0.75146	NaN	4	3	1	4	1	2	1	0	2	0	2	2	1	1	1	1
MYLK	Myosin light chain kinase, smooth muscle;Myosin light chain kinase, smooth muscle, deglutamylated form	Q15746;Q15746-3;Q15746-6;Q15746-5;Q15746-2;Q15746-4;Q15746-7;Q15746-11;Q15746-9;D6R9C2;Q15746-8;F8WBL7;Q15746-10	Q15746;Q15746-3;Q15746-6;Q15746-5;Q15746-2;Q15746-4	0.00346726	-0.309506	-0.0970906	-0.254798					0.498945	0.59786	0.529383	0.607923	-1.36712	-1.78149	0.0043034	-2.12788	-1.98598	-1.65021	NaN	-1.8153	22	16	22	17	0	1	11	12	16	14	27	13	0	1	7	11
MYO18A	Unconventional myosin-XVIIIa	Q92614-3;A0A0D9SFK2;Q92614-4;Q92614;Q92614-2;Q92614-5;H0YEV9	Q92614-3;A0A0D9SFK2;Q92614-4;Q92614;Q92614-2;Q92614-5	-0.936628	-2.73709	-0.0970906	-1.67118					0.762597	0.985792	0.529383	0.963794	-0.911368	-1.06291	-0.636719	-0.466109	NaN	NaN	NaN	NaN	0	0	0	0	0	0	0	0	1	0	2	5	0	0	1	2
MYO1B	Unconventional myosin-Ib	E9PDF6;O43795;O43795-2;E7EQD9;H7C2Y7;C9JYW1;C9JUP5;C9K0I9	E9PDF6;O43795;O43795-2	-0.297519	0.911179	-0.0970906	0					0.589795	0.232833	0.529383	0.5	-0.486334	-0.705301	-0.208242	-0.453662	NaN	-1.19535	NaN	NaN	0	0	4	1	0	0	0	0	0	0	2	0	0	0	0	0
MYO1C	Unconventional myosin-Ic	F5H6E2;O00159-2;O00159-3;O00159;I3L204;I3L4D4;I3L501;I3L3Y6;I3L168;I3L3F5	F5H6E2;O00159-2;O00159-3;O00159	0.175893	-0.578195	-0.494397	-0.721551					0.446617	0.678297	0.646313	0.781029	-0.825246	-0.634871	-1.03573	-0.00237474	-0.715746	-0.591315	2.20048	0.149448	10	11	16	14	2	3	5	6	10	6	18	13	3	0	2	7
MYO6	Unconventional myosin-VI	Q9UM54-5;A0A0A0MRM8;Q9UM54-2;Q9UM54-6;Q9UM54-4;Q9UM54-1;Q9UM54;A0A0D9SGC1;E7EW20	Q9UM54-5;A0A0A0MRM8;Q9UM54-2;Q9UM54-6;Q9UM54-4;Q9UM54-1;Q9UM54;A0A0D9SGC1;E7EW20	-0.297519	-0.359996	-0.0970906	-1.60319					0.589795	0.613417	0.529383	0.957595	NaN	NaN	NaN	NaN	NaN	NaN	NaN	NaN	0	0	0	0	0	0	0	0	0	0	0	0	0	0	0	1
MYOF	Myoferlin	Q9NZM1-6;Q9NZM1;Q9NZM1-3;Q9NZM1-2;Q9NZM1-5;H0YD14;Q9NZM1-7;Q9NZM1-8;Q9NZM1-4;O75923-15;O75923-3;O75923-9;O75923;O75923-14;O75923-6;O75923-12;O75923-5;O75923-11;O75923-4;O75923-10;O75923-2;O75923-8;O75923-7;O75923-13	Q9NZM1-6;Q9NZM1;Q9NZM1-3;Q9NZM1-2;Q9NZM1-5;H0YD14	-0.648264	-0.440856	-0.300152	-0.208236					0.689576	0.637948	0.590137	0.588565	-1.49583	-1.13549	-0.64944	-0.627568	-1.8064	-1.12154	-0.653058	-0.69422	54	49	74	56	41	41	47	48	54	61	72	58	37	40	46	53
NAA10;NAA11	N-alpha-acetyltransferase 10;N-alpha-acetyltransferase 11	P41227-2;P41227;F8W808;A8MWP7;Q9BSU3;C9JN83;C9JW55	P41227-2;P41227;F8W808;A8MWP7;Q9BSU3	-0.297519	-1.73709	0.0936111	-1					0.589795	0.917861	0.471668	0.858814	0.269302	NaN	NaN	NaN	NaN	NaN	0.11056	NaN	0	0	0	0	2	1	0	0	0	0	0	1	1	1	1	1
NAA15	N-alpha-acetyltransferase 15, NatA auxiliary subunit	A0A0B4J1W3;Q9BXJ9;Q9BXJ9-4;Q6N069-5;Q6N069-4;Q6N069-3;Q6N069-2;Q6N069	A0A0B4J1W3;Q9BXJ9;Q9BXJ9-4	0.483454	-0.0236236	0.514948	-0.493266					0.356104	0.507545	0.347903	0.702036	0.376993	0.510988	0.395745	0.0863936	0.372217	0.20101	-0.0440435	NaN	2	2	3	4	2	2	0	0	0	2	3	5	1	1	0	1
NAA50	N-alpha-acetyltransferase 50	C9J5D1;E7EQ69;Q9GZZ1;Q9GZZ1-2;A0A087WWJ2;C9JZU6;C9J5J3;A0A0D9SF32;B0AZT5;F8WCK0	C9J5D1;E7EQ69;Q9GZZ1;Q9GZZ1-2;A0A087WWJ2;C9JZU6;C9J5J3;A0A0D9SF32;B0AZT5	0.702481	0.393964	-0.0970906	0					0.295973	0.376216	0.529383	0.5	NaN	0.252997	NaN	NaN	0.213434	0.0589285	NaN	NaN	1	1	2	1	0	0	0	0	0	1	2	1	0	0	0	0
NACA	Nascent polypeptide-associated complex subunit alpha	F8VZJ2;F8W0W4;H0YHX9;Q13765;E9PAV3-2;E9PAV3;F8W1N5;F8VNW4;F8VZ58;Q9BZK3	F8VZJ2;F8W0W4;H0YHX9;Q13765;E9PAV3-2;E9PAV3;F8W1N5;F8VNW4	-0.115078	-0.315688	-0.0500845	-0.320146					0.534986	0.599773	0.515167	0.634636	-0.00565929	0.0463286	0.316829	-0.273669	-0.330081	0.0199941	0.154942	-0.244333	3	3	4	3	4	4	4	4	3	3	4	4	4	3	3	4
NAGK	N-acetyl-D-glucosamine kinase	Q9UJ70;H7C3G9;Q9UJ70-2;C9JEV6;H7C286;H7C1L7;H0YEB7;H0YE82;E9PPU6;H0YF44;H0YC94	Q9UJ70;H7C3G9;Q9UJ70-2;C9JEV6;H7C286	0.334044	0.765627	0.686644	-0.120238					0.399405	0.269934	0.30106	0.551423	-0.94947	-0.698076	-0.717753	-0.123595	-0.356131	-0.540486	-0.690903	-0.0272051	4	6	9	7	4	5	5	7	3	6	6	5	3	3	4	7
NAMPT	Nicotinamide phosphoribosyltransferase	P43490;A0A0C4DFS8;C9JG65	P43490;A0A0C4DFS8	2.17378	0.415911	-0.67091	-0.493266	+				0.0485913	0.369565	0.694767	0.702036	1.57519	1.0837	1.66097	0.528092	1.77283	1.24999	1.03561	NaN	4	4	4	2	3	1	1	1	0	1	4	4	3	4	0	1
NAP1L1	Nucleosome assembly protein 1-like 1	H0YHC3;F8W020;F8W118;F8VY35;F8VV59;B7Z9C2;P55209-2;F8W0J6;F5H4R6;H0YIV4;P55209;H0YH88;F8VXI6;F8VUX1;P55209-3;F8W543;F8VRJ2;F8VVB5	H0YHC3;F8W020;F8W118;F8VY35;F8VV59;B7Z9C2;P55209-2;F8W0J6;F5H4R6;H0YIV4;P55209;H0YH88;F8VXI6;F8VUX1;P55209-3;F8W543;F8VRJ2;F8VVB5	0.243041	-0.185612	1.46028	0.164753					0.426438	0.559071	0.133768	0.429711	0.401872	0.331216	0.0970253	0.225006	0.142552	0.268902	0.69848	0.141826	2	3	4	4	1	1	0	2	3	2	2	3	1	1	0	2
NARS	Asparagine--tRNA ligase, cytoplasmic	O43776;K7EIU7;K7EPK2;K7EQ35;O43776-2;K7EMQ6;K7EJ19;REV__H7BZ55	O43776	0.497321	0.358892	0.104198	-0.0931755					0.352168	0.386921	0.46847	0.539893	0.168675	0.211887	0.148218	0.0767396	-0.0896958	0.228317	0.0755243	0.0390809	4	6	9	9	4	6	6	6	4	5	9	8	3	4	0	6
NAV1	Neuron navigator 1	Q8NEY1-6;Q8NEY1-7;Q8NEY1-4;A0A0A0MRJ3;Q8NEY1-2;Q8NEY1-3;Q8NEY1;H0Y6F6;Q8NEY1-5	Q8NEY1-6;Q8NEY1-7;Q8NEY1-4;A0A0A0MRJ3;Q8NEY1-2;Q8NEY1-3;Q8NEY1	5.22231	5.1399	5.61684	5.65848	+	+	+	+	3.38e-05	1.93e-05	1e-05	5.9e-10	NaN	NaN	NaN	NaN	-0.419562	-0.234078	0.359823	-1.11186	7	6	6	10	7	8	7	8	0	0	0	0	0	0	0	0
NCAPH	Condensin complex subunit 2	C9J470;E9PHA2;Q15003;C9JZP1;Q15003-2	C9J470;E9PHA2;Q15003	-2.29752	-2.23279	-0.123777	0					0.960206	0.963089	0.537438	0.5	NaN	NaN	0.441065	NaN	NaN	NaN	NaN	NaN	0	0	0	0	1	0	0	0	2	1	1	2	1	1	0	0
NCKAP1	Nck-associated protein 1	Q9Y2A7;Q9Y2A7-2	Q9Y2A7;Q9Y2A7-2	0.702481	-0.204888	-1.41738	0.566704					0.295973	0.565153	0.859079	0.271193	-0.392614	-0.130715	-0.281021	-0.0567767	NaN	-0.0671855	NaN	NaN	1	1	4	2	1	0	0	1	0	0	6	1	0	2	0	1
NCL	Nucleolin	P19338;H7BY16;C9JYW2;C9JLB1;C9J1H7;C9JWL1	P19338;H7BY16	-0.37637	-0.22942	-0.167335	-0.0546908					0.613014	0.572871	0.550551	0.523441	0.946897	0.809248	0.0723598	0.191474	0.74719	0.769621	0.136022	0.264949	25	26	18	17	20	20	13	17	24	29	18	20	19	18	14	13
NCOA5	Nuclear receptor coactivator 5	Q9HCD5;Q5JY17	Q9HCD5	-4.35829	-3.00613	-6.71208	-4.95923					0.999559	0.991956	1	1	NaN	0.238576	0.0298393	NaN	NaN	NaN	NaN	NaN	0	1	0	0	0	0	0	0	8	4	1	4	15	14	8	7
NDUFA4	NADH dehydrogenase [ubiquinone] 1 alpha subcomplex subunit 4	O00483	O00483	1.17936	-0.38535	-0.681145	-0.493266					0.184088	0.621163	0.697484	0.702036	-0.314123	-0.20666	-0.784178	-1.10032	-0.046035	-0.0829458	NaN	NaN	3	1	3	2	0	0	0	0	1	2	2	1	0	1	0	1
NDUFA5	NADH dehydrogenase [ubiquinone] 1 alpha subcomplex subunit 5	Q16718;F8WAS3;A0A087X1G1;H7BYD0;Q16718-2;A0A087WXR5;C9IZN5	Q16718;F8WAS3;A0A087X1G1;H7BYD0;Q16718-2	0.280273	0.12999	-0.0970906	0					0.415329	0.458553	0.529383	0.5	0.51605	-0.213431	NaN	NaN	NaN	-0.339837	NaN	NaN	0	1	1	0	0	0	0	0	0	0	1	0	0	0	0	0
NDUFA9	NADH dehydrogenase [ubiquinone] 1 alpha subcomplex subunit 9, mitochondrial	Q16795;H3BRM9;F5H0J3;F5GY40	Q16795	1.01148	0.538875	-0.0970906	0					0.220119	0.333068	0.529383	0.5	-0.736465	-0.613139	NaN	NaN	NaN	-0.565863	NaN	NaN	0	1	3	0	0	0	0	0	0	0	2	0	0	0	0	0
NDUFB1	NADH dehydrogenase [ubiquinone] 1 beta subcomplex subunit 1	O75438;O75438-2	O75438	1.66257	1.68277	-0.0970906	0					0.102292	0.0889355	0.529383	0.5	-0.463098	NaN	NaN	NaN	-0.506745	-0.472499	NaN	NaN	3	1	3	3	0	0	0	0	1	1	1	1	0	0	0	0
NDUFB10	NADH dehydrogenase [ubiquinone] 1 beta subcomplex subunit 10	H3BPJ9;O96000;H3BV16;O96000-2	H3BPJ9;O96000;H3BV16;O96000-2	2.02869	1.76903	-0.0970906	-0.493266					0.0608154	0.078329	0.529383	0.702036	-0.564246	-0.670045	NaN	-0.749076	-0.773977	-0.663057	NaN	NaN	2	3	2	1	0	0	0	0	1	2	1	1	0	0	0	1
NDUFB11	NADH dehydrogenase [ubiquinone] 1 beta subcomplex subunit 11, mitochondrial	Q9NX14;Q9NX14-2	Q9NX14;Q9NX14-2	3.39796	2.64	0.460278	1.07344	+	+			0.00476043	0.0172679	0.363365	0.12426	NaN	NaN	NaN	NaN	-0.637287	-0.435584	NaN	NaN	3	2	2	2	1	0	1	1	0	1	0	1	0	0	0	1
NDUFB3	NADH dehydrogenase [ubiquinone] 1 beta subcomplex subunit 3	O43676;C9JKQ2	O43676;C9JKQ2	1.97806	1.35402	-0.0970906	0					0.065607	0.139157	0.529383	0.5	-0.632442	-0.426089	NaN	-0.703356	-0.613463	-0.553768	NaN	NaN	3	3	3	2	1	0	0	0	0	2	2	0	0	0	0	0
NDUFB5	NADH dehydrogenase [ubiquinone] 1 beta subcomplex subunit 5, mitochondrial	O43674;O43674-2;E7EWP0;H0Y886;A0A087WYD0;F8WDZ2;F8WDD2;H7C568	O43674;O43674-2;E7EWP0;H0Y886	2.519	1.75234	-0.0970906	0	+				0.0272973	0.0803027	0.529383	0.5	NaN	NaN	NaN	NaN	0.0952406	0.437107	NaN	NaN	3	1	3	0	0	0	0	0	0	0	0	0	0	0	0	0
NDUFB7	NADH dehydrogenase [ubiquinone] 1 beta subcomplex subunit 7	P17568	P17568	2.28744	2.60325	-0.0970906	0	+	+			0.0404577	0.0185651	0.529383	0.5	-0.657883	NaN	NaN	NaN	-0.004304	-0.637856	NaN	NaN	3	3	3	1	0	0	0	0	0	0	0	0	0	0	0	0
NDUFB8	NADH dehydrogenase [ubiquinone] 1 beta subcomplex subunit 8, mitochondrial	O95169-3;O95169;K9J7I2;E9PQ68;O95169-2;E9PIZ8	O95169-3;O95169;K9J7I2;E9PQ68;O95169-2	3.60794	2.76903	-0.0970906	0	+	+			0.00295274	0.0133093	0.529383	0.5	-0.227927	-1.02403	NaN	NaN	-0.633282	-0.0899842	NaN	NaN	4	4	4	2	0	0	0	0	1	1	0	0	0	0	0	0
NDUFB9	NADH dehydrogenase [ubiquinone] 1 beta subcomplex subunit 9	E9PH64;Q9Y6M9;E7EWZ0;E9PF49	E9PH64;Q9Y6M9;E7EWZ0;E9PF49	3.02129	3.58793	-0.0970906	0	+	+			0.0105734	0.00203472	0.529383	0.5	-0.480837	-0.378677	NaN	-0.808719	-0.880899	-0.559687	NaN	NaN	11	12	6	3	0	0	0	1	0	2	1	1	0	0	0	0
NDUFS1	NADH-ubiquinone oxidoreductase 75 kDa subunit, mitochondrial	B4DJ81;P28331-3;P28331-4;P28331-5;P28331;P28331-2	B4DJ81;P28331-3;P28331-4;P28331-5;P28331;P28331-2	0.294579	0.845706	-0.0970906	0					0.411077	0.249162	0.529383	0.5	-0.180276	-0.455634	NaN	-0.160573	NaN	-0.692075	NaN	NaN	1	0	5	2	0	0	0	0	0	0	3	3	0	0	0	0
NDUFS2	NADH dehydrogenase [ubiquinone] iron-sulfur protein 2, mitochondrial	O75306-2;O75306	O75306-2;O75306	-0.297519	0.84118	-0.0970906	0					0.589795	0.250313	0.529383	0.5	-0.37713	-0.381958	NaN	NaN	NaN	-0.312779	NaN	NaN	0	0	3	0	0	0	0	0	0	0	1	0	0	0	0	0
NDUFS3	NADH dehydrogenase [ubiquinone] iron-sulfur protein 3, mitochondrial	O75489;O75489-2;E9PS48;G3V194;E9PKL8	O75489	0.280273	0.41992	-0.0970906	0					0.415329	0.368354	0.529383	0.5	-0.469427	-0.267467	0.975962	-0.191264	NaN	-0.64806	NaN	NaN	0	2	8	3	1	0	0	0	0	0	7	0	0	0	0	0
NDUFV1	NADH dehydrogenase [ubiquinone] flavoprotein 1, mitochondrial	P49821-2;G3V0I5;P49821;E9PQP1;B4DE93;E9PMX3;E9PPS5;E9PJL9;H0YD04;H0YE81;E9PLC6;E9PPR0;E9PPD6	P49821-2;G3V0I5;P49821;E9PQP1;B4DE93;E9PMX3	-0.297519	0.101941	-0.0970906	0					0.589795	0.467474	0.529383	0.5	-0.257049	-0.766147	NaN	NaN	NaN	-0.841959	NaN	NaN	0	0	3	0	0	0	0	0	0	0	4	1	0	0	0	0
NDUFV2	NADH dehydrogenase [ubiquinone] flavoprotein 2, mitochondrial	P19404;E7EPT4	P19404;E7EPT4	0.702481	0.178905	-0.0970906	0					0.295973	0.443049	0.529383	0.5	-0.82092	-0.538744	NaN	NaN	-0.0718893	-0.476186	NaN	NaN	1	1	2	1	0	0	0	0	0	0	2	0	0	0	0	0
NECAP2	Adaptin ear-binding coat-associated protein 2	Q9NVZ3;Q9NVZ3-2;Q9NVZ3-3;F6SKB8;Q9NVZ3-4;H0Y970;D6RAN6;D6RB24	Q9NVZ3;Q9NVZ3-2;Q9NVZ3-3;F6SKB8;Q9NVZ3-4	-0.137703	-0.393211	-1.12559	0.615509					0.541841	0.623555	0.803624	0.254089	-1.20933	NaN	NaN	NaN	-0.52628	-0.52238	-0.633449	0.190644	1	2	2	2	1	1	0	2	2	0	2	2	2	2	0	1
NEDD8;NEDD8-MDP1	NEDD8	Q15843;F8VSA6;E9PS38;S4R3E9;E9PL57	Q15843;F8VSA6;E9PS38;S4R3E9;E9PL57	0.495371	-1.51593	0.554231	-0.201889					0.352721	0.887579	0.336945	0.585908	-0.0158031	0.201176	0.273977	-0.258784	-0.121797	0.285561	0.314732	-0.179486	2	1	3	1	2	2	1	1	1	1	2	3	1	2	1	1
NEK9	Serine/threonine-protein kinase Nek9	Q8TD19;G3V459;G3V2Z5;G3V5V0	Q8TD19	-1.50557	-3.1539	-1.54108	-2.01826					0.874682	0.994219	0.879022	0.984983	-0.681671	-0.401876	-0.0877756	-0.718648	-0.614943	NaN	NaN	-0.0925372	0	2	0	0	1	0	1	2	3	2	4	3	3	1	5	3
NES	Nestin	P48681	P48681	3.87837	-0.359996	-0.0970906	0	+				0.00154153	0.613417	0.529383	0.5	-1.68069	-0.530774	0.244855	-0.477243	-1.89685	NaN	NaN	NaN	8	3	0	1	0	0	0	0	1	2	0	0	0	0	0	0
NEXN	Nexilin	Q0ZGT2-4;Q0ZGT2;H7BXY5;Q0ZGT2-3;Q0ZGT2-2;E7EUA0;E7ETM8	Q0ZGT2-4;Q0ZGT2;H7BXY5;Q0ZGT2-3;Q0ZGT2-2;E7EUA0;E7ETM8	-0.234125	-0.00501794	-0.0970906	0					0.570892	0.501603	0.529383	0.5	-1.62963	-1.48612	NaN	2.95693	NaN	-1.33684	NaN	NaN	2	0	2	2	0	0	0	0	0	1	2	1	0	0	0	0
NFIC	Nuclear factor 1 C-type	P08651-4;P08651-5;P08651-3;P08651-6;P08651-2;P08651;S4R308;K7ESG9;K7EKH0;U3KPY9;K7EJB0;S4R3K4;O00712-2;A0A087WXP2;Q5W0Y9;B1AKN6;C9JWJ8;O00712;Q14938-6;Q14938-5;Q14938-3;A0A0A0MRX8;K7EN08;Q14938-2;B1AKN7;O00712-4;Q5VW27;B1AKN5;Q14938-4;O00712-5;Q12857-2;Q12857-3;Q14938;Q12857;B1AKN8;Q12857-4;Q5VW30;Q5VW26	P08651-4;P08651-5;P08651-3;P08651-6;P08651-2;P08651	0.280273	1.60426	1.00761	0.318928					0.415329	0.0994883	0.22212	0.365856	NaN	NaN	-0.162632	-0.355077	NaN	0.117531	0.322156	-0.0641564	0	1	0	2	2	0	2	2	0	0	1	1	1	1	1	1
NGDN	Neuroguidin	Q8NEJ9-2;Q8NEJ9;G3V4G1;H0YJ17	Q8NEJ9-2;Q8NEJ9	1.16301	0.200566	-0.0970906	0					0.187428	0.43621	0.529383	0.5	0.629485	0.699433	0.436798	-0.800685	0.970558	NaN	NaN	NaN	1	1	1	0	0	0	0	0	0	1	0	0	0	0	0	0
NHP2L1	NHP2-like protein 1;NHP2-like protein 1, N-terminally processed	P55769;B1AHD1	P55769;B1AHD1	0.00676775	0.575444	0.11427	-0.807229					0.49794	0.322493	0.46543	0.807242	0.773396	0.589429	0.11248	-0.13726	0.567612	0.491337	0.264322	NaN	5	5	6	4	5	3	2	2	3	5	5	4	5	4	3	4
NIT2	Omega-amidase NIT2	Q9NQR4;H7C579;F8WF70	Q9NQR4;H7C579	1.01148	-0.751039	-0.0970906	1.76794				+	0.220119	0.72619	0.529383	0.0286806	NaN	NaN	NaN	NaN	-0.296836	NaN	NaN	0.202938	0	2	1	1	0	0	0	2	0	0	2	1	0	0	0	0
NME2;NME1-NME2;NME1	Nucleoside diphosphate kinase B;Nucleoside diphosphate kinase	P22392-2;Q32Q12;P22392;J3KPD9;E7ERL0;F6XY72;E5RHP0;C9K028	P22392-2;Q32Q12;P22392;J3KPD9;E7ERL0	0.228235	0.119487	1.93398	2.33065				+	0.430873	0.461892	0.0709934	0.00611455	-0.101429	-0.159853	0.00136054	0.112719	0.0166866	-0.025456	0.0598788	0.0225083	12	13	13	13	16	17	18	16	13	13	13	13	13	12	9	11
NME3	Nucleoside diphosphate kinase 3;Nucleoside diphosphate kinase	Q13232;H3BPR2;H3BPD9;H3BMQ7	Q13232;H3BPR2	-0.234125	0.647189	-0.0970906	1.18034					0.570892	0.302166	0.529383	0.102243	-0.6387	-1.02407	NaN	-1.21104	NaN	-0.908582	NaN	-1.33991	1	0	1	1	0	0	3	2	0	1	1	0	0	0	0	2
NME4	Nucleoside diphosphate kinase, mitochondrial;Nucleoside diphosphate kinase	A0A087WVT9;O00746;Q4TT34;F2Z2X0;O00746-2;H0Y6J0	A0A087WVT9;O00746;Q4TT34;F2Z2X0;O00746-2;H0Y6J0	-0.297519	-1.97587	-0.0970906	-0.248967					0.589795	0.943176	0.529383	0.605512	NaN	NaN	NaN	-0.503634	NaN	NaN	NaN	0.0561083	0	0	0	0	0	0	1	1	0	0	1	1	0	0	0	2
NMT1	Glycylpeptide N-tetradecanoyltransferase 1	P30419;P30419-2;B7Z8J4;K7EN82;K7EN42	P30419;P30419-2	-0.890477	-0.894318	-1.08916	-0.424138					0.751578	0.76302	0.795875	0.675787	-0.00918103	0.22813	0.344558	-0.00370057	-0.0456683	0.161686	0.0554465	0.131961	3	4	3	3	5	4	3	4	5	4	5	4	4	5	3	6
NNT	NAD(P) transhydrogenase, mitochondrial	Q13423;E9PCX7;D6RHU2;D6RAI5;H0Y8P5;D6RCR6	Q13423;E9PCX7	1.85562	-2.0988	-0.0970906	0					0.0784022	0.953564	0.529383	0.5	-0.841931	-0.812568	-0.317763	-0.749135	0.164875	NaN	NaN	NaN	2	4	0	0	1	0	1	0	0	1	2	2	1	0	0	0
NOLC1	Nucleolar and coiled-body phosphoprotein 1	Q14978;Q14978-3;A0A0A0MRM9;Q14978-2;S4R402;S4R341;S4R349	Q14978;Q14978-3;A0A0A0MRM9;Q14978-2	-0.297519	-0.359996	0.275448	0					0.589795	0.613417	0.417169	0.5	0.868546	0.571697	0.258821	-0.0860193	NaN	NaN	-1.23127	NaN	0	0	0	0	1	1	0	0	0	0	0	0	1	1	0	0
NOMO2;NOMO1;NOMO3	Nodal modulator 2;Nodal modulator 1;Nodal modulator 3	Q5JPE7-2;Q15155;P69849;Q5JPE7;J3KN36;A0A087X117;Q5JPE7-3;A0A087WW46;A0A087WTD5;H3BUC9;H3BPS9	Q5JPE7-2;Q15155;P69849;Q5JPE7;J3KN36;A0A087X117;Q5JPE7-3;A0A087WW46	-0.297519	-0.36691	0.767676	-2.12746					0.589795	0.615534	0.279987	0.988903	-0.91228	-0.881869	-0.0454983	-0.70054	NaN	-1.02825	0.0610194	-0.831661	0	0	1	1	0	3	2	1	0	0	1	3	1	1	3	2
NONO	Non-POU domain-containing octamer-binding protein	Q15233;Q15233-2;H7C367;C9JYS8;C9IZL7;C9J4X2	Q15233;Q15233-2;H7C367;C9JYS8	0.93503	-0.186713	0.410658	0.419787					0.23778	0.559418	0.377595	0.325896	0.579451	0.529116	-0.0626642	0.0711416	0.501587	0.606921	-0.0204856	0.0185847	19	18	13	12	20	15	14	14	12	13	15	12	16	13	11	13
NOP56	Nucleolar protein 56	O00567;Q5JXT2;H0YDU4;H0Y653	O00567;Q5JXT2	-1.03428	-1.35281	-1.18411	0.112351					0.785	0.860629	0.815693	0.451933	0.461282	0.424791	0.201123	-0.280805	0.856896	NaN	0.103196	-0.230764	0	3	2	1	3	6	2	3	2	2	2	2	6	4	1	2
NOP58	Nucleolar protein 58	Q9Y2X3;H7BZ72;F8WED0	Q9Y2X3	-0.634494	0.117139	-0.325714	-0.0432323					0.685857	0.462638	0.597665	0.518534	0.509887	0.549749	0.178301	-0.243148	0.221502	0.424286	0.234488	-0.0214267	2	3	2	4	8	5	3	8	3	5	3	2	6	6	2	6
NPAT	Protein NPAT	Q14207;H0YET3;E9PKJ1	Q14207;H0YET3	3.01148	5.07615	0.902909	0	+	+			0.0107848	2.41e-05	0.246495	0.5	NaN	NaN	NaN	NaN	1.54537	1.70191	NaN	NaN	1	6	8	9	1	1	0	0	0	0	0	0	0	0	0	0
NPEPPS	Puromycin-sensitive aminopeptidase	E9PLK3;P55786;P55786-2;A6NEC2;E9PP11;A6NEC2-2;E9PJY4;E9PPD4;A6NEC2-3;H0YCQ5;E9PI82;E9PJ74;H0YDG0	E9PLK3;P55786;P55786-2	0.508524	-0.507904	0.0888573	-0.0013196					0.349	0.657872	0.473105	0.500566	-0.347823	0.00946399	NaN	0.693594	NaN	0.0285623	0.146588	0.584152	2	0	5	6	2	4	1	6	0	1	8	7	2	3	3	6
NPLOC4	Nuclear protein localization protein 4 homolog	Q8TAT6;Q8TAT6-2;I3L4U9;I3L3I1;I3L283;A0A0D9SFI9	Q8TAT6;Q8TAT6-2	0.245194	-0.206506	-1.13936	-1.25718					0.425795	0.565663	0.806506	0.911729	-0.14107	0.0348149	NaN	NaN	-0.378778	-0.134968	0.103662	-0.114913	2	5	5	7	4	2	1	1	1	4	7	6	2	3	1	3
NPM1	Nucleophosmin	P06748;P06748-3;P06748-2;E5RI98;E5RGW4	P06748;P06748-3;P06748-2	-0.44087	0.00742174	-0.0366513	0.109846					0.631715	0.497629	0.511101	0.453	0.737063	0.499848	0.125511	-0.161121	0.628967	0.537805	0.169851	-0.161529	12	13	10	11	13	10	9	9	11	13	10	11	12	11	8	9
NPM3	Nucleoplasmin-3	O75607	O75607	-1.17413	0.621743	-0.0970906	0					0.814846	0.30931	0.529383	0.5	0.467225	0.14934	0.508033	NaN	0.324263	0.249781	NaN	NaN	1	1	1	1	0	0	0	0	1	1	1	1	0	0	0	0
NQO1	NAD(P)H dehydrogenase [quinone] 1	B4DLR8;P15559-3;P15559-2;P15559;H3BNV2;H3BRK3	B4DLR8;P15559-3;P15559-2;P15559;H3BNV2;H3BRK3	-0.268326	-0.587423	-0.318705	0.231538					0.581113	0.68094	0.595604	0.401717	-0.821343	-0.857534	-0.170594	-0.964202	-0.78093	-0.827072	-0.311634	-0.98221	3	4	6	6	4	3	5	5	3	4	6	6	3	4	5	6
NR2F2	COUP transcription factor 2	P24468;P24468-3;P24468-2;H3BTC2;P10588	P24468;P24468-3;P24468-2	-4.86862	-0.975867	-5.00471	-3					0.999898	0.7827	0.999928	0.99937	-0.128123	NaN	NaN	NaN	NaN	NaN	NaN	NaN	0	1	0	0	0	0	0	0	4	3	0	1	6	5	3	4
NRD1	Nardilysin	G3V1R5;A0A087WYK8;O43847;O43847-2;B1AKJ5;F5H7V1;H0Y5G9	G3V1R5;A0A087WYK8;O43847;O43847-2;B1AKJ5;F5H7V1;H0Y5G9	1.70248	2.03879	1.94334	0					0.096963	0.0512987	0.0700346	0.5	NaN	0.0220413	NaN	NaN	0.0099723	-1.08977	0.340629	NaN	2	1	4	0	1	3	0	0	0	0	0	0	0	0	0	0
NSF	Vesicle-fusing ATPase	I3L0N3;P46459;P46459-2;I3L2G1;K7EQD6;I3L0L3;I3L338;I3L4Q9	I3L0N3;P46459;P46459-2	0.280273	-0.460859	-0.0970906	-1.15243					0.415329	0.643934	0.529383	0.892304	-0.536738	-0.42554	-0.267108	0.0602616	NaN	-0.150399	NaN	NaN	0	1	4	1	0	0	0	1	0	1	3	2	0	0	0	1
NSUN2	tRNA (cytosine(34)-C(5))-methyltransferase	Q08J23;Q08J23-2;Q08J23-3	Q08J23;Q08J23-2;Q08J23-3	0.467269	0.947983	-0.68296	0					0.360717	0.223921	0.697965	0.5	0.745844	0.650687	0.229706	0.306352	0.746867	0.688277	NaN	NaN	1	4	4	4	1	0	0	1	1	2	3	2	1	0	0	0
NT5DC2	5-nucleotidase domain-containing protein 2	Q9H857-4;Q9H857;Q9H857-3;Q9H857-2;H7C519;H7C4G8	Q9H857-4;Q9H857;Q9H857-3;Q9H857-2;H7C519	-1.29752	-1.0988	-0.0970906	0					0.838926	0.810509	0.529383	0.5	NaN	NaN	NaN	NaN	NaN	NaN	NaN	NaN	0	0	1	1	0	0	0	0	1	1	3	0	0	0	0	0
NT5E	5-nucleotidase	P21589;P21589-2;H0Y7R7;Q96B60;H0Y3X5	P21589;P21589-2	-0.779031	-0.856868	0.254193	-0.52562					0.723887	0.753664	0.423478	0.713978	0.24417	-0.11808	0.41963	-0.694766	-0.132786	-0.34095	0.652994	-0.853207	8	8	11	10	4	2	4	5	8	11	12	11	2	3	4	6
NTMT1	N-terminal Xaa-Pro-Lys N-methyltransferase 1;N-terminal Xaa-Pro-Lys N-methyltransferase 1, N-terminally processed	Q9BV86-2;Q9BV86;S4R344;S4R3J7	Q9BV86-2;Q9BV86;S4R344;S4R3J7	0.294579	1.62237	-0.0970906	0					0.411077	0.0969763	0.529383	0.5	0.0522976	0.532371	NaN	NaN	NaN	0.570832	NaN	NaN	1	0	1	1	0	0	0	0	0	0	1	0	0	0	0	0
NUDT16L1	Protein syndesmos	K7EIN2;Q9BRJ7;K7ENA3;W4VSQ8;Q9BRJ7-2;Q96DE0-3;Q96DE0	K7EIN2;Q9BRJ7;K7ENA3;W4VSQ8;Q9BRJ7-2	-0.297519	-0.913374	1.65047	0					0.589795	0.767704	0.105072	0.5	NaN	-0.56997	-0.0287832	NaN	NaN	NaN	-0.264879	NaN	0	0	0	0	2	1	0	0	0	0	1	0	0	0	0	0
NUDT21	Cleavage and polyadenylation specificity factor subunit 5	O43809;H3BND3;H3BV41	O43809;H3BND3	0.682841	-0.275783	0.157115	0.510959					0.301172	0.58738	0.452521	0.291405	0.551117	0.529402	-0.0368664	0.342303	0.627103	0.560564	0.0346927	0.234135	12	11	12	14	10	10	9	8	10	10	13	13	11	10	6	10
NUMA1	Nuclear mitotic apparatus protein 1	Q14980-2;Q14980;A0A087WY61;Q14980-4;Q14980-3;H0YFY6;Q14980-5;F5H4J1;F5H6Y5;K4DIE0;F5H1L0;F5GZW1;F5H2F3;F5H3L6;F5H0Z7;F5H763;F5GWK2;F5H073;F5H068;F8W6T3;F5H7R5;F5H4Y4;F5GWA2	Q14980-2;Q14980;A0A087WY61;Q14980-4;Q14980-3;H0YFY6	-0.719727	0.630383	-1.04871	-2.37427					0.708558	0.306876	0.787061	0.99465	0.505806	0.375743	-0.278658	0.25552	NaN	0.508309	-0.417989	NaN	0	1	11	10	2	3	1	1	2	1	9	8	2	3	2	2
NUP133	Nuclear pore complex protein Nup133	Q8WUM0	Q8WUM0	-1.63449	-0.37027	-0.982846	-0.926562					0.893833	0.616562	0.772243	0.840389	0.488173	0.522166	-0.0137132	0.258232	0.518089	0.53769	-0.109972	NaN	1	2	2	2	5	6	0	1	1	2	1	2	7	7	1	2
NUP155	Nuclear pore complex protein Nup155	O75694-2;O75694;E9PF10	O75694-2;O75694;E9PF10	-0.936628	-0.751039	0.298629	-0.792351					0.762597	0.72619	0.410312	0.802833	0.781645	0.763495	0.00369668	0.501459	NaN	NaN	0.0718457	0.196351	0	1	1	1	8	6	2	1	1	0	1	1	5	5	1	4
NUP160	Nuclear pore complex protein Nup160	G3V198;Q12769;E9PR16;Q12769-2;Q12769-3;E9PSI3	G3V198;Q12769;E9PR16	-0.826222	0.695583	-1.41018	-0.0681843					0.735795	0.288788	0.857852	0.529216	0.539786	0.607866	0.0700795	0.546734	NaN	0.55337	0.104281	NaN	0	0	1	2	3	0	1	0	0	1	2	0	1	3	1	0
NUP188	Nucleoporin NUP188 homolog	Q5SRE5-2;Q5SRE5;H7C4K7	Q5SRE5-2;Q5SRE5	-0.297519	-0.359996	-1.09573	0					0.589795	0.613417	0.797285	0.5	0.488407	0.428007	0.0475331	0.887371	NaN	NaN	NaN	NaN	0	0	0	0	1	1	0	0	0	0	0	0	1	1	0	0
NUP93	Nuclear pore complex protein Nup93	Q8N1F7;H3BVG0;Q8N1F7-2;H3BPA9;H3BV15;H3BRD9;H3BVE2;H3BV11;H3BRI8;H3BP95;H3BM93;H3BMX0;H3BNN5	Q8N1F7;H3BVG0;Q8N1F7-2	-0.181799	-0.611032	-0.621038	-1.84502					0.555164	0.687661	0.681373	0.976339	0.695674	0.707646	0.0215398	0.633005	0.0362318	NaN	0.0252878	NaN	1	4	1	2	4	4	2	0	0	3	1	2	7	4	5	3
NXN	Nucleoredoxin	Q6DKJ4;Q6DKJ4-3;Q6DKJ4-2;I3L4V6;A0A0C4DGI2	Q6DKJ4;Q6DKJ4-3	0.203719	0.195315	-0.0709213	-0.860174					0.438235	0.437866	0.521472	0.822437	-1.51724	-1.10796	NaN	-0.90586	-1.50032	-1.16874	NaN	NaN	2	1	2	2	0	1	1	1	3	2	2	3	1	0	1	1
OAS3	2-5-oligoadenylate synthase 3	Q9Y6K5;F8VS35;F8VWK9	Q9Y6K5	0.751569	0.224966	-0.0970906	-1.15243					0.283162	0.428528	0.529383	0.892304	2.09585	3.36348	1.51299	2.38711	0.488771	2.57971	NaN	NaN	1	2	2	2	1	1	0	0	0	1	2	1	0	0	0	1
OGDH	2-oxoglutarate dehydrogenase, mitochondrial	Q02218-2;Q02218;E9PDF2;E9PCR7;E9PFG7;A0A0D9SFS3;Q9ULD0-3;Q9ULD0-2;Q9ULD0;Q02218-3;C9J4G7	Q02218-2;Q02218;E9PDF2;E9PCR7;E9PFG7;A0A0D9SFS3	1.85562	1.7243	-0.0970906	0					0.0784022	0.0837025	0.529383	0.5	-0.0507466	-0.65161	NaN	NaN	-0.325068	-0.655077	NaN	NaN	0	2	4	0	0	0	0	0	0	0	1	0	0	0	0	0
OLA1	Obg-like ATPase 1	Q9NTK5;J3KQ32;Q9NTK5-2;Q9NTK5-3;C9JCJ9;C9JTK6	Q9NTK5;J3KQ32;Q9NTK5-2;Q9NTK5-3	-0.647196	-0.167077	0.152213	0.383261					0.689288	0.553209	0.453996	0.340167	0.306795	0.362438	0.290283	0.172699	0.236775	0.304027	0.201706	0.0693477	2	2	7	7	4	3	1	4	2	3	8	7	4	4	2	5
ORC1	Origin recognition complex subunit 1	Q13415	Q13415	1.01148	4.19169	6.55802	5.92985		+	+	+	0.220119	0.000395188	3.19e-07	9.17e-11	NaN	NaN	NaN	NaN	NaN	2.34408	-0.623631	2.35354	0	2	4	8	20	9	10	13	0	0	0	0	0	0	0	0
ORC3	Origin recognition complex subunit 3	Q9UBD5;Q9UBD5-2;Q9UBD5-3	Q9UBD5;Q9UBD5-2;Q9UBD5-3	1.01148	2.64	1.86132	2.58496		+		+	0.220119	0.0172679	0.07879	0.00272758	1.60365	NaN	NaN	NaN	NaN	1.66588	-0.45938	2.06195	0	2	4	4	3	1	1	3	0	0	0	0	0	0	0	0
ORC5	Origin recognition complex subunit 5	O43913-2;O43913	O43913-2;O43913	-0.297519	1.24896	2.17478	1.60299			+	+	0.589795	0.158655	0.0493423	0.0424238	NaN	NaN	NaN	NaN	NaN	NaN	-0.102965	1.0957	0	0	1	1	2	1	1	1	0	0	0	0	0	1	0	0
OSBPL8	Oxysterol-binding protein-related protein 8;Oxysterol-binding protein	Q9BZF1-3;Q9BZF1-2;Q9BZF1;F8VUA7;F8VQX7	Q9BZF1-3;Q9BZF1-2;Q9BZF1;F8VUA7;F8VQX7	3.6998	2.87642	3.08192	4.09066	+	+	+	+	0.00237828	0.0106379	0.00964101	5.48e-06	-0.302384	-0.628863	NaN	-0.766644	-0.518509	-0.40215	0.162482	-0.259153	2	3	3	2	2	2	6	5	0	0	1	1	0	0	0	0
OSTC	Oligosaccharyltransferase complex subunit OSTC	Q9NRP0;Q9NRP0-2;A0A087WUD3	Q9NRP0;Q9NRP0-2;A0A087WUD3	-0.47503	0.172077	0.0906332	0.917736					0.641497	0.445209	0.472568	0.161926	-0.714247	-0.981141	-0.086876	-0.693775	-0.761612	-0.820231	-0.486725	-0.433308	2	1	1	1	1	1	2	1	2	1	2	1	1	1	2	2
OTUB1	Ubiquitin thioesterase OTUB1	F5GYN4;Q96FW1;J3KR44;F5H6Q1;F5GYJ8;F5H3F0;Q96FW1-2	F5GYN4;Q96FW1;J3KR44;F5H6Q1;F5GYJ8;F5H3F0;Q96FW1-2	0.870547	0.218293	0.108376	-0.195372					0.253263	0.430626	0.467209	0.583176	0.076847	0.0567882	0.122828	0.0654084	-0.00832581	0.116401	0.0861115	0.0359024	4	5	6	5	6	5	5	5	3	5	5	5	4	6	4	5
P4HA1	Prolyl 4-hydroxylase subunit alpha-1	P13674	P13674	-0.936628	-1.14355	-0.521568	-0.666883					0.762597	0.820061	0.653953	0.763283	-1.08324	-1.73167	-1.04318	-0.119152	NaN	-1.39303	-0.112827	-0.0228588	0	1	6	3	2	0	2	2	1	0	8	6	2	0	2	7
P4HA2	Prolyl 4-hydroxylase subunit alpha-2	O15460-2;O15460;C9JX45;A8MXE0;E7ERI1;E7ENX0;E7EPI9;C9JCP0;C9JN43;C9JIG4	O15460-2;O15460	0.702481	0.299018	-1.41738	-1.16631					0.295973	0.405392	0.859079	0.895041	-1.39718	-1.63125	-1.30509	0.214106	NaN	-1.2698	-1.00913	NaN	1	1	8	4	2	2	0	2	0	0	6	2	3	4	0	4
P4HB	Protein disulfide-isomerase	P07237;H7BZ94;H0Y3Z3;I3L398;I3L312;I3NI03;I3L4M2;I3L0S0;I3L3U6;I3L514;I3L3P5;I3L1Y5	P07237;H7BZ94;H0Y3Z3	-0.767392	-0.50707	-0.593762	-0.346589					0.72091	0.657626	0.673944	0.645271	-1.49087	-1.66458	-0.820751	-0.805369	-1.78999	-1.6971	-1.01234	-0.871634	10	8	19	16	10	8	9	13	14	14	19	20	11	11	12	16
PA2G4	Proliferation-associated protein 2G4	Q9UQ80;Q9UQ80-2;F8VR77;F8W0A3;H0YIN7;F8VZ69	Q9UQ80;Q9UQ80-2;F8VR77	-0.355055	-0.13897	-0.0687907	-0.39197					0.606773	0.544298	0.520828	0.663258	0.924678	0.761725	0.257447	0.548843	0.614299	0.588627	0.219634	0.604415	5	6	8	10	8	9	6	8	5	9	9	9	10	9	10	8
PABPC1;PABPC3	Polyadenylate-binding protein 1;Polyadenylate-binding protein 3	A0A087WTT1;P11940-2;P11940;E7EQV3;E7ERJ7;H0YAR2;Q9H361;H0YBN4;H0YAP2;Q4VXU2;E5RGH3;E5RJB9;H0YB86;E5RH24;Q4VXU2-2;E5RHG7;H0YAS6;H0YB75;Q96DU9-2;Q96DU9;H0YC10;E5RGC4;E5RFD8;H0YAS7	A0A087WTT1;P11940-2;P11940;E7EQV3;E7ERJ7;H0YAR2;Q9H361	-0.41916	-0.61066	0.0838029	0.267512					0.625453	0.687556	0.474633	0.386835	0.377457	0.405609	0.0765369	0.104898	0.140288	0.375114	0.102377	0.116612	14	15	16	14	17	16	12	15	17	19	18	18	15	14	11	12
PABPC4	Polyadenylate-binding protein 4	B1ANR0;Q13310-2;Q13310;Q13310-3;H0Y5F5;H0YCC8;H0YEU6;B1ANR1;H0YEQ8;P0CB38	B1ANR0;Q13310-2;Q13310;Q13310-3;H0Y5F5	-0.742735	-0.763134	-0.548239	-0.942629					0.714552	0.729405	0.661392	0.844549	0.302607	0.223467	0.0947707	0.0236051	0.154744	0.134824	0.0804331	0.0114672	2	3	3	4	5	5	3	3	3	5	5	4	7	7	4	3
PABPN1	Polyadenylate-binding protein 2	Q86U42-2;Q86U42;Q92843-2;B4DEH8;G3V4T2;H0YJH9;A6NDY0-2;A6NDY0;A6NDY0-4	Q86U42-2;Q86U42;Q92843-2;B4DEH8;G3V4T2	0.366969	2.24846	0.461493	1.01025		+			0.389735	0.0359092	0.363019	0.138735	0.49523	0.526182	-0.0854902	0.462098	0.68975	0.32001	-0.123285	0.699221	4	2	3	3	4	5	3	4	3	3	3	2	4	2	2	2
PAF1	RNA polymerase II-associated factor 1 homolog	Q8N7H5-3;Q8N7H5-2;Q8N7H5;B4DGJ5	Q8N7H5-3;Q8N7H5-2;Q8N7H5	1.71317	1.24896	2.17478	2.21165			+	+	0.0955708	0.158655	0.0493423	0.00871433	NaN	NaN	NaN	NaN	0.0607708	NaN	0.179192	-0.180412	2	1	1	2	2	2	2	0	0	0	0	0	0	0	0	0
PAFAH1B2	Platelet-activating factor acetylhydrolase IB subunit beta	P68402;P68402-3;P68402-2;J3KNE3;P68402-4	P68402;P68402-3;P68402-2;J3KNE3;P68402-4	0.32585	0.0970278	0.514948	-0.152433					0.401822	0.469039	0.347903	0.565082	-0.134152	-0.301289	0.000912551	-0.0705776	-0.192478	-0.404978	NaN	0.166784	1	2	2	2	0	1	1	1	1	2	2	2	0	1	1	1
PAFAH1B3	Platelet-activating factor acetylhydrolase IB subunit gamma	Q15102;M0R389;M0R1K3	Q15102;M0R389	-1.23412	2.04987	0.902909	0.566704					0.826822	0.0503717	0.246495	0.271193	-0.00487538	0.166575	-0.289425	0.656661	-0.116689	0.208344	0.261007	NaN	2	1	1	1	1	2	0	1	1	1	2	1	1	1	0	0
PAICS	Multifunctional protein ADE2;Phosphoribosylaminoimidazole-succinocarboxamide synthase;Phosphoribosylaminoimidazole carboxylase	P22234;E9PBS1;P22234-2;D6RF62	P22234;E9PBS1;P22234-2;D6RF62	-0.131718	-0.0453742	-0.449745	-0.00334845					0.540028	0.51449	0.633629	0.501436	0.72521	0.656705	0.139644	1.00805	0.61496	0.584611	0.229579	1.05284	12	13	16	14	11	8	5	15	10	12	17	12	9	11	4	12
PALLD	Palladin	Q8WX93-4;Q8WX93-3;Q8WX93;Q8WX93-8;Q8WX93-5;Q8WX93-7;Q8WX93-2;Q8WX93-9;H0YA05;F8WA26;D6R9F5;A0A087WX60;Q86TC9-2;Q86TC9	Q8WX93-4;Q8WX93-3;Q8WX93;Q8WX93-8;Q8WX93-5;Q8WX93-7;Q8WX93-2;Q8WX93-9	0.206769	-0.0329837	1.36308	0.430395					0.437318	0.510534	0.150344	0.321798	-1.9815	-2.09196	-1.16444	-0.816495	-1.44102	-1.71364	-0.663405	-0.785683	9	6	11	7	5	5	10	8	6	4	11	9	2	1	5	8
PAPSS1	Bifunctional 3-phosphoadenosine 5-phosphosulfate synthase 1;Sulfate adenylyltransferase;Adenylyl-sulfate kinase	O43252	O43252	1.69171	-0.03739	1.30049	0.311647					0.0983805	0.511941	0.161715	0.368804	-0.104193	-0.0717842	-0.0318	0.144745	0.132424	0.22209	0.106474	-0.00505362	1	2	3	4	5	5	2	3	0	1	4	2	2	4	2	5
PAPSS2	Bifunctional 3-phosphoadenosine 5-phosphosulfate synthase 2;Sulfate adenylyltransferase;Adenylyl-sulfate kinase	O95340;O95340-2	O95340;O95340-2	1.36911	0.231927	0.12461	0.320857					0.148086	0.426342	0.462311	0.365076	-0.63651	-0.289384	-0.551122	0.489381	-0.750874	-0.290911	-0.435974	0.488005	10	6	12	10	14	13	13	12	5	4	9	8	12	16	8	12
PARP1	Poly [ADP-ribose] polymerase 1	P09874;Q5VX84;Q5VX85	P09874	0.852466	0.835085	1.09805	0.870809					0.257697	0.251868	0.202217	0.174604	1.25644	1.31863	-0.107807	1.14604	1.26408	1.39701	-0.0616963	1.15609	18	18	28	28	24	20	19	18	5	10	19	16	15	16	8	14
PARP14	Poly [ADP-ribose] polymerase 14	Q460N5-1;Q460N5;Q460N5-4;Q460N5-3;H7C5R8;Q460N5-5;H7C4Y3	Q460N5-1;Q460N5;Q460N5-4;Q460N5-3;H7C5R8	6.35537	5.84017	5.85446	4.02027	+	+	+	+	6.19e-07	1.46e-06	4.39e-06	7.74e-06	-0.152438	0.0545775	NaN	NaN	0.0223974	0.536255	0.053686	-0.4238	15	20	22	22	13	15	6	6	0	1	2	1	0	0	0	0
PARP4	Poly [ADP-ribose] polymerase 4	Q9UKK3	Q9UKK3	-0.297519	-0.15882	-0.0970906	0					0.589795	0.550594	0.529383	0.5	-0.696388	-0.708899	NaN	-0.628735	NaN	-1.44192	NaN	NaN	0	0	2	1	0	0	0	0	0	0	2	1	0	0	0	0
PARP9	Poly [ADP-ribose] polymerase 9	Q8IXQ6-3;Q8IXQ6-2;Q8IXQ6;G5E9U8;C9K0E5	Q8IXQ6-3;Q8IXQ6-2;Q8IXQ6	5.3728	5.22497	0.514948	1	+	+			2.07e-05	1.44e-05	0.347903	0.141186	NaN	NaN	NaN	NaN	0.445058	0.943121	NaN	NaN	7	8	4	8	0	1	1	1	0	0	0	0	0	0	0	0
PARVA	Alpha-parvin	Q9NVD7;J3KNQ4;E9PS97;Q9NVD7-2;A0A087WZB5;Q9HBI1-3;Q9HBI1;Q9HBI1-2	Q9NVD7;J3KNQ4;E9PS97	-2.06008	1.06837	0.514948	0.566704					0.942015	0.196164	0.347903	0.271193	-0.914754	-0.936064	-0.448707	-0.296485	NaN	-1.14558	NaN	NaN	1	0	3	3	0	1	0	1	3	1	2	1	1	0	0	0
PCBP1	Poly(rC)-binding protein 1	Q15365	Q15365	-0.0408548	0.147509	0.458474	0.19502					0.512434	0.452992	0.363879	0.416972	0.419796	0.332299	0.117462	0.0832554	0.355542	0.386402	0.157705	0.0877086	9	8	9	8	12	11	9	11	9	9	9	9	9	9	9	9
PCBP2	Poly(rC)-binding protein 2	Q15366-3;Q15366-6;Q15366-2;Q15366-4;Q15366;Q15366-7;F8VZX2;Q15366-5;H3BRU6;Q15366-8;F8W0G4;F8VXH9;H3BSS4;F8W1G6;F8VRH0;P57721-5;E9PFP8;P57721-4;P57721;J3QT27;P57721-2;P57721-3;H3BND9;F8VTZ0;H3BSP4;C9K0A2;F8WC71;C9IZV9;C9J7A9;C9JSA6;C9J5V4;C9JTY5;C9JZY3;C9J0A4;P57723-2;F6TJN8;P57723	Q15366-3;Q15366-6;Q15366-2;Q15366-4;Q15366;Q15366-7;F8VZX2;Q15366-5;H3BRU6;Q15366-8	-0.179205	-0.0909424	0.393017	0.0419836					0.554382	0.529023	0.382695	0.482001	0.622732	0.437558	-0.0528604	0.118884	0.478749	0.396608	-0.0214265	0.0848061	7	8	9	8	8	8	5	6	7	7	10	8	7	7	5	7
PCF11	Pre-mRNA cleavage complex 2 protein Pcf11	O94913;E9PQ01;A0A0C4DGU6;E9PKN0;E9PQF9;E9PNY7	O94913;E9PQ01;A0A0C4DGU6;E9PKN0	2.69171	1.39456	3.02655	0.602993	+		+		0.0199942	0.132088	0.0107811	0.258421	NaN	NaN	NaN	NaN	0.113685	-0.178902	0.0510723	NaN	2	3	3	0	1	1	1	0	0	0	0	0	0	0	0	0
PCLO	Protein piccolo	Q9Y6V0-2;Q9Y6V0-6;Q9Y6V0;Q9Y6V0-5	Q9Y6V0-2;Q9Y6V0-6;Q9Y6V0;Q9Y6V0-5	0.610586	-0.913374	0.590726	2.35422				+	0.320644	0.767704	0.326887	0.0056901	0.133035	-0.202208	0.423663	0.141774	-0.0127502	NaN	0.368844	0.0763482	1	1	0	0	1	1	1	1	0	1	1	0	0	1	1	0
PCM1	Pericentriolar material 1 protein	A6NNN6;Q15154-2;E7ETA6;Q15154;Q15154-3;E9PGW9;E7EV93;E5RGQ4;H0YBA1	A6NNN6;Q15154-2;E7ETA6;Q15154	2.38465	0.91771	1.17478	0	+				0.0344123	0.231237	0.1862	0.5	NaN	NaN	0.125639	NaN	1.15877	NaN	NaN	NaN	1	4	1	0	1	0	0	0	0	0	0	0	0	0	0	0
PCMT1	Protein-L-isoaspartate(D-aspartate) O-methyltransferase;Protein-L-isoaspartate O-methyltransferase	P22061;P22061-2;A0A0A0MRJ6;H7BY58;F6S8N6;C9J0F2;F8WDT3;F8WAV5;F8WAX2;H7C4X2	P22061;P22061-2;A0A0A0MRJ6;H7BY58;F6S8N6	4.6998	1.25665	4.01903	1.91359	+		+	+	0.000167825	0.15717	0.00113828	0.0198371	-0.151323	0.013097	-0.0477109	0.690682	0.30857	0.339009	0.0398814	0.625137	8	8	5	5	5	6	3	6	0	0	4	4	1	1	0	2
PCNA	Proliferating cell nuclear antigen	P12004	P12004	1.37163	-0.269547	-0.429305	0.795628					0.147642	0.585435	0.627773	0.196191	1.06998	1.1161	-0.344755	0.788713	1.20304	0.428215	-0.443943	NaN	1	3	3	2	6	4	0	1	1	2	0	1	4	5	0	1
PCNP	PEST proteolytic signal-containing nuclear protein	Q8WW12-2;Q8WW12	Q8WW12-2;Q8WW12	0.280273	0.364333	-0.825219	2.02696				+	0.415329	0.385255	0.73453	0.014666	NaN	0.560144	0.0340251	0.622467	NaN	0.414575	0.225761	0.342934	0	1	2	1	2	1	2	1	0	0	1	0	1	1	0	0
PCYT1A	Choline-phosphate cytidylyltransferase A	P49585;C9JEJ2;C9J050;H7C1T3;H7BZN1;C9J2E1;Q9Y5K3-2;Q9Y5K3-4;Q9Y5K3-3;Q9Y5K3;C9JVS0;C9JPY0;F8WAZ5;F2Z2B1	P49585;C9JEJ2;C9J050;H7C1T3;H7BZN1;C9J2E1	4.51748	2.60926	0.902909	1.68304	+	+		+	0.00028343	0.0183474	0.246495	0.0352035	-0.473737	-0.387881	0.0227998	-0.754571	-0.464454	-0.364933	-0.268334	-0.419874	10	5	11	9	2	1	2	2	0	1	4	4	0	0	1	0
PCYT2	Ethanolamine-phosphate cytidylyltransferase	I3L1R7;Q99447;Q99447-3;Q99447-4;Q99447-2;I3L1L9;I3L2Q1;I3L3V9;I3L102;I3L1C4	I3L1R7;Q99447;Q99447-3;Q99447-4;Q99447-2;I3L1L9;I3L2Q1;I3L3V9	2.69711	3.03879	0.514948	0	+	+			0.0197957	0.00748601	0.347903	0.5	0.053429	NaN	NaN	NaN	-0.497367	-0.569961	NaN	NaN	3	4	5	2	0	1	0	0	0	1	0	0	0	0	0	0
PDCD6	Programmed cell death protein 6	A0A024QZ42;O75340-2;O75340;H0Y9X3;A0A087WZ38	A0A024QZ42;O75340-2;O75340	1.65547	0.987376	-0.0970906	0					0.103262	0.214601	0.529383	0.5	-0.367588	0.0227342	NaN	NaN	0.140541	0.322568	NaN	NaN	3	2	3	2	0	0	0	0	1	1	0	1	0	0	0	0
PDCD6IP	Programmed cell death 6-interacting protein	Q8WUM4;Q8WUM4-2;Q8WUM4-3;C9IZF9;F8WEQ7;F8WBR8;F8WDK9	Q8WUM4;Q8WUM4-2	1.29458	-1.04436	-0.0970906	-0.493266					0.161623	0.798475	0.529383	0.702036	-0.497897	-0.287573	0.0599728	0.108094	-0.127751	-0.430462	NaN	NaN	2	2	5	2	0	0	0	1	0	0	8	3	0	0	0	1
PDE12	2,5-phosphodiesterase 12	F6T1Q0;Q6L8Q7-2;Q6L8Q7	F6T1Q0;Q6L8Q7-2;Q6L8Q7	0.482772	-0.0126235	-0.0970906	0					0.356298	0.504032	0.529383	0.5	0.0551831	-0.134707	NaN	NaN	0.20097	0.37203	NaN	NaN	1	2	3	2	0	0	0	0	0	1	2	2	0	0	0	0
PDE5A	cGMP-specific 3,5-cyclic phosphodiesterase	G5E9C5;O76074-2;O76074;C9JGT3;H0YA14	G5E9C5;O76074-2;O76074	0.214102	-0.545698	-0.0970906	-0.0884573					0.435115	0.668916	0.529383	0.537879	-2.11102	-2.60686	NaN	-1.50799	-1.47439	-2.27873	NaN	2.51793	3	2	6	3	0	0	1	3	2	1	7	6	0	0	0	6
PDHA1	Pyruvate dehydrogenase E1 component subunit alpha, somatic form, mitochondrial	P08559-3;P08559;P08559-2;P08559-4;Q5JPU0;Q5JPT9;Q5JPU1;Q5JPU2;P29803	P08559-3;P08559;P08559-2;P08559-4;Q5JPU0;Q5JPT9;Q5JPU1	0.751569	1.12999	-0.0970906	1.35422					0.283162	0.182801	0.529383	0.0727244	0.426943	NaN	NaN	NaN	0.0603156	-0.267897	NaN	-0.256548	1	2	3	1	1	0	1	0	0	1	2	0	0	0	0	0
PDIA3	Protein disulfide-isomerase A3	P30101	P30101	-0.863971	-0.482206	0.874408	-0.703448					0.745129	0.650283	0.253371	0.775239	-0.737763	-1.19034	-0.391619	-0.50714	-1.32914	-1.12928	-0.425893	-0.462288	3	2	9	5	2	1	2	4	5	5	10	4	1	0	1	5
PDIA4	Protein disulfide-isomerase A4	P13667	P13667	-1.61924	-0.828733	-0.761671	-1.05852					0.891685	0.746507	0.718476	0.872422	-1.1743	-0.9724	-0.134965	-0.745832	-0.867671	-1.29662	-0.120063	-0.776007	0	3	9	8	3	3	4	5	3	6	12	12	6	4	7	7
PDIA6	Protein disulfide-isomerase A6	Q15084-3;Q15084;Q15084-4;Q15084-5;Q15084-2	Q15084-3;Q15084;Q15084-4;Q15084-5;Q15084-2	-0.861707	-0.193343	-0.68296	-0.144205					0.744574	0.561512	0.697965	0.561597	-1.00269	-1.26944	-0.17306	-0.913947	-1.23727	-1.42755	-0.0171374	-1.12954	4	5	9	8	1	2	2	3	8	6	9	8	2	1	1	4
PDLIM1	PDZ and LIM domain protein 1	O00151	O00151	1.10984	0.521014	1.1244	0.817734					0.198539	0.338281	0.196628	0.189682	-1.07814	-0.704426	-0.697009	0.0441729	-1.09745	-0.546999	0.644489	0.155558	7	5	6	6	4	2	5	6	4	3	4	4	3	2	1	4
PDLIM2	PDZ and LIM domain protein 2	B3KPU0;A0A087WVI1;Q96JY6;Q96JY6-5;E5RGS7;H0YBP7;Q96JY6-3;A0A087WUQ1;C9JS55;Q96JY6-4;H7C1D1	B3KPU0;A0A087WVI1;Q96JY6;Q96JY6-5;E5RGS7;H0YBP7;Q96JY6-3	0.173778	0.609096	0.460278	0					0.447256	0.312888	0.363365	0.5	-0.148908	-1.62105	NaN	-0.62357	NaN	-1.35574	NaN	NaN	1	1	2	2	1	0	0	0	0	1	1	1	0	1	0	0
PDLIM4	PDZ and LIM domain protein 4	P50479;P50479-2;C9J542	P50479;P50479-2	0.554293	-0.0780939	1.90291	1.5667				+	0.336168	0.524928	0.0742517	0.04607	-0.94662	-0.910511	0.590962	-0.524254	-1.02808	-0.211053	0.395553	0.889447	5	5	4	5	2	2	1	2	4	4	6	2	0	0	0	0
PDLIM5	PDZ and LIM domain protein 5	Q96HC4;Q96HC4-4;Q96HC4-6;Q96HC4-7;Q96HC4-3;H0Y8Y3;Q96HC4-2;H0YBI4;A0A0A0MSP3;A0A0D9SFR4;D6RAA1;A0A0D9SFW3;D6RGG6;H0Y929;Q96HC4-5	Q96HC4;Q96HC4-4;Q96HC4-6;Q96HC4-7	0.0372278	2.22497	2.93089	1.92093		+	+	+	0.488669	0.0374192	0.0130284	0.019461	-0.563949	-0.462107	-0.742484	0.499295	-1.31206	-0.47455	-0.847332	0.0860551	1	1	4	5	3	5	0	4	1	2	2	3	0	1	0	1
PDLIM7	PDZ and LIM domain protein 7	Q9NR12;Q9NR12-2;Q9NR12-5;Q9NR12-6;Q9NR12-4;D6RH06;D6RF83;Q9NR12-3;H7BYK4;D6RAN1;H0Y8W6	Q9NR12;Q9NR12-2	0.40045	0.143445	0.84419	0.309738					0.379971	0.454282	0.260769	0.369579	-1.03975	-1.05899	-0.572912	-0.425037	-1.30311	-0.91026	-0.583812	-0.479648	10	7	8	7	10	10	7	8	9	7	7	8	10	7	6	9
PDS5A	Sister chromatid cohesion protein PDS5 homolog A	Q29RF7;Q29RF7-3;H0Y9L6;H0Y9L9	Q29RF7	0.280273	1.60325	-0.0970906	0					0.415329	0.0996297	0.529383	0.5	1.21898	1.12257	0.186791	0.822027	NaN	1.53838	NaN	NaN	0	1	2	1	0	0	0	0	0	0	1	0	0	0	0	0
PDXDC1;PDXDC2P	Pyridoxal-dependent decarboxylase domain-containing protein 1;Putative pyridoxal-dependent decarboxylase domain-containing protein 2	Q6P996-3;Q6P996-4;Q6P996-5;Q6P996;H3BND4;Q6P996-2;Q86XE2;Q6P474;J3KNK7;H3BNL6	Q6P996-3;Q6P996-4;Q6P996-5;Q6P996;H3BND4;Q6P996-2;Q86XE2;Q6P474	-0.297519	1.04987	-0.0970906	0					0.589795	0.200288	0.529383	0.5	-0.774244	-0.575015	-0.033034	-0.485418	NaN	-1.02757	NaN	NaN	0	0	3	1	0	0	0	0	0	0	1	0	0	0	0	0
PDXK	Pyridoxal kinase	O00764;F2Z2Y4;O00764-2;O00764-3;A8MV33	O00764;F2Z2Y4;O00764-2;O00764-3	-0.924448	-0.169052	-0.0970906	-1.03649					0.759715	0.553834	0.529383	0.867409	-0.204419	-0.0200953	NaN	0.8492	-0.294136	-0.164544	NaN	NaN	1	1	2	1	0	0	1	1	1	1	2	2	0	0	0	3
PEBP1	Phosphatidylethanolamine-binding protein 1;Hippocampal cholinergic neurostimulating peptide	P30086	P30086	1.82277	0.347335	-0.199977	0.29327					0.082137	0.390468	0.560343	0.376279	-0.454173	-0.0679446	0.0517903	0.0667409	-0.518341	-0.0134252	-0.00587875	-0.0947528	4	4	7	6	3	5	5	5	0	3	7	5	3	5	4	4
PELO	Protein pelota homolog	Q9BRX2	Q9BRX2	1.02869	-0.359996	-2.09709	-0.493266					0.216247	0.613417	0.944339	0.702036	-0.0602018	0.116856	0.166523	0.20601	-0.180122	NaN	NaN	NaN	2	2	0	0	0	0	0	0	1	1	0	0	2	2	0	1
PFKL	6-phosphofructokinase, liver type	P17858;P17858-2;F8WEU2	P17858;P17858-2	-0.297519	-0.359996	-0.667846	-0.844937					0.589795	0.613417	0.693951	0.818143	0.303312	0.000146734	-0.43623	0.858345	NaN	NaN	-0.263591	0.764459	0	0	1	1	4	5	4	5	0	0	0	0	3	5	4	5
PFKP	6-phosphofructokinase type C	Q01813;Q01813-2;B1APP6;B1APP8;Q5VSR5;H0Y757;V9GYV7;V9GY25;H0Y3Y3	Q01813;Q01813-2	1.46813	0.872266	0.0522914	-0.0233603					0.131307	0.242466	0.484165	0.510017	0.474067	0.182415	-0.160734	0.850775	0.401712	-0.0977114	-0.095474	0.978962	4	6	6	4	12	15	7	9	1	4	2	3	10	11	7	13
PFN1	Profilin-1	P07737;K7EJ44;CON__P02584;I3L3D5	P07737;K7EJ44	0.241022	0.124893	0.315514	0.104249					0.427043	0.460173	0.405335	0.455385	-0.11656	-0.0676975	0.017168	0.0915495	-0.0942573	0.0583749	0.0384699	0.185852	10	9	9	9	10	9	9	9	8	9	9	8	9	9	8	9
PFN2	Profilin-2;Profilin	C9J712;P35080;C9JQ45;C9J2N0	C9J712;P35080;C9JQ45;C9J2N0	-0.234125	0.682774	-0.0970906	0					0.570892	0.292302	0.529383	0.5	0.02183	-0.0347976	NaN	-0.190251	NaN	0.0320613	NaN	NaN	1	0	2	2	0	0	0	0	0	1	2	2	0	0	0	0
PFN2	Profilin-2;Profilin	C9J0J7;P35080-2;G5E9Q6	C9J0J7;P35080-2;G5E9Q6	0.133539	0.0281018	1.19547	0.485427					0.45942	0.491025	0.182019	0.300892	0.100762	-0.097391	-0.0215818	-0.0421406	-0.0680755	-0.141632	0.134581	-0.0119141	3	3	5	5	3	5	3	4	2	3	5	5	3	2	3	3
PGAM1	Phosphoglycerate mutase 1	P18669;P15259;Q8N0Y7	P18669	0.874789	-0.0987874	1.92085	0.0481635					0.252228	0.531522	0.0723568	0.479354	0.622804	0.460778	0.0585231	1.00107	0.714959	0.535647	0.206782	1.00436	5	2	5	4	3	5	2	6	2	1	5	6	1	2	1	4
PGD	6-phosphogluconate dehydrogenase, decarboxylating	P52209-2;P52209;K7EPF6;K7EM49;K7ELN9;K7EMN2	P52209-2;P52209	-0.0489103	0.115292	0.872943	0.381348					0.514885	0.463226	0.253727	0.340921	-0.642448	-0.368816	-0.0395858	-0.53217	-0.790165	-0.364649	-0.00579212	-0.588098	13	12	17	13	12	9	12	13	12	12	13	12	5	8	9	12
PGK1	Phosphoglycerate kinase 1	P00558;P00558-2;P07205	P00558;P00558-2	0.16887	0.211515	0.0830666	0.0264216					0.448737	0.43276	0.474855	0.48867	0.752315	0.492121	-0.0785551	1.15009	0.661757	0.537565	-0.0431304	1.12963	20	23	21	16	18	18	15	17	16	19	18	18	17	19	16	21
PGM1	Phosphoglucomutase-1	P36871;P36871-2;P36871-3	P36871;P36871-2;P36871-3	6.54853	6.8893	5.9983	5.71658	+	+	+	+	2.92e-07	1.73e-08	2.63e-06	3.99e-10	NaN	0.0240086	NaN	NaN	0.250979	0.0231183	-0.21892	0.896982	14	15	18	16	14	11	7	14	1	0	0	0	0	0	0	0
PGM3	Phosphoacetylglucosamine mutase	A0A087WT27;J3KN95;O95394;O95394-3;O95394-4;H0Y8I3;D6RIS6;H0Y987;D6RCQ8;D6RF77	A0A087WT27;J3KN95;O95394;O95394-3;O95394-4	-0.936628	-0.418305	-0.0970906	-0.493266					0.762597	0.631158	0.529383	0.702036	-0.844584	-0.901614	NaN	NaN	NaN	-0.711098	NaN	NaN	0	0	1	1	0	0	0	1	1	1	4	2	0	0	0	1
PGM5	Phosphoglucomutase-like protein 5	Q15124;Q15124-2	Q15124;Q15124-2	2.70248	-0.359996	-0.0970906	0	+				0.0195997	0.613417	0.529383	0.5	NaN	-0.463892	NaN	NaN	-1.75839	NaN	NaN	NaN	2	2	0	0	0	0	0	0	0	0	0	0	0	0	0	0
PGRMC2	Membrane-associated progesterone receptor component 2	O15173;O15173-2;U3KQM0	O15173;O15173-2	-0.297519	-0.913374	-0.0691062	0.164753					0.589795	0.767704	0.520923	0.429711	-0.912259	-0.727597	-0.451604	-0.104275	-0.340352	NaN	NaN	0.411603	0	1	1	0	0	1	1	2	0	0	1	0	0	1	0	1
PGS1	CDP-diacylglycerol--glycerol-3-phosphate 3-phosphatidyltransferase, mitochondrial	Q32NB8-3;K7EL44;Q32NB8-2;Q32NB8;K7ELT9;Q32NB8-4;K7EQF5;U3KQD9	Q32NB8-3;K7EL44;Q32NB8-2;Q32NB8;K7ELT9	3.02011	3.33485	-0.0970906	0.566704	+	+			0.0105987	0.00379145	0.529383	0.271193	NaN	NaN	NaN	NaN	-0.963574	-0.815268	NaN	NaN	2	3	4	2	0	0	0	1	0	0	0	0	0	0	0	0
PHB	Prohibitin	P35232;C9JZ20;E7ESE2;E9PCW0;C9JW96;P35232-2;D6RBK0	P35232;C9JZ20;E7ESE2;E9PCW0;C9JW96;P35232-2	-2.48617	-1.16049	-0.681145	-1.58573					0.971088	0.823598	0.697484	0.955872	-0.0490196	-0.238902	NaN	-0.165721	-0.177953	-0.154469	NaN	0.0511213	2	5	6	3	0	0	1	2	3	6	8	5	0	2	2	2
PHB2	Prohibitin-2	J3KPX7;Q99623;F5GY37;Q99623-2;F5GWA7;F5H3X6;F5H0C5;F5H2D2;U3KPZ5	J3KPX7;Q99623;F5GY37;Q99623-2;F5GWA7;F5H3X6	-0.633633	-0.404393	-1.42065	0.566704					0.685624	0.626949	0.859632	0.271193	-0.135872	-0.107417	NaN	-0.166895	0.155973	-0.0294131	NaN	NaN	3	8	6	4	0	0	0	1	3	12	8	2	1	0	1	1
PHF3	PHD finger protein 3	E7EVH3;Q92576-2;Q92576;D6R9X2;E9PE34;B3KP41;E7ER40	E7EVH3;Q92576-2;Q92576;D6R9X2;E9PE34;B3KP41;E7ER40	0.280273	0.640004	2.20834	1.60299			+	+	0.415329	0.304175	0.0467959	0.0424238	NaN	NaN	NaN	NaN	NaN	NaN	0.414942	-0.391121	0	1	1	1	3	3	2	1	0	0	0	0	0	0	0	0
PHF5A	PHD finger-like domain-containing protein 5A	Q7RTV0	Q7RTV0	1.29458	0.49454	1.62247	1.84572				+	0.161623	0.346067	0.108991	0.0236191	0.214475	0.299326	0.00932654	0.2592	NaN	0.485345	-0.0522887	0.0694486	1	1	5	3	2	2	4	1	0	0	2	4	1	1	0	1
PHGDH	D-3-phosphoglycerate dehydrogenase	O43175;Q5SZU1	O43175;Q5SZU1	-0.866253	-1.27435	-2.86235	-2.90314					0.745688	0.846213	0.985122	0.999098	0.812168	0.632672	-0.89565	0.991951	0.692385	0.644824	-0.808597	1.0599	8	7	10	8	2	4	2	2	9	9	9	10	5	8	6	8
PHPT1	14 kDa phosphohistidine phosphatase	Q9NRX4;Q9NRX4-2	Q9NRX4;Q9NRX4-2	-0.131304	0.748953	1.48787	0.795628					0.539903	0.274366	0.129299	0.196191	-1.08402	-0.839485	NaN	-0.686229	-1.12843	-0.733726	-0.415427	NaN	2	2	3	2	2	2	0	1	2	1	2	1	1	1	0	2
PICALM	Phosphatidylinositol-binding clathrin assembly protein	Q13492-3;Q13492-2;Q13492-5;Q13492;Q13492-4;E9PKP6;E9PI56;E9PLJ8;E9PK13;E9PJT1;E5RFU0;E5RHK9;E5RFC6;E5RK51;E5RIJ5;E5RGY9;O60641-3;O60641-4;E9PDG8;O60641;H0YCY1;H0YEF7;H0YEH1	Q13492-3;Q13492-2;Q13492-5;Q13492;Q13492-4	0.647061	-0.29759	1.05703	-0.860174					0.310748	0.594164	0.211108	0.822437	-0.378837	-0.107864	-0.360529	0.216104	-0.289119	0.0855802	0.686998	NaN	3	4	6	5	3	3	1	1	2	2	6	4	0	4	1	3
PIGR	Polymeric immunoglobulin receptor;Secretory component	P01833	P01833	-3.13163	-0.359996	-0.863283	0					0.991565	0.613417	0.743918	0.5	NaN	NaN	NaN	NaN	NaN	NaN	NaN	NaN	0	0	0	0	1	0	0	0	4	0	0	0	2	0	0	0
PIN1	Peptidyl-prolyl cis-trans isomerase NIMA-interacting 1	Q13526;K7EN45;K7EMU7;O15428	Q13526;K7EN45;K7EMU7	1.28027	1.91771	0.31704	1.81773				+	0.164311	0.0623374	0.404886	0.0253462	0.203505	0.142318	-0.143772	-0.194628	0.0268065	0.317953	-0.269019	0.32068	2	2	3	1	2	2	2	1	0	1	0	0	1	1	0	1
PIP	Prolactin-inducible protein	P12273	P12273	-1.64072	-0.799434	-0.278069	-1.37943					0.894702	0.738939	0.583608	0.930948	NaN	NaN	NaN	NaN	NaN	NaN	NaN	NaN	0	1	1	1	2	4	0	1	3	0	2	1	3	2	0	2
PKM	Pyruvate kinase PKM;Pyruvate kinase	P14618;P14618-3;B4DNK4;H3BQ34;H3BUW1;H3BTJ2;H3BT25;H3BU13;H3BN34;H3BQZ3;P30613-2;P30613	P14618;P14618-3;B4DNK4;H3BQ34	0.070747	-0.122838	0.539474	0.376749					0.478475	0.539174	0.341046	0.342736	0.159887	-0.0455943	0.0822405	0.143526	0.0990679	-0.0339211	0.208135	0.146658	37	33	33	33	36	35	34	36	34	34	34	32	33	33	28	33
PKM	Pyruvate kinase PKM;Pyruvate kinase	P14618-2;H3BTN5;H3BR70	P14618-2;H3BTN5;H3BR70	0.280273	1.36433	1.27321	1.53618				+	0.415329	0.137334	0.166841	0.0493288	-0.426896	-0.745602	-0.0627892	-0.127309	NaN	-0.957159	0.00659582	-0.144369	0	1	2	2	1	2	1	3	0	0	1	0	1	1	0	1
PKP4	Plakophilin-4	Q99569-2;Q99569;A0A0D9SF60;H0YFB1;E7EST6	Q99569-2;Q99569;A0A0D9SF60	3.02011	4.72319	4.68665	4.58042	+	+	+	+	0.0105987	7.79e-05	0.000186512	4.24e-07	NaN	NaN	NaN	NaN	-0.433296	-0.0698088	-1.46327	1.29914	4	3	9	7	12	5	6	9	0	0	0	0	0	0	0	0
PLAA	Phospholipase A-2-activating protein	Q9Y263;E5RIM3;H0YBW4;H0YAU9	Q9Y263;E5RIM3	2.28027	1.88357	1.27321	0	+				0.0409358	0.0657627	0.166841	0.5	-0.110212	-0.271051	0.31892	-0.353835	1.60835	-0.369872	0.12568	NaN	2	2	2	2	2	2	0	0	0	2	1	1	0	1	0	0
PLBD2	Putative phospholipase B-like 2;Putative phospholipase B-like 2 32 kDa form;Putative phospholipase B-like 2 45 kDa form	Q8NHP8;Q8NHP8-2	Q8NHP8;Q8NHP8-2	-1.1313	0.0928217	-0.0970906	-1.85221					0.805993	0.470378	0.529383	0.976767	NaN	NaN	NaN	NaN	-1.18132	-0.00724203	NaN	NaN	2	2	3	3	0	0	1	1	3	4	3	4	0	0	1	3
PLCG1	1-phosphatidylinositol 4,5-bisphosphate phosphodiesterase gamma-1	P19174;P19174-2;A0A0D9SEK2;M0QX77;V9GY71;V9GYH5;V9GY63	P19174;P19174-2	3.39464	3.73173	4.11458	2.29057	+	+	+	+	0.00479556	0.00140466	0.000891721	0.006901	NaN	0.0256853	-0.064719	0.169578	-0.297201	-0.0796305	-0.195944	0.202723	4	6	5	6	8	10	2	4	0	0	1	1	2	1	1	1
PLD3	Phospholipase D3	Q8IV08;M0QZI4;M0R3G9;M0R2W7;M0R1F7	Q8IV08;M0QZI4	-0.325965	-0.204888	-0.0970906	-0.493266					0.598212	0.565153	0.529383	0.702036	-2.16477	-1.99683	NaN	NaN	-1.92707	-2.30805	NaN	NaN	3	2	3	1	0	0	0	0	3	2	5	0	0	0	0	1
PLEC	Plectin	Q15149;Q15149-7;Q15149-9;Q15149-5;Q15149-6;Q15149-2;E9PMV1;H0YDN1;E9PKG0;E9PIA2;E9PQ28	Q15149;Q15149-7;Q15149-9;Q15149-5;Q15149-6;Q15149-2	0.103555	-0.102841	0.492543	0.241127					0.46851	0.532812	0.354211	0.397736	-0.706381	-0.795801	-0.337285	-0.835959	-0.98705	-0.802775	-0.358685	-0.736524	116	115	209	178	46	49	77	77	98	101	199	172	33	36	59	71
PLOD1	Procollagen-lysine,2-oxoglutarate 5-dioxygenase 1	Q02809;Q02809-2;Q5JXB7;Q5JXB8	Q02809;Q02809-2	-2.10219	-0.195744	-0.822976	-1.7029					0.945648	0.562269	0.733971	0.966422	-1.50402	-1.60419	-0.304104	-0.198108	-0.704966	-1.18512	-0.320803	-0.351899	0	2	8	5	3	3	2	4	2	5	6	5	4	3	5	8
PLOD2	Procollagen-lysine,2-oxoglutarate 5-dioxygenase 2	O00469;O00469-2;E7ETU9;O00469-3;C9JXZ0;F8WEW3	O00469;O00469-2;E7ETU9;O00469-3	-0.297519	-0.341843	-0.863283	-0.887219					0.589795	0.607843	0.743918	0.829899	-0.881081	-1.20559	-0.756996	0.710682	NaN	-1.50108	NaN	1.10697	0	0	3	0	1	0	0	2	0	1	2	0	1	0	0	3
PLOD3	Procollagen-lysine,2-oxoglutarate 5-dioxygenase 3	O60568;H7C2S8;H7C2V1;H7C2A8;C9JU11;H7C0B8;C9JIX5	O60568	-0.268326	-1.36342	1.31886	-1.1057					0.581113	0.862505	0.158322	0.882709	-1.0901	0.665539	NaN	NaN	-0.645627	-1.00213	-0.539916	0.226955	1	4	4	3	3	3	1	3	2	3	9	5	0	1	2	5
PLRG1	Pleiotropic regulator 1	O43660-2;O43660;H0YA24;D6RA26;H0YAA2;B7Z982	O43660-2;O43660	-0.297519	-0.359996	-1.02554	-1.47359					0.589795	0.613417	0.781913	0.943416	0.764165	0.667907	-0.045843	0.441499	NaN	NaN	0.185339	NaN	0	0	0	0	4	2	0	0	0	0	0	0	3	3	2	0
PLS3	Plastin-3	P13797-3;P13797-2;A0A0A0MSQ0;P13797;H7C4N2;U3KQI3;P13796;Q14651;Q5TBN3;C9JAM8	P13797-3;P13797-2;A0A0A0MSQ0;P13797	-0.344531	0.168324	-1.9025	-0.657237					0.603682	0.446396	0.925705	0.760072	-0.64564	-0.202279	-0.335955	0.512317	-1.16125	-0.269233	NaN	NaN	1	2	6	3	0	1	0	2	1	2	5	3	1	1	0	3
PML	Protein PML	P29590-11;P29590;P29590-4;H3BT57;P29590-12;P29590-2;P29590-5;P29590-9;P29590-13;P29590-3;P29590-8;P29590-14;P29590-10;H3BUJ5;H3BT29;H3BVD2;H3BRN3	P29590-11;P29590;P29590-4;H3BT57;P29590-12;P29590-2;P29590-5;P29590-9;P29590-13;P29590-3;P29590-8;P29590-14;P29590-10;H3BUJ5;H3BT29	1.381	1.20057	-0.125592	-0.585729					0.145998	0.168213	0.537985	0.735542	-0.0955214	0.35134	-0.091418	0.218313	-0.0922479	-0.0943324	-0.00476943	NaN	3	2	2	1	2	1	0	1	1	1	0	1	1	1	0	1
POF1B	Protein POF1B	Q8WVV4;Q8WVV4-1;Q8WVV4-3	Q8WVV4;Q8WVV4-1	-0.297519	-1.36	-1.68296	2.21165				+	0.589795	0.861901	0.899346	0.00871433	NaN	NaN	-5.43843	NaN	NaN	NaN	NaN	NaN	0	0	0	0	0	0	4	0	0	0	1	1	1	1	0	0
POLD1	DNA polymerase delta catalytic subunit;DNA polymerase	P28340;M0R2B7;M0QZR8;M0QXE6;M0QXQ2;M0QZB4;M0R3H8	P28340;M0R2B7;M0QZR8	1.01148	1.33147	0.943336	0					0.220119	0.143198	0.236917	0.5	0.980718	1.03798	0.0485385	1.05743	2.17833	1.65452	-0.0133037	NaN	0	2	6	4	1	3	0	0	0	1	1	2	2	1	0	0
POLDIP2	Polymerase delta-interacting protein 2	Q9Y2S7;B4DEM9	Q9Y2S7;B4DEM9	-0.297519	1.39456	4.25965	3			+	+	0.589795	0.132088	0.000609791	0.000629825	NaN	NaN	NaN	NaN	NaN	-1.06737	-0.254734	-1.14675	0	0	2	0	8	7	3	3	0	0	0	0	0	1	0	1
POLR1A	DNA-directed RNA polymerase;DNA-directed RNA polymerase I subunit RPA1	B9ZVN9;O95602	B9ZVN9;O95602	2.86524	1.91771	3.02655	2.5667	+		+	+	0.0143978	0.0623374	0.0107811	0.00289696	NaN	NaN	0.442568	NaN	1.23478	0.723738	0.188269	-0.10975	1	1	1	1	1	1	1	2	0	0	0	0	0	0	0	0
POLR2A	DNA-directed RNA polymerase II subunit RPB1	P24928;A0A0C4DGZ0;A0A087WWE2;P24928-2	P24928;A0A0C4DGZ0;A0A087WWE2	0.280273	2.64	1.65047	0		+			0.415329	0.0172679	0.105072	0.5	0.280835	0.572972	NaN	NaN	NaN	0.410175	-0.212125	NaN	0	1	2	2	2	0	0	0	0	0	1	0	0	0	0	0
POLR2B	DNA-directed RNA polymerase;DNA-directed RNA polymerase II subunit RPB2	C9J2Y9;P30876;C9J4M6	C9J2Y9;P30876;C9J4M6	2.49141	0.941923	3.75238	3.18796	+		+	+	0.028649	0.225375	0.00219213	0.000305066	0.278679	0.165025	-0.169055	-0.230996	0.254092	0.118586	-0.0710759	-0.961594	2	6	5	6	9	8	3	1	1	2	6	4	1	3	0	1
POLR2H	DNA-directed RNA polymerases I, II, and III subunit RPABC3	C9JLU1;P52434;P52434-3;P52434-2;P52434-4;P52434-5	C9JLU1;P52434;P52434-3;P52434-2;P52434-4	2.51302	0.100368	0.902002	-0.973038	+				0.027586	0.467975	0.246713	0.852225	0.710114	0.648902	-0.00706487	0.56922	0.918536	0.545911	0.10713	0.67029	2	2	2	3	2	2	1	1	1	1	1	3	1	1	1	1
POP1	Ribonucleases P/MRP protein subunit POP1	Q99575;E5RK39	Q99575	0.765876	1.08663	-0.246963	0.0734376					0.279479	0.192144	0.574371	0.468538	0.26185	0.285587	0.396021	-0.125492	-0.733961	0.52169	0.35026	NaN	1	1	1	2	4	4	1	1	0	1	1	0	3	2	0	1
POT1	Protection of telomeres protein 1	Q9NUX5;Q9NUX5-2;B7Z7M5;A8MTK3;Q5MJ34;Q5MJ35;V9GY10;Q5MJ33;V9GZ00;C9JPG9;V9GZ21;V9GYE6;H7C4C7;H7C0Z6;Q96NH3-5;A2A304	Q9NUX5;Q9NUX5-2;B7Z7M5;A8MTK3;Q5MJ34;Q5MJ35	6.77977	6.62239	6.87614	7.22226	+	+	+	+	1.15e-07	5.72e-08	8.9e-08	4.12e-15	NaN	NaN	NaN	NaN	0.746238	0.11968	-0.232218	0.144653	14	13	16	13	17	14	17	10	0	0	0	0	0	0	0	0
PPA1	Inorganic pyrophosphatase	Q15181;Q5SQT6	Q15181;Q5SQT6	0.280273	-0.232791	-0.681145	0					0.415329	0.57393	0.697484	0.5	0.626047	0.216636	NaN	NaN	NaN	0.149323	NaN	NaN	0	1	2	2	1	0	0	0	0	0	1	1	1	1	0	0
PPIA	Peptidyl-prolyl cis-trans isomerase A;Peptidyl-prolyl cis-trans isomerase A, N-terminally processed;Peptidyl-prolyl cis-trans isomerase	P62937;F8WE65;C9J5S7;P62937-2;Q9Y536;F5H284;A0A0B4J2A2;A0A075B767;A0A075B759;E5RIZ5;A2BFH1	P62937;F8WE65;C9J5S7;P62937-2	0.215381	0.0732413	0.366709	0.793231					0.43473	0.476619	0.390339	0.196905	-0.0060568	0.0548269	-0.154588	0.159333	0.116724	0.167038	-0.0947117	0.255344	11	10	10	9	9	8	8	7	11	11	10	10	7	8	5	6
PPIB	Peptidyl-prolyl cis-trans isomerase B	P23284	P23284	0.138554	0.0297541	0.262982	-0.000326285					0.457902	0.490497	0.420867	0.50014	-1.14711	-1.38679	-0.235598	-1.41715	-1.15797	-1.38121	-0.201593	-1.50494	11	10	12	10	8	10	10	11	10	10	10	9	9	8	9	13
PPIH	Peptidyl-prolyl cis-trans isomerase H;Peptidyl-prolyl cis-trans isomerase	O43447;C9JQD4;H0YEL5;O43447-2;A6NM32	O43447;C9JQD4;H0YEL5;O43447-2	1.17378	2.81797	1.31704	-0.493266		+			0.185224	0.0120274	0.158655	0.702036	0.873106	0.568187	-0.125897	NaN	0.913717	0.855531	-0.204091	NaN	2	2	1	1	2	3	0	0	0	1	0	1	1	1	0	1
PPIL1	Peptidyl-prolyl cis-trans isomerase-like 1	Q9Y3C6	Q9Y3C6	-1.06008	-1.4153	-0.096546	0.615509					0.790708	0.871432	0.529218	0.254089	NaN	NaN	NaN	NaN	NaN	NaN	-0.0848392	0.312983	1	1	1	0	2	2	0	2	1	1	1	1	2	3	0	2
PPME1	Protein phosphatase methylesterase 1	Q9Y570;Q9Y570-4;Q9Y570-2;Q9Y570-3	Q9Y570;Q9Y570-4;Q9Y570-2	0.494426	-0.352811	-0.0970906	0.566704					0.352989	0.611214	0.529383	0.271193	-0.107159	0.000493852	-0.548644	0.379133	0.409051	NaN	NaN	NaN	1	2	1	1	0	0	0	1	1	1	1	0	0	0	0	0
PPP1CA	Serine/threonine-protein phosphatase PP1-alpha catalytic subunit;Serine/threonine-protein phosphatase	P62136;P62136-2;P62136-3;E9PMD7;F5H1L6;F5H037	P62136;P62136-2;P62136-3;E9PMD7	1.15034	0.857259	0.953661	0.920952					0.190039	0.246237	0.234504	0.16108	-0.122435	-0.0705102	-0.215992	0.115682	0.0507448	0.229379	-0.071996	-0.0107679	12	11	14	13	11	10	8	9	9	9	13	12	7	6	4	8
PPP1CB	Serine/threonine-protein phosphatase PP1-beta catalytic subunit;Serine/threonine-protein phosphatase	P62140;E7ETD8;C9JP48;C9J9S3;F8WE71	P62140;E7ETD8;C9JP48;C9J9S3	2.28744	2.04672	2.14651	2.08464	+			+	0.0404577	0.0506337	0.0515716	0.0125132	-0.571443	-0.431677	-0.337337	0.00467607	-0.478141	-0.157446	-0.140531	0.114513	2	1	4	2	3	3	2	3	1	1	2	0	2	2	2	3
PPP1R10	Serine/threonine-protein phosphatase 1 regulatory subunit 10	Q96QC0	Q96QC0	6.95295	7.33796	7.39439	7.20522	+	+	+	+	5.62e-08	2.11e-09	9.86e-09	4.75e-15	1.14068	0.661251	-0.224641	NaN	0.923413	0.861394	0.324716	-0.51253	17	15	20	15	15	14	13	12	0	1	1	1	0	1	0	0
PPP1R12A	Protein phosphatase 1 regulatory subunit 12A	O14974;O14974-5;O14974-4;O14974-3;O14974-2;F8VZN8;H0YHI8;H0YIS4;H0YIM2;H0YIS3;F8VW28;H0YIL7;H0YHL8	O14974;O14974-5;O14974-4;O14974-3;O14974-2;F8VZN8;H0YHI8	1.29458	2.37544	1.17478	1		+			0.161623	0.0285902	0.1862	0.141186	-0.494081	-0.514457	-0.626284	-0.217767	-0.700872	-0.557493	0.119582	NaN	5	4	7	7	2	0	1	1	3	2	4	2	0	0	0	0
PPP2CA;PPP2CB	Serine/threonine-protein phosphatase 2A catalytic subunit alpha isoform;Serine/threonine-protein phosphatase 2A catalytic subunit beta isoform	P67775;P62714;P67775-2;H0YC23;E5RHC1;H0YBN9;E5RFI3;E5RHP4;E7ESG8;H3BV22;H3BTA2	P67775;P62714;P67775-2	0.28774	0.857346	0.709584	0.0916961					0.413109	0.246215	0.295022	0.460738	0.25788	0.295205	-0.00323711	0.325273	0.32417	0.310102	-0.150805	-0.0174533	2	2	4	3	3	2	2	2	1	2	2	2	2	3	1	1
PPP2R1A	Serine/threonine-protein phosphatase 2A 65 kDa regulatory subunit A alpha isoform	P30153;B3KQV6;C9J9C1;E9PH38;P30154-4;P30154;P30154-2;P30154-5;P30154-3;E9PPI5;E9PHZ6;H0YDG7;M0QXG4;M0R0K6;E9PNM7	P30153;B3KQV6	2.60507	0.690059	-0.0970906	0	+				0.023419	0.290301	0.529383	0.5	-0.095288	0.0539025	-0.0456278	0.23651	0.177793	-0.0568234	NaN	NaN	5	4	9	3	1	1	0	1	1	1	4	3	0	0	1	2
PPP2R2A	Serine/threonine-protein phosphatase 2A 55 kDa regulatory subunit B alpha isoform	P63151;P63151-2;E5RFR9;Q9Y2T4-3;Q00005-6;Q9Y2T4-4;Q00005;Q00005-2;Q9Y2T4-2;Q9Y2T4;Q00005-3;Q66LE6;Q00005-4;Q00005-5;Q00005-7;E5RIY1	P63151;P63151-2	-0.273676	-0.206292	-0.419019	-1.60319					0.582707	0.565595	0.624815	0.957595	-0.0414143	0.0382463	-0.0815999	0.0137554	-0.0981347	0.043354	-0.0265008	0.490879	1	1	5	1	4	4	1	2	1	2	3	3	4	3	1	3
PPP3CA;PPP3CB	Serine/threonine-protein phosphatase 2B catalytic subunit alpha isoform;Serine/threonine-protein phosphatase;Serine/threonine-protein phosphatase 2B catalytic subunit beta isoform	Q08209-3;Q08209-2;Q08209;E7ETC2;Q08209-5;E9PPC8;E9PK68;Q5F2F8;P16298-2;P16298-3;P16298;P16298-4;Q08209-4;G3V111;P48454-2;P48454;P48454-3;E5RJH4;H0YB02;H0YB04;H0YC26	Q08209-3;Q08209-2;Q08209;E7ETC2;Q08209-5;E9PPC8;E9PK68;Q5F2F8;P16298-2;P16298-3;P16298;P16298-4	0.294579	2.87309	1.46028	0.795628		+			0.411077	0.0107132	0.133768	0.196191	-0.434119	-0.264989	-0.0517943	-0.278864	NaN	-0.0920132	0.113331	NaN	1	0	3	2	2	2	0	1	0	0	1	1	0	0	0	1
PRCP	Lysosomal Pro-X carboxypeptidase	E9PQB5;E9PL85;E9PQN3;E9PKN6;E9PIG4;P42785;P42785-2;E9PLY4;E9PNF7;E9PNJ1	E9PQB5;E9PL85;E9PQN3;E9PKN6;E9PIG4;P42785;P42785-2	-2.21851	-0.352811	-0.0970906	0					0.954753	0.611214	0.529383	0.5	NaN	NaN	NaN	NaN	NaN	NaN	NaN	NaN	0	0	1	0	0	0	0	0	3	0	1	0	0	0	0	0
PRDM10	PR domain zinc finger protein 10	Q9NQV6-2;Q9NQV6-1;Q9NQV6-5;E9PLV1;Q9NQV6;Q9NQV6-4;Q9NQV6-7;Q9NQV6-6;E9PRS0	Q9NQV6-2;Q9NQV6-1;Q9NQV6-5;E9PLV1;Q9NQV6;Q9NQV6-4;Q9NQV6-7;Q9NQV6-6;E9PRS0	1.01148	1.91771	-0.0970906	0					0.220119	0.0623374	0.529383	0.5	NaN	NaN	NaN	NaN	0.921462	0.502976	NaN	NaN	0	2	3	2	0	0	0	0	0	0	0	0	0	0	0	0
PRDX1	Peroxiredoxin-1	Q06830;A0A0A0MSI0;A0A0A0MRQ5	Q06830;A0A0A0MSI0;A0A0A0MRQ5	-0.275598	-0.198923	-0.00932275	-0.00846946					0.58328	0.563272	0.502824	0.503632	-0.572455	-0.490812	-0.219121	0.0222701	-0.51447	-0.405317	-0.218935	-0.069866	14	14	15	15	13	14	15	17	13	14	17	15	15	14	14	17
PRDX2	Peroxiredoxin-2	P32119;A6NIW5;P32119-2	P32119;A6NIW5	-0.434596	0.0630374	-0.138019	-0.349344					0.629909	0.479873	0.541731	0.646373	-0.313434	-0.297372	0.119696	-0.049583	-0.298857	-0.231532	0.0920562	-0.0838955	9	10	11	9	9	10	7	9	9	10	10	10	9	10	8	10
PRDX3	Thioredoxin-dependent peroxide reductase, mitochondrial	P30048-2;P30048	P30048-2;P30048	-0.500544	-0.0858615	-1.50675	-0.442438					0.648744	0.527404	0.873696	0.682829	0.253222	0.116604	-0.0785645	0.236519	0.156671	0.0472176	-0.0955849	0.286562	5	5	5	5	5	4	4	4	4	5	6	5	5	5	5	5
PRDX4	Peroxiredoxin-4	Q13162;H7C3T4;A6NJJ0;A6NG45	Q13162;H7C3T4	-0.274412	-0.212268	-0.207728	-0.250972					0.582927	0.567478	0.562663	0.606342	-0.406121	-1.52429	-0.4164	-1.18501	-1.39537	-1.5271	-0.437739	-1.24067	10	10	13	13	10	11	10	12	11	10	13	13	11	12	12	12
PRDX5	Peroxiredoxin-5, mitochondrial	P30044-2;P30044;P30044-3;P30044-4	P30044-2;P30044;P30044-3;P30044-4	0.0922969	0.38855	0.51631	1.53112				+	0.471927	0.377863	0.34752	0.0498854	-0.61235	-0.662988	-0.317498	-0.318314	-0.531095	-0.662664	-0.143598	-0.293286	5	7	8	8	3	4	4	4	5	6	8	6	1	2	1	3
PRDX6	Peroxiredoxin-6	P30041	P30041	0.44686	0.240292	0.282976	0.0732428					0.366563	0.423717	0.414939	0.468621	-0.569084	-0.530995	-0.231372	0.101982	-0.598206	-0.448842	-0.24711	0.0530867	12	12	16	12	7	8	11	13	10	10	13	10	5	7	9	14
PRKAA1	5-AMP-activated protein kinase catalytic subunit alpha-1	Q13131;Q13131-2;Q96E92	Q13131;Q13131-2	0.0372278	0.301839	-0.0970906	1					0.488669	0.404517	0.529383	0.141186	-0.660651	-0.694132	-0.490432	-0.46856	NaN	0.000133921	NaN	NaN	1	1	4	1	0	0	1	1	1	1	1	1	0	0	0	1
PRKACA;KIN27	cAMP-dependent protein kinase catalytic subunit alpha	P17612-2;P17612;P22694-10;Q15136;K7ERP6;P22612	P17612-2;P17612;P22694-10;Q15136;K7ERP6	-0.76768	0.0826616	0.514948	-0.870594					0.720984	0.473616	0.347903	0.825336	-0.599547	-0.352139	NaN	-0.226215	-0.85031	-0.211891	NaN	NaN	2	1	4	3	0	1	1	0	1	2	4	2	0	0	1	1
PRKAG1	5-AMP-activated protein kinase subunit gamma-1	P54619-2;P54619;P54619-3;F8VYY9;H0YIC9;H0YHF8;F8VVA3;F8VZX1;F8VSH3;F8VRY2;F8VSL2;F8VPF5;Q9UGJ0-2;E9PGP6;Q9UGJ0-3;Q9UGJ0	P54619-2;P54619;P54619-3;F8VYY9;H0YIC9;H0YHF8	-0.439009	-1.70957	-0.68296	0.111499					0.63118	0.914468	0.697965	0.452296	-0.519306	-0.737512	-0.412091	-0.338509	-0.568304	-0.66849	NaN	-0.601329	2	2	3	3	1	1	1	1	3	3	8	4	3	2	1	4
PRKCA	Protein kinase C alpha type	P17252;J3KRN5;P05771;P05771-2;I3L148;H3BV73;J3KN97;P05129-2;P05129	P17252	-1.1234	0.301839	-0.860016	2.21165				+	0.80433	0.404517	0.743119	0.00871433	-0.744047	-0.802572	-0.812655	-0.129439	NaN	NaN	NaN	-0.058806	1	0	2	0	1	1	3	0	1	0	0	1	0	2	1	1
PRKCDBP	Protein kinase C delta-binding protein	Q969G5;E9PIE3	Q969G5;E9PIE3	-0.950165	-1.15175	-3.68296	-3.71342					0.765777	0.821778	0.997416	0.999967	-1.71579	-2.29368	-1.10335	-0.997366	-1.88213	-2.58763	NaN	NaN	6	2	6	5	0	0	1	0	7	4	7	7	3	3	5	5
PRKDC	DNA-dependent protein kinase catalytic subunit	P78527;P78527-2;F5GX40;H0YG84	P78527;P78527-2	0.28932	0.182988	0.662106	0.84448					0.412639	0.441758	0.30758	0.181987	0.780062	0.782772	0.0153918	0.458594	0.684729	0.872205	0.066188	0.374249	93	90	130	108	90	84	72	74	61	75	110	91	49	66	40	57
PRKRA	Interferon-inducible double stranded RNA-dependent protein kinase activator A	O75569;O75569-3;O75569-2;G5E9Q4;F8WEG8;C9JMM3	O75569;O75569-3;O75569-2;G5E9Q4	-0.826222	0.84118	-0.681145	0.566704					0.735795	0.250313	0.697484	0.271193	-0.505646	-0.43233	-0.377379	-0.274601	NaN	0.0162535	NaN	NaN	0	0	3	0	0	0	0	1	0	1	1	0	0	1	0	0
PRMT1	Protein arginine N-methyltransferase 1	E9PKG1;Q99873-3;Q99873-2;Q99873-4;Q99873;H7C2I1;E9PIX6;E9PQ98;A0A087X1W2;H0YDE4;E9PNR9;E9PMW9;E9PI83;Q9NR22-2;Q9NR22;E9PMZ2	E9PKG1;Q99873-3;Q99873-2;Q99873-4;Q99873;H7C2I1;E9PIX6;E9PQ98;A0A087X1W2;H0YDE4;E9PNR9	0.608967	0.134579	0.0687659	0.169832					0.321086	0.457096	0.47918	0.427567	0.250777	0.339844	0.187873	-0.602989	-0.0492986	0.34688	0.184471	-0.77137	12	15	15	13	15	13	14	12	11	11	15	12	15	14	13	11
PRMT5	Protein arginine N-methyltransferase 5;Protein arginine N-methyltransferase 5, N-terminally processed	O14744;O14744-5;O14744-2;O14744-3;G3V580;O14744-4;G3V5L5;G3V2X6;H0YJX6;G3V2L6;C9JSX3;H0YJ77;H0YJD3;G3V507;H0YJY6;G3V2F5;G3V5T6;H7BZ44	O14744;O14744-5;O14744-2;O14744-3;G3V580;O14744-4	-3.88248	-1.93908	-0.525449	-0.66835					0.998474	0.939735	0.655039	0.76377	0.133242	0.0370546	0.183626	-0.0194589	NaN	0.270604	0.215018	0.0362153	0	0	2	4	3	1	3	3	2	2	3	3	3	5	4	2
PRPF19	Pre-mRNA-processing factor 19	Q9UMS4;F5GY56;F5H2I0;H0YGF3;H0YGZ5	Q9UMS4;F5GY56	0.812047	-0.00920017	0.0436328	0.677491					0.267754	0.502939	0.486786	0.233213	0.892313	0.796763	0.0493107	0.622289	0.774297	0.793365	0.113097	0.486092	7	7	7	6	8	7	6	5	4	7	7	7	8	7	5	5
PRPF3	U4/U6 small nuclear ribonucleoprotein Prp3	O43395;O43395-3	O43395	1.01148	0.640004	1.06642	0.602993					0.220119	0.304175	0.209054	0.258421	0.283913	-0.131309	0.0158896	0.709056	0.854198	-0.936775	-0.166497	NaN	0	2	1	1	3	0	1	0	0	0	1	1	1	1	0	0
PRPF4	U4/U6 small nuclear ribonucleoprotein Prp4	O43172-2;O43172	O43172-2;O43172	0.855316	1.03179	1.65047	0.506734					0.256995	0.204369	0.105072	0.292966	0.680986	0.486762	0.111661	0.507857	1.5119	0.529694	0.312144	0.441348	0	2	6	4	2	1	1	1	1	0	3	2	0	0	1	1
PRPF40A	Pre-mRNA-processing factor 40 homolog A	O75400-2;O75400-3;O75400;F5H578	O75400-2;O75400-3;O75400	2.29458	0.452515	2.48787	2.79956	+		+	+	0.0399864	0.358559	0.0294468	0.00130821	0.526379	0.463257	0.0198225	0.421418	0.371228	0.491853	0.0961762	0.462816	4	3	6	5	1	3	2	3	1	3	5	4	0	0	1	1
PRPF6	Pre-mRNA-processing factor 6	O94906;O94906-2	O94906;O94906-2	0.280273	0.0498697	-0.123777	0					0.415329	0.484075	0.537438	0.5	0.667985	0.428524	0.0342757	0.0641714	NaN	0.0082712	-0.661921	NaN	1	1	2	2	3	0	0	0	0	0	2	1	0	1	0	0
PRPF8	Pre-mRNA-processing-splicing factor 8	Q6P2Q9;I3L0J9;I3L3Z8;I3L1T8	Q6P2Q9	-0.737721	-0.604815	-0.615949	-0.37597					0.713251	0.685897	0.679992	0.656956	0.647993	0.513335	0.0190723	0.394275	0.440869	0.524373	0.0213752	0.236992	17	21	20	22	41	39	25	14	22	25	27	25	42	43	27	18
PRPS1;PRPS1L1	Ribose-phosphate pyrophosphokinase 1;Ribose-phosphate pyrophosphokinase 3	P60891;B1ALA9;P60891-2;P21108;A0A0B4J207;B7ZB02;B1ALA7	P60891;B1ALA9;P60891-2;P21108;A0A0B4J207	-0.877539	0.568232	0.460278	-0.863539					0.748441	0.324568	0.363365	0.823376	-0.379944	2.36794	2.21946	-0.0588076	-0.36523	-0.333583	NaN	0.241139	2	1	3	4	1	0	0	2	1	2	3	2	1	0	1	2
PSAP	Proactivator polypeptide;Saposin-A;Saposin-B-Val;Saposin-B;Saposin-C;Saposin-D	P07602;P07602-2;P07602-3;C9JIZ6;Q5BJH1	P07602;P07602-2;P07602-3;C9JIZ6	-0.516546	-0.346857	-0.0970906	0					0.653262	0.609385	0.529383	0.5	-1.10433	-1.65096	NaN	NaN	-1.60795	NaN	NaN	NaN	1	1	2	0	0	0	0	0	1	2	2	0	0	0	0	0
PSAT1	Phosphoserine aminotransferase	Q9Y617-2;Q9Y617	Q9Y617-2;Q9Y617	-0.297519	0.33868	-0.0970906	-0.493266					0.589795	0.39313	0.529383	0.702036	0.707057	0.651974	-0.795559	1.29511	NaN	0.484579	NaN	NaN	0	0	3	1	0	0	0	0	0	0	3	0	1	0	0	2
PSIP1	PC4 and SFRS1-interacting protein	O75475;O75475-3;O75475-2;V9GYT7	O75475;O75475-3;O75475-2	1.70248	1.7146	1.90291	0.506734					0.096963	0.084904	0.0742517	0.292966	1.75019	1.68135	-0.290949	1.15881	0.0605569	1.39152	0.334229	NaN	1	1	3	3	2	1	1	1	0	0	3	2	1	1	0	1
PSMA1	Proteasome subunit alpha type-1;Proteasome subunit alpha type	P25786;P25786-2;F5GX11;B4DEV8;F5H112	P25786;P25786-2;F5GX11;B4DEV8	0.4523	-0.664986	0.231202	-0.05771					0.365002	0.702786	0.430325	0.524734	0.17327	0.027213	0.0849378	0.0320395	0	0.0357005	0.00284406	-0.0513802	3	4	6	4	3	3	2	4	3	5	5	5	3	2	2	5
PSMA2	Proteasome subunit alpha type-2	P25787;C9JCK5;H3BT36;H7C402	P25787;C9JCK5	-0.993858	-0.221072	-0.123777	-1.58573					0.775879	0.570248	0.537438	0.955872	0.133995	-0.0682731	0.160498	-0.00120535	-0.116959	-0.0557254	NaN	NaN	2	3	3	3	1	0	0	1	3	4	5	3	1	1	1	3
PSMA3	Proteasome subunit alpha type-3	P25788-2;P25788;G3V4X5;G3V3W4;G3V5N4;H0YJ03	P25788-2;P25788;G3V4X5	0.0706819	-0.25626	0.400547	0.300377					0.478494	0.581284	0.380516	0.373383	0.106768	-0.00946064	0.139878	0.0633913	0.0250478	-0.0153668	-0.0886714	0.0157787	4	3	7	6	3	4	2	5	3	5	6	7	2	2	3	4
PSMA4	Proteasome subunit alpha type-4;Proteasome subunit alpha type;Proteasome subunit beta type	P25789;H0YN18;P25789-2;H0YMZ1;H0YL69;H0YMA1;H0YLC2;H0YKT8;H0YMI6;H0YKS0;H0YMV3;H0YLS6	P25789;H0YN18;P25789-2;H0YMZ1;H0YL69;H0YMA1;H0YLC2;H0YKT8;H0YMI6	-0.587394	0.204009	-0.0237126	-0.764871					0.672996	0.435124	0.507182	0.79453	0.0121119	-0.00616967	0.0782616	-0.104005	-0.062475	0.0284524	0.119832	0.0112795	4	6	6	6	3	4	1	5	4	5	6	6	4	5	2	4
PSMA5	Proteasome subunit alpha type-5	P28066;P28066-2	P28066;P28066-2	-0.137806	-0.259196	-0.564264	-0.887219					0.541872	0.582202	0.665832	0.829899	0.242997	0.0103618	0.165239	0.0249502	0.0975665	0.0978777	0.268932	0.151397	4	4	8	6	2	2	1	4	3	4	7	5	1	4	0	2
PSMA6	Proteasome subunit alpha type-6;Proteasome subunit alpha type	P60900;G3V5Z7;G3V295;P60900-2;G3V3I1;P60900-3;G3V3U4;H0YJC4;G3V4S5;G3V2S7	P60900;G3V5Z7;G3V295;P60900-2;G3V3I1;P60900-3	-0.441061	-0.296536	0.165944	-0.41863					0.63177	0.593837	0.449867	0.673655	0.180214	-0.00899679	0.122464	0.0501509	0.0816165	-0.00590954	0.144064	0.113122	6	6	10	10	5	5	4	6	5	6	10	10	4	5	3	7
PSMA7	Proteasome subunit alpha type-7	O14818;O14818-2;H0Y586;O14818-4;Q8TAA3-2;Q8TAA3-5;Q8TAA3;A0A087WYS6;F5GY34	O14818;O14818-2;H0Y586	-0.606491	-0.122372	-0.14633	-0.508886					0.678237	0.539025	0.544233	0.70783	0.266682	0.0626112	0.212709	0.0472677	0.0991349	0.107977	0.104446	-0.294231	4	2	7	8	6	6	6	6	4	6	8	7	6	7	5	9
PSMB1	Proteasome subunit beta type-1	P20618	P20618	0.542997	-0.541357	-0.102783	0.322537					0.339318	0.667655	0.531102	0.364397	0.106244	0.0168168	0.0529171	-0.0067728	0.185848	-0.00316393	0.135799	-0.0293065	5	6	5	4	4	4	2	7	2	5	7	5	4	5	1	5
PSMB2	Proteasome subunit beta type-2	P49721;A0A087WVV1	P49721;A0A087WVV1	0.238421	0.265702	1.65528	0.45056					0.427821	0.415765	0.10441	0.314067	0.211864	-0.0550769	-0.0353438	-0.162033	0.200952	0.0173754	0.227188	NaN	4	4	2	4	2	2	1	1	2	3	3	2	1	1	0	1
PSMB3	Proteasome subunit beta type-3	P49720;A0A087WUL2;A0A087WXQ8;A0A087WY10	P49720;A0A087WUL2;A0A087WXQ8;A0A087WY10	0.775225	-0.102244	0.165399	-0.82864					0.277085	0.532622	0.450031	0.81348	0.0504555	-0.0408719	0.104092	0.00949857	-0.173083	-0.030639	-0.100018	0.187261	3	3	3	4	2	1	1	2	1	3	3	3	2	1	1	2
PSMB4	Proteasome subunit beta type-4	P28070	P28070	0.713967	-0.219327	-0.0798759	0.155303					0.292952	0.569699	0.52418	0.433704	0.120287	NaN	0.139892	-0.00892647	0.0614717	0.0112539	0.124319	0.177265	2	4	3	4	3	4	3	4	1	3	4	3	3	3	4	5
PSMB5	Proteasome subunit beta type-5	P28074;P28074-3;H0YJM8;P28074-2	P28074;P28074-3	0.529469	-0.437815	0.116802	-0.191068					0.343105	0.637034	0.464666	0.58137	-0.0683436	-0.185189	-0.0379923	-0.0548767	-0.13196	-0.129729	-0.083128	-0.112617	6	7	6	6	6	6	8	6	2	4	8	6	6	6	5	7
PSMB6	Proteasome subunit beta type-6	P28072;I3L3X7;A0A087X2I4	P28072	-0.585955	-1.00907	-0.0635367	-0.530018					0.6726	0.790433	0.519238	0.715584	0.186145	-0.16585	0.0885048	-0.0363258	1.44258	-0.0290418	-0.0127801	0.0578599	3	3	2	2	2	2	1	2	2	3	4	3	4	4	2	3
PSMC1	26S protease regulatory subunit 4	P62191;P62191-2	P62191;P62191-2	0.105344	-1.43789	-0.0970906	-0.571279					0.467967	0.875189	0.529383	0.730435	0.109924	-0.101942	-0.187186	0.0948053	-0.112988	-0.236945	NaN	NaN	2	4	3	3	0	0	0	1	2	3	5	3	0	0	1	2
PSMC2	26S protease regulatory subunit 7	P35998;P35998-2;C9JLS9	P35998;P35998-2	-0.0219364	-0.460344	-0.108463	-0.72434					0.506677	0.64378	0.532817	0.781913	0.0336414	-0.170974	-0.019757	0.0338293	0.225564	-0.144391	0.00297573	-0.132472	2	4	6	4	4	4	4	5	3	3	6	6	2	3	2	4
PSMC3	26S protease regulatory subunit 6A	R4GNH3;E9PKD5;E9PM69;P17980;E9PMD8;E9PN50;E9PLG2	R4GNH3;E9PKD5;E9PM69;P17980;E9PMD8;E9PN50	0.352277	0.103781	-0.0970906	-0.835246					0.394042	0.466888	0.529383	0.815379	0.032008	-0.094114	-0.0846663	0.11366	0.10829	-0.246163	NaN	0.840684	2	2	4	4	0	0	0	1	2	2	5	2	0	0	1	2
PSMC4	26S protease regulatory subunit 6B	P43686-2;P43686	P43686-2;P43686	-0.514529	0.81667	-0.0970906	-0.493266					0.652694	0.256595	0.529383	0.702036	-0.0417673	-0.152216	0.123143	-0.109391	-0.095497	-0.203695	NaN	NaN	5	3	4	4	0	0	1	0	3	4	5	4	0	0	1	1
PSMC5	26S protease regulatory subunit 8	P62195-2;P62195;J3QQM1;J3QLH6;J3KRP2;J3QSA9;J3QRR3;J3QRW1;J3QSE0;Q8NB90-3;Q8NB90-2;Q8NB90	P62195-2;P62195;J3QQM1;J3QLH6;J3KRP2;J3QSA9;J3QRR3;J3QRW1	-0.388869	-0.345872	-0.417384	-0.603802					0.61666	0.609082	0.624344	0.74186	0.0713673	-0.130667	-0.0246353	-0.046686	-0.0357074	-0.130354	-0.0109384	-0.134344	3	3	5	4	2	2	2	3	2	3	6	3	1	2	3	3
PSMC6	26S protease regulatory subunit 10B	P62333;A0A087X2I1;H0YJC0;H0YJS8;H0YJX2;H0YJE9;H0YJT1	P62333;A0A087X2I1	-1.27826	-0.0414125	-1.8622	-0.775109					0.835308	0.513226	0.921308	0.797647	0.00172513	-0.206517	-0.0426357	-0.102125	-0.0402752	-0.287417	0.820617	-0.0822921	5	5	7	9	2	0	3	3	5	8	7	8	2	2	3	7
PSMD1	26S proteasome non-ATPase regulatory subunit 1	Q99460;A0A087WW66;Q99460-2;H7C378;C9J9M4;H7BZR6	Q99460;A0A087WW66;Q99460-2	-0.983429	-0.495583	-0.492305	0.21532					0.77349	0.654241	0.645722	0.408475	0.0415159	-0.125105	0.0175656	0.14945	-0.0977506	-0.183252	0.0762002	0.0275679	4	3	6	8	3	3	2	5	4	5	8	6	3	1	4	4
PSMD12	26S proteasome non-ATPase regulatory subunit 12	O00232;O00232-2	O00232;O00232-2	-1.51655	0.299986	-0.0970906	0					0.8764	0.405092	0.529383	0.5	0.10653	0.0217664	NaN	0.770047	NaN	-0.102934	NaN	NaN	0	0	3	1	0	0	0	0	0	1	2	2	0	0	0	0
PSMD14	26S proteasome non-ATPase regulatory subunit 14	O00487	O00487	0.173778	0.347219	0.31704	-0.571279					0.447256	0.390504	0.404886	0.730435	0.19471	0.121155	0.000233823	0.283198	0.06732	-0.0667916	NaN	0.229912	1	1	2	2	1	1	1	1	1	1	2	2	1	0	1	2
PSMD2	26S proteasome non-ATPase regulatory subunit 2	Q13200;Q13200-3;Q13200-2;H7C1H2;H7C2Q3;C9JPC0	Q13200;Q13200-3;Q13200-2	-0.0988261	-0.0662481	0.229918	-0.203848					0.530055	0.521151	0.430708	0.586729	0.124864	-0.0422233	0.153255	-0.00655135	-0.0200611	-0.106667	0.211258	-0.0566903	14	15	19	17	10	7	7	13	13	18	19	16	8	9	7	13
PSMD3	26S proteasome non-ATPase regulatory subunit 3	O43242;O43242-2;H0YGV8	O43242;O43242-2	0.636591	-1.24766	-0.52036	-1.44323					0.313575	0.841093	0.653615	0.939607	-0.166136	-0.161045	-0.0804266	0.20546	-0.140061	0.165075	0.0392043	-0.101893	1	1	2	2	3	4	2	2	0	1	3	3	2	3	3	5
PSMD5	26S proteasome non-ATPase regulatory subunit 5	Q16401;Q16401-2;F2Z3J2;Q4VXH0	Q16401;Q16401-2	-0.569516	0.509766	-0.0970906	0.602993					0.668059	0.341581	0.529383	0.258421	-0.737363	-0.61174	NaN	-0.756517	-0.77135	-0.650807	NaN	NaN	4	3	5	2	0	0	1	0	3	3	2	2	0	0	0	0
PSMD6	26S proteasome non-ATPase regulatory subunit 6	Q15008;Q15008-4;Q15008-3;Q15008-2;C9J0E9;H7C531;C9J7B7	Q15008;Q15008-4;Q15008-3;Q15008-2;C9J0E9	0.280273	-0.135558	-0.0970906	0					0.415329	0.543215	0.529383	0.5	-0.00889946	-0.186162	NaN	0.951818	NaN	-0.335678	NaN	NaN	0	1	2	1	0	0	0	0	0	0	2	1	0	0	0	0
PSMD7	26S proteasome non-ATPase regulatory subunit 7	P51665;H3BNT7;H3BTM8;H3BQV2	P51665;H3BNT7;H3BTM8	-0.516546	1.04768	-0.29046	-0.571279					0.653262	0.200778	0.587275	0.730435	0.220131	0.152975	-0.135407	0.441744	NaN	-0.000562532	NaN	NaN	1	1	4	4	1	1	0	1	0	1	2	2	0	1	1	2
PSMD8	26S proteasome non-ATPase regulatory subunit 8	K7EJR3;R4GMR5;P48556;K7EJC1;K7ERW6;K7ENY6	K7EJR3;R4GMR5;P48556;K7EJC1	1.01148	-1.13999	-0.0970906	0					0.220119	0.819312	0.529383	0.5	-0.0975047	0.152247	NaN	NaN	NaN	-0.153833	NaN	NaN	0	1	2	1	0	0	0	0	0	0	1	2	0	0	0	0
PSMG1	Proteasome assembly chaperone 1	O95456-2;O95456;F8WBH7	O95456-2;O95456;F8WBH7	-0.234125	-0.639494	-0.0970906	0					0.570892	0.695682	0.529383	0.5	0.486731	0.736076	NaN	NaN	NaN	0.858484	NaN	NaN	1	1	1	1	0	0	0	0	0	1	1	1	0	0	0	0
PSPC1	Paraspeckle component 1	Q8WXF1-2;Q8WXF1;X6RDA4	Q8WXF1-2;Q8WXF1;X6RDA4	2.33396	1.02173	0.728945	1.22441	+				0.0374647	0.206661	0.28997	0.0940451	0.846876	0.828035	-0.151148	0.534382	0.899302	0.855129	-0.089797	0.367543	3	8	7	7	7	8	4	5	1	4	5	5	6	5	3	5
PTBP1	Polypyrimidine tract-binding protein 1	P26599;P26599-2;P26599-3;A6NLN1;A0A0D9SF20;K7EKJ7;K7EK45;K7ELW5;K7ES59;A0A087WUW5;A0A087WU68;X6R242;Q9UKA9-4;Q9UKA9-3	P26599;P26599-2;P26599-3;A6NLN1	0.195086	-0.168645	0.118256	0.16378					0.440833	0.553705	0.464227	0.430122	0.555583	0.583419	-0.0164717	0.364943	0.438503	0.616409	0.00906261	0.253018	18	17	19	17	14	12	11	11	17	19	17	16	12	13	10	11
PTGES3	Prostaglandin E synthase 3	Q15185-4;Q15185;A0A087WYT3;Q15185-3;B4DDC6;Q15185-2	Q15185-4;Q15185;A0A087WYT3;Q15185-3;B4DDC6	-0.355812	0.366231	-0.118256	-0.015234					0.606996	0.384674	0.535773	0.506533	1.04228	0.66342	0.077374	0.639937	1.1057	0.826241	0.0384169	0.594318	3	4	5	5	4	6	3	3	3	4	3	5	6	6	3	6
PTGR1	Prostaglandin reductase 1	Q14914-2;Q14914;F2Z3J9;Q5JVP2;F6XGT7	Q14914-2;Q14914;F2Z3J9	0.00771797	-0.381375	-0.860016	-0.166105					0.497651	0.619952	0.743119	0.57086	NaN	-0.0275484	NaN	-0.100661	0.0129942	-0.0649819	0.106573	-0.0177395	1	2	4	5	2	0	2	1	0	2	7	3	0	2	2	4
PTPLAD1	Very-long-chain (3R)-3-hydroxyacyl-[acyl-carrier protein] dehydratase 3	Q9P035;H3BPZ1;H3BS72;Q9P035-2;H3BRL8;H3BMZ1	Q9P035;H3BPZ1;H3BS72	0.702481	-1.53824	-1.12514	-0.631955					0.295973	0.890954	0.803529	0.751544	-0.17316	-0.250773	-0.0564868	-0.358796	NaN	-0.738804	0.138895	-0.309634	1	1	2	2	2	1	1	0	0	0	3	4	2	2	2	0
PTPN1	Tyrosine-protein phosphatase non-receptor type 1;Tyrosine-protein phosphatase non-receptor type	P18031;B4DSN5	P18031;B4DSN5	1.29458	0.520961	-0.0970906	0					0.161623	0.338297	0.529383	0.5	-0.222469	-0.306504	0.202631	-0.533375	-0.0194525	-0.42114	NaN	NaN	1	2	3	2	1	0	0	0	0	1	2	1	0	0	0	0
PTRF	Polymerase I and transcript release factor	Q6NZI2;Q6NZI2-2;Q6NZI2-3	Q6NZI2;Q6NZI2-2	-0.855028	-0.785076	-1.40447	-0.930169					0.742934	0.735189	0.856874	0.841329	-1.16069	-1.69708	-1.11067	-0.902665	-1.34518	-2.12062	-1.12868	-1.16557	14	10	14	10	8	7	11	10	17	16	14	15	11	11	13	12
PUF60	Poly(U)-binding-splicing factor PUF60	Q9UHX1-6;Q9UHX1-5;Q9UHX1-4;Q9UHX1-3;Q9UHX1-2;Q9UHX1;E9PQ56;H0YEM1;E9PN18;E9PMU7;H0YCP8;E9PL19	Q9UHX1-6;Q9UHX1-5;Q9UHX1-4;Q9UHX1-3;Q9UHX1-2;Q9UHX1;E9PQ56;H0YEM1	1.19612	-0.574001	1.90291	0.36487					0.180705	0.677092	0.0742517	0.347442	0.471017	0.415784	0.155285	0.326644	0.551083	0.284682	-0.193431	0.519064	4	4	5	4	3	5	1	1	2	3	8	4	2	3	0	4
PURA	Transcriptional activator protein Pur-alpha	Q00577	Q00577	-1.82622	-1.71684	-4.00416	-2.86017					0.918261	0.915374	0.998818	0.998946	-0.263009	0.00948082	-0.0352291	0.057312	NaN	-0.492876	NaN	NaN	1	1	1	1	0	0	0	0	1	1	3	3	3	2	2	4
PXDN	Peroxidasin homolog	Q92626;H7C1W1;Q92626-2;H7C300;C9J4I9	Q92626	0.702481	1.39456	-0.0970906	0.602993					0.295973	0.132088	0.529383	0.258421	-1.08687	-1.55112	NaN	NaN	NaN	-2.56862	NaN	NaN	1	1	2	0	0	0	1	0	0	0	0	0	0	0	0	0
PYCR1	Pyrroline-5-carboxylate reductase 1, mitochondrial;Pyrroline-5-carboxylate reductase	P32322-2;P32322;P32322-3;J3QL24;J3QKT4;J3KQ22;E2QRB3;J3QR88;J3QLK9;J3QL23;J3QL32;J3KTA8;J3QKT3;J3QRZ0;A0A087WZR9	P32322-2;P32322;P32322-3;J3QL24;J3QKT4;J3KQ22;E2QRB3;J3QR88;J3QLK9;J3QL23;J3QL32	0.173778	0.208536	-0.0970906	-1					0.447256	0.433698	0.529383	0.858814	-0.546995	-0.60787	NaN	-0.16291	NaN	-0.736473	NaN	NaN	1	1	2	1	0	0	0	0	0	1	2	0	0	0	1	1
PYGB	Glycogen phosphorylase, brain form	P11216;H0Y4Z6	P11216	-0.113465	-0.842946	-0.661244	-0.537079					0.534496	0.750136	0.69219	0.718153	-0.321688	-0.265304	0.134212	-0.292027	-0.525843	-0.483566	0.273873	-0.598175	9	10	13	8	4	3	6	8	7	11	10	12	3	5	6	9
PYGL	Glycogen phosphorylase, liver form;Phosphorylase	P06737-2;E9PK47;P06737	P06737-2;E9PK47;P06737	-1.34909	-0.573744	-1.41738	0.795628					0.848354	0.677018	0.859079	0.196191	0.869893	0.938995	-0.0978715	0.863828	0.829798	1.21959	NaN	-1.10512	2	3	2	4	0	0	0	2	2	3	5	3	0	2	1	2
QARS	Glutamine--tRNA ligase	P47897;P47897-2;H7C0R3;C9J165;F2Z2V6	P47897;P47897-2	-0.095709	-0.417101	-0.0985793	-0.355249					0.529109	0.630795	0.529833	0.64873	-0.248576	-0.0449772	-0.0224975	0.0347565	-0.169091	-0.0240273	0.0202495	0.0535043	8	9	12	8	5	9	6	10	5	9	14	10	7	10	7	14
QKI	Protein quaking	Q96PU8-5;Q96PU8-9;Q96PU8-8;Q96PU8-6;Q96PU8-3;Q96PU8;H0YG47;F5GXS8;F5GYM3;H0YGD6;F5H5U6;F5H8C8;F5GYT7	Q96PU8-5;Q96PU8-9;Q96PU8-8;Q96PU8-6;Q96PU8-3;Q96PU8;H0YG47;F5GXS8;F5GYM3;H0YGD6	1.75885	-0.241125	1.31704	1.28889					0.0897875	0.576544	0.158655	0.0829392	0.341822	0.469654	-0.226608	0.526865	0.3647	0.53331	-0.109227	0.0529497	2	5	4	3	3	3	0	2	1	3	4	2	2	1	0	0
RAB10	Ras-related protein Rab-10	P61026	P61026	0.319504	-0.00951848	0.294957	-0.294568					0.403696	0.50304	0.411396	0.62425	-0.340224	-0.366558	-0.0843274	-0.075819	-0.0272693	-0.449396	-0.154091	-0.0204082	2	3	3	3	2	2	2	2	3	2	2	2	3	2	2	2
RAB11B;RAB11A	Ras-related protein Rab-11B;Ras-related protein Rab-11A	Q15907;P62491-2;H3BMH2;Q15907-2;H3BSC1;P62491;B4DQU5;M0R377;M0R2D0;H3BN38;P57735;A0A0C4DGX5	Q15907;P62491-2;H3BMH2;Q15907-2;H3BSC1;P62491	0.281583	0.109816	2.17478	-2.94613			+		0.414939	0.464968	0.0493423	0.99923	-0.485365	-0.453157	-0.159976	-0.173698	-0.639113	-0.560881	0.197669	NaN	2	4	3	4	2	1	1	1	3	4	7	4	0	0	2	5
RAB14	Ras-related protein Rab-14	P61106;X6RFL8	P61106;X6RFL8	-1.17464	-0.333744	0.902909	-0.841433					0.81495	0.605349	0.246495	0.817147	-0.46023	-0.358272	-0.0644126	-0.319695	-0.256264	-0.422697	NaN	-0.502132	2	5	6	5	1	1	3	3	3	8	7	5	0	0	2	4
RAB1A	Ras-related protein Rab-1A	P62820;E7END7;P62820-2;P62820-3;Q92928;H0YLJ8;H0YL94;P59190-2;P59190	P62820;E7END7;P62820-2	-0.105141	-0.313632	0.317644	-0.519552					0.531971	0.599137	0.404708	0.711756	-0.425113	-0.310943	-0.0675084	-0.230069	-0.334843	-0.363262	0.0153785	-0.172652	8	8	5	6	5	4	4	4	7	8	10	5	4	3	4	4
RAB1B	Ras-related protein Rab-1B	Q9H0U4;E9PLD0;A0A087WTI1	Q9H0U4;E9PLD0;A0A087WTI1	-0.297519	-0.359996	-0.14878	-1.0002					0.589795	0.613417	0.544971	0.858861	NaN	-0.327972	-0.0917417	-0.0590436	NaN	NaN	0.267414	-0.037556	0	0	0	0	2	1	2	0	0	0	0	0	1	1	1	1
RAB21	Ras-related protein Rab-21	Q9UL25	Q9UL25	-0.403721	-1.48985	1.06642	-0.493266					0.620979	0.883539	0.209054	0.702036	-0.0294866	-0.206119	-0.0803748	1.38349	NaN	0.44502	-0.239981	NaN	1	1	0	2	1	0	0	0	0	2	2	0	0	1	0	1
RAB2A;DKFZp313C1541;RAB2B	Ras-related protein Rab-2A;Ras-related protein Rab-2B	P61019;E9PKL7;P61019-2;Q5HYI5;Q8WUD1;E9PE37;H7C125;H0YD31;H0YDL5;Q8WUD1-2;Q6PIK3	P61019;E9PKL7;P61019-2;Q5HYI5;Q8WUD1	-0.707855	-0.226198	0.354587	-0.0176552					0.705442	0.571859	0.393876	0.507571	-0.938076	-0.687075	-0.0165488	-0.169992	-0.664824	-0.576296	-0.0495574	-0.349734	6	8	7	9	5	7	8	6	5	6	10	10	6	4	5	9
RAB32	Ras-related protein Rab-32	Q13637;O14966;P57729	Q13637	-0.297519	-1.064	1.65709	-0.267613					0.589795	0.802868	0.104161	0.613206	-0.593834	-0.336956	-0.449782	-0.179439	NaN	NaN	0.00627177	0.151413	0	0	1	0	1	2	1	1	0	0	2	0	0	1	1	1
RAB34	Ras-related protein Rab-34	Q9BZG1;A8MYQ9;C9JBG0;Q9BZG1-4;Q9BZG1-2;Q96PJ7;C9JY26;E7ES60;K7EIF2;H7C0Y7;V9GY61;K7EJW7;J3QLC6	Q9BZG1;A8MYQ9;C9JBG0;Q9BZG1-4;Q9BZG1-2;Q96PJ7;C9JY26;E7ES60;K7EIF2;H7C0Y7	0.173778	-0.390904	-0.0970906	-0.493266					0.447256	0.622853	0.529383	0.702036	-0.666324	-0.603114	NaN	NaN	-0.73953	-0.911822	NaN	NaN	3	2	3	3	0	0	0	0	2	2	3	4	0	0	0	1
RAB3GAP1	Rab3 GTPase-activating protein catalytic subunit	Q15042-4;Q15042;Q15042-3	Q15042-4;Q15042;Q15042-3	0.280273	1.66181	-0.0970906	0					0.415329	0.091668	0.529383	0.5	0.150915	-0.480673	-1.12953	NaN	NaN	-0.303536	NaN	NaN	1	1	4	1	0	0	0	0	0	0	0	1	0	0	0	0
RAB5C	Ras-related protein Rab-5C	P51148;P51148-2;K7ERI8;K7ERQ8;F8VVK3;K7ENY4;F8VWU4;F8VVZ0;F8VUA5;K7EIP6;F8WCY6;F8WD79;F8VPW9;F8VSF8;F8VWZ7	P51148;P51148-2;K7ERI8;K7ERQ8;F8VVK3;K7ENY4	-0.118724	0.567428	-0.06733	-0.468478					0.536091	0.324799	0.520386	0.692735	-0.542993	-0.383733	0.0608389	-0.363104	-0.766359	-0.406677	-0.0417291	-0.352876	3	4	4	5	4	5	4	5	4	4	5	5	5	5	4	6
RAB6A	Ras-related protein Rab-6A	P20340-2;P20340;P20340-4;Q9NRW1;F5H3K7;C9JU14;P20340-3;J3KR73;Q9NRW1-2;F5GX61;Q9H0N0;C9JB90;C9J0I2;Q14964	P20340-2;P20340;P20340-4	0.223209	-0.143783	0.0134487	-0.332968					0.432381	0.545826	0.495926	0.639807	-0.357694	-0.498112	-0.19098	-0.193706	-0.616148	-0.752358	-0.0143024	-0.377768	8	8	7	8	7	5	5	8	4	5	8	7	5	4	6	8
RAB7A	Ras-related protein Rab-7a	P51149;C9J592;C9J8S3;C9J4V0;C9J4S4;C9IZZ0;C9J7D1	P51149;C9J592;C9J8S3;C9J4V0	-0.0207873	0.157689	0.0540052	0.0957177					0.506328	0.449765	0.483646	0.459022	-0.403909	-0.440182	0.0859021	-0.313547	-0.407174	-0.452365	0.126131	-0.251483	6	10	9	8	3	4	7	5	7	9	10	6	3	3	5	4
RAB8B	Ras-related protein Rab-8B	H0YNE9;Q92930	H0YNE9;Q92930	-0.297519	-0.359996	1.18362	1.17454					0.589795	0.613417	0.184407	0.103359	-0.528215	NaN	NaN	-0.0809248	NaN	NaN	-0.0708602	0.209339	0	0	0	0	0	1	1	0	0	0	0	0	0	1	1	0
RAC1;RAC3	Ras-related C3 botulinum toxin substrate 1;Ras-related C3 botulinum toxin substrate 3	P63000;P63000-2;P60763;J3KSC4;J3QLK0;F8WET9;B1AH79;G3V4H1;G3V476;Q9H4E5-2;Q9H4E5	P63000;P63000-2;P60763	0.0350366	0.0416433	0.590668	0.162887					0.489336	0.486701	0.326903	0.430499	-0.238641	-0.310705	-0.310283	-0.258945	-0.14087	-0.151728	-0.24681	-0.162527	4	5	7	6	4	3	2	5	5	6	6	6	3	4	4	5
RAD21;RAD21L1	Double-strand-break repair protein rad21 homolog;Double-strand-break repair protein rad21-like protein 1	O60216;Q9H4I0;E5RG18;E5RI01;E5RFZ5	O60216;Q9H4I0	-0.297519	-0.799434	0.0520189	0					0.589795	0.738939	0.484247	0.5	0.93091	0.699766	-0.126452	0.461625	NaN	NaN	-0.17237	NaN	0	0	1	0	1	1	1	0	0	0	1	1	1	1	1	1
RAD50	DNA repair protein RAD50	Q92878;Q92878-2;Q92878-3;E7EN38;E7ESD9;H7C0V2;H7C0P8;C9JNH8;E9PM98	Q92878;Q92878-2;Q92878-3	2.27307	2.16122	0.876223	0.109726	+	+			0.041421	0.0417779	0.25293	0.453051	0.748849	0.604287	0.0893345	0.563234	0.642904	0.683029	-0.0282182	NaN	2	4	8	8	3	2	1	0	0	0	4	2	1	1	0	1
RAI14	Ankycorbin	Q9P0K7-3;Q9P0K7;Q9P0K7-2;Q9P0K7-4;D6RE17;D6REL2;D6R9G6;D6RF74;D6RB27;D6R9G4;D6RBY4;D6RB25;D6RBW6;Q9C0D0-2;H0Y518;Q9C0D0	Q9P0K7-3;Q9P0K7;Q9P0K7-2;Q9P0K7-4	7.47098	6.74166	6.57742	6.36418	+	+	+	+	5.97e-09	3.37e-08	2.96e-07	3.92e-12	-0.643327	-0.637928	-0.417451	-0.099827	0.456406	0.0722489	-1.08832	0.981137	35	32	54	48	15	16	22	17	1	3	7	6	0	0	0	1
RALY	RNA-binding protein Raly	Q9UKM9;Q5QPL9;Q9UKM9-2;Q5QPM1;Q5QPM0;Q5QPM2	Q9UKM9;Q5QPL9;Q9UKM9-2;Q5QPM1;Q5QPM0	0.407853	0.126802	0.0319168	-0.216403					0.377822	0.459566	0.490333	0.591977	0.73671	0.591039	-0.123445	0.0419493	0.599005	0.543856	-0.0771438	-0.0836892	9	10	7	9	9	9	6	5	9	10	10	8	8	9	6	6
RAN	GTP-binding nuclear protein Ran	P62826;B5MDF5;J3KQE5;F5H018;H0YFC6;B4DV51;A0A087X0W0	P62826;B5MDF5;J3KQE5;F5H018;H0YFC6	0.19457	-0.0972324	0.0880596	0.179555					0.440988	0.531027	0.473346	0.423471	0.484849	0.533645	0.0702132	0.40005	0.550037	0.571055	0.00717764	0.450809	12	12	13	13	14	12	13	13	11	13	14	13	14	12	12	13
RANBP1	Ran-specific GTPase-activating protein	F6WQW2;P43487-2;P43487;C9JXG8;C9JJ34;C9JDM3;C9JGV6;C9JIC6;F8WCY3	F6WQW2;P43487-2;P43487;C9JXG8;C9JJ34;C9JDM3;C9JGV6	1.48277	0.37697	1.33921	1.76794				+	0.128942	0.381392	0.154616	0.0286806	0.715215	0.701606	-0.00435853	0.871502	0.752473	0.469449	0.136556	0.492311	2	3	4	2	2	3	0	2	1	2	3	2	3	3	0	0
RANBP2	E3 SUMO-protein ligase RanBP2;Putative peptidyl-prolyl cis-trans isomerase	P49792;Q99666;O14715;J3KQ37;Q99666-2;F8W705;P0DJD0;P0DJD1;F8VYC4;H0YBN8;C9J1W9;C9JF75;C9J6W1;Q7Z3J3-2;F8WBP7	P49792	-0.248431	-2.93777	-1.85028	-3.24958					0.575174	0.990668	0.919971	0.999761	0.477984	0.421282	0.0275792	0.346654	NaN	0.0110206	-0.130862	NaN	1	1	4	0	11	9	1	1	1	1	6	3	11	14	7	10
RANGAP1	Ran GTPase-activating protein 1	P46060;B0QYT5;B0QYT4;H0Y4Q3;B0QYT6	P46060	-0.297519	0.44928	-0.0970906	0					0.589795	0.359527	0.529383	0.5	0.0897897	0.307834	0.0666247	-0.284161	NaN	0.266859	NaN	NaN	0	0	5	4	0	0	0	0	0	1	3	3	1	1	1	0
RAP1B;RAP1A	Ras-related protein Rap-1b;Ras-related protein Rap-1b-like protein;Ras-related protein Rap-1A	P61224-2;P61224-3;P61224;A6NIZ1;P61224-4;E7ESV4;F5H7Y6;P62834;B7ZB78;F5GX62;F5H823;F5GZG1;F5H004;A0A075B6Q0;F5GYB5;F5H4H0;F5GYH7;F5H077;F5GWU8;F5H491;F5H0B7;F5H500;F5H6R7;F8WBC0	P61224-2;P61224-3;P61224;A6NIZ1;P61224-4;E7ESV4;F5H7Y6;P62834;B7ZB78;F5GX62;F5H823;F5GZG1;F5H004;A0A075B6Q0;F5GYB5	0.0500418	0.0108827	-2.07001	0.321843					0.484771	0.496524	0.941992	0.364678	-0.43613	-0.283982	-0.455144	-0.00156797	-0.594554	-0.228381	-0.716027	0.121856	4	5	4	2	1	1	2	2	4	3	5	2	3	1	1	2
RAP2B;RAP2A	Ras-related protein Rap-2b;Ras-related protein Rap-2a	P61225;F6U784;P10114	P61225;F6U784;P10114	3.39464	1.94734	0.460278	0.109726	+				0.00479556	0.0594782	0.363365	0.453051	-0.398328	-0.565676	NaN	NaN	-0.223071	-0.113805	NaN	NaN	3	3	2	1	1	0	1	1	0	2	0	0	0	0	0	1
RARS	Arginine--tRNA ligase, cytoplasmic	P54136;P54136-2;E5RJM9;E5RH09	P54136;P54136-2	-0.974723	-0.28807	-0.315279	-2.06017					0.771485	0.591206	0.594596	0.986609	-0.333717	-0.223977	0.11793	-0.13567	-0.567666	-0.206075	-0.0359506	-0.0434988	6	10	16	12	3	6	2	4	3	11	14	12	4	5	3	8
RBBP4	Histone-binding protein RBBP4	Q09028-3;Q09028;Q09028-2;Q09028-4;H0YF10;H0YCT5;H0YDK2;H0YEU5;E9PNS2;E9PIC4;E9PNS6;C9JAJ9;C9JPP3	Q09028-3;Q09028;Q09028-2;Q09028-4;H0YF10	-0.0484189	-0.714315	-0.4695	0.340412					0.514736	0.716314	0.63926	0.357203	1.03159	0.869321	-0.098167	0.577791	0.892329	0.952167	-0.112181	0.603882	5	6	9	6	11	6	4	5	4	4	7	9	10	10	4	7
RBBP6	E3 ubiquitin-protein ligase RBBP6	Q7Z6E9-2;Q7Z6E9;Q7Z6E9-4;H3BSK8	Q7Z6E9-2;Q7Z6E9	-0.248431	0.200566	-0.419563	-1.47359					0.575174	0.43621	0.624972	0.943416	NaN	NaN	-0.198068	NaN	NaN	NaN	NaN	NaN	0	1	1	0	1	1	0	0	0	1	0	0	1	1	1	0
RBBP7	Histone-binding protein RBBP7	E9PC52;Q16576;Q16576-2;Q5JP02;Q5JP01;Q5JNZ6	E9PC52;Q16576;Q16576-2	-0.297519	-0.359996	1.06301	1.60299				+	0.589795	0.613417	0.209798	0.0424238	NaN	NaN	-0.183262	0.619553	NaN	NaN	-0.0702345	NaN	0	0	0	0	3	3	2	1	0	0	0	0	3	3	0	0
RBM12	RNA-binding protein 12	Q9NTZ6;A6PVI1;A6PVI0;Q5JX62	Q9NTZ6	-0.297519	-0.975867	2.88226	0			+		0.589795	0.7827	0.0143188	0.5	NaN	0.654277	-0.199346	0.237975	NaN	NaN	0.0163589	NaN	0	0	1	0	4	2	0	1	0	0	0	1	0	0	0	1
RBM14	RNA-binding protein 14	Q96PK6;Q96PK6-2;Q96PK6-3;A0A0A6YYI9;Q96PK6-4;F8WDX3;A0A0A0MSL8;B8ZZ74	Q96PK6	2.23954	0.358042	1.0422	1.82512	+			+	0.0437394	0.387182	0.214378	0.0248803	0.607339	0.591862	0.104839	0.382948	0.576128	0.92271	0.186053	0.248242	4	7	3	3	17	15	7	6	0	4	4	3	9	7	4	4
RBM25	RNA-binding protein 25	P49756;P49756-2;P49756-3;E9PQU5;H0YE46;E9PSE8	P49756;P49756-2;P49756-3	2.50061	1.5323	3.78221	2.5667	+		+	+	0.0281922	0.109937	0.00204105	0.00289696	0.705571	0.542815	0.0466486	0.497862	0.211676	0.55453	0.115384	0.477549	2	3	6	3	5	2	2	3	1	1	2	2	0	0	0	1
RBM3	Putative RNA-binding protein 3	P98179	P98179	1.06337	0.316731	1.20698	0.602993					0.208571	0.399904	0.179719	0.258421	-0.25961	0.0610835	-0.6995	-0.93566	-0.506724	0.324825	-0.609958	NaN	2	1	3	3	2	2	1	0	1	0	3	2	2	1	0	0
RBM39	RNA-binding protein 39	Q14498-2;Q14498;Q14498-3;G3XAC6;H0Y4X3;Q5QP23;Q5QP22;Q86U06-4;Q86U06-5;Q86U06-2;Q86U06;G3V5Z6;H0YJJ3;G3XAP0;Q86U06-3;A0A087X122;G3V546	Q14498-2;Q14498;Q14498-3;G3XAC6;H0Y4X3	0.392566	0.213032	0.862328	0.616719					0.382264	0.432282	0.256315	0.253673	0.651239	0.569085	0.0171003	0.47591	0.65422	0.56152	-0.0055261	0.260147	4	6	6	6	6	6	5	4	3	4	6	6	5	6	2	3
RBM4;RBM4B	RNA-binding protein 4;RNA-binding protein 4B	Q9BWF3;E9PB51;Q9BWF3-4;Q9BWF3-3;D6R9K7;J3QRR5;Q9BWF3-2;Q9BQ04;E9PLB0;E9PM61;U3KQD5	Q9BWF3;E9PB51;Q9BWF3-4;Q9BWF3-3;D6R9K7;J3QRR5;Q9BWF3-2;Q9BQ04;E9PLB0;E9PM61;U3KQD5	1.28027	2.37922	1.85514	1.35422		+			0.164311	0.0283925	0.0794816	0.0727244	0.143881	-0.250813	-0.0923218	-0.105778	0.894631	0.157697	-0.183185	NaN	1	2	4	2	6	6	1	0	0	0	1	1	2	3	0	0
RBM8A	RNA-binding protein 8A	Q9Y5S9;Q9Y5S9-2	Q9Y5S9;Q9Y5S9-2	2.49141	-0.844765	-0.0839425	0.31735	+				0.028649	0.750599	0.52541	0.366494	0.747909	0.595052	0.0113648	0.501061	0.569687	0.575737	-0.00401698	0.24638	2	3	4	3	4	3	1	2	1	2	3	4	3	4	1	1
RBM9;RBFOX2;RBFOX1;RBFOX3	RNA binding protein fox-1 homolog;RNA binding protein fox-1 homolog 2;RNA binding protein fox-1 homolog 1;RNA binding protein fox-1 homolog 3	B0QYV1;O43251-5;O43251-10;O43251-2;O43251;O43251-6;O43251-8;S4R469;F8VR27;F8VZY7;O43251-3;O43251-9;Q9NWB1-3;O43251-4;B0QYY4;A0A087X2B1;Q9NWB1-4;Q9NWB1-5;Q9NWB1;O43251-7;J3KNW3;Q9NWB1-2;B7Z1U7;F8VZG9;I3L1D4;S4R3K7;F8VRS4;B0QYY7;A6NFN3;A6NFN3-2;J3QRF4;B0QYY6;J3QQZ2	B0QYV1;O43251-5;O43251-10;O43251-2;O43251;O43251-6;O43251-8;S4R469;F8VR27;F8VZY7;O43251-3;O43251-9;Q9NWB1-3;O43251-4;B0QYY4;A0A087X2B1;Q9NWB1-4;Q9NWB1-5;Q9NWB1;O43251-7;J3KNW3;Q9NWB1-2;B7Z1U7;F8VZG9;I3L1D4;S4R3K7;F8VRS4;B0QYY7;A6NFN3;A6NFN3-2;J3QRF4	-0.297519	-0.359996	0.460278	1.81773				+	0.589795	0.613417	0.363365	0.0253462	NaN	NaN	NaN	NaN	NaN	NaN	NaN	0.886586	0	0	0	0	1	0	4	3	0	0	0	0	0	0	1	1
RBMX	RNA-binding motif protein, X chromosome;RNA-binding motif protein, X chromosome, N-terminally processed	P38159;P38159-2;H3BT71;H0Y6E7;H3BUY5;H3BR27;P38159-3;H3BNC1;O75526	P38159;P38159-2;H3BT71;H0Y6E7;H3BUY5	-0.0967365	-0.069653	0.0996128	0.655137					0.529421	0.522237	0.469855	0.24063	0.641135	0.468356	-0.020675	0.111851	0.624254	0.390462	-0.00489799	0.00724076	11	11	10	8	11	13	7	8	10	11	13	10	13	10	7	10
RBPJ	Recombining binding protein suppressor of hairless	Q06330-3;Q06330-2;Q06330-5;Q06330-4;Q06330-6;Q06330-7;Q06330;D6R927;H0Y8R3;D6RB37;D6RBQ8;D6R946;D6RA45;D6RCM1	Q06330-3;Q06330-2;Q06330-5;Q06330-4;Q06330-6;Q06330-7;Q06330;D6R927	-0.517228	-0.703399	-0.420651	0.109726					0.653454	0.713346	0.625285	0.453051	NaN	0.123804	NaN	NaN	NaN	NaN	NaN	NaN	1	1	2	2	3	2	1	0	1	1	1	2	3	2	0	1
RBPMS	RNA-binding protein with multiple splicing	Q93062-4;Q93062-5;Q93062;Q93062-2;Q93062-3;B4E3T4;H0YBU9;H0YC46;E5RJD7;E5RFP4;E5RJ31;Q6ZRY4	Q93062-4;Q93062-5;Q93062;Q93062-2;Q93062-3;B4E3T4;H0YBU9	-1.35884	-0.377631	-0.14878	-0.338404					0.850095	0.61881	0.544971	0.641991	-0.779099	-0.748514	-0.505532	-0.832002	-0.62937	-1.04333	-0.270064	-1.11054	1	1	2	1	1	0	2	2	2	1	1	1	2	1	3	1
RBX1	E3 ubiquitin-protein ligase RBX1;E3 ubiquitin-protein ligase RBX1, N-terminally processed	P62877	P62877	-0.234125	1.82108	-0.0697115	-0.81702					0.570892	0.0724097	0.521106	0.81011	NaN	NaN	-0.153367	0.0795993	NaN	NaN	0.00443522	NaN	1	1	1	1	2	2	1	2	0	1	1	1	1	2	2	1
RCC1	Regulator of chromosome condensation	P18754;P18754-2;C9JW69;C9JRH2;C9JMJ4;C9J3R0;C9JQZ4	P18754;P18754-2;C9JW69;C9JRH2;C9JMJ4;C9J3R0;C9JQZ4	0.336118	0.0866263	1.25008	1.07344					0.398794	0.472352	0.17127	0.12426	1.21388	1.11505	0.0967006	0.649229	1.43237	1.42345	0.183307	0.781067	1	2	1	1	5	5	1	2	0	2	1	0	3	3	0	1
RCC2	Protein RCC2	Q9P258	Q9P258	0.691711	1.02053	0.199426	0.794172					0.298819	0.206934	0.439822	0.196625	1.06902	0.96213	-0.579234	1.32618	1.22987	1.09797	-0.547037	1.25018	4	3	4	3	10	8	3	4	2	1	1	1	6	6	2	5
RDX	Radixin	P35241;P35241-5;P35241-4;P35241-3;E9PNV3;E9PQ82;P35241-2;E9PNP4	P35241;P35241-5;P35241-4	-0.826222	-0.210238	-1.68296	-0.493266					0.735795	0.566838	0.899346	0.702036	-0.171463	0.0573763	-0.266644	0.326823	NaN	-0.0932939	-0.411034	NaN	0	0	4	4	0	1	0	1	0	1	3	2	1	1	1	1
RECQL	ATP-dependent DNA helicase Q1	P46063;F8WA66;F8WD97;F5H2L2;F5H4P4;F5H3W0;F5GYB7	P46063	1.07385	0.788871	0.549931	0.487281					0.206284	0.263817	0.338138	0.300198	0.95836	0.662026	0.211248	0.386195	0.904621	0.77301	0.345414	0.375332	6	6	7	7	14	11	8	3	5	5	3	1	6	8	6	4
RELA	Transcription factor p65	Q2TAM5;E9PKH5;A0A087X0W8;Q04206-2;Q04206-3;Q04206;Q04206-4;E9PI38;E9PQS6;E9PKV4;A0A087WVP0;E9PMD5;E9PJR1;E9PRX2;E9PNV4;E9PJZ9;E9PM47;E9PNK5;E9PN69	Q2TAM5;E9PKH5;A0A087X0W8;Q04206-2;Q04206-3;Q04206;Q04206-4;E9PI38;E9PQS6;E9PKV4;A0A087WVP0	2.89693	2.74417	0.255696	2.56051	+	+		+	0.0135368	0.0140045	0.423031	0.00295651	-0.116696	-0.210629	-0.0280561	-0.586802	-0.775861	-0.401194	-0.210449	-0.498688	6	7	6	7	4	2	3	2	1	1	1	1	1	2	0	1
RERE	Arginine-glutamic acid dipeptide repeats protein	Q9P2R6;H7BYW9;H0Y975;A0A075B770;B1AKN3	Q9P2R6;H7BYW9	0.294579	2.20057	-0.0970906	0		+			0.411077	0.0390416	0.529383	0.5	NaN	NaN	NaN	NaN	-0.104932	-0.0804758	NaN	NaN	1	1	4	2	0	0	0	0	0	0	0	0	0	0	0	0
REXO2	Oligoribonuclease, mitochondrial	H0YG54;H0YGR4;Q9Y3B8-2;Q9Y3B8-3;Q9Y3B8;F5GYG5	H0YG54;H0YGR4;Q9Y3B8-2;Q9Y3B8-3;Q9Y3B8;F5GYG5	-0.248431	1.04987	-0.0970906	0					0.575174	0.200288	0.529383	0.5	NaN	-0.391621	NaN	0.0522797	NaN	-0.695707	NaN	NaN	1	1	2	2	0	0	0	0	0	1	2	0	0	0	0	0
RFC4	Replication factor C subunit 4	P35249;P35249-2;C9JZI1;C9J8M3;C9JTT7;C9JXZ7;C9JGY5;F8WE44;C9JW34;H7C1P0	P35249;P35249-2;C9JZI1;C9J8M3;C9JTT7	1.01148	0.647189	2.20834	0			+		0.220119	0.302166	0.0467959	0.5	1.74668	1.62317	0.00221948	2.25919	NaN	1.70529	-0.331706	NaN	0	2	2	1	2	2	0	0	0	0	1	0	0	0	0	0
RFC5	Replication factor C subunit 5	P40937;P40937-2;C9JH72;F5H304;F5H0U6	P40937;P40937-2	-0.297519	0.200566	2.98559	0.566704			+		0.589795	0.43621	0.0116983	0.271193	NaN	NaN	NaN	NaN	NaN	NaN	-0.289471	NaN	0	0	1	0	6	2	0	1	0	0	0	0	1	0	0	0
RHOA	Transforming protein RhoA	P61586;C9JNR4;C9JX21;C9JRM1	P61586;C9JNR4;C9JX21	1.31056	0.231205	1.47192	0.175779					0.158655	0.426568	0.131869	0.425061	-0.375827	-0.314104	-0.0633193	-0.178732	-0.390188	-0.302103	-0.0599851	-0.18091	7	8	8	9	4	3	4	5	4	4	6	7	2	2	5	6
RHOC	Rho-related GTP-binding protein RhoC	Q5JR08;P08134;E9PQH6;Q5JR07;Q5JR05;Q5JR06;E9PN11;E9PLA2;P62745	Q5JR08;P08134;E9PQH6;Q5JR07;Q5JR05	2.75553	0.33868	0.876223	-0.295088	+				0.0177517	0.39313	0.25293	0.624462	-0.71544	-0.432061	0.251995	-0.411662	-0.827597	0.254544	NaN	-0.434048	2	3	2	2	1	1	1	1	1	2	2	1	0	1	1	1
RIC8A	Synembryn-A	Q9NPQ8-2;Q9NPQ8-4;Q9NPQ8;Q9NPQ8-3;H0YEN0;E9PSI0;REV__E9PNP5;H0YE35;Q9NVN3-4;Q9NVN3-3;Q9NVN3;Q9NVN3-1;B7WPL0	Q9NPQ8-2;Q9NPQ8-4;Q9NPQ8;Q9NPQ8-3;H0YEN0	1.49999	0.553404	-0.0970906	0					0.126199	0.32885	0.529383	0.5	-0.169593	-0.110018	-0.155345	NaN	-0.209434	0.0831721	NaN	NaN	1	1	4	4	0	0	0	0	0	1	4	2	0	0	0	0
RNF213	E3 ubiquitin-protein ligase RNF213	Q63HN8;A0A0A0MTR7;Q63HN8-4;A0A0A0MTC1;Q63HN8-6;Q63HN8-5	Q63HN8;A0A0A0MTR7;Q63HN8-4;A0A0A0MTC1	1.71051	1.48122	2.769	1.86096			+	+	0.0959165	0.117819	0.0177574	0.0227211	0.0617149	0.147265	0.0932258	0.364418	0.732385	0.570277	0.293774	-0.0879128	3	4	7	8	5	4	3	2	1	1	2	2	2	1	0	1
RNH1	Ribonuclease inhibitor	P13489;H0YCR7;E9PIM9;E9PMJ3;E9PLZ3;E9PIK5;E9PMN0;E9PMA9;E9PR82;E9PMI1	P13489;H0YCR7	0.456284	0.227065	0.364199	0.810308					0.36386	0.427869	0.391071	0.191854	-0.140552	-0.140228	-0.153312	-0.197528	-0.209339	-0.0882311	-0.0928737	-0.217944	18	19	16	17	9	8	9	11	11	12	17	12	6	7	7	8
RNMTL1	RNA methyltransferase-like protein 1	Q9HC36;I3L0T6;I3L443	Q9HC36;I3L0T6;I3L443	3.60794	4.13488	0.460278	0	+	+			0.00295274	0.000465388	0.363365	0.5	NaN	NaN	NaN	NaN	0.27679	0.305042	0.723555	NaN	1	3	3	2	1	0	0	0	0	0	0	0	0	0	0	0
RNPEP	Aminopeptidase B	Q9H4A4;A6NKB8;A0A087WU27;A0A087WUS4;C9JMZ3;H7C2T3	Q9H4A4;A6NKB8	-0.297519	-0.0640014	1.55119	-1.04589					0.589795	0.520434	0.119442	0.869566	-0.538902	-0.374819	-0.451896	0.398033	NaN	-0.156952	NaN	0.38357	0	1	4	2	0	2	1	3	0	0	2	1	1	1	2	5
ROCK1	Rho-associated protein kinase 1	Q13464;J3KRH6	Q13464	-3.12502	-2.89757	-3.29279	-3.85423					0.991449	0.989829	0.993793	0.999983	-0.677127	-0.231385	-0.324333	0.122342	NaN	-0.50092	NaN	NaN	1	1	3	2	0	1	0	1	6	6	12	11	4	2	10	15
RPA1	Replication protein A 70 kDa DNA-binding subunit;Replication protein A 70 kDa DNA-binding subunit, N-terminally processed	P27694;I3L4R8;I3L2M5;I3L524	P27694;I3L4R8	0.787714	1.58335	0.202977	0.670811					0.273902	0.102447	0.438759	0.235416	1.09815	1.35838	-0.333255	1.63852	1.59855	1.20234	-0.317705	1.40614	5	6	9	12	16	15	11	9	2	3	4	6	15	14	7	11
RPA2	Replication protein A 32 kDa subunit	P15927;P15927-2;P15927-3;Q5TEJ7;Q5TEJ0	P15927;P15927-2;P15927-3;Q5TEJ7	0.702481	2.04987	-0.485052	-0.571279					0.295973	0.0503717	0.643671	0.730435	NaN	NaN	NaN	NaN	NaN	1.26723	NaN	1.52613	1	1	3	2	0	1	0	1	0	0	1	1	1	1	1	2
RPA3	Replication protein A 14 kDa subunit	B5MC59;P35244	B5MC59;P35244	1.70248	0.785529	1.51495	-0.493266					0.096963	0.264692	0.125017	0.702036	1.3358	1.40459	-0.250132	1.89857	NaN	1.25829	NaN	NaN	2	1	3	3	1	2	0	0	0	0	2	2	0	0	0	1
RPF2	Ribosome production factor 2 homolog	Q9H7B2;Q5VXN0	Q9H7B2;Q5VXN0	-1.98151	-0.359996	-0.0709213	0					0.934728	0.613417	0.521472	0.5	0.0973132	0.0129509	0.347355	-0.884568	NaN	NaN	NaN	NaN	1	1	0	0	0	1	0	0	0	1	1	0	1	0	0	0
RPL10	60S ribosomal protein L10	X1WI28;P27635;A0A087WV22;H7C123;H7C2C5;B8A6G2;A6QRI9;Q96L21;H7C2U2	X1WI28;P27635;A0A087WV22;H7C123;H7C2C5	0.0313689	-0.160618	0.239071	0.108522					0.490452	0.551163	0.427979	0.453564	-0.00255074	0.0223316	0.552099	-0.528455	-0.0618605	-0.000685583	0.129858	-0.12603	7	7	8	8	6	4	7	6	7	7	8	9	4	5	4	8
RPL10A	60S ribosomal protein L10a	P62906	P62906	-0.220913	-0.0588754	0.338507	-0.00715658					0.56693	0.518799	0.398581	0.503069	0.0297363	0.0816534	0.397718	-0.311797	-0.123329	0.0653232	0.396	-0.275596	7	9	9	10	7	7	6	10	7	8	10	10	9	8	7	10
RPL11	60S ribosomal protein L11	P62913;Q5VVC8;Q5VVC9	P62913;Q5VVC8;Q5VVC9	-0.213505	-0.0713002	-0.552517	-0.0527868					0.564706	0.522762	0.66258	0.522626	-0.0278085	0.0721266	0.507037	-0.507337	0.0630316	0.134518	0.220336	-0.22243	7	7	7	7	7	6	8	9	6	7	7	7	7	8	7	8
RPL12	60S ribosomal protein L12	P30050;P30050-2	P30050;P30050-2	-0.0142361	0.0720467	0.252484	-0.171575					0.504333	0.477	0.423986	0.573167	0.119346	0.0685862	0.245419	-0.202371	0.0825146	0.110777	0.16489	-0.0890117	11	10	9	10	7	8	8	10	9	8	9	10	7	8	9	10
RPL13	60S ribosomal protein L13	P26373;P26373-2;J3QSB4;H3BTH3;J3KS98;H3BUK8	P26373;P26373-2;J3QSB4	-0.138094	-0.162136	0.196833	-0.0776336					0.541959	0.551644	0.440599	0.533256	0.125154	0.10715	0.361379	-0.270591	-0.0427181	0.0603236	0.151307	-0.0238453	10	10	8	9	8	8	8	10	10	9	9	9	7	7	7	7
RPL13A;RPL13a	60S ribosomal protein L13a	P40429;M0QYS1;Q8J015;Q6NVV1;M0QZU1;A0A096LPE0	P40429;M0QYS1;Q8J015	-0.480907	-0.171606	0.173447	0.0481449					0.643171	0.554642	0.447613	0.479362	0.113151	0.0843812	0.247756	-0.231296	0.155319	0.123089	-0.114352	0.0851529	8	9	8	9	7	9	7	7	9	9	10	9	7	7	6	7
RPL14	60S ribosomal protein L14	P50914;E7EPB3	P50914;E7EPB3	0.240474	-0.0951857	0.545882	0.452028					0.427207	0.530375	0.339263	0.313508	0.123704	0.0650765	0.184293	-0.137722	-0.0695474	0.0798157	0.106057	-0.0040037	6	6	7	6	5	6	5	4	5	6	6	6	4	4	4	4
RPL15	60S ribosomal protein L15;Ribosomal protein L15	P61313;E7EQV9;E7ENU7;E7EX53;P61313-2;E7ERA2	P61313;E7EQV9;E7ENU7;E7EX53	-0.292842	0.120827	0.184537	0.0307534					0.588407	0.461466	0.444285	0.486813	0.0166726	0.093019	0.601559	-0.69561	-0.0201669	0.0862633	0.0799933	-0.0720127	12	11	13	12	11	12	11	13	13	14	13	12	11	12	10	12
RPL17	60S ribosomal protein L17	A0A087WXM6;J3QQT2;J3KRX5;P18621;P18621-3;A0A0A6YYL6;P18621-2;J3QLC8;A0A0A0MRF8;J3KRB3;A0A087WWH0;J3QS96;A0A087WY81;J3KSJ0	A0A087WXM6;J3QQT2;J3KRX5;P18621;P18621-3;A0A0A6YYL6;P18621-2;J3QLC8;A0A0A0MRF8;J3KRB3;A0A087WWH0;J3QS96	-0.2531	-0.062023	0.315901	-0.247886					0.576569	0.519803	0.405221	0.605065	0.181571	0.0531601	0.170967	-0.224724	-0.174716	0.0450755	0.0164186	0.0020976	7	7	7	8	4	5	5	5	6	7	7	7	6	5	4	7
RPL18	60S ribosomal protein L18	Q07020;J3QQ67;Q07020-2;G3V203;H0YHA7;F8VYV2;F8VUA6;A0A075B7A0;F8VXR6	Q07020;J3QQ67;Q07020-2;G3V203;H0YHA7;F8VYV2;F8VUA6;A0A075B7A0	-0.431332	-0.163217	0.253511	-0.274535					0.628968	0.551987	0.423681	0.616051	-0.015319	0.059904	0.678486	-0.629842	-0.0147954	0.085832	0.299171	-0.142856	7	7	7	7	7	7	6	6	7	8	8	7	7	6	7	7
RPL18A	60S ribosomal protein L18a	Q02543;M0R3D6;M0R1A7;M0R117;M0R0P7	Q02543;M0R3D6;M0R1A7;M0R117;M0R0P7	-0.0714167	-0.0927492	-0.28418	0.210932					0.521729	0.529599	0.585417	0.410308	0.0396706	0.0629167	0.587169	-0.528849	0.0402795	0.103932	0.22991	-0.0725118	9	9	9	9	6	7	9	9	9	9	10	9	6	8	8	9
RPL19	Ribosomal protein L19;60S ribosomal protein L19	J3QR09;J3KTE4;P84098;J3QL15	J3QR09;J3KTE4;P84098;J3QL15	-0.055633	-0.361009	0.0291635	-0.163633					0.51693	0.613727	0.491167	0.569816	0.119838	0.0127444	0.0836714	-0.121029	-0.138921	0.0542635	0.0983266	0.017848	9	8	7	7	6	6	6	7	7	10	8	7	6	7	6	8
RPL21	60S ribosomal protein L21	P46778;G3V1B3;M0R181	P46778	0.00529057	-0.0395449	0.0847439	-0.175886					0.49839	0.512629	0.474348	0.574984	-0.00503429	0.0236026	0.350155	-0.329785	0.130761	0.0562381	-0.387117	0.389654	4	6	5	5	4	4	3	3	5	5	5	5	4	4	4	5
RPL22	60S ribosomal protein L22	P35268;K7ERI7;K7EJT5;K7EP65;K7EKS7;K7ELC4;K7EMH1	P35268;K7ERI7;K7EJT5;K7EP65;K7EKS7;K7ELC4;K7EMH1	-0.766936	-0.107864	-0.629543	0.101834					0.720793	0.534411	0.683674	0.456414	-0.0249698	-0.0375936	0.256731	-0.389523	-0.211885	0.12908	0.0964047	-0.171849	2	2	2	3	1	2	2	2	2	2	3	3	1	2	2	2
RPL22L1	60S ribosomal protein L22-like 1	C9JYQ9;Q6P5R6;H0Y8C2	C9JYQ9;Q6P5R6;H0Y8C2	-0.826222	0.327254	1.902	-0.860174					0.735795	0.396653	0.0743485	0.822437	0.664862	0.361989	0.623044	-0.453868	NaN	0.242349	0.63286	-0.756789	0	0	2	2	2	2	1	1	0	1	2	2	1	0	1	2
RPL23	60S ribosomal protein L23	P62829;C9JD32;J3KT29;J3KTJ3;B9ZVP7;J3QQT9	P62829;C9JD32;J3KT29;J3KTJ3;B9ZVP7	-0.44743	0.309601	0.592657	0.053203					0.6336	0.402111	0.326358	0.477196	0.00553374	0.0625102	0.881881	-1.04921	0.18109	0.18915	0.266792	-0.185009	8	8	7	7	8	7	6	6	8	8	6	8	8	6	7	7
RPL23A	60S ribosomal protein L23a	P62750;H7BY10;K7EJV9;K7ERT8;A8MUS3;K7EMA7;REV__Q969S3	P62750;H7BY10;K7EJV9;K7ERT8;A8MUS3;K7EMA7	-0.274115	-0.567718	0.147595	0.255061					0.582838	0.675284	0.455386	0.391969	0.115416	0.054687	0.113582	-0.136905	0.096868	0.0533397	0.0752961	0.0424601	10	11	11	11	7	8	8	9	10	9	8	10	7	7	7	8
RPL24	60S ribosomal protein L24	C9JXB8;C9JNW5;P83731	C9JXB8;C9JNW5;P83731	-0.355296	-0.249264	0.562629	0.342284					0.606844	0.579094	0.33462	0.356453	0.0979787	0.0687206	0.143467	-0.153205	0.0122935	0.0642192	-0.143974	0.0286447	9	10	10	9	7	8	9	9	10	11	8	8	6	7	7	9
RPL26;KRBA2	60S ribosomal protein L26	P61254;J3QRI7;J3QQQ9;J3QQV1;J3KTJ8;J3QRC4;J3KSS0;J3KS10	P61254;J3QRI7;J3QQQ9;J3QQV1;J3KTJ8;J3QRC4;J3KSS0	-0.418814	-0.395736	0.165672	-0.17322					0.625353	0.624322	0.449949	0.573861	0.121088	0.119984	0.270049	-0.247034	-0.000397633	0.154477	0.29011	-0.204171	5	6	8	8	5	7	6	7	6	7	7	8	7	8	6	7
RPL26L1	60S ribosomal protein L26-like 1	Q9UNX3;E5RIT6;E5RHH1	Q9UNX3;E5RIT6	0.294579	-0.221313	-0.0970906	-0.493266					0.411077	0.570323	0.529383	0.702036	-0.369502	-0.260257	-0.068237	-0.162082	NaN	-0.423671	NaN	NaN	1	0	1	1	0	0	0	0	0	0	1	1	0	0	0	1
RPL27	60S ribosomal protein L27	P61353;K7ELC7;K7EQQ9;K7ERY7	P61353;K7ELC7;K7EQQ9	-0.113733	0.192069	-0.197017	0.0699876					0.534578	0.438891	0.559456	0.470013	0.0736303	0.0812823	0.419436	-0.491821	0.0127526	0.131725	0.0962915	-0.155584	6	6	5	6	5	6	6	5	6	6	5	6	6	5	6	5
RPL27A	60S ribosomal protein L27a	P46776;E9PLL6;E9PJD9;E9PLX7;H0YF34;E9PKT2	P46776;E9PLL6;E9PJD9;E9PLX7	-0.263948	-0.218679	0.249782	-0.455109					0.579808	0.569495	0.42479	0.687666	0.026872	0.060421	0.539757	-0.521875	-0.114115	0.0719194	0.0182528	-0.0097837	4	4	5	5	4	6	5	5	4	4	5	5	5	4	5	5
RPL28	60S ribosomal protein L28	P46779;P46779-2;P46779-3;H0YKD8;P46779-4;P46779-5;H0YMF4;H0YLP6	P46779;P46779-2;P46779-3;H0YKD8;P46779-4;P46779-5;H0YMF4;H0YLP6	0.0761486	-0.142212	0.422731	-0.102523					0.476833	0.545327	0.374116	0.543879	0.126439	0.0120803	0.0858802	-0.143141	0.202227	0.0645784	0.000873799	-0.0410679	7	10	10	10	11	11	9	10	10	9	9	11	10	10	10	9
RPL29	60S ribosomal protein L29	P47914	P47914	-0.684762	-0.370386	-0.0822121	-0.205218					0.699338	0.616597	0.524887	0.587302	0.230174	0.0296301	0.187818	-0.141166	0.163081	0.194933	0.0234102	0.148921	2	2	2	2	2	2	2	2	2	2	2	2	2	2	2	2
RPL3	60S ribosomal protein L3	P39023;G5E9G0;H7C422;B5MCW2;H7C3M2;F8WCR1;Q92901	P39023;G5E9G0;H7C422;B5MCW2;H7C3M2	-0.455058	-0.375813	-0.556844	-0.0638946					0.635789	0.618255	0.663779	0.527381	0.149255	0.0736496	0.301206	-0.28042	-0.0115197	0.0173254	-0.327917	0.323208	16	16	14	15	11	13	10	14	16	19	15	16	13	16	13	12
RPL30	60S ribosomal protein L30	P62888;E5RI99;A0A0C4DH44;A0A0B4J213;E5RJH3	P62888;E5RI99;A0A0C4DH44	0.2571	0.0498355	0.475449	0.204426					0.422236	0.484086	0.35905	0.413029	0.0300454	0.0766264	0.463724	-0.51909	0.0422578	0.192552	0.275725	-0.311462	4	4	5	6	4	5	5	4	3	4	4	5	4	6	4	4
RPL31	60S ribosomal protein L31	P62899;H7C2W9;C9JU56;B7Z4E3;P62899-3;P62899-2;B7Z4C8;B8ZZK4	P62899;H7C2W9;C9JU56;B7Z4E3;P62899-3;P62899-2;B7Z4C8;B8ZZK4	-0.285258	0.18642	0.164066	-0.290071					0.586154	0.440674	0.450431	0.622415	0.0107653	0.0074447	0.24875	-0.326775	0.0785241	0.183405	0.0522648	-0.0928808	4	6	6	6	4	6	5	4	2	6	6	7	4	5	6	5
RPL32	60S ribosomal protein L32	P62910;F8W727;D3YTB1;D3YTI8	P62910;F8W727;D3YTB1	-0.119169	-0.545278	0.756375	0.383139					0.536226	0.668794	0.282883	0.340215	0.0915119	0.0404586	0.16463	-0.21955	-0.0966222	0.0616676	0.0883541	0.113914	5	6	7	6	4	6	2	4	7	9	6	7	3	5	1	3
RPL34	60S ribosomal protein L34	P49207	P49207	0.0943361	-0.2135	-0.0614625	-0.0233729					0.471308	0.567865	0.518611	0.510023	0.0700053	0.0552778	0.264939	-0.319609	-0.0177188	0.122371	-0.345161	0.305281	4	3	5	4	3	4	4	5	4	4	4	4	4	4	3	4
RPL35	60S ribosomal protein L35	P42766;F2Z388	P42766;F2Z388	-0.873743	-0.15776	0.103641	-0.00017138					0.747517	0.550258	0.468639	0.500073	0.108019	-0.0538078	0.11704	-0.161883	-0.0304929	0.0954171	0.420182	-0.319603	6	6	5	6	4	5	5	5	6	5	5	6	5	5	5	5
RPL35A	60S ribosomal protein L35a	P18077;C9K025;F8WBS5;F8WB72	P18077;C9K025;F8WBS5;F8WB72	-0.300204	0.298674	0.160683	-0.115025					0.590591	0.405499	0.451448	0.549205	0.0102054	0.0062038	0.437995	-0.492032	0.100802	0.0865935	0.295926	-0.0707557	7	7	7	7	6	6	7	8	7	7	7	7	7	6	7	8
RPL36	60S ribosomal protein L36	Q9Y3U8;J3QSB5;J3KTD3	Q9Y3U8;J3QSB5	-0.574279	0.335904	1.51404	-0.680914					0.669378	0.393985	0.125159	0.767911	-0.00818498	0.0668362	0.290055	-0.348109	0.214064	-0.0182673	-0.15949	0.0160571	2	3	4	3	3	5	1	1	4	3	4	3	2	2	2	1
RPL36A	60S ribosomal protein L36a	P83881;J3KQN4;H0Y5B4;H7BZ11;R4GN19;H7BY91;H0Y3V9	P83881;J3KQN4;H0Y5B4;H7BZ11	-0.0212791	0.284421	-0.576944	0.565004					0.506477	0.409929	0.669329	0.271799	0.291922	0.147827	0.144955	-0.0983464	0.208852	0.606291	NaN	NaN	1	1	2	0	0	1	0	0	2	2	1	0	1	1	0	0
RPL36AL	60S ribosomal protein L36a-like	Q969Q0	Q969Q0	-1.63449	-0.623834	-0.68296	0.847567					0.893833	0.69128	0.697965	0.181111	-0.00372622	0.00158921	0.54926	-0.784052	0.0661967	0.0845302	-0.229113	0.083167	6	7	7	5	2	4	3	4	6	6	4	5	4	3	3	4
RPL37A	60S ribosomal protein L37a	P61513;C9J4Z3;Q6P4E4;E9PEL3;G5E9R3;M0R0A1;M0R2L6;A6NKH3	P61513;C9J4Z3;Q6P4E4;E9PEL3;G5E9R3;M0R0A1;M0R2L6	-0.908407	-0.026705	0.183431	0.0841867					0.755891	0.508529	0.444616	0.463944	-0.0461933	0.0750849	0.707913	-0.78967	-0.0899108	0.172112	0.266986	-0.426064	4	4	5	4	4	3	3	1	5	5	5	4	5	4	3	3
RPL38	60S ribosomal protein L38	P63173;J3KT73;J3QL01;J3KSP2	P63173;J3KT73;J3QL01;J3KSP2	-0.79674	-0.179193	0.306027	-0.0164209					0.728386	0.557042	0.408129	0.507042	0.0744353	0.0394844	0.223992	-0.319647	-0.0100576	0.0972834	0.0860343	-0.145497	6	4	6	6	5	4	4	4	6	6	6	6	3	3	4	4
RPL39P5;RPL39	Putative 60S ribosomal protein L39-like 5;60S ribosomal protein L39	Q59GN2;P62891	Q59GN2;P62891	-0.68458	-0.0169571	-0.0503455	-0.599007					0.69929	0.505416	0.515246	0.740191	-0.611441	NaN	0.8623	NaN	NaN	NaN	NaN	NaN	1	1	1	1	1	1	1	1	1	1	1	1	1	0	1	1
RPL4	60S ribosomal protein L4	P36578;H3BM89;H3BTP7;H3BU31	P36578;H3BM89	-0.391731	-0.360197	-0.139802	0.0636574					0.617494	0.613479	0.542268	0.472721	0.207862	0.10595	0.224635	-0.194901	-0.110816	0.027796	-0.101456	0.216392	16	14	18	18	10	7	10	15	18	20	19	18	13	11	11	14
RPL5	60S ribosomal protein L5	P46777;Q5T7N0;R4GNJ2	P46777	-0.446648	-0.542006	-0.479843	-0.524471					0.633376	0.667843	0.642196	0.713558	0.0902721	0.124817	0.485856	-0.541528	-0.0773348	-0.100769	0.226675	-0.251512	5	6	7	4	4	4	3	2	5	6	7	6	5	5	4	2
RPL6	60S ribosomal protein L6	Q02878;F8VZ45;U3KQR5;F8VR69;F8VZA3;F8VWR1;F8VU16	Q02878	-0.309843	-0.244142	-0.163049	-0.444083					0.593447	0.57749	0.549263	0.683458	0.271416	0.136703	0.0595586	-0.0817664	-0.0269564	0.0752812	-0.193887	0.224911	14	14	16	16	11	11	10	11	17	17	17	15	13	12	10	14
RPL7	60S ribosomal protein L7	P18124;A8MUD9;C9JIJ5;C9JZ88	P18124;A8MUD9	-0.318191	-0.105533	-0.421732	0.188607					0.595916	0.533669	0.625596	0.419664	0.207177	0.0797425	0.0655097	-0.0899229	0.0156549	0.0707823	-0.206228	0.29203	11	12	14	14	8	6	7	11	9	14	13	13	8	8	6	6
RPL7A	60S ribosomal protein L7a	P62424;Q5T8U2	P62424;Q5T8U2	-0.443901	-0.464395	-0.423884	-0.213107					0.632587	0.644989	0.626215	0.590601	0.191096	0.0949926	0.156946	-0.154204	0.0103065	0.0445969	-0.278673	0.346329	11	12	16	16	10	11	9	11	12	10	15	15	12	11	13	12
RPL8	60S ribosomal protein L8	P62917;E9PKZ0;G3V1A1;E9PKU4;E9PP36	P62917;E9PKZ0;G3V1A1;E9PKU4;E9PP36	-0.446306	-0.361515	0.439336	0.182521					0.633278	0.613883	0.369349	0.422222	0.203399	0.0850598	0.267838	-0.165977	0.0484166	0.0663896	-0.229693	0.23622	12	13	10	10	8	8	7	11	11	13	10	11	7	9	10	10
RPL9	60S ribosomal protein L9	P32969;D6RAN4;H0Y9V9;E7ESE0;H0Y9R4	P32969;D6RAN4;H0Y9V9;E7ESE0;H0Y9R4	-0.188398	-0.231734	-0.173666	-0.0280269					0.557153	0.573598	0.552453	0.512018	0.0252972	0.105664	0.410185	-0.414501	0.0329211	0.100255	-0.0175941	0.0240314	7	8	8	8	7	8	7	7	7	7	8	9	7	7	5	8
RPLP0;RPLP0P6	60S acidic ribosomal protein P0;60S acidic ribosomal protein P0-like	P05388;P05388-2;F8VWS0;F8VU65;F8VPE8;G3V210;F8VW21;Q8NHW5;F8VQY6;F8VRK7;F8VZS0;F8VS58;F8VWV4;F8W1K8	P05388;P05388-2;F8VWS0;F8VU65;F8VPE8;G3V210;F8VW21;Q8NHW5;F8VQY6;F8VRK7;F8VZS0;F8VS58	-0.217661	0.00531436	1.88226	-0.179908					0.565954	0.498302	0.0764789	0.576678	-0.0427867	0.0785769	0.674205	-0.459275	-0.071545	-0.0237241	0.497464	-0.49413	3	4	9	9	4	3	1	4	2	5	10	9	1	2	1	4
RPLP1	60S acidic ribosomal protein P1	P05386	P05386	0.482772	0.621743	-0.0970906	0					0.356298	0.30931	0.529383	0.5	0.0648492	-0.0771013	NaN	NaN	-0.307283	0.00307461	NaN	NaN	0	1	2	1	0	0	0	0	0	1	1	1	0	0	0	0
RPN1	Dolichyl-diphosphooligosaccharide--protein glycosyltransferase subunit 1	P04843;B7Z4L4;F8WF32	P04843;B7Z4L4	-0.551171	-0.14323	-0.141436	-0.34243					0.662963	0.54565	0.54276	0.643606	-0.440811	-0.617564	0.0594668	-0.488585	-0.68646	-0.586769	0.0316812	-0.452144	18	23	29	29	23	22	22	24	20	27	31	29	23	24	23	28
RPN2	Dolichyl-diphosphooligosaccharide--protein glycosyltransferase subunit 2	P04844-2;P04844;Q5JYR7;Q5JYR4;Q5JYR3;F2Z3K5;H0Y5M1	P04844-2;P04844	-0.796429	-0.550329	-0.861645	-0.266204					0.728308	0.670259	0.743518	0.612626	-0.624075	-0.831161	-0.123984	-0.54195	-0.820633	-0.857251	-0.105137	-0.469846	2	4	10	9	5	5	7	7	3	9	11	10	6	4	5	5
RPP30	Ribonuclease P protein subunit p30	P78346;P78346-2;Q5VU10;Q5VU11	P78346;P78346-2;Q5VU10;Q5VU11	-1.26136	-0.359996	-0.761176	0.169495					0.832092	0.613417	0.718349	0.42771	0.423381	0.502023	0.115593	0.102274	0.391301	0.488599	0.130356	0.471196	2	2	3	3	3	3	2	2	2	3	4	4	3	2	2	3
RPP40	Ribonuclease P protein subunit p40	A0A087X1N3;O75818-2;O75818;F8WC38;X6RLL4	A0A087X1N3;O75818-2;O75818;F8WC38;X6RLL4	1.47808	0.197624	1.48787	-1.29347					0.129697	0.437137	0.129299	0.91781	0.444779	0.651414	NaN	NaN	0.173506	0.579739	NaN	0.291288	2	4	2	3	2	2	0	1	1	1	2	1	1	1	1	1
RPS10	40S ribosomal protein S10	P46783;F6U211;S4R435;Q9NQ39	P46783;F6U211;S4R435	0.535822	0.433551	0.57479	0.64508					0.341324	0.364247	0.331264	0.244009	-0.0775051	0.0717587	0.386447	-0.371631	0.071258	0.0866278	0.311288	-0.150679	12	11	11	12	7	6	8	9	9	9	11	11	6	6	5	8
RPS11	40S ribosomal protein S11	P62280;M0QZC5;M0R1H5;M0R1H6	P62280;M0QZC5	-0.0620133	-0.170777	-0.00148476	-0.0577809					0.51887	0.55438	0.50045	0.524764	0.0167449	-0.027764	0.237506	-0.202871	0.0466091	0.0141113	-0.195145	0.139748	12	12	13	14	12	12	13	12	12	12	13	14	12	12	14	12
RPS12	40S ribosomal protein S12	P25398	P25398	-0.0221369	0.0895487	-0.146271	-0.49888					0.506738	0.471421	0.544216	0.704124	0.118472	0.0749682	0.26233	-0.265501	0.103934	0.157435	0.518939	-0.296167	5	5	7	7	4	4	4	3	5	5	7	7	4	4	4	4
RPS13	40S ribosomal protein S13	P62277;J3KMX5;E9PS50	P62277;J3KMX5	-0.0876994	0.236019	-0.0967702	-0.0286468					0.526676	0.425057	0.529286	0.512284	-0.143921	-0.0900898	0.262438	-0.333971	-0.155794	-0.0237169	0.368298	-0.421052	7	8	8	8	4	6	5	7	8	6	8	8	5	7	5	7
RPS14	40S ribosomal protein S14	P62263;H0YB22;E5RH77	P62263;H0YB22;E5RH77	0.172654	0.0391192	0.0772722	-0.239997					0.447594	0.487507	0.476607	0.601796	0.00395436	-0.0412305	0.242169	-0.393649	-0.0513985	-0.00597016	0.0965636	-0.204554	6	6	6	6	6	5	4	4	6	7	5	6	5	5	5	5
RPS15	40S ribosomal protein S15	P62841;K7ELC2;K7EM56;A0A0B4J2B4;S4R417;K7EQJ5;K7EJ78;S4R456	P62841;K7ELC2;K7EM56;A0A0B4J2B4;S4R417;K7EQJ5;K7EJ78;S4R456	0.128596	-0.185659	1.33921	-0.119066					0.460917	0.559085	0.154616	0.550924	-0.149779	0.0218629	0.355348	-0.359323	-0.0518136	-0.0740095	0.417671	-0.263456	3	3	3	3	2	2	2	2	4	4	3	4	2	2	2	3
RPS15A	40S ribosomal protein S15a	P62244;I3L3P7;I3L246;H3BN98;H3BV27;H3BT37;I3L303;H3BVC7	P62244;I3L3P7;I3L246;H3BN98	-0.292288	0.312008	0.199797	0.0484257					0.588242	0.401366	0.439711	0.479241	-0.112748	-0.0768553	0.254414	-0.397139	0.111179	0.0506233	-0.117881	0.0903709	7	7	7	7	7	7	7	6	7	7	7	7	7	7	6	6
RPS16	40S ribosomal protein S16	M0R210;P62249;A0A087WZ27;M0R3H0;M0R1M5;M0QX76;Q6IPX4	M0R210;P62249;A0A087WZ27;M0R3H0	-0.0211724	-0.165171	-0.242444	0.651558					0.506445	0.552605	0.573026	0.24183	-0.169848	-0.100913	0.588721	-0.739758	-0.251467	-0.0853723	0.621186	-0.65978	11	10	11	12	5	8	7	8	6	10	11	12	7	8	4	7
RPS17L;RPS17	40S ribosomal protein S17-like;40S ribosomal protein S17	P0CW22;P08708;H0YN88;A0A075B716;H0YN73;H3BNC9	P0CW22;P08708;H0YN88;A0A075B716	-0.118923	0.257057	-0.282062	0.00409377					0.536151	0.418467	0.58479	0.498244	-0.0863874	-0.0586368	0.475533	-0.545798	-0.0223889	-0.0521778	0.369501	-0.366839	6	7	8	8	4	4	6	5	8	7	8	9	4	5	4	5
RPS18	40S ribosomal protein S18	P62269;J3JS69	P62269	-0.538033	0.0141657	-0.0147554	-0.42142					0.659294	0.495475	0.504469	0.674736	-0.130401	-0.018085	0.362045	-0.508306	-0.147275	-0.0359093	0.313375	-0.344741	7	6	12	10	5	6	7	8	7	6	9	12	6	6	8	8
RPS19	40S ribosomal protein S19	P39019;A0A075B6E2;M0R2L9;M0QXK4;M0QYF7;M0R140	P39019;A0A075B6E2	1.02298	-0.235845	0.930894	-0.247316					0.217528	0.574888	0.239843	0.604829	-0.0606102	-0.081955	0.15356	-0.277242	-0.20506	-0.0260768	0.233517	-0.00321534	5	6	7	8	1	1	1	1	3	2	8	7	0	2	3	1
RPS2	40S ribosomal protein S2	P15880;H0YEN5;E9PMM9;E9PQD7;I3L404;E9PPT0;E9PM36;H3BNG3;H0YE27	P15880;H0YEN5;E9PMM9;E9PQD7;I3L404;E9PPT0;E9PM36	-0.296336	-0.312743	-0.149227	0.0377528					0.589444	0.598862	0.545105	0.483814	-0.0926782	0.109201	0.701967	-0.753596	-0.12263	0.127743	0.342411	-0.493448	16	17	16	15	11	12	10	10	17	17	15	16	11	11	9	11
RPS20	40S ribosomal protein S20	P60866;P60866-2;E5RJX2;G3XAN0;E5RIP1	P60866;P60866-2;E5RJX2;G3XAN0	-0.240068	0.124661	0.285603	0.0391758					0.572672	0.460247	0.414162	0.483204	-0.112444	-0.0579919	0.267556	-0.307862	0.0643567	0.0909055	0.19134	-0.216278	2	4	3	4	3	3	3	3	4	3	3	4	3	3	2	3
RPS21	40S ribosomal protein S21	Q8WVC2;P63220;Q9BYK1;Q9BYK2	Q8WVC2;P63220;Q9BYK1	-0.491476	0.699948	1.29821	-1.15243					0.646175	0.287595	0.16214	0.892304	-0.0681861	0.0165523	0.573073	-0.784654	NaN	0.0913426	0.324662	NaN	2	0	3	3	2	1	0	0	1	2	2	2	1	1	0	2
RPS23	40S ribosomal protein S23	P62266;D6RD47;D6RDJ2;D6RIX0;D6R9I7	P62266;D6RD47	-0.260073	0.189525	0.181593	0.582997					0.578652	0.439694	0.445168	0.26542	-0.121121	-0.0768834	0.532239	-0.632628	0.0214329	0.0577078	-0.0521217	-0.0461144	6	6	7	7	5	6	6	6	7	6	7	7	6	6	6	5
RPS24	40S ribosomal protein S24	P62847-2;E7ETK0;P62847-3;A0A087WUS0;P62847;P62847-4	P62847-2;E7ETK0;P62847-3;A0A087WUS0;P62847;P62847-4	-0.605189	-0.0162387	0.0668347	-0.0453785					0.67788	0.505187	0.479764	0.519454	-0.0982183	0	0.150509	-0.199262	0.0440635	0.000315786	-0.156721	0.0774236	4	4	5	5	2	5	2	4	4	6	5	5	3	4	5	3
RPS25	40S ribosomal protein S25	P62851;E9PQK3;E9PK60	P62851	-0.146231	0.111057	0.231849	-0.37257					0.544421	0.464573	0.430132	0.655611	-0.0463807	-0.0680394	0.238102	-0.286186	0.00714725	-0.0558106	0.420372	-0.317578	5	6	5	6	4	5	5	4	6	6	5	5	5	5	5	5
RPS26;RPS26P11	40S ribosomal protein S26;Putative 40S ribosomal protein S26-like 1	P62854;Q5JNZ5	P62854;Q5JNZ5	-0.286441	-0.041968	0.755718	0.355137					0.586505	0.513403	0.283052	0.351314	-0.224208	-0.0194398	0.517161	-0.736274	-0.038297	0.134148	0.306277	-0.674146	4	4	4	4	4	4	4	4	4	4	4	4	2	3	3	3
RPS27	40S ribosomal protein S27	P42677;Q5T4L4	P42677;Q5T4L4	-0.545054	-0.192711	0.300992	0.430505					0.661257	0.561312	0.409614	0.321755	0.490051	0.252596	0.429529	-0.259865	0.335	0.30011	0.163782	0.113661	4	3	4	4	4	4	5	5	4	4	4	4	4	4	5	5
RPS27A;UBB;UBC;UBA52	Ubiquitin-40S ribosomal protein S27a;Ubiquitin;40S ribosomal protein S27a;Polyubiquitin-B;Ubiquitin;Polyubiquitin-C;Ubiquitin	P62979;J3QS39;J3QTR3;F5H6Q2;F5GYU3;F5H2Z3;F5H265;B4DV12;F5H388;F5H747;F5GXK7;J3QKN0;Q5PY61;P0CG47;Q96C32;P0CG48;M0R1M6;M0R1V7;J3QLP7;J3QRK5;J3QSA3;K7EMA8;F5GZ39;J3KSM4	P62979;J3QS39;J3QTR3;F5H6Q2;F5GYU3;F5H2Z3;F5H265;B4DV12;F5H388;F5H747;F5GXK7;J3QKN0;Q5PY61;P0CG47;Q96C32;P0CG48;M0R1M6	-0.0439328	-0.236387	0.303552	-0.0710956					0.513371	0.575058	0.408859	0.530461	0.480427	0.0525933	-0.0911812	-0.0149617	0.514678	0.142466	-0.223207	-0.0450122	7	7	7	7	5	4	6	6	5	6	7	7	4	4	6	5
RPS27L	40S ribosomal protein S27-like;40S ribosomal protein S27	Q71UM5;H0YMV8;C9JLI6;C9J1C5	Q71UM5;H0YMV8;C9JLI6	-0.0820382	0.0565719	0.0754144	0.0277815					0.524957	0.481936	0.477169	0.488087	-1.28998	-0.798734	-0.425793	-0.413605	-1.13382	-0.801093	-0.609805	-0.189428	1	1	1	1	1	1	1	1	1	1	1	1	1	1	1	1
RPS28	40S ribosomal protein S28	P62857	P62857	0.0462945	-0.0987874	2.51404	-0.0681843			+		0.485911	0.531522	0.0281403	0.529216	-0.0229291	-0.014811	0.596494	-0.691303	-0.00704121	0.0633052	0.712665	NaN	3	2	3	2	3	3	2	1	2	2	3	3	1	2	2	1
RPS29	40S ribosomal protein S29	P62273;P62273-2;A0A087WTT6	P62273;P62273-2;A0A087WTT6	-0.297519	0.84118	-0.0970906	0.189618					0.589795	0.250313	0.529383	0.419239	-0.165871	0.0631647	0.520296	-0.562931	NaN	-0.136933	NaN	-0.406181	0	0	2	1	0	1	2	2	0	0	2	1	1	0	1	1
RPS3	40S ribosomal protein S3	P23396;P23396-2;E9PL09;E9PPU1;H0YEU2;F2Z2S8;H0YCJ7;H0YF32;E9PQ96;E9PJH4;E9PK82;E9PSF4;E9PQX2;H0YES8;E9PJN9	P23396;P23396-2;E9PL09;E9PPU1;H0YEU2;F2Z2S8;H0YCJ7	0.191957	-0.130778	-0.172708	-0.250873					0.441775	0.541697	0.552165	0.606301	0.012755	0.0930823	0.370339	-0.441241	-0.14907	0.113377	0.16423	-0.353292	20	18	18	17	17	17	17	18	18	17	17	18	18	19	19	16
RPS3A	40S ribosomal protein S3a	P61247;H0Y9Y4;D6RG13;E9PFI5;D6RAT0;H0Y8L7;D6RB09;D6R9B6;D6RAS7;D6RI02;D6RED7;D6RGE0	P61247;H0Y9Y4;D6RG13;E9PFI5;D6RAT0;H0Y8L7;D6RB09;D6R9B6	-0.289069	-0.247221	0.134433	-0.240261					0.587286	0.578454	0.45935	0.601905	0.0812485	0.0507333	0.296099	-0.189374	-0.0672834	0.0648718	0.296485	-0.300807	13	14	16	16	9	12	11	13	11	13	17	15	11	10	12	11
RPS4X	40S ribosomal protein S4, X isoform	P62701;A6NH36	P62701	-0.221379	-0.0953025	-0.251892	-0.185795					0.56707	0.530412	0.575837	0.579154	0.0160173	0.0287591	0.487423	-0.422467	-0.0744728	0.0501933	0.223158	-0.232399	14	16	15	16	11	12	12	15	15	14	15	17	13	12	13	12
RPS4Y1	40S ribosomal protein S4, Y isoform 1	C9JEH7;P22090	C9JEH7;P22090	-1.50324	-0.378257	-1.72815	0.931816					0.874314	0.619001	0.905264	0.158243	-0.6012	-0.151042	-0.090854	-0.143994	1.18859	-0.306787	NaN	-0.0768944	1	1	3	2	0	2	1	1	2	2	3	2	4	2	1	0
RPS5	40S ribosomal protein S5;40S ribosomal protein S5, N-terminally processed	M0R0F0;P46782;M0R0R2;M0QZN2	M0R0F0;P46782;M0R0R2;M0QZN2	0.228646	0.0440171	-1.46007	-0.324893					0.43075	0.485943	0.866198	0.636554	-0.0261152	0.0201363	0.607125	-0.706891	0.0769482	0.03073	0.58422	-0.584875	5	9	7	9	2	2	3	3	4	7	9	10	2	4	3	5
RPS6	40S ribosomal protein S6	P62753;A2A3R5;A2A3R7	P62753;A2A3R5	-0.219268	-0.254347	-0.260161	-0.0903794					0.566437	0.580685	0.578295	0.5387	0.0301167	0.0166464	0.261939	-0.231982	-0.0246783	0.0393293	-0.161865	0.120085	9	8	11	11	9	9	8	11	10	11	12	12	10	11	10	11
RPS6KA3	Ribosomal protein S6 kinase alpha-3	P51812;B1AXG1;Q15418-3;B7Z3B5;Q15418-4;E9PGT3;Q15349;Q15418;Q15349-3;Q15418-2;Q9UK32-2;Q9UK32;Q15349-2;F2Z2J1;E9PMM7;D6R910;B1AXG2;Q5SVM6	P51812	3.79121	2.43695	2.88226	1.28889	+	+	+		0.00190899	0.0255176	0.0143188	0.0829392	NaN	-0.161821	NaN	NaN	-0.236118	0.0522677	0.36541	0.0367367	4	5	5	3	2	2	0	1	0	0	0	0	0	0	0	0
RPS7	40S ribosomal protein S7	P62081;B5MCP9	P62081;B5MCP9	-0.200222	0.0887285	0.209161	-0.204374					0.560713	0.471682	0.436909	0.586949	0.081003	0.0222195	0.143642	-0.152582	0.0416451	0.0742151	-0.0205107	-0.071427	11	10	11	11	7	7	7	7	10	10	10	12	7	6	6	9
RPS8	40S ribosomal protein S8	P62241;Q5JR95	P62241;Q5JR95	-0.135173	-0.135799	-0.085156	-0.14376					0.541075	0.543292	0.525776	0.561409	0.00813597	0.0248762	0.285689	-0.299688	-0.0687229	0.0424253	-0.143298	-0.0431083	10	10	9	10	8	8	8	9	9	9	11	11	7	8	7	9
RPS9	40S ribosomal protein S9	P46781;B5MCT8;C9JM19;F2Z3C0;A8MXK4	P46781;B5MCT8;C9JM19	-0.0535345	-0.101473	-0.449025	-0.333979					0.516292	0.532377	0.633424	0.640214	-0.244344	-0.055953	0.683285	-0.68884	-0.234507	-0.0257361	0.464559	-0.566048	14	15	16	16	14	15	14	13	14	14	17	16	16	16	14	14
RPSA;RPSAP58	40S ribosomal protein SA	C9J9K3;P08865;A0A0C4DG17;A6NE09;C9JQR9	C9J9K3;P08865;A0A0C4DG17;A6NE09	-0.317112	-0.00857778	-0.0463576	-0.0429085					0.595597	0.50274	0.514039	0.518395	-0.0224034	0.0318571	0.566585	-0.650591	-0.303693	0.0291977	0.430559	-0.516542	7	8	10	8	3	3	3	7	5	8	10	8	4	3	4	5
RRAS	Ras-related protein R-Ras	P10301;E9PQK5;E9PQC5	P10301	0.476552	0.00957253	0.902909	-0.847133					0.358069	0.496942	0.246495	0.818766	-1.4222	-1.28776	NaN	0.059538	-1.30341	-1.02733	-1.08574	0.292337	2	4	4	3	1	1	1	3	2	4	4	2	0	1	1	4
RRBP1	Ribosome-binding protein 1	Q9P2E9;A0A0A0MRV0;A0A087WVV2;F8W7S5;A0A087WU26;A2A2S5;V9GY78;REV__Q9P2M7;Q8N4C6-6;Q8N4C6-11;H9KV85;E9PN67;Q8N4C6-9;Q8N4C6-2;Q8N4C6;Q8N4C6-5;Q8N4C6-10;Q8N4C6-7	Q9P2E9;A0A0A0MRV0;A0A087WVV2;F8W7S5	-0.406374	-0.512307	1.38574	-0.170706					0.621749	0.659166	0.146363	0.572801	-1.18334	-1.25453	0.024067	-1.15357	-1.16056	-1.29552	0.12553	-1.07705	24	18	29	27	5	6	13	13	18	23	31	29	4	1	13	16
RRM1	Ribonucleoside-diphosphate reductase large subunit	P23921;E9PL69;E9PP77;H0YCY7	P23921;E9PL69	0.280273	-0.913374	-0.48369	0.60208					0.415329	0.767704	0.643286	0.258738	0.943114	NaN	-0.758265	1.68255	NaN	NaN	-0.878684	1.76743	0	1	0	0	1	3	1	4	0	0	1	0	2	4	0	4
RRM2	Ribonucleoside-diphosphate reductase subunit M2	P31350;P31350-2;C9JXC1;Q7LG56-3	P31350;P31350-2;C9JXC1	-0.363409	-0.0588375	-0.67896	-1.50301					0.609223	0.518787	0.696905	0.946925	NaN	1.89708	0.226308	1.60102	0.709303	1.62314	0.289946	3.20089	0	4	4	2	5	4	2	1	1	2	4	3	5	5	1	7
RRP12	RRP12-like protein	Q5JTH9;Q5JTH9-2;Q5JTH9-3;A0A087X1U8;H7C1M8;A0A087WYW2;A0A087X0G0	Q5JTH9;Q5JTH9-2;Q5JTH9-3	-1.40372	-0.359996	1.17478	0.0734376					0.857935	0.613417	0.1862	0.468538	0.442926	0.337887	0.348756	-0.423536	NaN	NaN	0.64485	NaN	0	1	0	0	3	0	0	1	2	5	0	0	1	0	0	1
RRS1	Ribosome biogenesis regulatory protein homolog	Q15050	Q15050	-0.297519	-0.359996	1.86132	0					0.589795	0.613417	0.07879	0.5	0.148936	0.00818236	0.220915	-0.586508	NaN	NaN	0.157139	NaN	0	0	0	0	2	1	0	0	0	0	0	1	0	0	0	0
RSL1D1	Ribosomal L1 domain-containing protein 1	O76021;J3QSV6;I3L3U9;I3L3C4;O76021-2;I3L234;I3L1A3;J3KPU7;I3L2F2;I3L4T8;I3L1Y4	O76021;J3QSV6;I3L3U9	-0.349146	0.154631	0.298733	-1.50595					0.605038	0.450734	0.410281	0.947266	0.414424	0.403985	0.219783	-0.622408	0.237759	0.204962	0.242967	-0.88074	4	8	2	5	7	7	2	1	4	8	3	4	8	6	1	5
RTCA	RNA 3-terminal phosphate cyclase	O00442;O00442-2;A6NIC1	O00442;O00442-2	0.40867	0.507859	0.514948	1.35422					0.377585	0.342142	0.347903	0.0727244	-0.413912	-0.320947	0.0762049	-1.47396	-0.35765	-0.304778	0.386483	NaN	2	1	2	2	1	1	1	0	1	3	2	1	0	0	0	1
RUVBL1	RuvB-like 1	Q9Y265;Q9Y265-2;E7ETR0;H7C4G5;J3QLR1;H7C4I3	Q9Y265;Q9Y265-2;E7ETR0	1.20468	0.676286	5.96138	5.38497			+	+	0.178992	0.294089	3e-06	3.54e-09	0.617954	0.48945	0.357715	0.225516	0.600198	0.443089	0.3102	0.073533	8	7	9	9	11	9	10	10	3	4	8	6	2	1	0	2
RUVBL2	RuvB-like 2	Q9Y230;Q9Y230-2;M0R0Y3;X6R2L4;M0R0Z0;M0QXI6;M0QXZ7	Q9Y230;Q9Y230-2;M0R0Y3	0.166091	0.309387	2.29803	4.46561			+	+	0.449576	0.402177	0.0405059	7.91e-07	0.5769	0.543909	0.325751	0.0987328	0.572608	0.527041	0.346112	0.0307995	6	7	8	9	9	7	9	8	7	8	8	8	3	2	0	2
S100A10	Protein S100-A10	P60903	P60903	-0.815532	0.162975	0.744985	1.33277					0.733121	0.44809	0.285816	0.0759663	-0.58678	-0.527995	-0.533833	0.244511	NaN	-1.50623	NaN	NaN	1	1	3	2	1	2	1	1	1	1	3	3	1	1	1	1
S100A11	Protein S100-A11	P31949	P31949	-0.169332	0.109796	0.478732	0					0.551403	0.464974	0.358119	0.5	-0.60344	-0.38977	0.073586	-0.475553	-0.44022	-0.166913	0.286176	NaN	4	4	5	5	3	3	1	1	3	3	5	5	1	1	1	1
S100A13	Protein S100-A13	Q99584	Q99584	1.03723	0.947341	-0.0970906	0					0.214343	0.224075	0.529383	0.5	-0.446801	-0.350566	0.640382	-0.844876	-0.280871	0.0778823	NaN	NaN	1	0	2	2	0	0	0	0	0	0	2	2	0	0	0	0
S100A16	Protein S100-A16	Q96FQ6	Q96FQ6	-0.763353	0.932602	-0.0970906	1.35422					0.719873	0.227622	0.529383	0.0727244	0.0956008	0.167318	0.628983	-0.750247	NaN	0.0135192	NaN	NaN	2	0	3	3	0	0	1	0	1	2	2	3	0	0	0	1
S100A6	Protein S100-A6	R4GN98;P06703	R4GN98;P06703	-0.374608	-0.265308	-0.35934	0.0734376					0.612499	0.584111	0.607512	0.468538	-0.60219	-0.610357	0.720111	-1.29023	-0.177414	-0.395384	0.63594	-1.40306	4	2	4	3	2	3	2	2	2	4	3	3	2	2	1	2
S100A7;S100A7A	Protein S100-A7;Protein S100-A7A	P31151;Q86SG5	P31151;Q86SG5	-3.34117	0.695583	-1.53972	0					0.994605	0.288788	0.878814	0.5	NaN	NaN	NaN	NaN	NaN	1.96679	NaN	NaN	0	0	1	1	2	1	0	0	5	0	2	1	3	3	0	0
S100A8	Protein S100-A8;Protein S100-A8, N-terminally processed	P05109	P05109	-1.74908	1.22801	-0.294837	1.20179					0.908997	0.162748	0.588568	0.0981907	1.12871	1.44718	3.19733	NaN	NaN	0.516834	-0.302236	-1.12317	2	1	3	3	2	1	2	1	4	0	2	2	2	2	0	1
S100A9	Protein S100-A9	P06702	P06702	-3.34117	-0.386	-0.539042	1.35422					0.994605	0.621361	0.658834	0.0727244	NaN	NaN	4.54469	2.42069	NaN	0.8248	-2.02269	-2.28713	0	0	3	1	2	2	1	0	3	0	2	2	2	3	0	0
SAE1	SUMO-activating enzyme subunit 1;SUMO-activating enzyme subunit 1, N-terminally processed	M0QZS6;Q9UBE0;M0QX65;Q9UBE0-2;Q9UBE0-3;B3KNJ4	M0QZS6;Q9UBE0;M0QX65;Q9UBE0-2;Q9UBE0-3;B3KNJ4	1.16301	1.69558	-0.0970906	0					0.187428	0.0872961	0.529383	0.5	0.813771	0.695118	NaN	NaN	0.942489	0.663159	NaN	NaN	2	2	2	3	0	0	0	0	0	1	2	2	0	0	0	0
SAMD4B	Protein Smaug homolog 2	A0A087WZT0;A0A087WUK6;M0QZ22;Q5PRF9;M0QY61;M0R0X3	A0A087WZT0;A0A087WUK6;M0QZ22;Q5PRF9;M0QY61;M0R0X3	-0.297519	-0.359996	1.51495	2.33277				+	0.589795	0.613417	0.125017	0.00607523	NaN	NaN	NaN	NaN	NaN	NaN	0.677929	-0.183271	0	0	0	0	2	2	3	2	0	0	0	0	0	0	0	0
SAMHD1	Deoxynucleoside triphosphate triphosphohydrolase SAMHD1	Q9Y3Z3;Q9Y3Z3-4;Q9Y3Z3-2;Q9Y3Z3-3	Q9Y3Z3;Q9Y3Z3-4;Q9Y3Z3-2;Q9Y3Z3-3	5.43215	3.63427	3.93992	4.48142	+	+	+	+	1.7e-05	0.00180809	0.00138806	7.27e-07	0.364215	0.923706	NaN	1.89384	1.12566	2.00672	0.51911	1.65837	23	26	22	17	16	13	12	13	4	2	6	4	3	5	1	2
SAMM50	Sorting and assembly machinery component 50 homolog	Q9Y512	Q9Y512	-3.34075	-1.56799	-0.82658	-1.09261					0.9946	0.895339	0.734868	0.879916	-0.255625	-0.240008	0.00457217	-0.141737	NaN	-0.470075	NaN	0.3368	1	0	2	3	1	0	1	1	4	5	6	5	2	1	2	1
SAP18	Histone deacetylase complex subunit SAP18	X6RAL5;O00422;H7BZW6;U3KPY7;U3KQ12	X6RAL5;O00422;H7BZW6	2.17378	-0.032321	1.48185	-0.182266	+				0.0485913	0.510323	0.130265	0.57767	0.65286	0.398991	0.0168256	0.315371	0.675064	0.490192	0.063912	0.491272	5	5	3	4	5	4	2	2	1	2	3	4	3	1	1	2
SAR1A	GTP-binding protein SAR1a	Q9NR31;Q9NR31-2;Q5SQT8;X1WI22;D6RAA2;H0Y5E8	Q9NR31;Q9NR31-2;Q5SQT8	0.588925	-0.119922	1.28826	-0.140003					0.326582	0.538247	0.164001	0.559816	-0.680474	-0.48575	-0.00755857	-0.193339	-0.669724	-0.480799	-0.0110758	-0.174533	2	3	3	2	2	2	2	2	1	2	3	2	1	1	2	2
SARS	Serine--tRNA ligase, cytoplasmic	P49591;Q5T5C7	P49591;Q5T5C7	-0.997842	-0.141439	-0.681145	-0.585729					0.776787	0.545082	0.697484	0.735542	0.259601	0.26206	-0.459935	0.437005	NaN	0.227311	NaN	NaN	2	1	4	5	0	0	0	1	1	1	6	2	0	1	0	2
SART3	Squamous cell carcinoma antigen recognized by T-cells 3	Q15020;Q15020-4;H0YHU8	Q15020;Q15020-4	0.702481	1.39366	-0.0970906	0					0.295973	0.132243	0.529383	0.5	0.403025	0.341522	-0.00372802	-0.0364833	0.719609	0.405404	NaN	NaN	1	2	4	6	0	0	1	0	0	0	4	2	0	0	0	0
SBDS	Ribosome maturation protein SBDS	Q9Y3A5;A0A087X020;F8WE72	Q9Y3A5;A0A087X020	0.938265	-0.204036	1.75944	-1.02436					0.237018	0.564884	0.0907897	0.864594	-0.1829	-0.205072	-0.230239	0.0448491	-0.199206	-0.242454	-0.395945	0.122677	7	8	7	9	3	5	3	3	3	6	7	8	4	2	4	6
SCAF8;SCAF4	Protein SCAF8;Splicing factor, arginine/serine-rich 15	Q9UPN6;Q9UPN6-2;A0A0A0MT33;O95104-2;O95104-3;O95104	Q9UPN6;Q9UPN6-2;A0A0A0MT33;O95104-2;O95104-3;O95104	1.29458	2.97638	-0.0970906	0		+			0.161623	0.00858419	0.529383	0.5	0.787467	0.443723	0.0198323	0.567836	NaN	0.658411	NaN	NaN	2	1	1	1	0	0	0	0	0	0	1	0	0	0	0	0
SCP2	Non-specific lipid-transfer protein	P22307-6;P22307-2;P22307-4;P22307-7;P22307-8;P22307;H0YF61	P22307-6;P22307-2;P22307-4;P22307-7;P22307-8;P22307;H0YF61	-0.936628	-1.53338	-0.68296	0.0734376					0.762597	0.890224	0.697965	0.468538	-1.62607	-1.15292	NaN	-0.715372	NaN	-1.34961	NaN	NaN	1	1	3	1	0	0	0	1	1	1	5	1	1	0	1	2
SDHA	Succinate dehydrogenase [ubiquinone] flavoprotein subunit, mitochondrial	D6RFM5;P31040-2;P31040;P31040-3;A0A087X1I3;H0Y8X1	D6RFM5;P31040-2;P31040;P31040-3;A0A087X1I3	0.414044	-0.36233	0.460278	0					0.376028	0.614132	0.363365	0.5	-0.346963	1.54842	NaN	NaN	0.441572	0.600629	NaN	NaN	1	1	1	2	1	0	0	0	1	1	1	1	0	0	0	0
SDPR	Serum deprivation-response protein	O95810	O95810	0.294579	1.19896	-0.0970906	0					0.411077	0.168536	0.529383	0.5	NaN	-0.697906	NaN	NaN	NaN	-0.531927	NaN	NaN	1	0	3	1	0	0	0	0	0	0	2	0	0	0	0	0
SEC11A	Signal peptidase complex catalytic subunit SEC11A	P67812-3;H0YNG3;P67812-4;P67812;H0YNX5;H0YNA5;P67812-2;H0YKT4	P67812-3;H0YNG3;P67812-4;P67812;H0YNX5;H0YNA5;P67812-2	0.429252	0.494005	-0.310839	0.0545477					0.371632	0.346225	0.593289	0.47662	-0.474061	-0.60664	-0.416604	-0.369491	-0.465546	-0.589907	-0.222576	-0.40517	4	4	4	5	1	2	2	3	1	2	3	3	3	2	2	3
SEC13	Protein SEC13 homolog	P55735-2;P55735;A0A0C4DFR6;P55735-3;A8MXL6;E7ERC8	P55735-2;P55735;A0A0C4DFR6;P55735-3;A8MXL6	-0.708771	-0.0971537	-0.623244	-0.244856					0.705683	0.531002	0.68197	0.60381	-0.543287	-0.519236	-0.0870142	-0.261762	-0.736258	-0.534645	-0.116502	-0.340284	4	5	6	6	6	4	6	6	6	6	5	7	6	5	5	5
SEC22B	Vesicle-trafficking protein SEC22b	O75396;A0A087X1A9	O75396	-0.724179	-1.53824	-0.539722	0.566704					0.709722	0.890954	0.659024	0.271193	-0.582997	-0.639309	0.269204	-0.682489	-0.680399	-0.444174	0.157399	-0.627903	5	5	2	2	1	1	2	3	4	7	5	2	1	1	2	2
SEC23A	Protein transport protein Sec23A	F5H365;Q15436;Q15436-2;G3V4V1;G3V1W4;G3V3G5;G3V2R6;G3V5X8;G3V4Q2;Q5QPE2;G3V5K1	F5H365;Q15436;Q15436-2	0.05104	0.070767	0.640329	0.908559					0.484467	0.477408	0.313417	0.164357	-0.381681	-0.594232	-0.0453962	-0.099311	-0.79031	-0.618644	0.00729584	-0.190211	7	9	11	10	5	7	7	8	5	6	10	10	5	5	5	8
SEC23IP	SEC23-interacting protein	Q9Y6Y8;Q9Y6Y8-2;H7C0V8;H7C4C4;A0A0C4DH82	Q9Y6Y8;Q9Y6Y8-2	-0.297519	-0.399345	0.460278	0					0.589795	0.625418	0.363365	0.5	-0.501061	-0.12674	NaN	NaN	NaN	-0.795728	NaN	NaN	0	1	3	1	1	0	0	0	0	0	3	2	1	1	0	0
SEC24A	Protein transport protein Sec24A	O95486;O95486-2	O95486	0.776944	-0.913374	-0.0970906	0					0.276646	0.767704	0.529383	0.5	-0.361734	-0.420435	0.513561	0.159927	-0.381594	NaN	NaN	NaN	1	1	0	0	0	0	0	0	1	2	1	0	0	0	0	0
SEC24C	Protein transport protein Sec24C	G5EA31;P53992;P53992-2	G5EA31;P53992	-0.364841	-0.630946	0.184943	-0.0715697					0.609642	0.693283	0.444163	0.530664	-0.425752	-0.37128	0.0346165	-0.20565	-0.0951831	-0.369261	0.114563	-0.20471	6	7	6	5	4	3	6	5	6	5	10	8	3	4	5	9
SEC24D	Protein transport protein Sec24D	E9PDM8;O94855;O94855-2;E9PC44	E9PDM8;O94855;O94855-2;E9PC44	-0.860234	0.105445	-0.0709213	0.0611356					0.744213	0.466359	0.521472	0.4738	-1.06048	-1.01542	-0.0434498	0.0164598	-1.41454	-0.767513	-0.46172	-0.939957	0	2	4	3	1	2	2	3	3	1	5	2	2	1	3	3
SEC31A	Protein transport protein Sec31A	O94979-3;O94979-9;O94979-2;O94979;O94979-8;D6REX3;O94979-6;O94979-10;O94979-4;D6RHZ5;O94979-7;H7BXG7;O94979-5;H0YAB3;H0Y8V7;H0Y9K1;H0Y9T9;H0Y8W8;D6RE64;D6RCQ9;H0YAF5;D6RBT0;D6RHE8;H0Y9V3	O94979-3;O94979-9;O94979-2;O94979;O94979-8;D6REX3;O94979-6;O94979-10;O94979-4;D6RHZ5;O94979-7;H7BXG7;O94979-5	-0.542608	-0.653161	-0.819526	-0.413064					0.660573	0.6995	0.733111	0.671496	-0.854551	-0.721666	-0.204766	-0.572594	-0.968102	-0.710213	-0.230258	-0.55347	16	17	24	20	12	9	11	13	17	17	24	21	12	16	10	17
SEC61A1;SEC61A2	Protein transport protein Sec61 subunit alpha isoform 1;Protein transport protein Sec61 subunit alpha isoform 2	P61619;B4DR61;P61619-3;F8W776;Q8TC24;Q9H9S3-2;Q9H9S3-3;Q9H9S3;H7C1Q9;H7C069;A6NK38;F2Z2C7;A6NIF9;C9JJV4;H7C1S8	P61619;B4DR61;P61619-3;F8W776;Q8TC24;Q9H9S3-2;Q9H9S3-3;Q9H9S3	-0.0863958	-2.1539	0.433439	-0.630921					0.52628	0.957696	0.37104	0.751191	-0.559694	-0.740742	0.212751	-0.75576	-0.74859	-0.638831	0.0637024	0.300902	4	3	3	3	5	4	3	1	4	3	6	5	4	3	4	1
SEC61B	Protein transport protein Sec61 subunit beta	P60468;S4R3B5	P60468	-1.17475	-0.283037	0.903454	-0.035375					0.814974	0.589639	0.246365	0.515167	-0.580398	-0.867566	0.223781	-0.832718	-0.468513	-0.764987	-0.0448453	-0.415745	2	2	3	3	2	2	2	2	3	3	3	3	2	2	2	2
SEH1L	Nucleoporin SEH1	Q96EE3;Q96EE3-1;K7ELV2;K7ENI5;K7EP88;K7EPZ5	Q96EE3;Q96EE3-1;K7ELV2	-0.297519	-0.359996	2.48787	0			+		0.589795	0.613417	0.0294468	0.5	0.0658509	0.278497	-0.0870894	0.389196	NaN	NaN	0.337797	NaN	0	0	0	0	2	2	0	0	0	0	0	0	0	1	0	0
SEPT11	Septin-11	D6RGI3;Q9NVA2;D6RER5;Q9NVA2-2;D6RDU5;H0Y961;D6RDP1;D6R9Y6;H0Y9G8	D6RGI3;Q9NVA2;D6RER5;Q9NVA2-2;D6RDU5	-0.0795521	-0.329692	-0.174132	-0.171622					0.524201	0.6041	0.552593	0.573187	-1.04572	-0.869214	-0.877407	-0.172864	-1.14336	-0.87455	-0.840696	-0.238061	15	12	16	13	9	8	12	12	11	10	16	13	10	9	11	11
SEPT2	Septin-2	Q15019;Q15019-2;B5MCX3;Q15019-3;C9J2Q4;C9JB25;C9J938;H7C2Y0;C9IY94;H7C310;C9IZU3;C9JQJ4;B5MD47;C9JZI2;C9JFT1;F8WB65;C9JT15;C9JSE7	Q15019;Q15019-2;B5MCX3;Q15019-3;C9J2Q4;C9JB25	-0.213898	-0.13973	-0.0220737	0.0307351					0.564824	0.544539	0.506686	0.486821	-0.589749	-0.563611	-0.633617	-0.136061	-0.772589	-0.543984	-0.675415	-0.13598	11	13	15	14	13	9	11	13	12	12	15	13	10	12	13	13
SEPT7	Septin-7	E7ES33;Q16181-2;Q16181;E7EPK1;G3V1Q4;H0Y3Y4;Q5JXL7;Q6ZU15	E7ES33;Q16181-2;Q16181;E7EPK1;G3V1Q4;H0Y3Y4	-0.134465	-0.111135	0.0565153	0.157693					0.54086	0.535452	0.482886	0.432693	-0.589488	-0.537633	-0.659944	-0.0859358	-0.790311	-0.550221	-0.653622	-0.100148	8	10	11	10	8	5	9	10	10	8	9	10	7	5	10	8
SEPT8	Septin-8	A0A087X142;Q92599-2;A6NMH6;A6NFQ9;Q92599-4;F8W8I8;Q92599;Q92599-3;C9JV02;C9J4G8	A0A087X142;Q92599-2;A6NMH6;A6NFQ9;Q92599-4;F8W8I8;Q92599;Q92599-3	-0.936628	0.200566	0.460278	-0.379427					0.762597	0.43621	0.363365	0.658322	0.195074	NaN	NaN	NaN	NaN	NaN	NaN	0.166237	0	0	1	0	1	0	1	1	1	0	0	0	1	0	1	1
SEPT9	Septin-9	Q9UHD8-5;Q9UHD8-7;Q9UHD8-2;Q9UHD8;Q9UHD8-3;Q9UHD8-4;Q9UHD8-9;Q9UHD8-8;K7ENL0;K7EPY1;K7EL40;K7EJV0;K7EK18;K7EJ51;K7ER52;K7EIE4;K7ER14;K7EQD7;K7ELJ9;K7EIR4;K7EKN4;K7EN52;K7ENQ5;K7EJZ2;K7EJL9;K7ER34;K7ERG1;K7EQ08	Q9UHD8-5;Q9UHD8-7;Q9UHD8-2;Q9UHD8;Q9UHD8-3	0.101715	-0.151278	-0.50601	-0.255128					0.469068	0.548203	0.649586	0.608059	-1.07308	-1.02231	-0.127178	-0.90594	-1.41429	-0.964881	-0.134742	-1.02378	13	11	18	11	9	8	9	11	10	10	20	15	8	8	10	12
SERBP1	Plasminogen activator inhibitor 1 RNA-binding protein	Q8NC51;Q8NC51-3;Q8NC51-2;Q8NC51-4	Q8NC51;Q8NC51-3;Q8NC51-2;Q8NC51-4	-1.9188	-0.0999187	0.0819165	-0.766188					0.928419	0.531882	0.475203	0.794933	0.276926	0.219503	0.284543	0.208286	0.0422886	0.221668	0.139118	0.0043005	4	4	5	4	3	3	2	3	4	4	4	5	3	2	3	3
SERPINB12	Serpin B12	Q96P63;Q96P63-2	Q96P63;Q96P63-2	-0.936628	-0.799434	-1.41199	0.602993					0.762597	0.738939	0.858162	0.258421	NaN	NaN	-2.53152	NaN	NaN	NaN	NaN	NaN	0	0	1	0	2	0	1	0	1	0	1	1	3	1	0	0
SERPINB2	Plasminogen activator inhibitor 2	P05120;H7C004;H7BYS2;E7ERB5;E7EPJ9;E9PDK7	P05120	1.69171	0.84118	-0.840169	0					0.0983805	0.250313	0.738238	0.5	1.17079	2.7384	1.75789	NaN	1.65611	1.22862	2.29617	NaN	1	3	3	0	5	2	0	0	0	0	1	0	6	3	0	0
SERPINB3	Serpin B3	Q5K684;P29508;P29508-2	Q5K684;P29508;P29508-2	-0.297519	-0.359996	-3.09573	0.602993					0.589795	0.613417	0.990626	0.258421	NaN	NaN	1.6649	NaN	NaN	NaN	NaN	NaN	0	0	0	0	0	0	1	0	0	0	0	0	2	5	0	0
SERPINB6	Serpin B6	P35237;A0A024QZX5;A0A087X1N8;C9JTJ8	P35237;A0A024QZX5;A0A087X1N8	0.14595	0.947341	-1.63218	-1.17991					0.455663	0.224075	0.89238	0.897674	-0.174534	0.0164717	0.340689	0.226847	-0.269104	-0.156186	0.143416	0.114213	2	3	4	4	2	0	1	2	2	2	2	2	2	2	1	3
SERPINC1	Antithrombin-III	P01008;Q8TCE1	P01008	2.28744	1.97638	2.92326	2.58496	+		+	+	0.0404577	0.0567773	0.0132239	0.00272758	NaN	NaN	NaN	NaN	1.65069	3.02608	2.76071	1.2715	1	1	2	1	1	2	1	2	0	0	0	0	1	0	0	0
SERPINE1	Plasminogen activator inhibitor 1	P05121;P05121-2	P05121;P05121-2	-0.652178	-1.237	-0.0970906	-0.433296					0.690629	0.839017	0.529383	0.679319	-1.37812	-1.82006	NaN	-1.9941	-2.52564	-2.24401	NaN	NaN	2	2	5	2	0	0	0	1	2	2	6	5	0	0	1	1
SERPINE2	Glia-derived nexin	P07093-2;P07093;P07093-3;C9JN98	P07093-2;P07093;P07093-3;C9JN98	-0.297519	-0.605442	-0.0970906	0					0.589795	0.686075	0.529383	0.5	NaN	NaN	NaN	NaN	NaN	NaN	NaN	NaN	0	0	1	0	0	0	0	0	0	0	1	2	0	0	0	0
SERPINH1	Serpin H1	P50454;E9PPV6;E9PR70;E9PK86;E9PMI5;E9PKH2;E9PNX1;E9PIG2;E9PRS3;E9PJH8;E9PQ34;E9PLA6;H0YEP8	P50454;E9PPV6;E9PR70;E9PK86;E9PMI5;E9PKH2	-0.259882	-0.23585	-0.172691	-0.0125459					0.578595	0.57489	0.55216	0.50538	-1.66083	-1.83911	-1.11576	-0.824125	-2.06833	-1.82664	-1.18319	-0.99551	24	24	23	21	20	17	24	22	24	23	25	26	22	20	22	23
SF1	Splicing factor 1	Q15637-4;Q15637-6;Q15637-3;Q15637-2;Q15637;Q15637-7;Q15637-5;C9J792;F8WEV5;H0Y7L4;B1AK53-2;A0A0A0MSQ4;B1AK53	Q15637-4;Q15637-6;Q15637-3;Q15637-2;Q15637;Q15637-7;Q15637-5	2.49571	1.69558	4.31191	4.41035	+		+	+	0.0284349	0.0872961	0.000530301	1.06e-06	1.13166	0.834118	0.0591953	0.0724427	0.457732	0.835965	0.00457871	-0.0343633	3	5	1	2	7	5	5	2	1	2	2	1	1	0	0	0
SF3A1	Splicing factor 3A subunit 1	Q15459;Q15459-2;F8WB66;H7C1L2;F8WC79	Q15459;Q15459-2	-0.936628	-0.716467	0.359281	0.566704					0.762597	0.716898	0.392506	0.271193	0.501086	0.381041	0.0762857	0.429144	NaN	0.340876	0.0509134	NaN	1	1	6	3	2	2	0	1	1	0	6	2	1	2	0	0
SF3A2	Splicing factor 3A subunit 2	Q15428;K7EMT0	Q15428;K7EMT0	1.01148	-1.48985	3.19634	1.14393			+		0.220119	0.883539	0.00761404	0.109398	0.428501	0.472154	-0.125169	0.314438	0.867471	0.848983	0.0715796	0.339689	0	1	0	1	2	3	2	1	0	0	2	1	1	2	3	2
SF3A3	Splicing factor 3A subunit 3	Q12874	Q12874	0.294579	0.65098	0.460278	2.33277				+	0.411077	0.301108	0.363365	0.00607523	0.368918	0.434609	0.00443073	0.43251	0.633531	0.438988	NaN	1.26651	1	2	4	3	1	0	1	1	1	1	3	1	0	0	0	0
SF3B1	Splicing factor 3B subunit 1	O75533;H7C341;O75533-2;B4DGZ4	O75533	1.17	0.22841	1.97264	1.30928					0.185995	0.427446	0.067095	0.0796427	0.44872	0.421675	-0.0108267	0.378105	0.350603	0.44849	0.209266	0.210648	14	13	26	25	5	2	8	4	4	10	23	19	2	2	3	1
SF3B14	Pre-mRNA branch site protein p14	Q9Y3B4	Q9Y3B4	-0.297519	3.44736	0.889204	-0.671177		+			0.589795	0.00288846	0.249789	0.764705	0.458785	0.311728	0.0471929	0.463594	0.520826	0.490461	0.0990655	NaN	1	1	4	5	3	4	1	1	1	1	3	3	3	1	2	1
SF3B2	Splicing factor 3B subunit 2	A0A087WZZ5;Q13435;E9PPJ0;E9PJ04;H0YCG1;E9PJT3;H0YEX5;E9PIL8	A0A087WZZ5;Q13435;E9PPJ0	2.49999	1.42656	1.31704	0	+				0.0282227	0.126686	0.158655	0.5	0.564453	0.403141	0.103845	0.300898	0.499307	0.517686	0.0088399	NaN	4	4	7	8	1	1	1	0	1	1	4	5	1	1	0	1
SF3B3	Splicing factor 3B subunit 3	Q15393;Q15393-3;Q15393-2;I3L4G7;J3QL37;H3BMB0;J3QRB2;J3QKV4	Q15393	2.72153	0.726768	0.765315	1.20028	+				0.0189183	0.280318	0.280591	0.0984726	0.617546	0.403107	-0.108184	0.424563	0.34253	0.155403	-0.071966	0.39491	12	8	15	20	23	21	17	4	1	4	13	7	16	17	8	3
SF3B5	Splicing factor 3B subunit 5	Q9BWJ5	Q9BWJ5	-0.297519	1.58451	-0.0970906	0					0.589795	0.10228	0.529383	0.5	0.715391	0.401896	-0.0446727	0.268677	NaN	0.368895	NaN	NaN	0	0	3	2	0	0	0	0	0	0	1	1	0	0	0	0
SFN	14-3-3 protein sigma	P31947-2;P31947	P31947-2;P31947	0.87333	-0.0969617	-0.0977711	0.192431					0.252584	0.53094	0.529588	0.418058	0.038985	0.123332	-0.112496	-0.286402	-0.0196179	0.0842632	0.224281	0.114837	1	1	1	1	1	1	1	1	1	1	1	1	1	1	1	1
SFPQ	Splicing factor, proline- and glutamine-rich	P23246;P23246-2;H0Y9K7;H0Y9U2	P23246;P23246-2	0.0990871	-0.256383	0.395207	0.817158					0.469866	0.581322	0.382061	0.18985	0.67351	0.594466	-0.0429927	0.0132624	0.491219	0.722128	0.0150946	-0.0884228	21	20	16	16	24	22	16	19	16	16	17	16	17	16	10	10
SFXN1	Sideroflexin-1	Q9H9B4;S4R2X2;D6RFI0;D6RDG7	Q9H9B4;S4R2X2;D6RFI0	-1.98151	-0.359996	-0.0970906	0					0.934728	0.613417	0.529383	0.5	NaN	NaN	NaN	NaN	-0.0432429	NaN	NaN	NaN	0	1	0	0	0	0	0	0	1	2	0	0	0	0	0	0
SGOL2	Shugoshin-like 2	Q562F6-2;Q562F6;Q562F6-3;C9JW92	Q562F6-2;Q562F6;Q562F6-3	-0.297519	-0.359996	2.53224	0			+		0.589795	0.613417	0.0272603	0.5	NaN	NaN	NaN	NaN	NaN	NaN	0.479717	NaN	0	0	0	0	3	1	0	0	0	0	0	0	0	0	0	0
SGSH	N-sulphoglucosamine sulphohydrolase	P51688;I3L2I6;I3L4B7;I3L2L4	P51688;I3L2I6;I3L4B7;I3L2L4	-2.58596	-0.352811	-0.0970906	0					0.975762	0.611214	0.529383	0.5	NaN	NaN	NaN	NaN	NaN	NaN	NaN	NaN	0	0	1	0	0	0	0	0	1	2	1	0	0	0	0	0
SH3BGRL3	SH3 domain-binding glutamic acid-rich-like protein 3	Q5T123;Q9H299;A0A087WV23	Q5T123;Q9H299;A0A087WV23	0.702481	1.22497	-0.0970906	-0.0681843					0.295973	0.163349	0.529383	0.529216	-0.498695	-0.586928	-0.0344962	-0.356985	NaN	-0.57344	NaN	NaN	1	1	2	1	0	0	1	0	0	0	1	1	1	0	1	0
SHMT2	Serine hydroxymethyltransferase, mitochondrial;Serine hydroxymethyltransferase	P34897-3;P34897;P34897-2;H0YIZ0;G3V2Y4;G3V5L0;G3V4W5;G3V540;G3V2D2;G3V241;G3V3Y8;G3V4T0;G3V4X0;G3V2W0;G3V2E4	P34897-3;P34897;P34897-2;H0YIZ0;G3V2Y4	-0.731512	-0.0164536	0.108636	0.68113					0.711636	0.505255	0.467131	0.232018	0.800109	0.592233	-0.172978	0.650201	0.748117	0.592682	-0.252171	0.521795	4	7	10	8	6	8	4	5	6	8	12	10	5	9	4	6
SHROOM3	Protein Shroom3	Q8TF72	Q8TF72	0.879542	-0.359996	-0.512468	-0.0557184					0.251072	0.613417	0.651401	0.523881	3.64749	1.30158	6.77115	4.03857	5.52484	NaN	8.37856	8.29941	1	1	0	0	1	1	1	1	1	1	0	0	1	1	1	1
SKIV2L2	Superkiller viralicidic activity 2-like 2	P42285;H0YAC4;H0Y8U3;D6REC7	P42285	1.17378	1.24896	1.66873	-1					0.185224	0.158655	0.102572	0.858814	1.04358	0.671445	0.217322	0.636483	NaN	1.00649	0.290673	NaN	2	1	2	3	4	4	0	0	1	1	1	2	1	3	1	1
SLC16A3	Monocarboxylate transporter 4	O15427;J3QQV2;J3QSC3;J3KTI8;J3QQS9;J3KT83;J3QRA0;J3QRP8;J3QLE3;J3KTM6;J3QRU2	O15427;J3QQV2;J3QSC3;J3KTI8	2.14425	-2.45512	-0.00810332	0.759599					0.0509056	0.975335	0.502455	0.207086	-0.210396	-0.301759	-0.321332	0.727948	0.123962	-0.729251	-0.382912	0.470657	1	3	2	1	5	3	4	0	0	1	5	3	4	5	2	1
SLC1A5	Neutral amino acid transporter B(0)	Q15758;M0QXM4;Q15758-3;Q15758-2;M0QX44;M0R144	Q15758;M0QXM4;Q15758-3;Q15758-2	-1.24843	0.520961	-0.0970906	-0.493266					0.829603	0.338297	0.529383	0.702036	0.145242	-0.12775	0.187796	0.0101964	0.181457	-0.160212	NaN	NaN	0	2	6	3	0	0	0	0	1	2	4	2	0	0	0	1
SLC25A11	Mitochondrial 2-oxoglutarate/malate carrier protein	I3L1P8;Q02978;Q02978-2	I3L1P8;Q02978;Q02978-2	-1.24278	-0.878405	-0.0970906	-0.0274752					0.828507	0.759068	0.529383	0.511781	NaN	NaN	NaN	0.6457	0.317547	0.0310482	NaN	0.328115	1	4	4	3	0	0	1	2	2	8	7	3	0	0	1	1
SLC25A3	Phosphate carrier protein, mitochondrial	Q00325-2;F8VVM2;Q00325;F8VWQ0;F8VZL5;F8VWR4	Q00325-2;F8VVM2;Q00325	-1.03694	-1.064	0.537756	-0.397007					0.785593	0.802868	0.341524	0.665232	-0.261554	-0.317005	-0.114782	-0.487225	-0.170727	-0.388441	-0.386794	-0.529573	1	2	2	0	1	1	1	1	0	2	2	1	1	0	1	1
SLC25A5	ADP/ATP translocase 2;ADP/ATP translocase 2, N-terminally processed	P05141;Q9H0C2	P05141	-1.18389	-1.31723	-0.125592	0					0.816829	0.854209	0.537985	0.5	0.596811	0.44839	0.156468	0.371144	0.251795	0.368667	NaN	NaN	1	3	3	2	1	0	0	0	2	4	3	2	1	1	0	0
SLC25A6	ADP/ATP translocase 3	P12236	P12236	-0.313285	-0.823011	-0.508201	-1.36362					0.594465	0.745038	0.650202	0.928662	0.207785	0.0511846	0.0274793	-0.0589814	0.155526	0.0318956	0.0975081	-0.16676	10	9	8	9	5	2	1	2	9	10	9	8	6	3	4	1
SLC2A1	Solute carrier family 2, facilitated glucose transporter member 1	P11166;A6NL68;A0A0D9SG74;A0A0D9SFK9	P11166	-1.51655	-0.776613	-0.106533	-0.119365					0.8764	0.732966	0.532234	0.551051	-0.276184	-0.825433	-0.447172	0.206267	NaN	-0.615012	-0.440921	NaN	0	0	2	2	1	1	1	0	0	2	2	1	2	1	1	0
SLC39A7	Zinc transporter SLC39A7	A0A087WTX2;Q92504;A2AAT0	A0A087WTX2;Q92504;A2AAT0	-1.59076	-2.10249	-1.64117	0.156759					0.88759	0.953851	0.893637	0.433088	NaN	-0.896012	0.0245174	-0.568489	-1.0025	NaN	-0.406407	-0.692197	1	1	1	1	1	1	1	3	2	0	3	1	1	1	3	3
SLC3A2	4F2 cell-surface antigen heavy chain	P08195-2;P08195-3;F5GZS6;P08195;J3KPF3;P08195-4;H0YFX4;F5GZI0;F5H0E2;H0YFS2;F5H867	P08195-2;P08195-3;F5GZS6;P08195;J3KPF3;P08195-4	-0.207551	0.393964	-0.0970906	0					0.562917	0.376216	0.529383	0.5	0.516769	0.345095	NaN	NaN	1.17215	-0.0662848	NaN	NaN	0	2	1	1	0	0	0	0	0	1	1	1	0	0	0	0
SLFN5	Schlafen family member 5	Q08AF3;B4E128;Q08AF3-2;Q68D06-2;Q68D06;Q7Z7L1	Q08AF3;B4E128	1.48376	0.669383	2.0637	2.35422				+	0.128783	0.295996	0.0585668	0.0056901	0.0475204	0.111201	0.540967	-1.05374	-0.0358024	0	0.502509	-0.983263	3	2	1	2	3	2	2	1	0	2	3	2	1	2	0	0
SLIRP	SRA stem-loop-interacting RNA-binding protein, mitochondrial	Q9GZT3-2;Q9GZT3;A0A087WUN7;H0YJ40;G3V4X6;G3V2S9;H0YJW7;H0YJ07;H0YJU7;H0YJI1	Q9GZT3-2;Q9GZT3;A0A087WUN7;H0YJ40;G3V4X6;G3V2S9;H0YJW7	0.173778	-1.70055	-0.0970906	0					0.447256	0.913333	0.529383	0.5	0.0738904	0.0341244	-0.247011	-0.53904	0.166419	0.118586	NaN	NaN	1	1	1	1	0	0	0	0	0	2	1	1	1	0	0	0
SMAD3;SMAD9;SMAD2	Mothers against decapentaplegic homolog 3;Mothers against decapentaplegic homolog 9;Mothers against decapentaplegic homolog 2	P84022;H3BVD1;P84022-3;P84022-2;O15198-2;B7Z5N5;Q15796-2;Q15796;O15198;H0YMP2;H0YNV1;H0YL71;H0YKE2;H3BP09;H0YAK7;K7EJX0;P84022-4;Q99717;Q15797	P84022;H3BVD1;P84022-3;P84022-2;O15198-2;B7Z5N5;Q15796-2;Q15796;O15198	1.64116	0.935999	-0.0970906	0.566704					0.105237	0.226801	0.529383	0.271193	-0.330114	-0.821794	0.132765	-0.776915	-0.297142	-1.36674	NaN	-0.637822	1	1	2	1	0	0	0	1	1	0	2	1	0	0	0	0
SMARCA5	SWI/SNF-related matrix-associated actin-dependent regulator of chromatin subfamily A member 5	O60264	O60264	0.294579	0.529692	0.589043	1.28889					0.411077	0.335744	0.327348	0.0829392	0.669981	0.642741	0.0348643	0.396718	0.654942	0.678625	0.0959678	NaN	2	1	5	3	5	7	0	2	0	0	4	2	4	5	0	0
SMARCC2	SWI/SNF complex subunit SMARCC2	Q8TAQ2-2;Q8TAQ2-3;Q8TAQ2;F8VXC8;F8VZW6	Q8TAQ2-2;Q8TAQ2-3;Q8TAQ2;F8VXC8	-0.297519	-0.983727	-0.68296	0					0.589795	0.784545	0.697965	0.5	0.301348	0.314338	-0.00202313	0.279406	NaN	0.331271	NaN	NaN	0	0	2	2	0	0	0	0	0	0	3	3	1	0	0	0
SMC1A	Structural maintenance of chromosomes protein 1A	Q14683;G8JLG1;H0Y7K8;V9GY57;V9GYN9	Q14683;G8JLG1	-0.0156059	-0.00390242	1.28386	0.506734					0.50475	0.501247	0.164829	0.292966	1.07701	1.08661	-0.0931178	0.963198	1.11489	1.0995	-0.123356	0.71011	6	8	16	17	22	19	13	11	4	8	15	14	10	15	7	11
SMC2	Structural maintenance of chromosomes protein 2	O95347;O95347-2;Q5T821;A0A0C4DGE5	O95347;O95347-2	1.29458	0.678671	1.87441	-0.0681843					0.161623	0.293431	0.0773395	0.529216	2.16017	1.73854	-0.0325549	1.45768	1.28395	1.56791	-0.0193666	-0.676652	2	1	5	4	4	2	2	0	0	0	0	4	4	1	2	0
SMC3	Structural maintenance of chromosomes protein 3	Q9UQE7	Q9UQE7	0.0772223	0.502913	0.612583	0.351006					0.476507	0.343597	0.320922	0.352963	0.743775	0.785286	-0.0439244	0.633166	0.679624	1.03474	-0.0179944	0.716234	3	8	19	13	19	16	12	9	3	5	12	14	12	14	7	9
SMC4	Structural maintenance of chromosomes protein;Structural maintenance of chromosomes protein 4	E9PD53;Q9NTJ3;Q9NTJ3-2;C9JR83;C9JVD8;C9J578;C9J9E4	E9PD53;Q9NTJ3;Q9NTJ3-2	1.03723	-0.470618	2.46028	-0.870594			+		0.214343	0.646842	0.0308785	0.825336	1.85149	1.74507	0.0355201	0.819326	NaN	1.53695	0.00503221	NaN	2	1	5	7	3	3	1	0	0	0	6	6	1	2	2	0
SMCHD1	Structural maintenance of chromosomes flexible hinge domain-containing protein 1	A6NHR9-2;A6NHR9;J3KTL8;A6NHR9-3;J3KRK8;J3QSH1	A6NHR9-2;A6NHR9;J3KTL8	2.362	1.35073	2.75575	1.10973	+		+		0.0357502	0.13974	0.0182022	0.116442	0.52138	0.783216	0.0491143	0.670609	1.04007	0.967214	0.066893	0.172852	5	8	13	15	11	5	2	2	1	1	5	5	2	1	0	1
SMS	Spermine synthase	P52788;P52788-2;H7C2R7	P52788;P52788-2;H7C2R7	-0.489617	-0.195506	-0.156493	0.203757					0.645647	0.562194	0.547292	0.41331	0.101771	0.192002	0.0746763	0.527181	-0.138778	0.145394	-0.0366355	0.544564	2	4	4	5	3	3	1	3	1	3	6	3	2	1	2	2
SND1	Staphylococcal nuclease domain-containing protein 1	Q7KZF4;H7C597	Q7KZF4	-0.119284	-0.364619	-0.135017	-0.223834					0.536261	0.614833	0.540826	0.595076	-0.54706	-0.388992	-0.0121914	-0.433632	-0.73649	-0.443141	-0.0741832	-0.366932	38	37	40	41	33	36	27	32	32	38	39	42	32	34	32	34
SNRNP200	U5 small nuclear ribonucleoprotein 200 kDa helicase	O75643;B4E0P5;O75643-2	O75643	-0.879181	-0.471202	-0.344609	-0.42332					0.748841	0.647015	0.603206	0.675471	0.647756	0.495698	-0.022226	0.37443	0.554962	0.583933	-0.0277879	0.217839	23	21	30	39	39	40	28	16	18	26	40	43	44	43	27	23
SNRNP40	U5 small nuclear ribonucleoprotein 40 kDa protein	Q96DI7;Q96DI7-2;Q9NSS8	Q96DI7;Q96DI7-2	1.13541	0.0799332	-0.213415	-0.834405					0.193147	0.474485	0.564363	0.815138	1.14474	0.412444	-0.081513	0.442825	0.53319	0.552903	-0.0346725	0.146344	3	3	4	2	7	4	3	1	3	2	4	2	6	6	2	7
SNRNP70	U1 small nuclear ribonucleoprotein 70 kDa	P08621;P08621-2;P08621-3;M0QYR1;P08621-4;M0QX04	P08621;P08621-2;P08621-3;M0QYR1	0.650989	-0.0885007	0.222963	0.0218961					0.309691	0.528245	0.432784	0.49061	0.495137	0.557098	-0.0632382	0.610885	0.44564	0.585026	-0.0778039	0.491602	10	8	8	10	10	7	7	7	8	7	10	9	7	7	7	9
SNRPA	U1 small nuclear ribonucleoprotein A	P09012;M0R268;M0QXK2;M0R221;M0R2B8;M0R0G9;M0QZG7	P09012;M0R268;M0QXK2;M0R221;M0R2B8;M0R0G9;M0QZG7	0.280273	-0.588535	1.92326	1.68304				+	0.415329	0.681258	0.0721048	0.0352035	0.653832	0.592137	-0.0451737	0.673527	NaN	0.563873	-0.127522	0.24823	0	1	3	4	2	3	3	1	0	0	3	5	1	2	1	0
SNRPA1	U2 small nuclear ribonucleoprotein A	P09661;H0YKK0;H0YMA0;H0YLR3	P09661;H0YKK0;H0YMA0	0.685887	0.0623908	0.400587	0.119445					0.300363	0.480079	0.380504	0.448915	0.570371	0.516786	-0.000233823	0.439576	0.380734	0.536104	0.106772	0.345722	4	5	7	6	5	5	7	7	3	6	8	6	5	5	4	8
SNRPB2	U2 small nuclear ribonucleoprotein B	P08579	P08579	0.347822	-0.130801	0.593828	0.661596					0.395351	0.541704	0.326038	0.238474	0.572495	0.622333	0.0297628	0.433896	0.504554	0.553689	0.0151131	0.599999	3	3	4	6	3	2	3	3	2	2	3	7	3	2	2	1
SNRPD1	Small nuclear ribonucleoprotein Sm D1	P62314;J3QLI9;J3QLR7	P62314;J3QLI9	0.271725	0.273061	0.145327	0.393035					0.417874	0.413469	0.456068	0.336324	0.642942	0.585738	0.0143032	0.453899	0.658919	0.693751	0.0521962	0.464551	4	4	4	4	4	4	3	3	4	4	4	4	3	3	3	3
SNRPD2	Small nuclear ribonucleoprotein Sm D2	P62316;P62316-2;K7ERG4;K7EJB5	P62316;P62316-2;K7ERG4	-0.423881	0.250437	0.157023	0.254544					0.626818	0.420539	0.452549	0.392182	0.724216	0.634521	-0.00302905	0.436555	0.88403	0.747107	0.029996	0.463734	8	8	9	9	8	9	8	5	8	8	8	9	9	8	6	7
SNRPD3	Small nuclear ribonucleoprotein Sm D3	P62318-2;P62318;H3BT13	P62318-2;P62318;H3BT13	0.067679	0.12449	-0.129728	-0.119796					0.479407	0.460301	0.539232	0.551235	0.68416	0.583751	-0.0570345	0.409652	0.722825	0.746332	-0.0357366	0.476462	3	3	3	4	4	3	4	3	3	3	3	4	3	4	3	3
SNRPE	Small nuclear ribonucleoprotein E	P62304;A6NHK2	P62304;A6NHK2	-0.163792	0.598615	0.916511	0.820092					0.54973	0.315866	0.24325	0.188996	0.503243	0.587364	-0.0175303	0.274016	0.696493	0.784029	-0.124447	NaN	2	2	2	4	2	2	1	1	2	1	1	1	2	2	0	2
SNRPF	Small nuclear ribonucleoprotein F	P62306;A0A0B4J254;F8W0W6	P62306;A0A0B4J254;F8W0W6	-0.719727	0.0240987	-0.217545	-0.671177					0.708558	0.492303	0.565598	0.764705	0.842695	0.624309	-0.0344658	0.438429	0.681992	0.681772	0.0568262	NaN	2	2	3	3	3	3	0	0	2	2	3	2	1	2	1	0
SNRPG	Small nuclear ribonucleoprotein G;Small nuclear ribonucleoprotein G-like protein	P62308;A8MWD9;Q49AN9;F5H013;C9JVQ0	P62308;A8MWD9;Q49AN9;F5H013;C9JVQ0	-0.705421	0	-0.0952743	0.602993					0.704801	0.5	0.528834	0.258421	0.627674	0.533018	-0.0164688	-0.0502996	0.588398	0.719196	0.00564971	0.745459	2	1	2	2	2	2	1	2	1	2	3	2	2	3	2	1
SNRPN;SNRPB	Small nuclear ribonucleoprotein-associated proteins B and B;Small nuclear ribonucleoprotein-associated protein N	J3QLE5;P14678-2;P63162;P14678;P63162-2;A8MT02;P14678-3;J3KRY3;S4R3P3	J3QLE5;P14678-2;P63162;P14678;P63162-2;A8MT02;P14678-3;J3KRY3;S4R3P3	0.363013	0.279961	0.201838	0.230258					0.390893	0.411318	0.4391	0.402249	0.634445	0.560425	-0.0217624	0.4966	0.580857	0.662199	0.0662213	0.516775	6	5	6	7	7	8	8	5	5	6	6	6	7	8	7	5
SNW1	SNW domain-containing protein 1	Q13573;G3V4X8;G3V3A4;G3V5R3	Q13573;G3V4X8;G3V3A4	-4.49807	-5.66044	-6.51204	-6.78719					0.999701	0.999997	1	1	0.442711	0.31922	0.0581896	0.673671	0.808416	NaN	-0.470094	NaN	2	2	1	1	2	0	0	0	6	9	10	11	13	12	10	13
SNX18	Sorting nexin-18	Q96RF0-3;Q96RF0-2;Q96RF0	Q96RF0-3;Q96RF0-2;Q96RF0	1.07406	0.248961	-0.0970906	-0.493266					0.206237	0.421001	0.529383	0.702036	-1.68141	-1.49675	0.527511	-1.41467	NaN	-1.54919	NaN	NaN	2	1	1	1	0	0	0	0	1	0	2	2	0	0	0	1
SNX3	Sorting nexin-3	O60493;O60493-2;O60493-4;O60493-3	O60493;O60493-2;O60493-4;O60493-3	-0.0600805	0.992673	-0.0970906	0.795628					0.518283	0.213365	0.529383	0.196191	-0.348136	-0.729981	-0.695478	-0.311658	-0.312389	1.28164	NaN	NaN	3	4	4	2	0	0	1	1	4	3	2	1	0	0	1	1
SNX9	Sorting nexin-9	A0A087WYU1;Q9Y5X1	A0A087WYU1;Q9Y5X1	2.70784	1.68277	-0.0970906	0.566704	+				0.0194061	0.0889355	0.529383	0.271193	-0.753815	-1.09985	0.447574	-0.7015	-0.956701	-0.880793	NaN	NaN	2	1	5	3	0	0	0	1	0	0	2	1	0	0	0	0
SOAT1	Sterol O-acyltransferase 1	P35610-3;P35610-2;P35610;B1APM4	P35610-3;P35610-2;P35610	-0.297519	-0.359996	1.86132	1.84572				+	0.589795	0.613417	0.07879	0.0236191	0.151043	0.263454	0.443534	0.0916127	NaN	NaN	0.338537	0.405198	0	0	0	0	1	1	2	0	0	0	0	0	0	0	0	0
SOD2	Superoxide dismutase [Mn], mitochondrial	P04179-4;P04179;A0A0C4DFU2;P04179-2;A0A0C4DFU1;F5H3C5;F5GYZ5;G8JLJ2;P04179-3;A0A0C4DG56;G5E9P6;F5GXZ9	P04179-4;P04179;A0A0C4DFU2;P04179-2;A0A0C4DFU1;F5H3C5;F5GYZ5;G8JLJ2;P04179-3;A0A0C4DG56	2.87002	1.54235	0.460278	0.0734376	+				0.0142648	0.108433	0.363365	0.468538	-0.146513	-0.33025	3.02062	-1.2661	-0.225315	-0.671069	1.85611	NaN	3	4	5	0	1	1	1	1	0	1	2	1	1	1	0	1
SON	Protein SON	P18583-2;P18583-7;P18583;P18583-5;P18583-9;P18583-6;P18583-10;P18583-3;P18583-4;J3QSZ5;P18583-8;H7C1M2;H7C2G8	P18583-2;P18583-7;P18583;P18583-5;P18583-9;P18583-6;P18583-10;P18583-3;P18583-4;J3QSZ5;P18583-8	-1.35884	-0.359996	-3.79774	-1.47359					0.850095	0.613417	0.998034	0.943416	0.70557	0.561775	-0.168736	0.39502	NaN	NaN	NaN	NaN	0	1	0	0	0	0	0	0	1	1	0	0	4	3	2	0
SOS1	Son of sevenless homolog 1	G5E9C8;Q07889;Q07889-2;C9K0N6	G5E9C8;Q07889	5.48657	4.67778	3.0637	2.95859	+	+	+	+	1.42e-05	9.01e-05	0.010004	0.000735105	NaN	NaN	NaN	NaN	-0.806544	-0.652116	-0.572763	-0.0829779	13	12	12	7	3	3	2	6	0	0	0	0	1	0	0	0
SOS2	Son of sevenless homolog 2	Q07890-2;Q07890;A0A087X277;G3V5W3	Q07890-2;Q07890;A0A087X277	2.86524	2.83392	1.90291	0.566704	+	+			0.0143978	0.0116334	0.0742517	0.271193	NaN	NaN	NaN	NaN	-0.212232	-0.190552	0.0979079	NaN	2	4	2	5	2	2	0	1	0	0	0	0	0	0	0	0
SPATS2L	SPATS2-like protein	Q9NUQ6;Q9NUQ6-2;Q9NUQ6-4;Q9NUQ6-3;A0A0A0MSG5;B8ZZZ7;F8W6C2;C9JKE4;F8VZ02;F8VT91;C9JGM8;C9JW67;F2Z2S1;C9IZC3;C9J8M7;Q4ZFW0;F8WAV0;H7C2G5	Q9NUQ6;Q9NUQ6-2;Q9NUQ6-4;Q9NUQ6-3;A0A0A0MSG5;B8ZZZ7;F8W6C2	2.5129	0.629542	-0.0970906	0	+				0.0275917	0.307112	0.529383	0.5	-0.449464	-0.630737	0.0441475	-0.716394	-0.366962	-0.60377	NaN	NaN	2	2	1	1	0	1	0	0	0	1	1	3	0	0	0	0
SPCS1	Signal peptidase complex subunit 1	Q9Y6A9;C9JBL1;X6R2S6	Q9Y6A9;C9JBL1;X6R2S6	-0.297519	-0.611032	-1.80752	-0.0681843					0.589795	0.687661	0.915033	0.529216	-0.724464	-0.676663	-0.260699	NaN	NaN	-0.649516	NaN	NaN	0	0	0	1	0	1	1	0	0	0	1	2	2	1	1	0
SPCS2	Signal peptidase complex subunit 2	Q15005;A0A087WUC6;E9PI68;E9PL01;E9PRB9;H0YE04	Q15005;A0A087WUC6;E9PI68;E9PL01	-0.179452	-0.801266	0.218907	-0.397007					0.554456	0.739416	0.433995	0.665232	-0.519906	-0.460822	-0.0883673	-0.338664	-0.414433	-0.711989	-0.135465	-0.338057	1	4	2	3	3	3	5	3	1	4	0	4	3	4	3	4
SPCS3	Signal peptidase complex subunit 3	P61009	P61009	-2.29752	-0.97595	-0.411089	-1.92656					0.960206	0.782719	0.622529	0.980824	-0.0782271	-0.534158	NaN	NaN	-0.608152	-0.487615	NaN	NaN	1	2	2	2	1	0	0	1	2	2	2	2	1	1	1	2
SPRR2E;SPRR2F	Small proline-rich protein 2E;Small proline-rich protein 2F	P22531;Q96RM1	P22531;Q96RM1	-0.297519	-0.135866	-2.09845	0					0.589795	0.543313	0.944454	0.5	NaN	NaN	-2.41944	NaN	NaN	-2.0351	NaN	NaN	1	1	2	2	1	1	0	0	1	1	2	1	3	1	0	0
SPTAN1	Spectrin alpha chain, non-erythrocytic 1	Q13813;Q13813-3;Q13813-2;A0A0D9SGF6;A0A0D9SF54;A0A0D9SFF6;A0A0D9SFH4	Q13813;Q13813-3;Q13813-2;A0A0D9SGF6;A0A0D9SF54	8.14666	4.14323	6.66128	6.7863	+	+	+	+	2.55e-10	0.000454396	2.12e-07	1.49e-13	-0.461357	-0.134153	-0.547092	0.209924	-0.429885	-0.099053	-0.710899	0.336127	59	56	72	62	27	22	28	22	0	0	17	8	1	1	1	1
SPTBN1	Spectrin beta chain, non-erythrocytic 1	Q01082;A0A087WUZ3;Q01082-2;Q01082-3;F8W6C1;E9PJZ2;H0YJE6	Q01082;A0A087WUZ3;Q01082-2;Q01082-3	2.96461	2.31109	0.875315	1.06798	+	+			0.0118456	0.0321271	0.253151	0.125467	-0.371167	-0.0629701	-0.633153	0.331353	-0.475293	-0.139491	-0.897567	0.398998	28	28	57	43	4	6	8	10	3	6	19	9	2	2	4	3
SQRDL	Sulfide:quinone oxidoreductase, mitochondrial	Q9Y6N5;H3BNX3;H3BMS6;H3BV36;H3BNP9	Q9Y6N5;H3BNX3;H3BMS6	-1.38941	1.16386	-0.0970906	1.27468					0.855467	0.175704	0.529383	0.0852991	NaN	NaN	NaN	NaN	NaN	-1.09589	NaN	-0.872485	1	0	6	1	0	0	0	3	0	3	2	0	0	0	0	1
SQSTM1	Sequestosome-1	Q13501;E7EMC7;Q13501-2;E3W990;E9PFW8;C9JRJ8;D6RBF1;C9J6J8	Q13501;E7EMC7;Q13501-2;E3W990;E9PFW8	0.483454	0.785529	0.460278	0.795628					0.356104	0.264692	0.363365	0.196191	-0.786521	-1.0939	0.408036	-1.82946	-0.401421	-0.973446	NaN	-1.26969	1	1	5	1	1	0	0	2	0	1	1	1	0	0	0	1
SRM	Spermidine synthase	P19623;K7EKM4;K7EL89;K7ESL0	P19623;K7EKM4	-1.03694	1.15134	1.74013	-1.37943					0.785593	0.178306	0.0932097	0.930948	-0.537053	-0.346026	NaN	-0.0412741	-0.485318	-0.0952648	-0.00968725	NaN	2	3	3	1	4	3	0	1	0	3	2	0	2	1	1	1
SRP14	Signal recognition particle 14 kDa protein	P37108;H0YLA2	P37108;H0YLA2	0.38035	0.510246	0.449525	0.954936					0.385824	0.34144	0.366433	0.152313	0.84714	0.250757	-0.37981	0.589378	0.596598	0.302212	-0.322662	0.700873	3	4	3	3	4	5	3	3	3	2	3	3	1	3	2	2
SRP9	Signal recognition particle 9 kDa protein	P49458;E9PE20;P49458-2	P49458;E9PE20;P49458-2	-0.620188	0.828254	1.21249	0.109726					0.681974	0.253616	0.178625	0.453051	0.54246	0.293622	-0.244476	0.506484	0.600126	0.340257	-0.17079	0.311116	1	1	2	2	2	4	2	0	1	1	2	2	2	1	0	1
SRPR	Signal recognition particle receptor subunit alpha	P08240;P08240-2	P08240;P08240-2	-0.171095	-0.117063	1.54937	-1.86017					0.551935	0.537337	0.119717	0.977233	-0.495097	-0.616455	0.0555107	-0.405484	-0.558138	-0.32472	0.33159	-0.475881	2	4	4	3	1	2	2	1	1	4	3	3	1	1	1	2
SRPRB	Signal recognition particle receptor subunit beta	Q9Y5M8;H7C4H2;C9J5Z8	Q9Y5M8;H7C4H2	0.855316	1.64719	0.902909	0.795628					0.256995	0.0936101	0.246495	0.196191	-0.406797	-0.523873	0.126137	-0.500485	-0.430522	-0.655833	NaN	-0.31564	0	3	4	2	1	1	1	1	1	1	1	2	0	0	0	1
SRRT	Serrate RNA effector molecule homolog	Q9BXP5-4;Q9BXP5-2;Q9BXP5-3;Q9BXP5;Q9BXP5-5;H7C3A1;H7C1K0;A0A0A0MSP6	Q9BXP5-4;Q9BXP5-2;Q9BXP5-3;Q9BXP5;Q9BXP5-5;H7C3A1	1.69171	0.976376	2.17478	0.860956			+		0.0983805	0.21718	0.0493423	0.177345	0.517662	0.574643	0.0174498	0.430224	0.478719	0.390255	0.28037	NaN	3	3	1	4	3	1	1	1	0	0	4	1	0	1	1	1
SRSF1	Serine/arginine-rich splicing factor 1	Q07955;J3KTL2;Q07955-3;Q07955-2;J3QQV5;J3KSW7;J3KSR8	Q07955;J3KTL2;Q07955-3;Q07955-2	0.487445	-0.147846	0.480512	0.34652					0.35497	0.547115	0.357614	0.354756	0.509199	0.464056	-0.0422803	0.335648	0.375314	0.493476	-0.0100347	0.0377926	9	9	9	11	9	9	6	6	6	6	10	8	9	8	6	6
SRSF10	Serine/arginine-rich splicing factor 10	O75494-5;Q5JRI1;O75494-4;O75494-6;O75494-3;O75494-2;O75494;Q6IQ42;Q8WXF0;R4GMP8	O75494-5;Q5JRI1;O75494-4;O75494-6;O75494-3;O75494-2;O75494	1.02655	-0.339097	0.78436	2				+	0.216727	0.606998	0.275739	0.0157771	0.477054	0.395254	-0.0136794	0.457504	0.522693	0.398239	-0.159028	0.132484	4	4	5	5	3	4	3	3	4	3	5	4	3	3	2	2
SRSF11	Serine/arginine-rich splicing factor 11	Q5T760;Q05519-2;Q05519;B4DWT1;S4R3C4;Q5T757	Q5T760;Q05519-2;Q05519;B4DWT1	1.49443	0.0866263	-0.0970906	0					0.127081	0.472352	0.529383	0.5	0.44562	0.287511	0.104657	0.195353	0.50626	NaN	NaN	NaN	0	2	1	1	0	0	0	0	0	0	1	1	0	0	0	0
SRSF2	Serine/arginine-rich splicing factor 2	J3KP15;Q01130;J3QL05;Q01130-2;Q9BRL6-2;Q9BRL6	J3KP15;Q01130;J3QL05;Q01130-2	0.791856	-0.33234	0.671248	0.512108					0.272851	0.604916	0.305143	0.290982	0.7069	0.463847	-0.127487	0.419408	0.424268	0.478615	-0.0790445	0.217191	4	4	4	4	6	5	5	5	5	6	4	4	5	6	4	5
SRSF3	Serine/arginine-rich splicing factor 3	P84103;P84103-2;A0A087X2D0;REV__P84103	P84103;P84103-2;A0A087X2D0	-0.498343	0.17445	0.605864	-0.161532					0.648121	0.444458	0.322751	0.568929	0.587914	0.480101	-0.037193	0.269809	0.410847	0.476493	-0.0487646	0.102733	3	2	2	1	5	4	1	2	3	4	2	1	4	3	1	2
SRSF5	Serine/arginine-rich splicing factor 5	Q13243;Q13243-3;B4DJK0;B4DUA4;G3V5K8;Q13243-2	Q13243;Q13243-3;B4DJK0;B4DUA4	0.280273	1.6091	-0.0970906	0					0.415329	0.0988125	0.529383	0.5	0.45436	0.354339	-0.132526	0.179955	0.715325	0.70337	-0.0572231	NaN	1	2	2	3	2	1	0	0	0	1	0	1	2	1	0	0
SRSF6	Serine/arginine-rich splicing factor 6	Q13247-3;Q13247;Q13247-2;A0A0D9SGD2	Q13247-3;Q13247;Q13247-2	0.693706	0.263935	0.294748	-0.123995					0.298291	0.416317	0.411458	0.55302	0.81722	0.533942	-0.0351169	0.266932	0.496395	0.564436	-0.0287738	0.0290723	4	5	7	5	7	7	4	3	3	4	7	3	6	7	2	2
SRSF7	Serine/arginine-rich splicing factor 7	Q16629-3;Q16629-2;A0A0B4J1Z1;Q16629-4;C9JAB2;Q16629;F8WEA1	Q16629-3;Q16629-2;A0A0B4J1Z1;Q16629-4;C9JAB2;Q16629	0.849047	0.322183	0.774892	1.49731					0.25854	0.398219	0.278146	0.0537411	0.79274	0.520052	-0.0383167	0.412105	0.71197	0.614318	-0.0183652	0.221606	6	5	7	7	5	7	5	5	3	4	5	6	7	4	4	4
SRSF9	Serine/arginine-rich splicing factor 9	Q13242;H0YIB4;S4R3G0	Q13242;H0YIB4;S4R3G0	0.109449	-0.854948	0.0397142	-0.115477					0.466722	0.753179	0.487972	0.549397	0.732447	0.638845	-0.120184	0.749905	0.682754	0.560817	-0.0877224	0.577313	2	4	5	5	7	7	4	4	2	2	5	3	4	6	4	3
SSB	Lupus La protein	P05455;E7ERC4;E9PGX9;E9PFL9	P05455;E7ERC4	0.622137	1.17639	0.0082875	2.14393				+	0.317496	0.173124	0.49749	0.0105906	0.214216	0.189324	0.153971	0.0689769	0.245116	0.263255	0.461313	-0.0870608	8	5	11	8	5	2	4	3	3	5	8	5	2	2	1	0
SSBP1	Single-stranded DNA-binding protein, mitochondrial	Q04837;C9K0U8;E7EUY5	Q04837;C9K0U8;E7EUY5	0.0536944	0.124828	0.01953	0.0859893					0.48366	0.460194	0.494084	0.463175	0.455307	0.139072	-0.0269574	-0.093316	0.192149	-0.00776292	-0.055024	-0.191166	5	5	5	4	4	3	3	2	4	5	4	5	2	4	2	4
SSR1	Translocon-associated protein subunit alpha	C9J3L8;C9J5W0;P43307;E9PAL7;C9IZQ1;P43307-2;C9JBX5	C9J3L8;C9J5W0;P43307;E9PAL7;C9IZQ1;P43307-2	-0.877539	-1.064	-1.09709	-1					0.748441	0.802868	0.797577	0.858814	-0.737977	-0.995312	0.144989	-0.572577	1.85818	-0.960707	-0.0283925	NaN	2	0	1	1	2	2	0	0	1	2	3	3	1	1	1	1
SSR3	Translocon-associated protein subunit gamma	Q9UNL2;Q9UNL2-2;C9J365;C9JA28	Q9UNL2;Q9UNL2-2;C9J365;C9JA28	-1.24843	1.03882	-1.09709	0.506734					0.829603	0.202777	0.797577	0.292966	-0.63824	NaN	0.203871	-0.632844	NaN	NaN	NaN	NaN	1	1	1	1	0	0	1	1	1	2	0	1	1	1	0	1
SSR4	Translocon-associated protein subunit delta	P51571;A6NLM8	P51571;A6NLM8	-0.110402	-0.0556683	0.505979	-0.436183					0.533567	0.517776	0.350423	0.680429	-0.684065	-0.929155	0.108673	-0.586704	-0.782091	-0.8169	0.0542776	-0.568777	5	4	3	5	2	3	4	4	3	4	5	5	3	3	4	4
SSRP1	FACT complex subunit SSRP1	Q08945;E9PMD4;E9PPZ7	Q08945	0.0807843	0.0652883	0	0.281443					0.475424	0.479155	0.5	0.381115	1.40531	1.31016	0.0169172	1.34502	1.27127	1.36339	0.0166887	1.12223	10	12	18	17	18	18	14	16	9	13	15	18	15	18	11	16
ST13P4;ST13;ST13P5	Putative protein FAM10A4;Hsc70-interacting protein;Putative protein FAM10A5	Q8IZP2;P50502;H7C3I1;F6VDH7;Q3KNR6;A0A087X1H6;Q8NFI4	Q8IZP2;P50502;H7C3I1;F6VDH7;Q3KNR6;A0A087X1H6;Q8NFI4	-0.358837	0.299436	-0.0970906	0					0.607883	0.405263	0.529383	0.5	-0.0842801	0.0857558	0.0911567	0.179393	0.398577	0.130867	NaN	NaN	1	1	3	1	0	0	0	0	1	0	3	0	0	0	0	0
STAMBPL1	AMSH-like protease	B3KR00;Q96FJ0;Q96FJ0-2	B3KR00;Q96FJ0;Q96FJ0-2	1.03723	1.39456	-0.0970906	0					0.214343	0.132088	0.529383	0.5	-0.969424	NaN	NaN	NaN	NaN	-1.00739	NaN	NaN	1	0	1	0	0	0	0	0	0	0	0	0	0	0	0	0
STAT1	Signal transducer and activator of transcription 1-alpha/beta	P42224;P42224-2;J3KPM9;E7EPD2;D2KFR9;E7ENM1;E9PH66;H7BZB5	P42224;P42224-2;J3KPM9	0.145374	-0.0813017	0.242506	1.05044					0.455838	0.525951	0.426956	0.1294	0.70526	0.202042	0.321989	-0.433738	0.626415	0.189315	0.181297	-0.523458	5	4	9	5	1	2	0	5	3	4	9	8	1	2	1	3
STAT2	Signal transducer and activator of transcription 2	P52630-4;P52630;B4DLC8	P52630-4;P52630;B4DLC8	1.69171	-1.35281	-0.0970906	0					0.0983805	0.860629	0.529383	0.5	-1.47412	-1.28439	NaN	NaN	NaN	NaN	NaN	NaN	1	1	1	0	0	0	0	0	0	0	2	1	0	0	0	0
STAT3	Signal transducer and activator of transcription 3	P40763-3;P40763-2;P40763;G8JLH9	P40763-3;P40763-2;P40763;G8JLH9	-0.297519	1.48541	-0.0970906	0					0.589795	0.117157	0.529383	0.5	-0.945431	-0.724072	-0.930621	-0.280253	NaN	-0.770374	NaN	NaN	0	0	2	1	0	0	0	0	0	0	2	0	0	0	0	0
STAU1	Double-stranded RNA-binding protein Staufen homolog 1	O95793-2;O95793;A0A087X1A5;Q5JW30;O95793-3;Q5JW28;F6UDC6;G5EA18;Q9NUL3-4;E5RJN7;E7EVI1;Q9NUL3-6;A0A0A0MTC4;Q9NUL3-8;A0A0A0MTD1;Q9NUL3-3;F8VPI7;E7EPX0;Q9NUL3-7;A0A0A0MTC6;E7EVJ4;Q9NUL3-2;E9PH62;Q9NUL3;A0A0A0MTC5	O95793-2;O95793;A0A087X1A5;Q5JW30;O95793-3	0.702481	0.436941	-0.0970906	0					0.295973	0.363228	0.529383	0.5	-0.0238631	-0.0283165	-0.16261	0.183425	NaN	0.0180842	NaN	NaN	1	1	4	2	0	0	0	0	0	0	2	2	0	0	0	0
[truncated: 197 more rows]

## Sheet: List B
List of telomeric proteins
[truncated: 136 more rows]

## Sheet: List C
List of transformation-responsive telomeric proteins
[truncated: 41 more rows]
